# Supplementary material for: Systematic Phenotyping of a Large-Scale Candida glabrata Deletion Collection Reveals Novel Antifungal Tolerance Genes
Source: PLoS Pathog. 2014 Jun 19;10(6):e1004211. doi: 10.1371/journal.ppat.1004211 (PMC4063973; doi:10.1371/journal.ppat.1004211)
Supplement: Table S3 — Summary of auxotrophic C. glabrata deletion strains generated in the HTL and his3 backgrounds derived from the clinical isolate strain ATCC2001. Sheet 1: deletion strains + corresponding barcodes. Independent transformants of all generated gene deletion strains are listed with corresponding UP and DOWN tags, position in storage plates, number corresponding to the individual biological replicate (IBR#) for a targeted gene (e.g. the second of three independent replicates for CAGL0A01133g has IBR #2) and the nourseothricin marker used. All data can be searched online under: http://funpath.cdl.univie.ac.at. (Sheet 2: barcode sequences only). Bar-codes used as unique genomic tags in C. glabrata deletion strains. 2×96 upstream and downstream barcodes were used for every set of 96 gene deletion strains. These can be amplified from constant regions (U1+U2; D1+D2) identical in every deletion strain. Strains labeled with BM or BG carry individual barcodes and were made in the histidine auxotrophic strain derived from ATCC2001.The reference strain in the HTL background carries a unique barcode not used for any other strain. Barcode sequences were adopted from the systematic S. cerevisiae gene deletion project (http://www-sequence.stanford.edu/group/yeast_deletion_project/deletions3.html). (XLS) [file ppat.1004211.s012.xls]

## Sheet: DeletionStrains+Barcodes
Table S3. Summary of auxotrophic C. glabrata deletion strains generated in the HTL and his3 backgrounds derived from the clinical isolate strain ATCC2001.
1601	Deletions						Barcode sequences		Plate location			Indiv. Biol. Replicate
ID	Database ID	Alias	Barcode type	CgORF	Gene	ORF (Sc)	Up tag sequence	Down tag sequence	Set	row	col	IBR #	Marker	Background strain	Functional Category
1	88	TS78	barcode set	CAGL0A01133g	MDL2	YPL270W	GCTACAAACATAAGTGCGGC	CCGAGTTCTACTAGGTGTTA	TS_1	A	3	1	TEF1P-NAT1-TEF1T (based on pJK863)	HTL	Other
2	89	TS78	barcode set	CAGL0A01133g	MDL2	YPL270W	GCTACAAACATAAGTGCGGC	CCGAGTTCTACTAGGTGTTA	TS_1	A	3	2	TEF1P-NAT1-TEF1T (based on pJK863)	HTL	Other
3	90	TS78	barcode set	CAGL0A01133g	MDL2	YPL270W	GCTACAAACATAAGTGCGGC	CCGAGTTCTACTAGGTGTTA	TS_1	A	3	3	TEF1P-NAT1-TEF1T (based on pJK863)	HTL	Other
4	91	TS79	barcode set	CAGL0F06545g	RIM9	YMR063W	TTTAGTGTCCGCGCCACGTT	TATACTTGCGTAACGGGCCG	TS_1	E	7	1	TEF1P-NAT1-TEF1T (based on pJK863)	HTL	Other
5	92	TS79	barcode set	CAGL0F06545g	RIM9	YMR063W	TTTAGTGTCCGCGCCACGTT	TATACTTGCGTAACGGGCCG	TS_1	E	7	2	TEF1P-NAT1-TEF1T (based on pJK863)	HTL	Other
6	93	TS80	barcode set	CAGL0F06655g	AVO2	YMR068W	TATTCTCCGTGACGCGGGTT	AATTTAGGTGCGACCGCCCT	TS_1	E	8	1	TEF1P-NAT1-TEF1T (based on pJK863)	HTL	Cell wall organization
7	94	TS81	barcode set	CAGL0F07579g	CWP1	YKL096W	CCCGATTGGTTAATACCGAT	AAGAAGGTTTAATTCGCCCG	TS_1	E	10	1	TEF1P-NAT1-TEF1T (based on pJK863)	HTL	Cell wall organization
8	95	TS81	barcode set	CAGL0F07579g	CWP1	YKL096W	CCCGATTGGTTAATACCGAT	AAGAAGGTTTAATTCGCCCG	TS_1	E	10	2	TEF1P-NAT1-TEF1T (based on pJK863)	HTL	Cell wall organization
9	96	TS82	barcode set	CAGL0F06677g	GPA1	YHR005C	AATCGGTACTAAGTCGGTTC	CGGGTGTAGAAACCGACTAA	TS_1	E	9	1	TEF1P-NAT1-TEF1T (based on pJK863)	HTL	Other
10	97	TS82	barcode set	CAGL0F06677g	GPA1	YHR005C	AATCGGTACTAAGTCGGTTC	CGGGTGTAGAAACCGACTAA	TS_1	E	9	2	TEF1P-NAT1-TEF1T (based on pJK863)	HTL	Other
11	98	TS82	barcode set	CAGL0F06677g	GPA1	YHR005C	AATCGGTACTAAGTCGGTTC	CGGGTGTAGAAACCGACTAA	TS_1	E	9	3	TEF1P-NAT1-TEF1T (based on pJK863)	HTL	Other
12	99	TS83	barcode set	CAGL0F06677g	GPA1	YHR005C	CGCGCAGAGGTTAGATAAAT	CTGTACGTGCGATACTCGTT	TS_1	C	1	1	TEF1P-NAT1-TEF1T (based on pJK863)	HTL	Other
13	100	TS84	barcode set	CAGL0B02211g	CCH1	YGR217W	CCCTGTTATGAACCTTGATC	CGCTTCGAGTATGGGATATT	TS_1	A	10	1	TEF1P-NAT1-TEF1T (based on pJK863)	HTL	Transport
14	101	TS85	barcode set	CAGL0I03894g		YDL193W	GCTACAAACATAAGTGCGGC	CCGAGTTCTACTAGGTGTTA	TS_2	A	3	1	TEF1P-NAT1-TEF1T (based on pJK863)	HTL	Other
15	102	TS78	barcode set	CAGL0A01133g	MDL2	YPL270W	GCTACAAACATAAGTGCGGC	CCGAGTTCTACTAGGTGTTA	TS_1	A	3	1	TEF1P-NAT1-TEF1T (based on pJK863)	HTL	Other
16	103	TS86	barcode set	CAGL0A03586g		YLR040C	ATCGAACGTGTGTCAAACGC	ATAGCCGACTAACGAGCGTC	TS_1	A	4	1	TEF1P-NAT1-TEF1T (based on pJK863)	HTL	Cell wall organization
17	104	TS86	barcode set	CAGL0A03586g		YLR040C	ATCGAACGTGTGTCAAACGC	ATAGCCGACTAACGAGCGTC	TS_1	A	4	2	TEF1P-NAT1-TEF1T (based on pJK863)	HTL	Cell wall organization
18	105	TS87	barcode set	CAGL0B00858g	STE50	YCL032W	AATGTCGCGTAATGGCTTAG	ACCTTATGTGTAATGAGCGG	TS_1	A	7	1	TEF1P-NAT1-TEF1T (based on pJK863)	HTL	Signal transduction
19	106	TS87	barcode set	CAGL0B00858g	STE50	YCL032W	AATGTCGCGTAATGGCTTAG	ACCTTATGTGTAATGAGCGG	TS_1	A	7	2	TEF1P-NAT1-TEF1T (based on pJK863)	HTL	Signal transduction
20	107	TS87	barcode set	CAGL0B00858g	STE50	YCL032W	AATGTCGCGTAATGGCTTAG	ACCTTATGTGTAATGAGCGG	TS_1	A	7	3	TEF1P-NAT1-TEF1T (based on pJK863)	HTL	Signal transduction
21	108	TS84	barcode set	CAGL0B02211g	CCH1	YGR217W	CCCTGTTATGAACCTTGATC	CGCTTCGAGTATGGGATATT	TS_1	A	10	2	TEF1P-NAT1-TEF1T (based on pJK863)	HTL	Transport
22	109	TS83	barcode set	CAGL0D02882g	SSK1	YLR006C	CGCGCAGAGGTTAGATAAAT	CTGTACGTGCGATACTCGTT	TS_1	C	1	2	TEF1P-NAT1-TEF1T (based on pJK863)	HTL	Signal transduction
23	110	TS88	barcode set	CAGL0G04125g	SAG1	YJR004C	GCCCACATGGATAACATTAC	CGTAATAAGTGGGTAGAACC	TS_1	G	1	1	TEF1P-NAT1-TEF1T (based on pJK863)	HTL	Cell wall organization
24	111	TS89	barcode set	CAGL0G05896g	DSE2	YHR143W	AGACTAAGACCATTGTACCC	GGTAACACTATCTCAAGACC	TS_1	G	2	1	TEF1P-NAT1-TEF1T (based on pJK863)	HTL	Cell wall organization
25	112	TS81	barcode set	CAGL0F07579g	CWP1	YKL096W	CCCGATTGGTTAATACCGAT	AAGAAGGTTTAATTCGCCCG	TS_1	E	10	3	TEF1P-NAT1-TEF1T (based on pJK863)	HTL	Cell wall organization
26	113	TS+KdB	barcode set	CAGL0G09020g	TPK2	YPL203W	GGACCGACTATTCCCTAAAT	GCGCGGTCAGAACTAATATA	TS_3	E	11	1	TEF1P-NAT1-TEF1T (based on pJK863)	HTL	Signal transduction
27	114	TS+KdB	barcode set	CAGL0G09020g	TPK2	YPL203W	GGACCGACTATTCCCTAAAT	GCGCGGTCAGAACTAATATA	TS_3	E	11	2	TEF1P-NAT1-TEF1T (based on pJK863)	HTL	Signal transduction
28	115	TS+KdB	barcode set	CAGL0G09020g	TPK2	YPL203W	GGACCGACTATTCCCTAAAT	GCGCGGTCAGAACTAATATA	TS_3	E	11	3	TEF1P-NAT1-TEF1T (based on pJK863)	HTL	Signal transduction
29	116	TS+KdB	barcode set	CAGL0L00627g	KRH1	YOR371C	TTCTACCGTCGGAGGCAGTT	TTACGACCAGAACGGGACAC	TS_3	E	6	1	TEF1P-NAT1-TEF1T (based on pJK863)	HTL	Signal transduction
30	117	TS+KdB	barcode set	CAGL0M08404g	TPK1	YJL164C	CCCGATTGGTTAATACCGAT	AAGAAGGTTTAATTCGCCCG	TS_3	E	10	1	TEF1P-NAT1-TEF1T (based on pJK863)	HTL	Signal transduction
31	118	TS+KdB	barcode set	CAGL0M08404g	TPK1	YJL164C	CCCGATTGGTTAATACCGAT	AAGAAGGTTTAATTCGCCCG	TS_3	E	10	2	TEF1P-NAT1-TEF1T (based on pJK863)	HTL	Signal transduction
32	119	TS+KdB	barcode set	CAGL0K09944g	PDE2	YOR360C	GCGCTGCAATCAGAAAGGTA	CCAATGTACGCCAAGGTATA	TS_3	E	12	1	TEF1P-NAT1-TEF1T (based on pJK863)	HTL	Signal transduction
33	120	TS+KdB	barcode set	CAGL0K09944g	PDE2	YOR360C	GCGCTGCAATCAGAAAGGTA	CCAATGTACGCCAAGGTATA	TS_3	E	12	2	TEF1P-NAT1-TEF1T (based on pJK863)	HTL	Signal transduction
34	121	TS+KdB	barcode set	CAGL0I08195g	GPA2	YER020W	TATTAGTGCGGACCCGGCTT	CGGGAGGATTTATACTCAGT	TS_3	E	5	1	TEF1P-NAT1-TEF1T (based on pJK863)	HTL	Signal transduction
35	122	TS+KdB	barcode set	CAGL0I08195g	GPA2	YER020W	TATTAGTGCGGACCCGGCTT	CGGGAGGATTTATACTCAGT	TS_3	E	5	2	TEF1P-NAT1-TEF1T (based on pJK863)	HTL	Signal transduction
36	123	TS+KdB	barcode set	CAGL0J07282g	KRH2	YAL056W	TATTCTCCGTGACGCGGGTT	AATTTAGGTGCGACCGCCCT	TS_3	E	8	1	TEF1P-NAT1-TEF1T (based on pJK863)	HTL	Signal transduction
37	124	TS+KdB	barcode set	CAGL0J07282g	KRH2	YAL056W	TATTCTCCGTGACGCGGGTT	AATTTAGGTGCGACCGCCCT	TS_3	E	8	2	TEF1P-NAT1-TEF1T (based on pJK863)	HTL	Signal transduction
38	125	TS+KdB	barcode set	CAGL0J07282g	KRH2	YAL056W	TATTCTCCGTGACGCGGGTT	AATTTAGGTGCGACCGCCCT	TS_3	E	8	3	TEF1P-NAT1-TEF1T (based on pJK863)	HTL	Signal transduction
39	126	TS+KdB	barcode set	CAGL0B04521g	RAS1	YOR101W	AATCGGTACTAAGTCGGTTC	CGGGTGTAGAAACCGACTAA	TS_3	E	9	1	TEF1P-NAT1-TEF1T (based on pJK863)	HTL	Other
40	127	TS+KdB	barcode set	CAGL0K01507g	GPR1	YDL035C	TTACTTGCCCGAGCCGGATT	CACCCGAGTTACGATCAAAT	TS_3	E	4	1	TEF1P-NAT1-TEF1T (based on pJK863)	HTL	Signal transduction
41	128	TS84	barcode set	CAGL0B02211g	CCH1	YGR217W	CCCTGTTATGAACCTTGATC	CGCTTCGAGTATGGGATATT	TS_1	A	10	2	TEF1P-NAT1-TEF1T (based on pJK863)	HTL	Transport
42	129	TS84	barcode set	CAGL0B02211g	CCH1	YGR217W	CCCTGTTATGAACCTTGATC	CGCTTCGAGTATGGGATATT	TS_1	A	10	3	TEF1P-NAT1-TEF1T (based on pJK863)	HTL	Transport
43	130	TS90	barcode set	CAGL0B00968g	FUS1	YCL027W	AGGCAGATACGATTAGTACG	AAGTCTATATCAGTAGCGGG	TS_1	A	8	1	TEF1P-NAT1-TEF1T (based on pJK863)	HTL	Other
44	131	TS90	barcode set	CAGL0B00968g	FUS1	YCL027W	AGGCAGATACGATTAGTACG	AAGTCTATATCAGTAGCGGG	TS_1	A	8	2	TEF1P-NAT1-TEF1T (based on pJK863)	HTL	Other
45	132	TS90	barcode set	CAGL0B00968g	FUS1	YCL027W	AGGCAGATACGATTAGTACG	AAGTCTATATCAGTAGCGGG	TS_1	A	8	3	TEF1P-NAT1-TEF1T (based on pJK863)	HTL	Other
46	133	TS91	barcode set	CAGL0C02211g	UTR2	YEL040W	GCATTAACGGGAACTAGAGC	GTTAGGTCCATCCGCCATTG	TS_1	B	6	1	TEF1P-NAT1-TEF1T (based on pJK863)	HTL	Cell wall organization
47	134	TS91	barcode set	CAGL0C02211g	UTR2	YEL040W	GCATTAACGGGAACTAGAGC	GTTAGGTCCATCCGCCATTG	TS_1	B	6	2	TEF1P-NAT1-TEF1T (based on pJK863)	HTL	Cell wall organization
48	135	TS91	barcode set	CAGL0C02211g	UTR2	YEL040W	GCATTAACGGGAACTAGAGC	GTTAGGTCCATCCGCCATTG	TS_1	B	6	3	TEF1P-NAT1-TEF1T (based on pJK863)	HTL	Cell wall organization
49	136	TS92	barcode set	CAGL0E01771g	YPS6	YIR039C	GTATTCCGACTGCGGCACTT	TCGGTTAGAACAGTAGAGAC	TS_1	C	11	1	TEF1P-NAT1-TEF1T (based on pJK863)	HTL	Cell wall organization
50	137	TS92	barcode set	CAGL0E01771g	YPS6	YIR039C	GTATTCCGACTGCGGCACTT	TCGGTTAGAACAGTAGAGAC	TS_1	C	11	2	TEF1P-NAT1-TEF1T (based on pJK863)	HTL	Cell wall organization
51	138	TS93	barcode set	CAGL0F01463g	TIR1	YER011W	CCGGCTAGTTAATTTGACTC	GGCTCCACTAAATAGACGCA	TS_1	D	10	1	TEF1P-NAT1-TEF1T (based on pJK863)	HTL	Cell wall organization
52	139	TS93	barcode set	CAGL0F01463g	TIR1	YER011W	CCGGCTAGTTAATTTGACTC	GGCTCCACTAAATAGACGCA	TS_1	D	10	2	TEF1P-NAT1-TEF1T (based on pJK863)	HTL	Cell wall organization
53	140	TS93	barcode set	CAGL0F01463g	TIR1	YER011W	CCGGCTAGTTAATTTGACTC	GGCTCCACTAAATAGACGCA	TS_1	D	10	3	TEF1P-NAT1-TEF1T (based on pJK863)	HTL	Cell wall organization
54	141	TS94	barcode set	CAGL0F03883g	GAS3	YMR215W	TAAGGCGTCGTCACTACGGT	TCTATTAGTGGACAGTACGG	TS_1	E	3	1	TEF1P-NAT1-TEF1T (based on pJK863)	HTL	Cell wall organization
55	142	TS95	barcode set	CAGL0F07601g	CWP1	YKL096W	GGACCGACTATTCCCTAAAT	GCGCGGTCAGAACTAATATA	TS_1	E	11	1	TEF1P-NAT1-TEF1T (based on pJK863)	HTL	Cell wall organization
56	143	TS95	barcode set	CAGL0F07601g	CWP1	YKL096W	GGACCGACTATTCCCTAAAT	GCGCGGTCAGAACTAATATA	TS_1	E	11	2	TEF1P-NAT1-TEF1T (based on pJK863)	HTL	Cell wall organization
57	144	TS95	barcode set	CAGL0F07601g	CWP1	YKL096W	GGACCGACTATTCCCTAAAT	GCGCGGTCAGAACTAATATA	TS_1	E	11	3	TEF1P-NAT1-TEF1T (based on pJK863)	HTL	Cell wall organization
58	145	TS96	barcode set	CAGL0F07909g	HAL9	YOL089C	ATATAGCGTGACAGAGTACG	AAGTCAGGTCAATCATGCCC	TS_1	F	2	1	TEF1P-NAT1-TEF1T (based on pJK863)	HTL	Transcriptional regulation
59	146	TS96	barcode set	CAGL0F07909g	HAL9	YOL089C	ATATAGCGTGACAGAGTACG	AAGTCAGGTCAATCATGCCC	TS_1	F	2	2	TEF1P-NAT1-TEF1T (based on pJK863)	HTL	Transcriptional regulation
60	147	TS96	barcode set	CAGL0F07909g	HAL9	YOL089C	ATATAGCGTGACAGAGTACG	AAGTCAGGTCAATCATGCCC	TS_1	F	2	3	TEF1P-NAT1-TEF1T (based on pJK863)	HTL	Transcriptional regulation
61	148	TS97	barcode set	CAGL0F09053g	MNL1	YHR204W	ACATGGTTGAAAGCGCGTCA	TATGACTGCGGACGTTCGCT	TS_1	F	4	1	TEF1P-NAT1-TEF1T (based on pJK863)	HTL	Cell wall organization
62	149	TS97	barcode set	CAGL0F09053g	MNL1	YHR204W	ACATGGTTGAAAGCGCGTCA	TATGACTGCGGACGTTCGCT	TS_1	F	4	2	TEF1P-NAT1-TEF1T (based on pJK863)	HTL	Cell wall organization
63	150	TS97	barcode set	CAGL0F09053g	MNL1	YHR204W	ACATGGTTGAAAGCGCGTCA	TATGACTGCGGACGTTCGCT	TS_1	F	4	3	TEF1P-NAT1-TEF1T (based on pJK863)	HTL	Cell wall organization
64	151	TS98	barcode set	CAGL0G07667g	PRY2	YKR013W	GCCCAAATAAGACGTGAGCC	AGCACACGTAGGAACTATCC	TS_1	G	4	1	TEF1P-NAT1-TEF1T (based on pJK863)	HTL	Vacuole, Golgi
65	152	TS98	barcode set	CAGL0G07667g	PRY2	YKR013W	GCCCAAATAAGACGTGAGCC	AGCACACGTAGGAACTATCC	TS_1	G	4	2	TEF1P-NAT1-TEF1T (based on pJK863)	HTL	Vacuole, Golgi
66	153	TS98	barcode set	CAGL0G07667g	PRY2	YKR013W	GCCCAAATAAGACGTGAGCC	AGCACACGTAGGAACTATCC	TS_1	G	4	3	TEF1P-NAT1-TEF1T (based on pJK863)	HTL	Vacuole, Golgi
67	154	TS99	barcode set	CAGL0G09020g	TPK2	YPL203W	CATAAGCGTTGTGAATCGCG	TATACTGCGCGACATGCGAG	TS_1	G	7	1	TEF1P-NAT1-TEF1T (based on pJK863)	HTL	Signal transduction
68	155	TS99	barcode set	CAGL0G09020g	TPK2	YPL203W	CATAAGCGTTGTGAATCGCG	TATACTGCGCGACATGCGAG	TS_1	G	7	2	TEF1P-NAT1-TEF1T (based on pJK863)	HTL	Signal transduction
69	158	TS102	barcode set	CAGL0L05632g	PBS2	YJL128C	GTGCGAACCAACGTACTACA	GGTCGATAATAACACGCCAC	TS_3	B	3	1	TEF1P-NAT1-TEF1T (based on pJK863)	HTL	Signal transduction
70	159	TS102	barcode set	CAGL0L05632g	PBS2	YJL128C	GTGCGAACCAACGTACTACA	GGTCGATAATAACACGCCAC	TS_3	B	3	2	TEF1P-NAT1-TEF1T (based on pJK863)	HTL	Signal transduction
71	160	TS103	barcode set	CAGL0A00451g	PDR1	YGL013C	CGCCTAAGACCGGATAAAGC	GGGCTCGAGATTTAAACGGC	TS_1	A	1	1	TEF1P-NAT1-TEF1T (based on pJK863)	HTL	Transcriptional regulation
72	161	TS103	barcode set	CAGL0A00451g	PDR1	YGL013C	CGCCTAAGACCGGATAAAGC	GGGCTCGAGATTTAAACGGC	TS_1	A	1	2	TEF1P-NAT1-TEF1T (based on pJK863)	HTL	Transcriptional regulation
73	162	TS103	barcode set	CAGL0A00451g	PDR1	YGL013C	CGCCTAAGACCGGATAAAGC	GGGCTCGAGATTTAAACGGC	TS_1	A	1	3	TEF1P-NAT1-TEF1T (based on pJK863)	HTL	Transcriptional regulation
74	163	TS104	barcode set	CAGL0H06413g	CCW14	YLR390W-A	CCTAGAGACGTAGATATGCG	ATACACATCGGGTTAAGCGG	TS_1	H	8	1	TEF1P-NAT1-TEF1T (based on pJK863)	HTL	Cell wall organization
75	164	TS104	barcode set	CAGL0H06413g	CCW14	YLR390W-A	CCTAGAGACGTAGATATGCG	ATACACATCGGGTTAAGCGG	TS_1	H	8	2	TEF1P-NAT1-TEF1T (based on pJK863)	HTL	Cell wall organization
76	165	TS104	barcode set	CAGL0H06413g	CCW14	YLR390W-A	CCTAGAGACGTAGATATGCG	ATACACATCGGGTTAAGCGG	TS_1	H	8	3	TEF1P-NAT1-TEF1T (based on pJK863)	HTL	Cell wall organization
77	166	TS105	barcode set	CAGL0F05995g	MSN4	YKL062W	TTCTACCGTCGGAGGCAGTT	TTACGACCAGAACGGGACAC	TS_1	E	6	1	TEF1P-NAT1-TEF1T (based on pJK863)	HTL	Transcriptional regulation
78	167	TS105	barcode set	CAGL0F05995g	MSN4	YKL062W	TTCTACCGTCGGAGGCAGTT	TTACGACCAGAACGGGACAC	TS_1	E	6	2	TEF1P-NAT1-TEF1T (based on pJK863)	HTL	Transcriptional regulation
79	168	TS105	barcode set	CAGL0F05995g	MSN4	YKL062W	TTCTACCGTCGGAGGCAGTT	TTACGACCAGAACGGGACAC	TS_1	E	6	3	TEF1P-NAT1-TEF1T (based on pJK863)	HTL	Transcriptional regulation
80	169	TS106	barcode set	CAGL0E03982g	YBT1	YLL048C	ATTACCTAGTCGGAGACAGG	TATCAGTTCCGCAGACGGGT	TS_1	D	3	1	TEF1P-NAT1-TEF1T (based on pJK863)	HTL	Vacuole, Golgi
81	170	TS106	barcode set	CAGL0E03982g	YBT1	YLL048C	ATTACCTAGTCGGAGACAGG	TATCAGTTCCGCAGACGGGT	TS_1	D	3	2	TEF1P-NAT1-TEF1T (based on pJK863)	HTL	Vacuole, Golgi
82	171	TS106	barcode set	CAGL0E03982g	YBT1	YLL048C	ATTACCTAGTCGGAGACAGG	TATCAGTTCCGCAGACGGGT	TS_1	D	3	3	TEF1P-NAT1-TEF1T (based on pJK863)	HTL	Vacuole, Golgi
83	172	TS100	barcode set	CAGL0F01507g	SLG1	YOR008C	GTATTCCGACTGCGGCACTT	TCGGTTAGAACAGTAGAGAC	TS_3	B	9	2	TEF1P-NAT1-TEF1T (based on pJK863)	HTL	Signal transduction
84	173	TS100	barcode set	CAGL0F01507g	SLG1	YOR008C	GTATTCCGACTGCGGCACTT	TCGGTTAGAACAGTAGAGAC	TS_3	B	9	3	TEF1P-NAT1-TEF1T (based on pJK863)	HTL	Signal transduction
85	174	TS100	barcode set	CAGL0F01507g	SLG1	YOR008C	GTATTCCGACTGCGGCACTT	TCGGTTAGAACAGTAGAGAC	TS_3	B	9	4	TEF1P-NAT1-TEF1T (based on pJK863)	HTL	Signal transduction
86	175	TS107	barcode set	CAGL0G09757g		YLR278C	TTCACCGAGACAAGGCGAGA	AATAGGACGGAACGCCATCC	TS_1	G	9	1	TEF1P-NAT1-TEF1T (based on pJK863)	HTL	Transcriptional regulation
87	176	TS108	barcode set	CAGL0H03861g	HRB1	YNL004W	CCGAGTTAGGAATGTTATGC	TACGGAATTCGTACGTGCTC	TS_1	H	5	1	TEF1P-NAT1-TEF1T (based on pJK863)	HTL	Chromatin
88	177	TS108	barcode set	CAGL0H03861g	HRB1	YNL004W	CCGAGTTAGGAATGTTATGC	TACGGAATTCGTACGTGCTC	TS_1	H	5	2	TEF1P-NAT1-TEF1T (based on pJK863)	HTL	Chromatin
89	178	TS66	barcode set	CAGL0H04367g	WAR1	YML076C	TACCTATTGACCAGTGGGCG	TACGGATGTCGACTAACCAT	TS_1	H	6	1	TEF1P-NAT1-TEF1T (based on pJK863)	HTL	Transcriptional regulation
90	179	TS109	barcode set	CAGL0G00858g	MID2	YLR332W	CGGATATGTACTAATTGGGC	CCGCGTCTAGTATAGTATGT	TS_3	A	9	1	TEF1P-NAT1-TEF1T (based on pJK863)	HTL	Signal transduction
91	180	TS109	barcode set	CAGL0G00858g	MID2	YLR332W	CGGATATGTACTAATTGGGC	CCGCGTCTAGTATAGTATGT	TS_3	A	9	2	TEF1P-NAT1-TEF1T (based on pJK863)	HTL	Signal transduction
92	181	TS109	barcode set	CAGL0G00858g	MID2	YLR332W	CGGATATGTACTAATTGGGC	CCGCGTCTAGTATAGTATGT	TS_3	A	9	3	TEF1P-NAT1-TEF1T (based on pJK863)	HTL	Signal transduction
93	182	TS110	barcode set	CAGL0F04081g	TEC1	YBR083W	TTACTTGCCCGAGCCGGATT	CACCCGAGTTACGATCAAAT	TS_1	E	4	1	TEF1P-NAT1-TEF1T (based on pJK863)	HTL	Transcriptional regulation
94	183	TS110	barcode set	CAGL0F04081g	TEC1	YBR083W	TTACTTGCCCGAGCCGGATT	CACCCGAGTTACGATCAAAT	TS_1	E	4	2	TEF1P-NAT1-TEF1T (based on pJK863)	HTL	Transcriptional regulation
95	184	TS110	barcode set	CAGL0F04081g	TEC1	YBR083W	TTACTTGCCCGAGCCGGATT	CACCCGAGTTACGATCAAAT	TS_1	E	4	3	TEF1P-NAT1-TEF1T (based on pJK863)	HTL	Transcriptional regulation
96	192	TS112	barcode set	CAGL0D03674g	NEW1	YPL226W	CGGACGGTATTCATTCATCT	GCCGAACCTTCAACAGAGTA	TS_1	C	3	1	TEF1P-NAT1-TEF1T (based on pJK863)	HTL	Transcriptional regulation
97	193	TS112	barcode set	CAGL0D03674g	NEW1	YPL226W	CGGACGGTATTCATTCATCT	GCCGAACCTTCAACAGAGTA	TS_1	C	3	2	TEF1P-NAT1-TEF1T (based on pJK863)	HTL	Transcriptional regulation
98	194	TS112	barcode set	CAGL0D03674g	NEW1	YPL226W	CGGACGGTATTCATTCATCT	GCCGAACCTTCAACAGAGTA	TS_1	C	3	3	TEF1P-NAT1-TEF1T (based on pJK863)	HTL	Transcriptional regulation
99	195	TS113	barcode set	CAGL0E00385g	MDL1	YLR188W	GCCATTCGTATAACCGTGTC	GCGAGACCGCTTTACCAGAT	TS_1	C	9	1	TEF1P-NAT1-TEF1T (based on pJK863)	HTL	Transport
100	196	TS113	barcode set	CAGL0E00385g	MDL1	YLR188W	GCCATTCGTATAACCGTGTC	GCGAGACCGCTTTACCAGAT	TS_1	C	9	2	TEF1P-NAT1-TEF1T (based on pJK863)	HTL	Transport
101	197	TS113	barcode set	CAGL0E00385g	MDL1	YLR188W	GCCATTCGTATAACCGTGTC	GCGAGACCGCTTTACCAGAT	TS_1	C	9	3	TEF1P-NAT1-TEF1T (based on pJK863)	HTL	Transport
102	198	TS114	barcode set	CAGL0E06248g	RCN1	YKL159C	ACTAGATACACATGCGTGCC	ATTATCCTTAGGCGCGGCGT	TS_1	D	6	1	TEF1P-NAT1-TEF1T (based on pJK863)	HTL	Signal transduction
103	199	TS114	barcode set	CAGL0E06248g	RCN1	YKL159C	ACTAGATACACATGCGTGCC	ATTATCCTTAGGCGCGGCGT	TS_1	D	6	2	TEF1P-NAT1-TEF1T (based on pJK863)	HTL	Signal transduction
104	200	TS114	barcode set	CAGL0E06248g	RCN1	YKL159C	ACTAGATACACATGCGTGCC	ATTATCCTTAGGCGCGGCGT	TS_1	D	6	3	TEF1P-NAT1-TEF1T (based on pJK863)	HTL	Signal transduction
105	201	TS115	barcode set	CAGL0B03421g	HAP1	YLR256W	ATAGCCTTCTAAGAGCGGCG	AATCGGCGCTCACGCTTAGT	TS_1	A	12	1	TEF1P-NAT1-TEF1T (based on pJK863)	HTL	Transcriptional regulation
106	202	TS115	barcode set	CAGL0B03421g	HAP1	YLR256W	ATAGCCTTCTAAGAGCGGCG	AATCGGCGCTCACGCTTAGT	TS_1	A	12	2	TEF1P-NAT1-TEF1T (based on pJK863)	HTL	Transcriptional regulation
107	203	TS116	barcode set	CAGL0D03850g	RSC3	YDR303C	GTGAGCGAAACACCGCGTAA	GCGTGTGAATAATACGGAAC	TS_1	C	4	1	TEF1P-NAT1-TEF1T (based on pJK863)	HTL	Other
108	204	TS116	barcode set	CAGL0D03850g	RSC3	YDR303C	GTGAGCGAAACACCGCGTAA	GCGTGTGAATAATACGGAAC	TS_1	C	4	2	TEF1P-NAT1-TEF1T (based on pJK863)	HTL	Other
109	205	TS116	barcode set	CAGL0D03850g	RSC3	YDR303C	GTGAGCGAAACACCGCGTAA	GCGTGTGAATAATACGGAAC	TS_1	C	4	3	TEF1P-NAT1-TEF1T (based on pJK863)	HTL	Other
110	206	TS117	barcode set	CAGL0D01936g	SNF7	YLR025W	CGGCCTAACTGTAATTGATC	CTCGACGCTGGACGTTATGT	TS_1	B	11	1	TEF1P-NAT1-TEF1T (based on pJK863)	HTL	Other
111	207	TS117	barcode set	CAGL0D01936g	SNF7	YLR025W	CGGCCTAACTGTAATTGATC	CTCGACGCTGGACGTTATGT	TS_1	B	11	2	TEF1P-NAT1-TEF1T (based on pJK863)	HTL	Other
112	208	TS117	barcode set	CAGL0D01936g	SNF7	YLR025W	CGGCCTAACTGTAATTGATC	CTCGACGCTGGACGTTATGT	TS_1	B	11	3	TEF1P-NAT1-TEF1T (based on pJK863)	HTL	Other
113	209	TS117	barcode set	CAGL0J11506g	CHS1	YNL192W	AGGCAGATACGATTAGTACG	AAGTCTATATCAGTAGCGGG	TS_3	A	8	1	TEF1P-NAT1-TEF1T (based on pJK863)	HTL	Cell wall organization
114	210	TS117	barcode set	CAGL0J11506g	CHS1	YNL192W	AGGCAGATACGATTAGTACG	AAGTCTATATCAGTAGCGGG	TS_3	A	8	2	TEF1P-NAT1-TEF1T (based on pJK863)	HTL	Cell wall organization
115	211	TS117	barcode set	CAGL0J11506g	CHS1	YNL192W	AGGCAGATACGATTAGTACG	AAGTCTATATCAGTAGCGGG	TS_3	A	8	3	TEF1P-NAT1-TEF1T (based on pJK863)	HTL	Cell wall organization
116	212	TS115	barcode set	CAGL0B03421g	HAP1	YLR256W	ATAGCCTTCTAAGAGCGGCG	AATCGGCGCTCACGCTTAGT	TS_1	A	12	3	TEF1P-NAT1-TEF1T (based on pJK863)	HTL	Transcriptional regulation
117	213	TS118	barcode set	CAGL0E03476g	CDC25	YLR310C	AAATTGGTCGTAATGCGTCG	TATGTCGGACGCCGTAGACT	TS_1	D	1	2	TEF1P-NAT1-TEF1T (based on pJK863)	HTL	Signal transduction
118	214	TS119	barcode set	CAGL0F09229g		YER184C	CGACTATTGTGACATACCTG	ACGTTGATCGCATGAGATTG	TS_1	F	5	2	TEF1P-NAT1-TEF1T (based on pJK863)	HTL	Transcriptional regulation
119	215	TS120	barcode set	CAGL0G01056g	GAS2	YLR343W	ATTTCGGCACGCTCACGATG	TAACGCGACAGACGATATGC	TS_1	F	7	1	TEF1P-NAT1-TEF1T (based on pJK863)	HTL	Cell wall organization
120	216	TS120	barcode set	CAGL0G01056g	GAS2	YLR343W	ATTTCGGCACGCTCACGATG	TAACGCGACAGACGATATGC	TS_1	F	7	2	TEF1P-NAT1-TEF1T (based on pJK863)	HTL	Cell wall organization
121	217	TS120	barcode set	CAGL0G01056g	GAS2	YLR343W	ATTTCGGCACGCTCACGATG	TAACGCGACAGACGATATGC	TS_1	F	7	3	TEF1P-NAT1-TEF1T (based on pJK863)	HTL	Cell wall organization
122	218	TS121	barcode set	CAGL0H01683g		YDR520C	ACGGACACGACAGTAGTTCC	CCAGGGCGTGTTCATAAATA	TS_1	H	2	2	TEF1P-NAT1-TEF1T (based on pJK863)	HTL	Transcriptional regulation
123	219	TS121	barcode set	CAGL0H01683g		YDR520C	ACGGACACGACAGTAGTTCC	CCAGGGCGTGTTCATAAATA	TS_1	H	2	3	TEF1P-NAT1-TEF1T (based on pJK863)	HTL	Transcriptional regulation
124	220	TS122	barcode set	CAGL0G03597g	SHO1	YER118C	GGGCTACCTCTCAATTATAC	CGCTCCTAAGACATTGTTAC	TS_1	F	12	3	TEF1P-NAT1-TEF1T (based on pJK863)	HTL	Signal transduction
125	221	TS123	barcode set	CAGL0I03498g	STE7	YDL159W	GCTACAAACATAAGTGCGGC	CCGAGTTCTACTAGGTGTTA	TS_2	A	3	1	TEF1P-NAT1-TEF1T (based on pJK863)	HTL	Signal transduction
126	222	TS123	barcode set	CAGL0I03498g	STE7	YDL159W	GCTACAAACATAAGTGCGGC	CCGAGTTCTACTAGGTGTTA	TS_2	A	3	2	TEF1P-NAT1-TEF1T (based on pJK863)	HTL	Signal transduction
127	223	TS123	barcode set	CAGL0I03498g	STE7	YDL159W	GCTACAAACATAAGTGCGGC	CCGAGTTCTACTAGGTGTTA	TS_2	A	3	3	TEF1P-NAT1-TEF1T (based on pJK863)	HTL	Signal transduction
128	224	TS124	barcode set	CAGL0I04092g	SHE10	YGL228W	ATCGAACGTGTGTCAAACGC	ATAGCCGACTAACGAGCGTC	TS_2	A	4	1	TEF1P-NAT1-TEF1T (based on pJK863)	HTL	Other
129	225	TS124	barcode set	CAGL0I04092g	SHE10	YGL228W	ATCGAACGTGTGTCAAACGC	ATAGCCGACTAACGAGCGTC	TS_2	A	4	2	TEF1P-NAT1-TEF1T (based on pJK863)	HTL	Other
130	226	TS124	barcode set	CAGL0I04092g	SHE10	YGL228W	ATCGAACGTGTGTCAAACGC	ATAGCCGACTAACGAGCGTC	TS_2	A	4	3	TEF1P-NAT1-TEF1T (based on pJK863)	HTL	Other
131	227	TS125	barcode set	CAGL0I04862g	SNQ2	YDR011W	AAGATAGTCGCCGAACTCGC	AATCGACGCTAACGACTGAG	TS_2	A	5	1	TEF1P-NAT1-TEF1T (based on pJK863)	HTL	Transport
132	228	TS125	barcode set	CAGL0I04862g	SNQ2	YDR011W	AAGATAGTCGCCGAACTCGC	AATCGACGCTAACGACTGAG	TS_2	A	5	2	TEF1P-NAT1-TEF1T (based on pJK863)	HTL	Transport
133	229	TS125	barcode set	CAGL0I04862g	SNQ2	YDR011W	AAGATAGTCGCCGAACTCGC	AATCGACGCTAACGACTGAG	TS_2	A	5	3	TEF1P-NAT1-TEF1T (based on pJK863)	HTL	Transport
134	230	TS126	barcode set	CAGL0I05236g	BCY1	YIL033C	AATGTCGCGTAATGGCTTAG	ACCTTATGTGTAATGAGCGG	TS_2	A	7	1	TEF1P-NAT1-TEF1T (based on pJK863)	HTL	Signal transduction
135	231	TS126	barcode set	CAGL0I05236g	BCY1	YIL033C	AATGTCGCGTAATGGCTTAG	ACCTTATGTGTAATGAGCGG	TS_2	A	7	2	TEF1P-NAT1-TEF1T (based on pJK863)	HTL	Signal transduction
136	232	TS126	barcode set	CAGL0I05236g	BCY1	YIL033C	AATGTCGCGTAATGGCTTAG	ACCTTATGTGTAATGAGCGG	TS_2	A	7	3	TEF1P-NAT1-TEF1T (based on pJK863)	HTL	Signal transduction
137	233	TS127	barcode set	CAGL0I06138g	FAR1	YJL157C	CGGATATGTACTAATTGGGC	CCGCGTCTAGTATAGTATGT	TS_2	A	9	1	TEF1P-NAT1-TEF1T (based on pJK863)	HTL	Signal transduction
138	234	TS127	barcode set	CAGL0I06138g	FAR1	YJL157C	CGGATATGTACTAATTGGGC	CCGCGTCTAGTATAGTATGT	TS_2	A	9	2	TEF1P-NAT1-TEF1T (based on pJK863)	HTL	Signal transduction
139	235	TS127	barcode set	CAGL0I06138g	FAR1	YJL157C	CGGATATGTACTAATTGGGC	CCGCGTCTAGTATAGTATGT	TS_2	A	9	3	TEF1P-NAT1-TEF1T (based on pJK863)	HTL	Signal transduction
140	236	TS128	barcode set	CAGL0I07755g	HAL9	YOL089C	AATCGACTGTAAGTATCGCG	AACGTGGGATCACTCGTGCT	TS_2	A	11	1	TEF1P-NAT1-TEF1T (based on pJK863)	HTL	Transcriptional regulation
141	237	TS128	barcode set	CAGL0I07755g	HAL9	YOL089C	AATCGACTGTAAGTATCGCG	AACGTGGGATCACTCGTGCT	TS_2	A	11	2	TEF1P-NAT1-TEF1T (based on pJK863)	HTL	Transcriptional regulation
142	238	TS118	barcode set	CAGL0E03476g	CDC25	YLR310C	AAATTGGTCGTAATGCGTCG	TATGTCGGACGCCGTAGACT	TS_1	D	1	1	TEF1P-NAT1-TEF1T (based on pJK863)	HTL	Signal transduction
143	239	TS129	barcode set	CAGL0J11770g	PLB1	YMR008C	CGCGCAGAGGTTAGATAAAT	CTGTACGTGCGATACTCGTT	TS_2	C	1	1	TEF1P-NAT1-TEF1T (based on pJK863)	HTL	Cell wall organization
144	240	TS129	barcode set	CAGL0J11770g	PLB1	YMR008C	CGCGCAGAGGTTAGATAAAT	CTGTACGTGCGATACTCGTT	TS_2	C	1	2	TEF1P-NAT1-TEF1T (based on pJK863)	HTL	Cell wall organization
145	241	TS129	barcode set	CAGL0J11770g	PLB1	YMR008C	CGCGCAGAGGTTAGATAAAT	CTGTACGTGCGATACTCGTT	TS_2	C	1	3	TEF1P-NAT1-TEF1T (based on pJK863)	HTL	Cell wall organization
146	242	TS130	barcode set	CAGL0K00363g	STE6	YKL209C	CGACCCTGATGATCCTTTAT	GCCTATACCCAACTAATGGA	TS_2	C	2	1	TEF1P-NAT1-TEF1T (based on pJK863)	HTL	Other
147	243	TS130	barcode set	CAGL0K00363g	STE6	YKL209C	CGACCCTGATGATCCTTTAT	GCCTATACCCAACTAATGGA	TS_2	C	2	2	TEF1P-NAT1-TEF1T (based on pJK863)	HTL	Other
148	244	TS130	barcode set	CAGL0K00363g	STE6	YKL209C	CGACCCTGATGATCCTTTAT	GCCTATACCCAACTAATGGA	TS_2	C	2	3	TEF1P-NAT1-TEF1T (based on pJK863)	HTL	Other
149	245	TS131	barcode set	CAGL0K01331g	SIT4	YDL047W	CGGACGGTATTCATTCATCT	GCCGAACCTTCAACAGAGTA	TS_2	C	3	1	TEF1P-NAT1-TEF1T (based on pJK863)	HTL	Signal transduction
150	246	TS131	barcode set	CAGL0K01331g	SIT4	YDL047W	CGGACGGTATTCATTCATCT	GCCGAACCTTCAACAGAGTA	TS_2	C	3	2	TEF1P-NAT1-TEF1T (based on pJK863)	HTL	Signal transduction
151	247	TS131	barcode set	CAGL0K01331g	SIT4	YDL047W	CGGACGGTATTCATTCATCT	GCCGAACCTTCAACAGAGTA	TS_2	C	3	3	TEF1P-NAT1-TEF1T (based on pJK863)	HTL	Signal transduction
152	248	TS132	barcode set	CAGL0L01727g	DCW1	YKL046C	ACTAGATACACATGCGTGCC	ATTATCCTTAGGCGCGGCGT	TS_2	D	6	1	TEF1P-NAT1-TEF1T (based on pJK863)	HTL	Cell wall organization
153	249	TS132	barcode set	CAGL0L01727g	DCW1	YKL046C	ACTAGATACACATGCGTGCC	ATTATCCTTAGGCGCGGCGT	TS_2	D	6	2	TEF1P-NAT1-TEF1T (based on pJK863)	HTL	Cell wall organization
154	250	TS132	barcode set	CAGL0L01727g	DCW1	YKL046C	ACTAGATACACATGCGTGCC	ATTATCCTTAGGCGCGGCGT	TS_2	D	6	3	TEF1P-NAT1-TEF1T (based on pJK863)	HTL	Cell wall organization
155	251	TS133	barcode set	CAGL0L02761g	STE4	YOR212W	CAGAGTAAGTAACGGTTCGC	ATCGCGCAGGTCGGACATAT	TS_2	D	9	1	TEF1P-NAT1-TEF1T (based on pJK863)	HTL	Signal transduction
156	252	TS133	barcode set	CAGL0L02761g	STE4	YOR212W	CAGAGTAAGTAACGGTTCGC	ATCGCGCAGGTCGGACATAT	TS_2	D	9	2	TEF1P-NAT1-TEF1T (based on pJK863)	HTL	Signal transduction
157	253	TS133	barcode set	CAGL0L02761g	STE4	YOR212W	CAGAGTAAGTAACGGTTCGC	ATCGCGCAGGTCGGACATAT	TS_2	D	9	3	TEF1P-NAT1-TEF1T (based on pJK863)	HTL	Signal transduction
158	254	TS134	barcode set	CAGL0L03377g			CCGGCTAGTTAATTTGACTC	GGCTCCACTAAATAGACGCA	TS_2	D	10	4	TEF1P-NAT1-TEF1T (based on pJK863)	HTL	Other
159	255	TS135	barcode set	CAGL0L03674g		YJL103C	GGCTAACCGAAACCGTGACA	TCATAGCCAACACAGGGCGA	TS_2	D	11	4	TEF1P-NAT1-TEF1T (based on pJK863)	HTL	Transcriptional regulation
160	256	TS136	barcode set	CAGL0L04400g	YRR1	YOR162C	GGTGTACCTCCAACTTACTA	GCTCCTAGAGTATGAGAGAT	TS_2	D	12	1	TEF1P-NAT1-TEF1T (based on pJK863)	HTL	Transcriptional regulation
161	257	TS136	barcode set	CAGL0L04400g	YRR1	YOR162C	GGTGTACCTCCAACTTACTA	GCTCCTAGAGTATGAGAGAT	TS_2	D	12	2	TEF1P-NAT1-TEF1T (based on pJK863)	HTL	Transcriptional regulation
162	258	TS136	barcode set	CAGL0L04400g	YRR1	YOR162C	GGTGTACCTCCAACTTACTA	GCTCCTAGAGTATGAGAGAT	TS_2	D	12	3	TEF1P-NAT1-TEF1T (based on pJK863)	HTL	Transcriptional regulation
163	259	TS137	barcode set	CAGL0M08184g	STE3	YKL178C	TAAGAATCGTTAGCAAGGCC	CACGACGTAACATGAGGTCC	TS_2	G	5	2	TEF1P-NAT1-TEF1T (based on pJK863)	HTL	Signal transduction
164	260	TS137	barcode set	CAGL0M08184g	STE3	YKL178C	TAAGAATCGTTAGCAAGGCC	CACGACGTAACATGAGGTCC	TS_2	G	5	4	TEF1P-NAT1-TEF1T (based on pJK863)	HTL	Signal transduction
165	261	TS138	barcode set	CAGL0M09669g	RIM13	YMR154C	TTCACCGAGACAAGGCGAGA	AATAGGACGGAACGCCATCC	TS_2	G	9	1	TEF1P-NAT1-TEF1T (based on pJK863)	HTL	Other
166	262	TS138	barcode set	CAGL0M09669g	RIM13	YMR154C	TTCACCGAGACAAGGCGAGA	AATAGGACGGAACGCCATCC	TS_2	G	9	3	TEF1P-NAT1-TEF1T (based on pJK863)	HTL	Other
167	263	TS139	barcode set	CAGL0M11440g	CHA4	YLR098C	TACTGACGCGGGACTGACTT	CGGAGAGACAGATTACACGC	TS_2	G	11	4	TEF1P-NAT1-TEF1T (based on pJK863)	HTL	Transcriptional regulation
168	264	TS140	barcode set	CAGL0M11726g	CCW12	YLR110C	TAACTGCCGCGAGTCGTCTT	AGTATCACACGAGCTTACGC	TS_2	G	12	2	TEF1P-NAT1-TEF1T (based on pJK863)	HTL	Cell wall organization
169	265	TS141	barcode set	CAGL0M12298g	OAF1	YAL051W	ACGGACACGACAGTAGTTCC	CCAGGGCGTGTTCATAAATA	TS_2	H	2	1	TEF1P-NAT1-TEF1T (based on pJK863)	HTL	Transcriptional regulation
170	266	TS141	barcode set	CAGL0M12298g	OAF1	YAL051W	ACGGACACGACAGTAGTTCC	CCAGGGCGTGTTCATAAATA	TS_2	H	2	2	TEF1P-NAT1-TEF1T (based on pJK863)	HTL	Transcriptional regulation
171	267	TS141	barcode set	CAGL0M12298g	OAF1	YAL051W	ACGGACACGACAGTAGTTCC	CCAGGGCGTGTTCATAAATA	TS_2	H	2	3	TEF1P-NAT1-TEF1T (based on pJK863)	HTL	Transcriptional regulation
172	268	TS142	barcode set	CAGL0M05907g		YKR064W	GCCCACATGGATAACATTAC	CGTAATAAGTGGGTAGAACC	TS_2	G	1	1	TEF1P-NAT1-TEF1T (based on pJK863)	HTL	Transcriptional regulation
173	269	TS142	barcode set	CAGL0M05907g		YKR064W	GCCCACATGGATAACATTAC	CGTAATAAGTGGGTAGAACC	TS_2	G	1	2	TEF1P-NAT1-TEF1T (based on pJK863)	HTL	Transcriptional regulation
174	270	TS142	barcode set	CAGL0M05907g		YKR064W	GCCCACATGGATAACATTAC	CGTAATAAGTGGGTAGAACC	TS_2	G	1	3	TEF1P-NAT1-TEF1T (based on pJK863)	HTL	Transcriptional regulation
175	271	TS143	barcode set	CAGL0M06831g	CRZ1	YNL027W	AGACTAAGACCATTGTACCC	GGTAACACTATCTCAAGACC	TS_2	G	2	1	TEF1P-NAT1-TEF1T (based on pJK863)	HTL	Transcriptional regulation
176	272	TS143	barcode set	CAGL0M06831g	CRZ1	YNL027W	AGACTAAGACCATTGTACCC	GGTAACACTATCTCAAGACC	TS_2	G	2	2	TEF1P-NAT1-TEF1T (based on pJK863)	HTL	Transcriptional regulation
177	273	TS143	barcode set	CAGL0M06831g	CRZ1	YNL027W	AGACTAAGACCATTGTACCC	GGTAACACTATCTCAAGACC	TS_2	G	2	3	TEF1P-NAT1-TEF1T (based on pJK863)	HTL	Transcriptional regulation
178	274	TS144	barcode set	CAGL0M09207g	STE18	YJR086W	TGCGCGGTCAAACCAAGCAA	TAATCGCTACGAATGCTACC	TS_2	G	8	1	TEF1P-NAT1-TEF1T (based on pJK863)	HTL	Signal transduction
179	275	TS144	barcode set	CAGL0M09207g	STE18	YJR086W	TGCGCGGTCAAACCAAGCAA	TAATCGCTACGAATGCTACC	TS_2	G	8	2	TEF1P-NAT1-TEF1T (based on pJK863)	HTL	Signal transduction
180	276	TS144	barcode set	CAGL0M09207g	STE18	YJR086W	TGCGCGGTCAAACCAAGCAA	TAATCGCTACGAATGCTACC	TS_2	G	8	3	TEF1P-NAT1-TEF1T (based on pJK863)	HTL	Signal transduction
181	277	TS138	barcode set	CAGL0M09669g	RIM13	YMR154C	TTCACCGAGACAAGGCGAGA	AATAGGACGGAACGCCATCC	TS_2	G	9	2	TEF1P-NAT1-TEF1T (based on pJK863)	HTL	Other
182	278	TS139	barcode set	CAGL0M11440g	CHA4	YLR098C	TACTGACGCGGGACTGACTT	CGGAGAGACAGATTACACGC	TS_2	G	11	2	TEF1P-NAT1-TEF1T (based on pJK863)	HTL	Transcriptional regulation
183	279	TS139	barcode set	CAGL0M11440g	CHA4	YLR098C	TACTGACGCGGGACTGACTT	CGGAGAGACAGATTACACGC	TS_2	G	11	3	TEF1P-NAT1-TEF1T (based on pJK863)	HTL	Transcriptional regulation
184	280	TS140	barcode set	CAGL0M11726g	CCW12	YLR110C	TAACTGCCGCGAGTCGTCTT	AGTATCACACGAGCTTACGC	TS_2	G	12	3	TEF1P-NAT1-TEF1T (based on pJK863)	HTL	Cell wall organization
185	281	TS145	barcode set	CAGL0G01386g	SLM1	YIL105C	GCGGCGGATATGCTATAAAT	AATAGAGACGGCTCGATCTG	TS_1	F	9	1	TEF1P-NAT1-TEF1T (based on pJK863)	HTL	Signal transduction
186	282	TS145	barcode set	CAGL0G01386g	SLM1	YIL105C	GCGGCGGATATGCTATAAAT	AATAGAGACGGCTCGATCTG	TS_1	F	9	2	TEF1P-NAT1-TEF1T (based on pJK863)	HTL	Signal transduction
187	283	TS145	barcode set	CAGL0G01386g	SLM1	YIL105C	GCGGCGGATATGCTATAAAT	AATAGAGACGGCTCGATCTG	TS_1	F	9	3	TEF1P-NAT1-TEF1T (based on pJK863)	HTL	Signal transduction
188	284	TS146	barcode set	CAGL0F08833g	MSB2	YGR014W	ATATACGTGGAATGACTGGC	TGACTCCTACGAGGTGCGAT	TS_1	F	3	2	TEF1P-NAT1-TEF1T (based on pJK863)	HTL	Cell wall organization
189	285	TS147	barcode set	CAGL0G00242g	YOR1	YGR281W	TGGATTCGACTCGCTCGCAT	CATTACGTCAGATAGGGCTG	TS_1	F	6	1	TEF1P-NAT1-TEF1T (based on pJK863)	HTL	Transport
190	286	TS148	barcode set	CAGL0L01727g	DCW1	YKL046C	ACTAGATACACATGCGTGCC	ATTATCCTTAGGCGCGGCGT	TS_2	D	6	4	TEF1P-NAT1-TEF1T (based on pJK863)	HTL	Cell wall organization
191	287	TS149	barcode set	CAGL0K02673g	STE20	YHL007C	GTGCGAACCAACGTACTACA	GGTCGATAATAACACGCCAC	TS_2	C	5	1	TEF1P-NAT1-TEF1T (based on pJK863)	HTL	Signal transduction
192	288	TS149	barcode set	CAGL0K02673g	STE20	YHL007C	GTGCGAACCAACGTACTACA	GGTCGATAATAACACGCCAC	TS_2	C	5	2	TEF1P-NAT1-TEF1T (based on pJK863)	HTL	Signal transduction
193	289	TS149	barcode set	CAGL0K02673g	STE20	YHL007C	GTGCGAACCAACGTACTACA	GGTCGATAATAACACGCCAC	TS_2	C	5	3	TEF1P-NAT1-TEF1T (based on pJK863)	HTL	Signal transduction
194	290	TS150	barcode set	CAGL0I08503g	MET16	YPR167C	GTGAGCGAAACACCGCGTAA	GCGTGTGAATAATACGGAAC	TS_2	B	2	1	TEF1P-NAT1-TEF1T (based on pJK863)	HTL	Other
195	291	TS150	barcode set	CAGL0I08503g	MET16	YPR167C	GTGAGCGAAACACCGCGTAA	GCGTGTGAATAATACGGAAC	TS_2	B	2	2	TEF1P-NAT1-TEF1T (based on pJK863)	HTL	Other
196	292	TS150	barcode set	CAGL0I08503g	MET16	YPR167C	GTGAGCGAAACACCGCGTAA	GCGTGTGAATAATACGGAAC	TS_2	B	2	3	TEF1P-NAT1-TEF1T (based on pJK863)	HTL	Other
197	293	TS151	barcode set	CAGL0I09416g		YBR270C	GTGCGAACCAACGTACTACA	GGTCGATAATAACACGCCAC	TS_2	B	3	1	TEF1P-NAT1-TEF1T (based on pJK863)	HTL	Other
198	294	TS152	barcode set	CAGL0J04290g	FUS3	YBL016W	GCTAATCGCTAATTCGTTCC	GCGACCCTATAATTCTTGAC	TS_2	B	5	1	TEF1P-NAT1-TEF1T (based on pJK863)	HTL	Signal transduction
199	295	TS152	barcode set	CAGL0J04290g	FUS3	YBL016W	GCTAATCGCTAATTCGTTCC	GCGACCCTATAATTCTTGAC	TS_2	B	5	2	TEF1P-NAT1-TEF1T (based on pJK863)	HTL	Signal transduction
200	296	TS153	barcode set	CAGL0J11308g	NPR1	YNL183C	CGGATATGTACTAATTGGGC	CCGCGTCTAGTATAGTATGT	TS_2	B	10	1	TEF1P-NAT1-TEF1T (based on pJK863)	HTL	Transport
201	297	TS153	barcode set	CAGL0J11308g	NPR1	YNL183C	CGGATATGTACTAATTGGGC	CCGCGTCTAGTATAGTATGT	TS_2	B	10	2	TEF1P-NAT1-TEF1T (based on pJK863)	HTL	Transport
202	298	TS153	barcode set	CAGL0J11308g	NPR1	YNL183C	CGGATATGTACTAATTGGGC	CCGCGTCTAGTATAGTATGT	TS_2	B	10	3	TEF1P-NAT1-TEF1T (based on pJK863)	HTL	Transport
203	299	TS154	barcode set	CAGL0J00253g	MTL1	YGR023W	ATAGCCTTCTAAGAGCGGCG	AATCGGCGCTCACGCTTAGT	TS_3	A	12	1	TEF1P-NAT1-TEF1T (based on pJK863)	HTL	Signal transduction
204	300	TS154	barcode set	CAGL0J00253g	MTL1	YGR023W	ATAGCCTTCTAAGAGCGGCG	AATCGGCGCTCACGCTTAGT	TS_3	A	12	2	TEF1P-NAT1-TEF1T (based on pJK863)	HTL	Signal transduction
205	301	TS154	barcode set	CAGL0J00253g	MTL1	YGR023W	ATAGCCTTCTAAGAGCGGCG	AATCGGCGCTCACGCTTAGT	TS_3	A	12	3	TEF1P-NAT1-TEF1T (based on pJK863)	HTL	Signal transduction
206	302	TS155	barcode set	CAGL0K04169g	KSS1	YGR040W	AAGCATCGTTAAGGCTGCCG	ATTGGTCAGCGAGCCCTACT	TS_3	A	9	1	TEF1P-NAT1-TEF1T (based on pJK863)	HTL	Signal transduction
207	303	TS155	barcode set	CAGL0K04169g	KSS1	YGR040W	AAGCATCGTTAAGGCTGCCG	ATTGGTCAGCGAGCCCTACT	TS_3	A	9	2	TEF1P-NAT1-TEF1T (based on pJK863)	HTL	Signal transduction
208	304	TS155	barcode set	CAGL0K04169g	KSS1	YGR040W	AAGCATCGTTAAGGCTGCCG	ATTGGTCAGCGAGCCCTACT	TS_3	A	9	3	TEF1P-NAT1-TEF1T (based on pJK863)	HTL	Signal transduction
209	305	TS156	barcode set	CAGL0L06336g	STE5	YDR103W	AATCGACTGTAAGTATCGCG	AACGTGGGATCACTCGTGCT	TS_3	A	11	1	TEF1P-NAT1-TEF1T (based on pJK863)	HTL	Signal transduction
210	306	TS156	barcode set	CAGL0L06336g	STE5	YDR103W	AATCGACTGTAAGTATCGCG	AACGTGGGATCACTCGTGCT	TS_3	A	11	2	TEF1P-NAT1-TEF1T (based on pJK863)	HTL	Signal transduction
211	307	TS157	barcode set	CAGL0K06479g	PKH3	YDR466W	GCTAATCGCTAATTCGTTCC	GCGACCCTATAATTCTTGAC	TS_2	C	7	1	TEF1P-NAT1-TEF1T (based on pJK863)	HTL	Cell wall organization
212	308	TS157	barcode set	CAGL0K06479g	PKH3	YDR466W	GCTAATCGCTAATTCGTTCC	GCGACCCTATAATTCTTGAC	TS_2	C	7	2	TEF1P-NAT1-TEF1T (based on pJK863)	HTL	Cell wall organization
213	309	TS157	barcode set	CAGL0K06479g	PKH3	YDR466W	GCTAATCGCTAATTCGTTCC	GCGACCCTATAATTCTTGAC	TS_2	C	7	3	TEF1P-NAT1-TEF1T (based on pJK863)	HTL	Cell wall organization
214	310	TS158	barcode set	CAGL0L03377g	SIP4	YJL089W	CCGGCTAGTTAATTTGACTC	GGCTCCACTAAATAGACGCA	TS_2	D	10	1	TEF1P-NAT1-TEF1T (based on pJK863)	HTL	Transcriptional regulation
215	311	TS158	barcode set	CAGL0L03377g	SIP4	YJL089W	CCGGCTAGTTAATTTGACTC	GGCTCCACTAAATAGACGCA	TS_2	D	10	2	TEF1P-NAT1-TEF1T (based on pJK863)	HTL	Transcriptional regulation
216	312	TS158	barcode set	CAGL0L03377g	SIP4	YJL089W	CCGGCTAGTTAATTTGACTC	GGCTCCACTAAATAGACGCA	TS_2	D	10	3	TEF1P-NAT1-TEF1T (based on pJK863)	HTL	Transcriptional regulation
217	313	TS159	barcode set	CAGL0K06985g		YBR239C	GCATTAACGGGAACTAGAGC	GTTAGGTCCATCCGCCATTG	TS_2	C	8	2	TEF1P-NAT1-TEF1T (based on pJK863)	HTL	Transcriptional regulation
218	314	TS159	barcode set	CAGL0K06985g		YBR239C	GCATTAACGGGAACTAGAGC	GTTAGGTCCATCCGCCATTG	TS_2	C	8	3	TEF1P-NAT1-TEF1T (based on pJK863)	HTL	Transcriptional regulation
219	315	TS160	barcode set	CAGL0L03674g		YJL103C	GGCTAACCGAAACCGTGACA	TCATAGCCAACACAGGGCGA	TS_2	D	11	1	TEF1P-NAT1-TEF1T (based on pJK863)	HTL	Transcriptional regulation
220	316	TS160	barcode set	CAGL0L03674g		YJL103C	GGCTAACCGAAACCGTGACA	TCATAGCCAACACAGGGCGA	TS_2	D	11	2	TEF1P-NAT1-TEF1T (based on pJK863)	HTL	Transcriptional regulation
221	317	TS160	barcode set	CAGL0L03674g		YJL103C	GGCTAACCGAAACCGTGACA	TCATAGCCAACACAGGGCGA	TS_2	D	11	3	TEF1P-NAT1-TEF1T (based on pJK863)	HTL	Transcriptional regulation
222	318	TS161	barcode set	CAGL0M04191g	YPS1	YLR120C	GCGGCGGATATGCTATAAAT	AATAGAGACGGCTCGATCTG	TS_2	F	9	1	TEF1P-NAT1-TEF1T (based on pJK863)	HTL	Cell wall organization
223	319	TS161	barcode set	CAGL0M04191g	YPS1	YLR120C	GCGGCGGATATGCTATAAAT	AATAGAGACGGCTCGATCTG	TS_2	F	9	2	TEF1P-NAT1-TEF1T (based on pJK863)	HTL	Cell wall organization
224	320	TS161	barcode set	CAGL0M04191g	YPS1	YLR120C	GCGGCGGATATGCTATAAAT	AATAGAGACGGCTCGATCTG	TS_2	F	9	3	TEF1P-NAT1-TEF1T (based on pJK863)	HTL	Cell wall organization
225	321	TS162	barcode set	CAGL0M04565g	ACF2	YLR144C	TACTCGGCAACAGGTCGGTA	ATTCTCGATAGAGCGTGCTG	TS_1	F	10	1	TEF1P-NAT1-TEF1T (based on pJK863)	HTL	Cell wall organization
226	322	TS162	barcode set	CAGL0M04565g	ACF2	YLR144C	TACTCGGCAACAGGTCGGTA	ATTCTCGATAGAGCGTGCTG	TS_1	F	10	2	TEF1P-NAT1-TEF1T (based on pJK863)	HTL	Cell wall organization
227	323	TS162	barcode set	CAGL0M04565g	ACF2	YLR144C	TACTCGGCAACAGGTCGGTA	ATTCTCGATAGAGCGTGCTG	TS_1	F	10	3	TEF1P-NAT1-TEF1T (based on pJK863)	HTL	Cell wall organization
228	324	TS163	barcode set	CAGL0L07656g	GLO1	YML004C	TTACTTGCCCGAGCCGGATT	CACCCGAGTTACGATCAAAT	TS_2	E	4	1	TEF1P-NAT1-TEF1T (based on pJK863)	HTL	Other
229	325	TS163	barcode set	CAGL0L07656g	GLO1	YML004C	TTACTTGCCCGAGCCGGATT	CACCCGAGTTACGATCAAAT	TS_2	E	4	2	TEF1P-NAT1-TEF1T (based on pJK863)	HTL	Other
230	326	TS163	barcode set	CAGL0L07656g	GLO1	YML004C	TTACTTGCCCGAGCCGGATT	CACCCGAGTTACGATCAAAT	TS_2	E	4	3	TEF1P-NAT1-TEF1T (based on pJK863)	HTL	Other
231	327	TS164	barcode set	CAGL0L04576g	YRR1	YOR162C	TAGTGACTTAGACCCTCCGT	ATTGCGACCTCGTCATGGCT	TS_2	E	1	1	TEF1P-NAT1-TEF1T (based on pJK863)	HTL	Transcriptional regulation
232	328	TS164	barcode set	CAGL0L04576g	YRR1	YOR162C	TAGTGACTTAGACCCTCCGT	ATTGCGACCTCGTCATGGCT	TS_2	E	1	2	TEF1P-NAT1-TEF1T (based on pJK863)	HTL	Transcriptional regulation
233	329	TS164	barcode set	CAGL0L04576g	YRR1	YOR162C	TAGTGACTTAGACCCTCCGT	ATTGCGACCTCGTCATGGCT	TS_2	E	1	3	TEF1P-NAT1-TEF1T (based on pJK863)	HTL	Transcriptional regulation
234	330	TS165	barcode set	CAGL0L05632g	PBS2	YJL128C	TATAGTTCGGGCCATACGGT	GGTATTCCATAATCGCTCTC	TS_2	E	2	1	TEF1P-NAT1-TEF1T (based on pJK863)	HTL	Signal transduction
235	331	TS165	barcode set	CAGL0L05632g	PBS2	YJL128C	TATAGTTCGGGCCATACGGT	GGTATTCCATAATCGCTCTC	TS_2	E	2	2	TEF1P-NAT1-TEF1T (based on pJK863)	HTL	Signal transduction
236	332	TS165	barcode set	CAGL0L05632g	PBS2	YJL128C	TATAGTTCGGGCCATACGGT	GGTATTCCATAATCGCTCTC	TS_2	E	2	3	TEF1P-NAT1-TEF1T (based on pJK863)	HTL	Signal transduction
237	333	TS166	barcode set	CAGL0L07744g	ADP1	YCR011C	TATTAGTGCGGACCCGGCTT	CGGGAGGATTTATACTCAGT	TS_2	E	5	1	TEF1P-NAT1-TEF1T (based on pJK863)	HTL	Other
238	334	TS166	barcode set	CAGL0L07744g	ADP1	YCR011C	TATTAGTGCGGACCCGGCTT	CGGGAGGATTTATACTCAGT	TS_2	E	5	2	TEF1P-NAT1-TEF1T (based on pJK863)	HTL	Other
239	335	TS166	barcode set	CAGL0L07744g	ADP1	YCR011C	TATTAGTGCGGACCCGGCTT	CGGGAGGATTTATACTCAGT	TS_2	E	5	3	TEF1P-NAT1-TEF1T (based on pJK863)	HTL	Other
240	336	TS167	barcode set	CAGL0L09691g	PUT3	YKL015W	TTCTACCGTCGGAGGCAGTT	TTACGACCAGAACGGGACAC	TS_2	E	6	1	TEF1P-NAT1-TEF1T (based on pJK863)	HTL	Transcriptional regulation
241	337	TS167	barcode set	CAGL0L09691g	PUT3	YKL015W	TTCTACCGTCGGAGGCAGTT	TTACGACCAGAACGGGACAC	TS_2	E	6	2	TEF1P-NAT1-TEF1T (based on pJK863)	HTL	Transcriptional regulation
242	338	TS167	barcode set	CAGL0L09691g	PUT3	YKL015W	TTCTACCGTCGGAGGCAGTT	TTACGACCAGAACGGGACAC	TS_2	E	6	3	TEF1P-NAT1-TEF1T (based on pJK863)	HTL	Transcriptional regulation
243	339	TS168	barcode set	CAGL0L10956g	RIM20	YOR275C	TTTAGTGTCCGCGCCACGTT	TATACTTGCGTAACGGGCCG	TS_2	E	7	1	TEF1P-NAT1-TEF1T (based on pJK863)	HTL	Other
244	340	TS168	barcode set	CAGL0L10956g	RIM20	YOR275C	TTTAGTGTCCGCGCCACGTT	TATACTTGCGTAACGGGCCG	TS_2	E	7	2	TEF1P-NAT1-TEF1T (based on pJK863)	HTL	Other
245	341	TS168	barcode set	CAGL0L10956g	RIM20	YOR275C	TTTAGTGTCCGCGCCACGTT	TATACTTGCGTAACGGGCCG	TS_2	E	7	3	TEF1P-NAT1-TEF1T (based on pJK863)	HTL	Other
246	342	TS169	barcode set	CAGL0L12056g	BMH1	YER177W	AATCGGTACTAAGTCGGTTC	CGGGTGTAGAAACCGACTAA	TS_2	E	9	1	TEF1P-NAT1-TEF1T (based on pJK863)	HTL	Other
247	343	TS169	barcode set	CAGL0L12056g	BMH1	YER177W	AATCGGTACTAAGTCGGTTC	CGGGTGTAGAAACCGACTAA	TS_2	E	9	2	TEF1P-NAT1-TEF1T (based on pJK863)	HTL	Other
248	344	TS169	barcode set	CAGL0L12056g	BMH1	YER177W	AATCGGTACTAAGTCGGTTC	CGGGTGTAGAAACCGACTAA	TS_2	E	9	3	TEF1P-NAT1-TEF1T (based on pJK863)	HTL	Other
249	345	TS170	barcode set	CAGL0M02387g	PXA1	YPL147W	ATATAGCGTGACAGAGTACG	AAGTCAGGTCAATCATGCCC	TS_2	F	2	1	TEF1P-NAT1-TEF1T (based on pJK863)	HTL	Transport
250	346	TS170	barcode set	CAGL0M02387g	PXA1	YPL147W	ATATAGCGTGACAGAGTACG	AAGTCAGGTCAATCATGCCC	TS_2	F	2	2	TEF1P-NAT1-TEF1T (based on pJK863)	HTL	Transport
251	347	TS171	barcode set	CAGL0M02651g	RDS2	YPL133C	ATATACGTGGAATGACTGGC	TGACTCCTACGAGGTGCGAT	TS_2	F	3	1	TEF1P-NAT1-TEF1T (based on pJK863)	HTL	Transcriptional regulation
252	348	TS171	barcode set	CAGL0M02651g	RDS2	YPL133C	ATATACGTGGAATGACTGGC	TGACTCCTACGAGGTGCGAT	TS_2	F	3	2	TEF1P-NAT1-TEF1T (based on pJK863)	HTL	Transcriptional regulation
253	349	TS171	barcode set	CAGL0M02651g	RDS2	YPL133C	ATATACGTGGAATGACTGGC	TGACTCCTACGAGGTGCGAT	TS_2	F	3	3	TEF1P-NAT1-TEF1T (based on pJK863)	HTL	Transcriptional regulation
254	350	TS172	barcode set	CAGL0M03025g	CAT8	YMR280C	ACATGGTTGAAAGCGCGTCA	TATGACTGCGGACGTTCGCT	TS_2	F	4	1	TEF1P-NAT1-TEF1T (based on pJK863)	HTL	Transcriptional regulation
255	351	TS173	barcode set	CAGL0M03773g	TOS6	YNL300W	ATTTCGGCACGCTCACGATG	TAACGCGACAGACGATATGC	TS_2	F	7	1	TEF1P-NAT1-TEF1T (based on pJK863)	HTL	Cell wall organization
256	352	TS173	barcode set	CAGL0M03773g	TOS6	YNL300W	ATTTCGGCACGCTCACGATG	TAACGCGACAGACGATATGC	TS_2	F	7	2	TEF1P-NAT1-TEF1T (based on pJK863)	HTL	Cell wall organization
257	353	TS173	barcode set	CAGL0M03773g	TOS6	YNL300W	ATTTCGGCACGCTCACGATG	TAACGCGACAGACGATATGC	TS_2	F	7	3	TEF1P-NAT1-TEF1T (based on pJK863)	HTL	Cell wall organization
258	354	TS174	barcode set	CAGL0M03663g	RIM21	YNL294C	TGGATTCGACTCGCTCGCAT	CATTACGTCAGATAGGGCTG	TS_2	F	6	1	TEF1P-NAT1-TEF1T (based on pJK863)	HTL	Other
259	355	TS174	barcode set	CAGL0M03663g	RIM21	YNL294C	TGGATTCGACTCGCTCGCAT	CATTACGTCAGATAGGGCTG	TS_2	F	6	2	TEF1P-NAT1-TEF1T (based on pJK863)	HTL	Other
260	356	TS174	barcode set	CAGL0M03663g	RIM21	YNL294C	TGGATTCGACTCGCTCGCAT	CATTACGTCAGATAGGGCTG	TS_2	F	6	3	TEF1P-NAT1-TEF1T (based on pJK863)	HTL	Other
261	357	TS175	barcode set	CAGL0M04169g	KRE1	YNL322C	GAGCTTGACTCACCGTCTTG	TAACTCGTACTAGCGATCTG	TS_2	F	8	1	TEF1P-NAT1-TEF1T (based on pJK863)	HTL	Cell wall organization
262	358	TS175	barcode set	CAGL0M04169g	KRE1	YNL322C	GAGCTTGACTCACCGTCTTG	TAACTCGTACTAGCGATCTG	TS_2	F	8	2	TEF1P-NAT1-TEF1T (based on pJK863)	HTL	Cell wall organization
263	359	TS175	barcode set	CAGL0M04169g	KRE1	YNL322C	GAGCTTGACTCACCGTCTTG	TAACTCGTACTAGCGATCTG	TS_2	F	8	3	TEF1P-NAT1-TEF1T (based on pJK863)	HTL	Cell wall organization
264	360	TS176	barcode set	CAGL0M01826g	ECM33	YBR078W	AGCATGTCTCTAACTGGACG	TCTATTCGGCGAGGCTGACT	TS_2	F	1	1	TEF1P-NAT1-TEF1T (based on pJK863)	HTL	Cell wall organization
265	361	TS176	barcode set	CAGL0M01826g	ECM33	YBR078W	AGCATGTCTCTAACTGGACG	TCTATTCGGCGAGGCTGACT	TS_2	F	1	2	TEF1P-NAT1-TEF1T (based on pJK863)	HTL	Cell wall organization
266	362	TS176	barcode set	CAGL0M01826g	ECM33	YBR078W	AGCATGTCTCTAACTGGACG	TCTATTCGGCGAGGCTGACT	TS_2	F	1	3	TEF1P-NAT1-TEF1T (based on pJK863)	HTL	Cell wall organization
267	363	TS177	barcode set	CAGL0K11902g	LYS14	YDR034C	AAATTGGTCGTAATGCGTCG	TATGTCGGACGCCGTAGACT	TS_2	D	1	1	TEF1P-NAT1-TEF1T (based on pJK863)	HTL	Transcriptional regulation
268	364	TS177	barcode set	CAGL0K11902g	LYS14	YDR034C	AAATTGGTCGTAATGCGTCG	TATGTCGGACGCCGTAGACT	TS_2	D	1	2	TEF1P-NAT1-TEF1T (based on pJK863)	HTL	Transcriptional regulation
269	365	TS177	barcode set	CAGL0K11902g	LYS14	YDR034C	AAATTGGTCGTAATGCGTCG	TATGTCGGACGCCGTAGACT	TS_2	D	1	3	TEF1P-NAT1-TEF1T (based on pJK863)	HTL	Transcriptional regulation
270	366	TS178	barcode set	CAGL0L00605g	CNB1	YKL190W	ACCGACGGCTTAGCGATCTT	ACCCGAGCGTTGATAATTCT	TS_2	D	5	1	TEF1P-NAT1-TEF1T (based on pJK863)	HTL	Signal transduction
271	367	TS178	barcode set	CAGL0L00605g	CNB1	YKL190W	ACCGACGGCTTAGCGATCTT	ACCCGAGCGTTGATAATTCT	TS_2	D	5	2	TEF1P-NAT1-TEF1T (based on pJK863)	HTL	Signal transduction
272	368	TS178	barcode set	CAGL0L00605g	CNB1	YKL190W	ACCGACGGCTTAGCGATCTT	ACCCGAGCGTTGATAATTCT	TS_2	D	5	3	TEF1P-NAT1-TEF1T (based on pJK863)	HTL	Signal transduction
273	369	TS132	barcode set	CAGL0L01727g	DCW1	YKL046C	ACTAGATACACATGCGTGCC	ATTATCCTTAGGCGCGGCGT	TS_2	D	6	5	TEF1P-NAT1-TEF1T (based on pJK863)	HTL	Cell wall organization
274	370	TS132	barcode set	CAGL0L01727g	DCW1	YKL046C	ACTAGATACACATGCGTGCC	ATTATCCTTAGGCGCGGCGT	TS_2	D	6	6	TEF1P-NAT1-TEF1T (based on pJK863)	HTL	Cell wall organization
275	371	TS132	barcode set	CAGL0L01727g	DCW1	YKL046C	ACTAGATACACATGCGTGCC	ATTATCCTTAGGCGCGGCGT	TS_2	D	6	7	TEF1P-NAT1-TEF1T (based on pJK863)	HTL	Cell wall organization
276	372	TS133	barcode set	CAGL0L02761g	STE4	YOR212W	CAGAGTAAGTAACGGTTCGC	ATCGCGCAGGTCGGACATAT	TS_2	D	9	4	TEF1P-NAT1-TEF1T (based on pJK863)	HTL	Signal transduction
277	373	TS133	barcode set	CAGL0L02761g	STE4	YOR212W	CAGAGTAAGTAACGGTTCGC	ATCGCGCAGGTCGGACATAT	TS_2	D	9	5	TEF1P-NAT1-TEF1T (based on pJK863)	HTL	Signal transduction
278	374	TS133	barcode set	CAGL0L02761g	STE4	YOR212W	CAGAGTAAGTAACGGTTCGC	ATCGCGCAGGTCGGACATAT	TS_2	D	9	6	TEF1P-NAT1-TEF1T (based on pJK863)	HTL	Signal transduction
279	375	TS179	barcode set	CAGL0K12430g	STE2	YFL026W	ATTACCTAGTCGGAGACAGG	TATCAGTTCCGCAGACGGGT	TS_2	D	3	1	TEF1P-NAT1-TEF1T (based on pJK863)	HTL	Signal transduction
280	376	TS179	barcode set	CAGL0K12430g	STE2	YFL026W	ATTACCTAGTCGGAGACAGG	TATCAGTTCCGCAGACGGGT	TS_2	D	3	2	TEF1P-NAT1-TEF1T (based on pJK863)	HTL	Signal transduction
281	377	TS180	barcode set	CAGL0K10164g	SED1	YDR077W	GATTATACGCTATCCGAGGT	GACTCCGTACTCACTAGGAT	TS_2	C	10	2	TEF1P-NAT1-TEF1T (based on pJK863)	HTL	Cell wall organization
282	378	TS180	barcode set	CAGL0K10164g	SED1	YDR077W	GATTATACGCTATCCGAGGT	GACTCCGTACTCACTAGGAT	TS_2	C	10	3	TEF1P-NAT1-TEF1T (based on pJK863)	HTL	Cell wall organization
283	379	TS181	barcode set	CAGL0K10868g	CTA1	YDR256C	TAATACCCGATCACTGGTGG	TACACTCGACGACACGGTAG	TS_2	C	12	4	TEF1P-NAT1-TEF1T (based on pJK863)	HTL	Other
284	380	TS182	barcode set	CAGL0L01771g	SOK2	YMR016C	CCGACCGTATAAGTTCTATC	AATTCGTATGCACCGGGCGT	TS_2	D	7	2	TEF1P-NAT1-TEF1T (based on pJK863)	HTL	Transcriptional regulation
285	381	TS183	barcode set	CAGL0M04191g	YPS1	YLR120C	GCGGCGGATATGCTATAAAT	AATAGAGACGGCTCGATCTG	TS_2	F	9	4	TEF1P-NAT1-TEF1T (based on pJK863)	HTL	Cell wall organization
286	382	TS184	barcode set	CAGL0M13849g	GAS1	YMR307W	AAGCCAAACGAACTTGCGGC	ATACCTTACTCAGCGGGTGG	TS_2	H	4	1	TEF1P-NAT1-TEF1T (based on pJK863)	HTL	Cell wall organization
287	383	TS184	barcode set	CAGL0M13849g	GAS1	YMR307W	AAGCCAAACGAACTTGCGGC	ATACCTTACTCAGCGGGTGG	TS_2	H	4	2	TEF1P-NAT1-TEF1T (based on pJK863)	HTL	Cell wall organization
288	384	TS184	barcode set	CAGL0M13849g	GAS1	YMR307W	AAGCCAAACGAACTTGCGGC	ATACCTTACTCAGCGGGTGG	TS_2	H	4	3	TEF1P-NAT1-TEF1T (based on pJK863)	HTL	Cell wall organization
289	385	TS185	barcode set	CAGL0I10945g	MCA1	YOR197W	CCGAGTTAGGAATGTTATGC	TACGGAATTCGTACGTGCTC	TS_2	H	5	3	TEF1P-NAT1-TEF1T (based on pJK863)	HTL	Other
290	386	TS185	barcode set	CAGL0I10945g	MCA1	YOR197W	CCGAGTTAGGAATGTTATGC	TACGGAATTCGTACGTGCTC	TS_2	H	5	4	TEF1P-NAT1-TEF1T (based on pJK863)	HTL	Other
291	387	TS185	barcode set	CAGL0I10945g	MCA1	YOR197W	CCGAGTTAGGAATGTTATGC	TACGGAATTCGTACGTGCTC	TS_2	H	5	6	TEF1P-NAT1-TEF1T (based on pJK863)	HTL	Other
292	388	TS186	barcode set	CAGL0L11110g	CNA1	YLR433C	TATTCTCCGTGACGCGGGTT	AATTTAGGTGCGACCGCCCT	TS_2	E	8	1	TEF1P-NAT1-TEF1T (based on pJK863)	HTL	Signal transduction
293	389	TS186	barcode set	CAGL0L11110g	CNA1	YLR433C	TATTCTCCGTGACGCGGGTT	AATTTAGGTGCGACCGCCCT	TS_2	E	8	2	TEF1P-NAT1-TEF1T (based on pJK863)	HTL	Signal transduction
294	390	TS186	barcode set	CAGL0L11110g	CNA1	YLR433C	TATTCTCCGTGACGCGGGTT	AATTTAGGTGCGACCGCCCT	TS_2	E	8	3	TEF1P-NAT1-TEF1T (based on pJK863)	HTL	Signal transduction
295	391	TS187	barcode set	CAGL0M04565g	ACF2	YLR144C	TACTCGGCAACAGGTCGGTA	ATTCTCGATAGAGCGTGCTG	TS_2	F	10	1	TEF1P-NAT1-TEF1T (based on pJK863)	HTL	Cell wall organization
296	392	TS187	barcode set	CAGL0M04565g	ACF2	YLR144C	TACTCGGCAACAGGTCGGTA	ATTCTCGATAGAGCGTGCTG	TS_2	F	10	2	TEF1P-NAT1-TEF1T (based on pJK863)	HTL	Cell wall organization
297	393	TS187	barcode set	CAGL0M04565g	ACF2	YLR144C	TACTCGGCAACAGGTCGGTA	ATTCTCGATAGAGCGTGCTG	TS_2	F	10	3	TEF1P-NAT1-TEF1T (based on pJK863)	HTL	Cell wall organization
298	394	TS188	barcode set	CAGL0L01771g	SOK2	YMR016C	CCGACCGTATAAGTTCTATC	AATTCGTATGCACCGGGCGT	TS_2	D	7	1	TEF1P-NAT1-TEF1T (based on pJK863)	HTL	Transcriptional regulation
299	395	TS157	barcode set	CAGL0K06479g	PKH3	YDR466W	GCTAATCGCTAATTCGTTCC	GCGACCCTATAATTCTTGAC	TS_2	C	7	1	TEF1P-NAT1-TEF1T (based on pJK863)	HTL	Cell wall organization
300	396	TS157	barcode set	CAGL0K06479g	PKH3	YDR466W	GCTAATCGCTAATTCGTTCC	GCGACCCTATAATTCTTGAC	TS_2	C	7	2	TEF1P-NAT1-TEF1T (based on pJK863)	HTL	Cell wall organization
301	397	TS189	barcode set	CAGL0F08371g	TNA1	YGR260W	CCTAGAGACGTAGATATGCG	ATACACATCGGGTTAAGCGG	TS_2	H	8	1	TEF1P-NAT1-TEF1T (based on pJK863)	HTL	Transport
302	398	TS181	barcode set	CAGL0K10868g	CTA1	YDR256C	TAATACCCGATCACTGGTGG	TACACTCGACGACACGGTAG	TS_2	C	12	1	TEF1P-NAT1-TEF1T (based on pJK863)	HTL	Other
303	399	TS181	barcode set	CAGL0K10868g	CTA1	YDR256C	TAATACCCGATCACTGGTGG	TACACTCGACGACACGGTAG	TS_2	C	12	2	TEF1P-NAT1-TEF1T (based on pJK863)	HTL	Other
304	400	TS181	barcode set	CAGL0K10868g	CTA1	YDR256C	TAATACCCGATCACTGGTGG	TACACTCGACGACACGGTAG	TS_2	C	12	3	TEF1P-NAT1-TEF1T (based on pJK863)	HTL	Other
305	401	TS190	barcode set	CAGL0L12782g	DIG1	YPL049C	CCCGATTGGTTAATACCGAT	AAGAAGGTTTAATTCGCCCG	TS_2	E	10	1	TEF1P-NAT1-TEF1T (based on pJK863)	HTL	Transcriptional regulation
306	402	TS190	barcode set	CAGL0L12782g	DIG1	YPL049C	CCCGATTGGTTAATACCGAT	AAGAAGGTTTAATTCGCCCG	TS_2	E	10	2	TEF1P-NAT1-TEF1T (based on pJK863)	HTL	Transcriptional regulation
307	403	TS190	barcode set	CAGL0L12782g	DIG1	YPL049C	CCCGATTGGTTAATACCGAT	AAGAAGGTTTAATTCGCCCG	TS_2	E	10	3	TEF1P-NAT1-TEF1T (based on pJK863)	HTL	Transcriptional regulation
308	404	TS191	barcode set	CAGL0M01760g	PDR5	YOR153W	GCGCTGCAATCAGAAAGGTA	CCAATGTACGCCAAGGTATA	TS_2	E	12	1	TEF1P-NAT1-TEF1T (based on pJK863)	HTL	Transport
309	405	TS191	barcode set	CAGL0M01760g	PDR5	YOR153W	GCGCTGCAATCAGAAAGGTA	CCAATGTACGCCAAGGTATA	TS_2	E	12	2	TEF1P-NAT1-TEF1T (based on pJK863)	HTL	Transport
310	406	TS135	barcode set	CAGL0L03674g		YJL103C	GGCTAACCGAAACCGTGACA	TCATAGCCAACACAGGGCGA	TS_2	D	11	1	TEF1P-NAT1-TEF1T (based on pJK863)	HTL	Transcriptional regulation
311	407	TS135	barcode set	CAGL0L03674g		YJL103C	GGCTAACCGAAACCGTGACA	TCATAGCCAACACAGGGCGA	TS_2	D	11	2	TEF1P-NAT1-TEF1T (based on pJK863)	HTL	Transcriptional regulation
312	408	TS134	barcode set	CAGL0L03377g	SIP4	YJL089W	CCGGCTAGTTAATTTGACTC	GGCTCCACTAAATAGACGCA	TS_2	D	10	4	TEF1P-NAT1-TEF1T (based on pJK863)	HTL	Transcriptional regulation
313	409	TS179	barcode set	CAGL0K12430g	STE2	YFL026W	ATTACCTAGTCGGAGACAGG	TATCAGTTCCGCAGACGGGT	TS_2	D	3	3	TEF1P-NAT1-TEF1T (based on pJK863)	HTL	Signal transduction
314	410	TS206	barcode set	CAGL0D02530g	EGT2	YNL327W	CCCTGTTATGAACCTTGATC	CGCTTCGAGTATGGGATATT	TS_1	B	12	2	TEF1P-NAT1-TEF1T (based on pJK863)	HTL	Cell wall organization
315	411	TS193	barcode set	CAGL0H08624g	MCM16	YPR046W	GATGCGGCACTATCGCTCAT	CAGCGCGTACTAGACTGGAT	TS_1	H	11	1	TEF1P-NAT1-TEF1T (based on pJK863)	HTL	Other
316	412	TS193	barcode set	CAGL0H08624g	MCM16	YPR046W	GATGCGGCACTATCGCTCAT	CAGCGCGTACTAGACTGGAT	TS_1	H	11	2	TEF1P-NAT1-TEF1T (based on pJK863)	HTL	Other
317	413	TS193	barcode set	CAGL0H08624g	MCM16	YPR046W	GATGCGGCACTATCGCTCAT	CAGCGCGTACTAGACTGGAT	TS_1	H	11	3	TEF1P-NAT1-TEF1T (based on pJK863)	HTL	Other
318	414	TS194	barcode set	CAGL0H05621g	RLM1	YPL089C	ATTGAGCCTGACCACATGCG	TAGGTTGAGGCGATCGCGAT	TS_1	H	7	1	TEF1P-NAT1-TEF1T (based on pJK863)	HTL	Transcriptional regulation
319	415	TS194	barcode set	CAGL0H05621g	RLM1	YPL089C	ATTGAGCCTGACCACATGCG	TAGGTTGAGGCGATCGCGAT	TS_1	H	7	2	TEF1P-NAT1-TEF1T (based on pJK863)	HTL	Transcriptional regulation
320	416	TS194	barcode set	CAGL0H05621g	RLM1	YPL089C	ATTGAGCCTGACCACATGCG	TAGGTTGAGGCGATCGCGAT	TS_1	H	7	3	TEF1P-NAT1-TEF1T (based on pJK863)	HTL	Transcriptional regulation
321	417	TS195	barcode set	CAGL0H04367g	WAR1	YML076C	TACCTATTGACCAGTGGGCG	TACGGATGTCGACTAACCAT	TS_1	H	6	1	TEF1P-NAT1-TEF1T (based on pJK863)	HTL	Transcriptional regulation
322	418	TS195	barcode set	CAGL0H04367g	WAR1	YML076C	TACCTATTGACCAGTGGGCG	TACGGATGTCGACTAACCAT	TS_1	H	6	2	TEF1P-NAT1-TEF1T (based on pJK863)	HTL	Transcriptional regulation
323	419	TS195	barcode set	CAGL0H04367g	WAR1	YML076C	TACCTATTGACCAGTGGGCG	TACGGATGTCGACTAACCAT	TS_1	H	6	3	TEF1P-NAT1-TEF1T (based on pJK863)	HTL	Transcriptional regulation
324	420	TS196	barcode set	CAGL0G09449g	CRH1	YGR189C	TGCGCGGTCAAACCAAGCAA	TAATCGCTACGAATGCTACC	TS_1	G	8	1	TEF1P-NAT1-TEF1T (based on pJK863)	HTL	Cell wall organization
325	421	TS196	barcode set	CAGL0G09449g	CRH1	YGR189C	TGCGCGGTCAAACCAAGCAA	TAATCGCTACGAATGCTACC	TS_1	G	8	3	TEF1P-NAT1-TEF1T (based on pJK863)	HTL	Cell wall organization
326	422	TS196	barcode set	CAGL0G09449g	CRH1	YGR189C	TGCGCGGTCAAACCAAGCAA	TAATCGCTACGAATGCTACC	TS_1	G	8	4	TEF1P-NAT1-TEF1T (based on pJK863)	HTL	Cell wall organization
327	423	TS197	barcode set	CAGL0G08844g		YIL130W	AGAGATTCGCTTAACGCCCG	ATTCCGAGCGGCAGCGATAT	TS_1	G	6	3	TEF1P-NAT1-TEF1T (based on pJK863)	HTL	Transcriptional regulation
328	424	TS197	barcode set	CAGL0G08844g		YIL130W	AGAGATTCGCTTAACGCCCG	ATTCCGAGCGGCAGCGATAT	TS_1	G	6	4	TEF1P-NAT1-TEF1T (based on pJK863)	HTL	Transcriptional regulation
329	425	TS197	barcode set	CAGL0G08844g		YIL130W	AGAGATTCGCTTAACGCCCG	ATTCCGAGCGGCAGCGATAT	TS_1	G	6	5	TEF1P-NAT1-TEF1T (based on pJK863)	HTL	Transcriptional regulation
330	426	TS198	barcode set	CAGL0G09757g		YLR278C	TTCACCGAGACAAGGCGAGA	AATAGGACGGAACGCCATCC	TS_1	G	9	1	TEF1P-NAT1-TEF1T (based on pJK863)	HTL	Transcriptional regulation
331	427	TS198	barcode set	CAGL0G09757g		YLR278C	TTCACCGAGACAAGGCGAGA	AATAGGACGGAACGCCATCC	TS_1	G	9	2	TEF1P-NAT1-TEF1T (based on pJK863)	HTL	Transcriptional regulation
332	428	TS198	barcode set	CAGL0G09757g		YLR278C	TTCACCGAGACAAGGCGAGA	AATAGGACGGAACGCCATCC	TS_1	G	9	3	TEF1P-NAT1-TEF1T (based on pJK863)	HTL	Transcriptional regulation
333	429	TS199	barcode set	CAGL0E04620g	ECM33	YBR078W	ATTAGCGTCTCGACTACCTT	ACGGACCTTGTACGCGATCT	TS_1	D	4	1	TEF1P-NAT1-TEF1T (based on pJK863)	HTL	Cell wall organization
334	430	TS200	barcode set	CAGL0E06666g	MUC1	YIR019C	CCGACCGTATAAGTTCTATC	AATTCGTATGCACCGGGCGT	TS_1	D	7	1	TEF1P-NAT1-TEF1T (based on pJK863)	HTL	Cell wall organization
335	431	TS200	barcode set	CAGL0E06666g	MUC1	YIR019C	CCGACCGTATAAGTTCTATC	AATTCGTATGCACCGGGCGT	TS_1	D	7	2	TEF1P-NAT1-TEF1T (based on pJK863)	HTL	Cell wall organization
336	432	TS200	barcode set	CAGL0E06666g	MUC1	YIR019C	CCGACCGTATAAGTTCTATC	AATTCGTATGCACCGGGCGT	TS_1	D	7	3	TEF1P-NAT1-TEF1T (based on pJK863)	HTL	Cell wall organization
337	433	TS201	barcode set	CAGL0A04455g	SEF1	YBL066C	ATCGAGCACGTAACCGTTGC	ATATGATACTCACGACCCGG	TS_1	A	6	1	TEF1P-NAT1-TEF1T (based on pJK863)	HTL	Transcriptional regulation
338	434	TS201	barcode set	CAGL0A04455g	SEF1	YBL066C	ATCGAGCACGTAACCGTTGC	ATATGATACTCACGACCCGG	TS_1	A	6	4	TEF1P-NAT1-TEF1T (based on pJK863)	HTL	Transcriptional regulation
339	435	TS201	barcode set	CAGL0A04455g	SEF1	YBL066C	ATCGAGCACGTAACCGTTGC	ATATGATACTCACGACCCGG	TS_1	A	6	5	TEF1P-NAT1-TEF1T (based on pJK863)	HTL	Transcriptional regulation
340	436	TS202	barcode set	CAGL0C03872g	TIR3	YIL011W	CGGATATGTACTAATTGGGC	CCGCGTCTAGTATAGTATGT	TS_1	B	10	1	TEF1P-NAT1-TEF1T (based on pJK863)	HTL	Cell wall organization
341	437	TS202	barcode set	CAGL0C03872g	TIR3	YIL011W	CGGATATGTACTAATTGGGC	CCGCGTCTAGTATAGTATGT	TS_1	B	10	2	TEF1P-NAT1-TEF1T (based on pJK863)	HTL	Cell wall organization
342	438	TS202	barcode set	CAGL0C03872g	TIR3	YIL011W	CGGATATGTACTAATTGGGC	CCGCGTCTAGTATAGTATGT	TS_1	B	10	3	TEF1P-NAT1-TEF1T (based on pJK863)	HTL	Cell wall organization
343	439	TS101	barcode set	CAGL0H05621g	RLM1	YPL089C	AATGTCGCGTAATGGCTTAG	ACCTTATGTGTAATGAGCGG	TS_3	A	7	1	TEF1P-NAT1-TEF1T (based on pJK863)	HTL	Transcriptional regulation
344	440	TS101	barcode set	CAGL0H05621g	RLM1	YPL089C	AATGTCGCGTAATGGCTTAG	ACCTTATGTGTAATGAGCGG	TS_3	A	7	2	TEF1P-NAT1-TEF1T (based on pJK863)	HTL	Transcriptional regulation
345	441	TS101	barcode set	CAGL0H05621g	RLM1	YPL089C	AATGTCGCGTAATGGCTTAG	ACCTTATGTGTAATGAGCGG	TS_3	A	7	3	TEF1P-NAT1-TEF1T (based on pJK863)	HTL	Transcriptional regulation
346	442	TS203	barcode set	CAGL0D02794g	WSC4	YHL028W	GATTATACGCTATCCGAGGT	GACTCCGTACTCACTAGGAT	TS_3	B	8	1	TEF1P-NAT1-TEF1T (based on pJK863)	HTL	Signal transduction
347	443	TS203	barcode set	CAGL0D02794g	WSC4	YHL028W	GATTATACGCTATCCGAGGT	GACTCCGTACTCACTAGGAT	TS_3	B	8	2	TEF1P-NAT1-TEF1T (based on pJK863)	HTL	Signal transduction
348	444	TS203	barcode set	CAGL0D02794g	WSC4	YHL028W	GATTATACGCTATCCGAGGT	GACTCCGTACTCACTAGGAT	TS_3	B	8	3	TEF1P-NAT1-TEF1T (based on pJK863)	HTL	Signal transduction
349	445	TS204	barcode set	CAGL0J03828g	MKK2	YPL140C	ATCGAGCACGTAACCGTTGC	ATATGATACTCACGACCCGG	TS_3	A	6	1	TEF1P-NAT1-TEF1T (based on pJK863)	HTL	Signal transduction
350	446	TS204	barcode set	CAGL0J03828g	MKK2	YPL140C	ATCGAGCACGTAACCGTTGC	ATATGATACTCACGACCCGG	TS_3	A	6	2	TEF1P-NAT1-TEF1T (based on pJK863)	HTL	Signal transduction
351	447	TS205	barcode set	CAGL0G00242g	YOR1	YGR281W	TGGATTCGACTCGCTCGCAT	CATTACGTCAGATAGGGCTG	TS_1	F	6	1	TEF1P-NAT1-TEF1T (based on pJK863)	HTL	Transport
352	448	TS205	barcode set	CAGL0G00242g	YOR1	YGR281W	TGGATTCGACTCGCTCGCAT	CATTACGTCAGATAGGGCTG	TS_1	F	6	2	TEF1P-NAT1-TEF1T (based on pJK863)	HTL	Transport
353	449	TS207	barcode set	CAGL0L06138g	TPN1	YGL186C	GATGCGGCACTATCGCTCAT	CAGCGCGTACTAGACTGGAT	TS_2	H	11	1	TEF1P-NAT1-TEF1T (based on pJK863)	HTL	Transport
354	450	TS207	barcode set	CAGL0L06138g	TPN1	YGL186C	GATGCGGCACTATCGCTCAT	CAGCGCGTACTAGACTGGAT	TS_2	H	11	2	TEF1P-NAT1-TEF1T (based on pJK863)	HTL	Transport
355	451	TS207	barcode set	CAGL0L06138g	TPN1	YGL186C	GATGCGGCACTATCGCTCAT	CAGCGCGTACTAGACTGGAT	TS_2	H	11	3	TEF1P-NAT1-TEF1T (based on pJK863)	HTL	Transport
356	452	TS208	barcode set	CAGL0G00242g	YOR1	YGR281W	TGGATTCGACTCGCTCGCAT	CATTACGTCAGATAGGGCTG	TS_1	F	6	1	TEF1P-NAT1-TEF1T (based on pJK863)	HTL	Transport
357	453	TS208	barcode set	CAGL0G00242g	YOR1	YGR281W	TGGATTCGACTCGCTCGCAT	CATTACGTCAGATAGGGCTG	TS_1	F	6	2	TEF1P-NAT1-TEF1T (based on pJK863)	HTL	Transport
358	454	TS209	barcode set	CAGL0M10791g	SSK2	YNR031C	TCCATACCGATAAAGCTCGA	ATATACGGGTAACCAGCCGC	TS_2	G	10	1	TEF1P-NAT1-TEF1T (based on pJK863)	HTL	Other
359	455	TS209	barcode set	CAGL0M10791g	SSK2	YNR031C	TCCATACCGATAAAGCTCGA	ATATACGGGTAACCAGCCGC	TS_2	G	10	2	TEF1P-NAT1-TEF1T (based on pJK863)	HTL	Other
360	456	TS209	barcode set	CAGL0M10791g	SSK2	YNR031C	TCCATACCGATAAAGCTCGA	ATATACGGGTAACCAGCCGC	TS_2	G	10	3	TEF1P-NAT1-TEF1T (based on pJK863)	HTL	Other
361	457	TS209	barcode set	CAGL0M03597g	MID1	YNL291C	CGACTATTGTGACATACCTG	ACGTTGATCGCATGAGATTG	TS_2	F	5	6	TEF1P-NAT1-TEF1T (based on pJK863)	HTL	Transport
362	458	TS210	barcode set	CAGL0F01419g	AUS1	YOR011W	CAGAGTAAGTAACGGTTCGC	ATCGCGCAGGTCGGACATAT	TS_1	D	9	1	TEF1P-NAT1-TEF1T (based on pJK863)	HTL	Transport
363	459	TS210	barcode set	CAGL0F01419g	AUS1	YOR011W	CAGAGTAAGTAACGGTTCGC	ATCGCGCAGGTCGGACATAT	TS_1	D	9	1	TEF1P-NAT1-TEF1T (based on pJK863)	HTL	Transport
364	460	TS211	barcode set	CAGL0F02519g		YJL206C	GGTGTACCTCCAACTTACTA	GCTCCTAGAGTATGAGAGAT	TS_1	D	12	1	TEF1P-NAT1-TEF1T (based on pJK863)	HTL	Transcriptional regulation
365	461	TS211	barcode set	CAGL0F02519g		YJL206C	GGTGTACCTCCAACTTACTA	GCTCCTAGAGTATGAGAGAT	TS_1	D	12	2	TEF1P-NAT1-TEF1T (based on pJK863)	HTL	Transcriptional regulation
366	462	TS211	barcode set	CAGL0F02519g		YJL206C	GGTGTACCTCCAACTTACTA	GCTCCTAGAGTATGAGAGAT	TS_1	D	12	3	TEF1P-NAT1-TEF1T (based on pJK863)	HTL	Transcriptional regulation
367	463	TS211	barcode set	CAGL0F02519g		YJL206C	GGTGTACCTCCAACTTACTA	GCTCCTAGAGTATGAGAGAT	TS_1	D	12	4	TEF1P-NAT1-TEF1T (based on pJK863)	HTL	Transcriptional regulation
368	464	TS212	barcode set	CAGL0H06875g	ARG81	YML099C	ACACCGTATTTAAGACTGCG	GTTATTACCCTACATCGTCG	TS_1	H	9	3	TEF1P-NAT1-TEF1T (based on pJK863)	HTL	Transcriptional regulation
369	465	TS212	barcode set	CAGL0H06875g	ARG81	YML099C	ACACCGTATTTAAGACTGCG	GTTATTACCCTACATCGTCG	TS_1	H	9	7	TEF1P-NAT1-TEF1T (based on pJK863)	HTL	Transcriptional regulation
370	466	TS212	barcode set	CAGL0H06875g	ARG81	YML099C	ACACCGTATTTAAGACTGCG	GTTATTACCCTACATCGTCG	TS_1	H	9	10	TEF1P-NAT1-TEF1T (based on pJK863)	HTL	Transcriptional regulation
371	467	TS212	barcode set	CAGL0H06875g	ARG81	YML099C	ACACCGTATTTAAGACTGCG	GTTATTACCCTACATCGTCG	TS_1	H	9	11	TEF1P-NAT1-TEF1T (based on pJK863)	HTL	Transcriptional regulation
372	468	TS213	barcode set	CAGL0C02277g	GLN3	YER040W	GCCATTCGTATAACCGTGTC	GCGAGACCGCTTTACCAGAT	TS_1	B	7	2	TEF1P-NAT1-TEF1T (based on pJK863)	HTL	Transcriptional regulation
373	469	TS213	barcode set	CAGL0C02277g	GLN3	YER040W	GCCATTCGTATAACCGTGTC	GCGAGACCGCTTTACCAGAT	TS_1	B	7		TEF1P-NAT1-TEF1T (based on pJK863)	HTL	Transcriptional regulation
374	470	TS213	barcode set	CAGL0C02277g	GLN3	YER040W	GCCATTCGTATAACCGTGTC	GCGAGACCGCTTTACCAGAT	TS_1	B	7		TEF1P-NAT1-TEF1T (based on pJK863)	HTL	Transcriptional regulation
375	471	TS214	barcode set	CAGL0F07755g	CEP3	YMR168C	GCGCTGCAATCAGAAAGGTA	GCGAGACCGCTTTACCAGAT	TS_1	E	12		TEF1P-NAT1-TEF1T (based on pJK863)	HTL	Chromatin
376	472	TS214	barcode set	CAGL0F07755g	CEP3	YMR168C	GCGCTGCAATCAGAAAGGTA	GCGAGACCGCTTTACCAGAT	TS_1	E	12		TEF1P-NAT1-TEF1T (based on pJK863)	HTL	Chromatin
377	473	TS214	barcode set	CAGL0F07755g	CEP3	YMR168C	GCGCTGCAATCAGAAAGGTA	GCGAGACCGCTTTACCAGAT	TS_1	E	12	2	TEF1P-NAT1-TEF1T (based on pJK863)	HTL	Chromatin
378	474	TS215	barcode set	CAGL0F02717g	PDR15	YDR406W	TAGTGACTTAGACCCTCCGT	GCGAGACCGCTTTACCAGAT	TS_1	E	1		TEF1P-NAT1-TEF1T (based on pJK863)	HTL	Transport
379	475	TS215	barcode set	CAGL0F02717g	PDR15	YDR406W	TAGTGACTTAGACCCTCCGT	GCGAGACCGCTTTACCAGAT	TS_1	E	1		TEF1P-NAT1-TEF1T (based on pJK863)	HTL	Transport
380	476	TS215	barcode set	CAGL0F02717g	PDR15	YDR406W	TAGTGACTTAGACCCTCCGT	GCGAGACCGCTTTACCAGAT	TS_1	E	1	2	TEF1P-NAT1-TEF1T (based on pJK863)	HTL	Transport
381	477	TS216	barcode set	CAGL0A04081g	SRP40	YKR092C	AAGATAGTCGCCGAACTCGC	GCGAGACCGCTTTACCAGAT	TS_1	A	5	1	TEF1P-NAT1-TEF1T (based on pJK863)	HTL	Cell wall organization
382	478	TS216	barcode set	CAGL0A04081g	SRP40	YKR092C	AAGATAGTCGCCGAACTCGC	GCGAGACCGCTTTACCAGAT	TS_1	A	5	2	TEF1P-NAT1-TEF1T (based on pJK863)	HTL	Cell wall organization
383	479	TS216	barcode set	CAGL0A04081g	SRP40	YKR092C	AAGATAGTCGCCGAACTCGC	GCGAGACCGCTTTACCAGAT	TS_1	A	5	3	TEF1P-NAT1-TEF1T (based on pJK863)	HTL	Cell wall organization
384	480	TS217	barcode set	CAGL0D02904g	PPR1	YLR014C	CGACCCTGATGATCCTTTAT	GCGAGACCGCTTTACCAGAT	TS_1	C	2	1	TEF1P-NAT1-TEF1T (based on pJK863)	HTL	Transcriptional regulation
385	481	TS217	barcode set	CAGL0D02904g	PPR1	YLR014C	CGACCCTGATGATCCTTTAT	GCGAGACCGCTTTACCAGAT	TS_1	C	2	2	TEF1P-NAT1-TEF1T (based on pJK863)	HTL	Transcriptional regulation
386	482	TS217	barcode set	CAGL0D02904g	PPR1	YLR014C	CGACCCTGATGATCCTTTAT	GCGAGACCGCTTTACCAGAT	TS_1	C	2	3	TEF1P-NAT1-TEF1T (based on pJK863)	HTL	Transcriptional regulation
387	483	TS218	barcode set	CAGL0H02563g	HOR7	YMR251W-A	GGGTACATACGCATATTAGC	GCGAGACCGCTTTACCAGAT	TS_1	H	3	1	TEF1P-NAT1-TEF1T (based on pJK863)	HTL	Cell wall organization
388	484	TS218	barcode set	CAGL0H02563g	HOR7	YMR251W-A	GGGTACATACGCATATTAGC	GCGAGACCGCTTTACCAGAT	TS_1	H	3	2	TEF1P-NAT1-TEF1T (based on pJK863)	HTL	Cell wall organization
389	485	TS218	barcode set	CAGL0H02563g	HOR7	YMR251W-A	GGGTACATACGCATATTAGC	GCGAGACCGCTTTACCAGAT	TS_1	H	3	3	TEF1P-NAT1-TEF1T (based on pJK863)	HTL	Cell wall organization
390	486	TS219	barcode set	CAGL0G01320g	MSG5	YNL053W	GAGCTTGACTCACCGTCTTG	GCGAGACCGCTTTACCAGAT	TS_1	F	8	1	TEF1P-NAT1-TEF1T (based on pJK863)	HTL	Signal transduction
391	487	TS220	barcode set	CAGL0D02882g	SSK1	YLR006C	CGCGCAGAGGTTAGATAAAT	GCGAGACCGCTTTACCAGAT	TS_1	C	1	1	TEF1P-NAT1-TEF1T (based on pJK863)	HTL	Signal transduction
392	488	TS221	barcode set	CAGL0D06512g	CDC25	YLR310C	GCATTAACGGGAACTAGAGC	GCGAGACCGCTTTACCAGAT	TS_1	C	8	1	TEF1P-NAT1-TEF1T (based on pJK863)	HTL	Other
393	489	TS222	barcode set	CAGL0L03520g	BCK1	YJL095W	AAGATAGTCGCCGAACTCGC	GCGAGACCGCTTTACCAGAT	TS_3	A	5	1	TEF1P-NAT1-TEF1T (based on pJK863)	HTL	Signal transduction
394	490	TS222	barcode set	CAGL0L03520g	BCK1	YJL095W	AAGATAGTCGCCGAACTCGC	GCGAGACCGCTTTACCAGAT	TS_3	A	5		TEF1P-NAT1-TEF1T (based on pJK863)	HTL	Signal transduction
395	491	TS222	barcode set	CAGL0L03520g	BCK1	YJL095W	AAGATAGTCGCCGAACTCGC	GCGAGACCGCTTTACCAGAT	TS_3	A	5		TEF1P-NAT1-TEF1T (based on pJK863)	HTL	Signal transduction
396	492	TS222	barcode set	CAGL0L03520g	BCK1	YJL095W	AAGATAGTCGCCGAACTCGC	GCGAGACCGCTTTACCAGAT	TS_3	A	5	3	TEF1P-NAT1-TEF1T (based on pJK863)	HTL	Signal transduction
397	493	TS223	barcode set	CAGL0J08206g	BNI1	YNL271C	GATTATACGCTATCCGAGGT	GACTCCGTACTCACTAGGAT	TS_2	B	8	3	TEF1P-NAT1-TEF1T (based on pJK863)	HTL	Other
398	494	TS223	barcode set	CAGL0J08206g	BNI1	YNL271C	GATTATACGCTATCCGAGGT	GACTCCGTACTCACTAGGAT	TS_2	B	8	4	TEF1P-NAT1-TEF1T (based on pJK863)	HTL	Other
399	495	TS223	barcode set	CAGL0J08206g	BNI1	YNL271C	GATTATACGCTATCCGAGGT	GACTCCGTACTCACTAGGAT	TS_2	B	8	10	TEF1P-NAT1-TEF1T (based on pJK863)	HTL	Other
400	496	TS224	barcode set	CAGL0J08613g	YVC1	YOR087W	GTATTCCGACTGCGGCACTT	GCGAGACCGCTTTACCAGAT	TS_2	B	9	1	TEF1P-NAT1-TEF1T (based on pJK863)	HTL	Other
401	497	TS224	barcode set	CAGL0J08613g	YVC1	YOR087W	GTATTCCGACTGCGGCACTT	GCGAGACCGCTTTACCAGAT	TS_2	B	9	2	TEF1P-NAT1-TEF1T (based on pJK863)	HTL	Other
402	498	TS224	barcode set	CAGL0J08613g	YVC1	YOR087W	GTATTCCGACTGCGGCACTT	GCGAGACCGCTTTACCAGAT	TS_2	B	9	7	TEF1P-NAT1-TEF1T (based on pJK863)	HTL	Other
403	499	TS225	barcode set	CAGL0K05423g	TIP41	YPR040W	GGGTACTCCACAACATTACA	GCGAGACCGCTTTACCAGAT	TS_2	C	6	6	TEF1P-NAT1-TEF1T (based on pJK863)	HTL	Signal transduction
404	500	TS225	barcode set	CAGL0K05423g	TIP41	YPR040W	GGGTACTCCACAACATTACA	GCGAGACCGCTTTACCAGAT	TS_2	C	6	8	TEF1P-NAT1-TEF1T (based on pJK863)	HTL	Signal transduction
405	501	TS225	barcode set	CAGL0K05423g	TIP41	YPR040W	GGGTACTCCACAACATTACA	GCGAGACCGCTTTACCAGAT	TS_2	C	6	13	TEF1P-NAT1-TEF1T (based on pJK863)	HTL	Signal transduction
406	502	TS226	barcode set	CAGL0G04125g	SAG1	YJR004C	GCTACAAACATAAGTGCGGC	GCGAGACCGCTTTACCAGAT	TS_3	A	3	2	TEF1P-NAT1-TEF1T (based on pJK863)	HTL	Cell wall organization
407	503	TS226	barcode set	CAGL0G04125g	SAG1	YJR004C	GCTACAAACATAAGTGCGGC	GCGAGACCGCTTTACCAGAT	TS_3	A	3	8	TEF1P-NAT1-TEF1T (based on pJK863)	HTL	Cell wall organization
408	504	TS226	barcode set	CAGL0G04125g	SAG1	YJR004C	GCTACAAACATAAGTGCGGC	GCGAGACCGCTTTACCAGAT	TS_3	A	3	10	TEF1P-NAT1-TEF1T (based on pJK863)	HTL	Cell wall organization
409	505	TS227	barcode set	CAGL0M13827g	FKS3	YMR306W	GCATTAACGGGAACTAGAGC	GCGAGACCGCTTTACCAGAT	TS_3	B	6	2	TEF1P-NAT1-TEF1T (based on pJK863)	HTL	Cell wall organization
410	506	TS227	barcode set	CAGL0M13827g	FKS3	YMR306W	GCATTAACGGGAACTAGAGC	GCGAGACCGCTTTACCAGAT	TS_3	B	6	1	TEF1P-NAT1-TEF1T (based on pJK863)	HTL	Cell wall organization
411	507	TS227	barcode set	CAGL0M13827g	FKS3	YMR306W	GCATTAACGGGAACTAGAGC	GCGAGACCGCTTTACCAGAT	TS_3	B	6	3	TEF1P-NAT1-TEF1T (based on pJK863)	HTL	Cell wall organization
412	508	TS228	barcode set	CAGL0G02497g	MLP1	YKR095W	CGGATATGTACTAATTGGGC	GCGAGACCGCTTTACCAGAT	TS_3	B	10	9	TEF1P-NAT1-TEF1T (based on pJK863)	HTL	Other
413	509	TS228	barcode set	CAGL0G02497g	MLP1	YKR095W	CGGATATGTACTAATTGGGC	GCGAGACCGCTTTACCAGAT	TS_3	B	10	10	TEF1P-NAT1-TEF1T (based on pJK863)	HTL	Other
414	510	TS229	barcode set	CAGL0B04389g	CHS3	YBR023C	CCCTGTTATGAACCTTGATC	GCGAGACCGCTTTACCAGAT	TS_3	B	12	1	TEF1P-NAT1-TEF1T (based on pJK863)	HTL	Cell wall organization
415	511	TS229	barcode set	CAGL0B04389g	CHS3	YBR023C	CCCTGTTATGAACCTTGATC	GCGAGACCGCTTTACCAGAT	TS_3	B	12	7	TEF1P-NAT1-TEF1T (based on pJK863)	HTL	Cell wall organization
416	512	TS229	barcode set	CAGL0B04389g	CHS3	YBR023C	CCCTGTTATGAACCTTGATC	GCGAGACCGCTTTACCAGAT	TS_3	B	12	4	TEF1P-NAT1-TEF1T (based on pJK863)	HTL	Cell wall organization
417	519	TS231	barcode set	CAGL0J00539g	SLT2	YHR030C	ATCGGCCTGTAATCGGATCG	GCGAGACCGCTTTACCAGAT	TS_3	B	1	1	TEF1P-NAT1-TEF1T (based on pJK863)	HTL	Signal transduction
418	520	TS231	barcode set	CAGL0J00539g	SLT2	YHR030C	ATCGGCCTGTAATCGGATCG	GCGAGACCGCTTTACCAGAT	TS_3	B	1	3	TEF1P-NAT1-TEF1T (based on pJK863)	HTL	Signal transduction
419	521	TS231	barcode set	CAGL0J00539g	SLT2	YHR030C	ATCGGCCTGTAATCGGATCG	GCGAGACCGCTTTACCAGAT	TS_3	B	1	4	TEF1P-NAT1-TEF1T (based on pJK863)	HTL	Signal transduction
420	522	TS231	barcode set	CAGL0J00539g	SLT2	YHR030C	ATCGGCCTGTAATCGGATCG	GCGAGACCGCTTTACCAGAT	TS_3	B	1	5	TEF1P-NAT1-TEF1T (based on pJK863)	HTL	Signal transduction
421	523	TS232	barcode set	CAGL0G04873g	ROM2	YLR371W	ATCGAACGTGTGTCAAACGC	GCGAGACCGCTTTACCAGAT	TS_3	A	4	1	TEF1P-NAT1-TEF1T (based on pJK863)	HTL	Signal transduction
422	524	TS233	barcode set	CAGL0K04037g	GSC2	YGR032W	GCCATTCGTATAACCGTGTC	GCGAGACCGCTTTACCAGAT	TS_3	B	7	12	TEF1P-NAT1-TEF1T (based on pJK863)	HTL	Cell wall organization
423	525	TS233	barcode set	CAGL0K04037g	GSC2	YGR032W	GCCATTCGTATAACCGTGTC	GCGAGACCGCTTTACCAGAT	TS_3	B	7	13	TEF1P-NAT1-TEF1T (based on pJK863)	HTL	Cell wall organization
424	526	TS233	barcode set	CAGL0K04037g	GSC2	YGR032W	GCCATTCGTATAACCGTGTC	GCGAGACCGCTTTACCAGAT	TS_3	B	7	3	TEF1P-NAT1-TEF1T (based on pJK863)	HTL	Cell wall organization
425	527	TS234	barcode set	CAGL0F07865g	UPC2	YDR213W	AGCATGTCTCTAACTGGACG	GCGAGACCGCTTTACCAGAT	TS_1	F	1	1	TEF1P-NAT1-TEF1T (based on pJK863)	HTL	Transcriptional regulation
426	528	TS234	barcode set	CAGL0F07865g	UPC2	YDR213W	AGCATGTCTCTAACTGGACG	GCGAGACCGCTTTACCAGAT	TS_1	F	1	2	TEF1P-NAT1-TEF1T (based on pJK863)	HTL	Transcriptional regulation
427	529	TS235	barcode set	CAGL0D06204g	RIM8	YGL045W	GCTAATCGCTAATTCGTTCC	GCGAGACCGCTTTACCAGAT	TS_1	C	7	2	TEF1P-NAT1-TEF1T (based on pJK863)	HTL	Other
428	530	TS236	barcode set	CAGL0F02079g	SMC1	YFL008W	GGCTAACCGAAACCGTGACA	GCGAGACCGCTTTACCAGAT	TS_1	D	11	1	TEF1P-NAT1-TEF1T (based on pJK863)	HTL	Other
429	531	TS237	barcode set	CAGL0E03355g	BPT1	YLL015W	TAATACCCGATCACTGGTGG	GCGAGACCGCTTTACCAGAT	TS_1	C	12	1	TEF1P-NAT1-TEF1T (based on pJK863)	HTL	Transport
430	532	TS238	barcode set	CAGL0I08195g	GPA2	YER020W	ATCGGCCTGTAATCGGATCG	GCGAGACCGCTTTACCAGAT	TS_2	B	1	6	TEF1P-NAT1-TEF1T (based on pJK863)	HTL	Signal transduction
431	533	TS238	barcode set	CAGL0I08195g	GPA2	YER020W	ATCGGCCTGTAATCGGATCG	GCGAGACCGCTTTACCAGAT	TS_2	B	1	11	TEF1P-NAT1-TEF1T (based on pJK863)	HTL	Signal transduction
432	534	TS238	barcode set	CAGL0I08195g	GPA2	YER020W	ATCGGCCTGTAATCGGATCG	GCGAGACCGCTTTACCAGAT	TS_2	B	1	13	TEF1P-NAT1-TEF1T (based on pJK863)	HTL	Signal transduction
433	535	TS238	barcode set	CAGL0I08195g	GPA2	YER020W	ATCGGCCTGTAATCGGATCG	GCGAGACCGCTTTACCAGAT	TS_2	B	1	14	TEF1P-NAT1-TEF1T (based on pJK863)	HTL	Signal transduction
434	536	TS239	barcode set	CAGL0J11748g	PLB2	YMR006C	CCCTGTTATGAACCTTGATC	GCGAGACCGCTTTACCAGAT	TS_2	B	12	1	TEF1P-NAT1-TEF1T (based on pJK863)	HTL	Cell wall organization
435	537	TS239	barcode set	CAGL0J11748g	PLB2	YMR006C	CCCTGTTATGAACCTTGATC	GCGAGACCGCTTTACCAGAT	TS_2	B	12	2	TEF1P-NAT1-TEF1T (based on pJK863)	HTL	Cell wall organization
436	538	TS239	barcode set	CAGL0J11748g	PLB2	YMR006C	CCCTGTTATGAACCTTGATC	GCGAGACCGCTTTACCAGAT	TS_2	B	12	4	TEF1P-NAT1-TEF1T (based on pJK863)	HTL	Cell wall organization
437	539	TS240	barcode set	CAGL0K01507g	GPR1	YDL035C	GTGAGCGAAACACCGCGTAA	GCGAGACCGCTTTACCAGAT	TS_2	C	4	1	TEF1P-NAT1-TEF1T (based on pJK863)	HTL	Signal transduction
438	540	TS240	barcode set	CAGL0K01507g	GPR1	YDL035C	GTGAGCGAAACACCGCGTAA	GCGAGACCGCTTTACCAGAT	TS_2	C	4	2	TEF1P-NAT1-TEF1T (based on pJK863)	HTL	Signal transduction
439	541	TS241	barcode set	CAGL0K12078g	NRG1	YDR043C	ATTACGAGGTACGCGCTTCG	GCGAGACCGCTTTACCAGAT	TS_2	D	2	1	TEF1P-NAT1-TEF1T (based on pJK863)	HTL	Transcriptional regulation
440	542	TS241	barcode set	CAGL0K12078g	NRG1	YDR043C	ATTACGAGGTACGCGCTTCG	GCGAGACCGCTTTACCAGAT	TS_2	D	2	4	TEF1P-NAT1-TEF1T (based on pJK863)	HTL	Transcriptional regulation
441	543	TS241	barcode set	CAGL0K12078g	NRG1	YDR043C	ATTACGAGGTACGCGCTTCG	GCGAGACCGCTTTACCAGAT	TS_2	D	2	5	TEF1P-NAT1-TEF1T (based on pJK863)	HTL	Transcriptional regulation
442	544	TS242	barcode set	CAGL0K12562g	RIM15	YFL033C	ATTAGCGTCTCGACTACCTT	GCGAGACCGCTTTACCAGAT	TS_2	D	4	3	TEF1P-NAT1-TEF1T (based on pJK863)	HTL	Signal transduction
443	545	TS242	barcode set	CAGL0K12562g	RIM15	YFL033C	ATTAGCGTCTCGACTACCTT	GCGAGACCGCTTTACCAGAT	TS_2	D	4	6	TEF1P-NAT1-TEF1T (based on pJK863)	HTL	Signal transduction
444	546	TS242	barcode set	CAGL0K12562g	RIM15	YFL033C	ATTAGCGTCTCGACTACCTT	GCGAGACCGCTTTACCAGAT	TS_2	D	4	8	TEF1P-NAT1-TEF1T (based on pJK863)	HTL	Signal transduction
445	547	TS242	barcode set	CAGL0K12562g	RIM15	YFL033C	ATTAGCGTCTCGACTACCTT	GCGAGACCGCTTTACCAGAT	TS_2	D	4	9	TEF1P-NAT1-TEF1T (based on pJK863)	HTL	Signal transduction
446	548	TS243	barcode set	CAGL0L01903g	RGT1	YKL038W	CCGTTATACGAATATCGACC	GCGAGACCGCTTTACCAGAT	TS_2	D	8	1	TEF1P-NAT1-TEF1T (based on pJK863)	HTL	Transcriptional regulation
447	549	TS244	barcode set	CAGL0M03597g	MID1	YNL291C	CGACTATTGTGACATACCTG	GCGAGACCGCTTTACCAGAT	TS_2	F	5	1	TEF1P-NAT1-TEF1T (based on pJK863)	HTL	Transport
448	550	TS245	barcode set	CAGL0M13739g	ATM1	YMR301C	GGGTACATACGCATATTAGC	GCGAGACCGCTTTACCAGAT	TS_2	H	3	1	TEF1P-NAT1-TEF1T (based on pJK863)	HTL	Transport
449	551	TS246	barcode set	CAGL0B04521g	RAS1	YOR101W	GTGAGCGAAACACCGCGTAA	GCGAGACCGCTTTACCAGAT	TS_1	B	2	1	TEF1P-NAT1-TEF1T (based on pJK863)	HTL	Other
450	552	TS247	barcode set	CAGL0C01463g	TCO89	YPL180W	GCTAATCGCTAATTCGTTCC	GCGAGACCGCTTTACCAGAT	TS_1	B	5	3	TEF1P-NAT1-TEF1T (based on pJK863)	HTL	Cell wall organization
451	553	TS247	barcode set	CAGL0C01463g	TCO89	YPL180W	GCTAATCGCTAATTCGTTCC	GCGAGACCGCTTTACCAGAT	TS_1	B	5	4	TEF1P-NAT1-TEF1T (based on pJK863)	HTL	Cell wall organization
452	554	TS248	barcode set	CAGL0C02343g	ARB1	YER036C	GATTATACGCTATCCGAGGT	GACTCCGTACTCACTAGGAT	TS_1	B	8	1	TEF1P-NAT1-TEF1T (based on pJK863)	HTL	Other
453	555	TS248	barcode set	CAGL0C02343g	ARB1	YER036C	GATTATACGCTATCCGAGGT	GACTCCGTACTCACTAGGAT	TS_1	B	8	2	TEF1P-NAT1-TEF1T (based on pJK863)	HTL	Other
454	556	TS248	barcode set	CAGL0C02343g	ARB1	YER036C	GATTATACGCTATCCGAGGT	GACTCCGTACTCACTAGGAT	TS_1	B	8	4	TEF1P-NAT1-TEF1T (based on pJK863)	HTL	Other
455	557	TS249	barcode set	CAGL0D02530g	EGT2	YNL327W	CCCTGTTATGAACCTTGATC	GCGAGACCGCTTTACCAGAT	TS_1	B	12	1	TEF1P-NAT1-TEF1T (based on pJK863)	HTL	Cell wall organization
456	558	TS249	barcode set	CAGL0D02530g	EGT2	YNL327W	CCCTGTTATGAACCTTGATC	GCGAGACCGCTTTACCAGAT	TS_1	B	12	2	TEF1P-NAT1-TEF1T (based on pJK863)	HTL	Cell wall organization
457	559	TS250	barcode set	CAGL0E03762g	RIM101	YHL027W	ATTACGAGGTACGCGCTTCG	GCGAGACCGCTTTACCAGAT	TS_1	D	2	1	TEF1P-NAT1-TEF1T (based on pJK863)	HTL	Transcriptional regulation
458	560	TS250	barcode set	CAGL0E03762g	RIM101	YHL027W	ATTACGAGGTACGCGCTTCG	GCGAGACCGCTTTACCAGAT	TS_1	D	2	2	TEF1P-NAT1-TEF1T (based on pJK863)	HTL	Transcriptional regulation
459	561	TS251	barcode set	CAGL0F03025g	ARO80	YDR421W	TATAGTTCGGGCCATACGGT	GCGAGACCGCTTTACCAGAT	TS_1	E	2	1	TEF1P-NAT1-TEF1T (based on pJK863)	HTL	Transcriptional regulation
460	562	TS252	barcode set	CAGL0G02827g	SLM1	YIL105C	TATGGCACCACACGAAGGAC	GCGAGACCGCTTTACCAGAT	TS_1	F	11	1	TEF1P-NAT1-TEF1T (based on pJK863)	HTL	Signal transduction
461	563	TS252	barcode set	CAGL0G02827g	SLM1	YIL105C	TATGGCACCACACGAAGGAC	GCGAGACCGCTTTACCAGAT	TS_1	F	11	2	TEF1P-NAT1-TEF1T (based on pJK863)	HTL	Signal transduction
462	564	TS253	barcode set	CAGL0H00396g	LEU3	YLR451W	TACTGACGCGGGACTGACTT	GCGAGACCGCTTTACCAGAT	TS_1	G	11	1	TEF1P-NAT1-TEF1T (based on pJK863)	HTL	Transcriptional regulation
463	567	TS255	barcode set	CAGL0M08756g	EXG2	YDR261C	CATAAGCGTTGTGAATCGCG	GCGAGACCGCTTTACCAGAT	TS_2	G	7	1	TEF1P-NAT1-TEF1T (based on pJK863)	HTL	Cell wall organization
464	568	TS255	barcode set	CAGL0M08756g	EXG2	YDR261C	CATAAGCGTTGTGAATCGCG	GCGAGACCGCTTTACCAGAT	TS_2	G	7	2	TEF1P-NAT1-TEF1T (based on pJK863)	HTL	Cell wall organization
465	569	TS256	barcode set	CAGL0D05434g	ROX1	YPR065W	CGCCTAAGACCGGATAAAGC	GCGAGACCGCTTTACCAGAT	TS_4	A	1	1	TEF1P-NAT1-TEF1T (based on pJK863)	HTL	Transcriptional regulation
466	570	TS256	barcode set	CAGL0D05434g	ROX1	YPR065W	CGCCTAAGACCGGATAAAGC	GCGAGACCGCTTTACCAGAT	TS_4	A	1	2	TEF1P-NAT1-TEF1T (based on pJK863)	HTL	Transcriptional regulation
467	571	TS256	barcode set	CAGL0D05434g	ROX1	YPR065W	CGCCTAAGACCGGATAAAGC	GCGAGACCGCTTTACCAGAT	TS_4	A	1	3	TEF1P-NAT1-TEF1T (based on pJK863)	HTL	Transcriptional regulation
468	572	TS257	barcode set	CAGL0K05841g	HAP1	YLR256W	CGATTCGATAAATGACGCGA	GCGAGACCGCTTTACCAGAT	TS_4	A	2	1	TEF1P-NAT1-TEF1T (based on pJK863)	HTL	Transcriptional regulation
469	573	TS257	barcode set	CAGL0K05841g	HAP1	YLR256W	CGATTCGATAAATGACGCGA	GCGAGACCGCTTTACCAGAT	TS_4	A	2	2	TEF1P-NAT1-TEF1T (based on pJK863)	HTL	Transcriptional regulation
470	574	TS258	barcode set	CAGL0K03003g	MOT3	YMR070W	GCTACAAACATAAGTGCGGC	GCGAGACCGCTTTACCAGAT	TS_4	A	3	1	TEF1P-NAT1-TEF1T (based on pJK863)	HTL	Transcriptional regulation
471	575	TS258	barcode set	CAGL0K03003g	MOT3	YMR070W	GCTACAAACATAAGTGCGGC	GCGAGACCGCTTTACCAGAT	TS_4	A	3	2	TEF1P-NAT1-TEF1T (based on pJK863)	HTL	Transcriptional regulation
472	576	TS258	barcode set	CAGL0K03003g	MOT3	YMR070W	GCTACAAACATAAGTGCGGC	GCGAGACCGCTTTACCAGAT	TS_4	A	3	3	TEF1P-NAT1-TEF1T (based on pJK863)	HTL	Transcriptional regulation
473	577	TS259	barcode set	CAGL0B01441g	RPD3	YNL330C	ATCGAACGTGTGTCAAACGC	GCGAGACCGCTTTACCAGAT	TS_4	A	4	1	TEF1P-NAT1-TEF1T (based on pJK863)	HTL	Chromatin
474	578	TS259	barcode set	CAGL0B01441g	RPD3	YNL330C	ATCGAACGTGTGTCAAACGC	GCGAGACCGCTTTACCAGAT	TS_4	A	4	2	TEF1P-NAT1-TEF1T (based on pJK863)	HTL	Chromatin
475	579	TS260	barcode set	CAGL0L00583g		YPL230W	AAGATAGTCGCCGAACTCGC	GCGAGACCGCTTTACCAGAT	TS_4	A	5	1	TEF1P-NAT1-TEF1T (based on pJK863)	HTL	Transcriptional regulation
476	580	TS260	barcode set	CAGL0L00583g		YPL230W	AAGATAGTCGCCGAACTCGC	GCGAGACCGCTTTACCAGAT	TS_4	A	5	2	TEF1P-NAT1-TEF1T (based on pJK863)	HTL	Transcriptional regulation
477	581	TS260	barcode set	CAGL0L00583g		YPL230W	AAGATAGTCGCCGAACTCGC	GCGAGACCGCTTTACCAGAT	TS_4	A	5	3	TEF1P-NAT1-TEF1T (based on pJK863)	HTL	Transcriptional regulation
478	582	TS261	barcode set	CAGL0E01859g	YPS1	YLR120C	ATCGAGCACGTAACCGTTGC	GCGAGACCGCTTTACCAGAT	TS_4	A	6	1	TEF1P-NAT1-TEF1T (based on pJK863)	HTL	Cell wall organization
479	583	TS261	barcode set	CAGL0E01859g	YPS1	YLR120C	ATCGAGCACGTAACCGTTGC	GCGAGACCGCTTTACCAGAT	TS_4	A	6	1	TEF1P-NAT1-TEF1T (based on pJK863)	HTL	Cell wall organization
480	584	TS261	barcode set	CAGL0E01859g	YPS1	YLR120C	ATCGAGCACGTAACCGTTGC	GCGAGACCGCTTTACCAGAT	TS_4	A	6	1	TEF1P-NAT1-TEF1T (based on pJK863)	HTL	Cell wall organization
481	585	TS262	barcode set	CAGL0L06424g		YDR134C	AGGCAGATACGATTAGTACG	GCGAGACCGCTTTACCAGAT	TS_4	A	8	1	TEF1P-NAT1-TEF1T (based on pJK863)	HTL	Cell wall organization
482	586	TS262	barcode set	CAGL0L06424g		YDR134C	AGGCAGATACGATTAGTACG	GCGAGACCGCTTTACCAGAT	TS_4	A	8	2	TEF1P-NAT1-TEF1T (based on pJK863)	HTL	Cell wall organization
483	587	TS263	barcode set	CAGL0E02321g	PLB3	YOL011W	CCCTGTTATGAACCTTGATC	GCGAGACCGCTTTACCAGAT	TS_4	A	10	1	TEF1P-NAT1-TEF1T (based on pJK863)	HTL	Cell wall organization
484	588	TS263	barcode set	CAGL0E02321g	PLB3	YOL011W	CCCTGTTATGAACCTTGATC	GCGAGACCGCTTTACCAGAT	TS_4	A	10	1	TEF1P-NAT1-TEF1T (based on pJK863)	HTL	Cell wall organization
485	589	TS263	barcode set	CAGL0E02321g	PLB3	YOL011W	CCCTGTTATGAACCTTGATC	GCGAGACCGCTTTACCAGAT	TS_4	A	10	3	TEF1P-NAT1-TEF1T (based on pJK863)	HTL	Cell wall organization
486	590	TS264	barcode set	CAGL0E01419g	YPS3	YLR121C	AATCGACTGTAAGTATCGCG	GCGAGACCGCTTTACCAGAT	TS_4	A	11	1	TEF1P-NAT1-TEF1T (based on pJK863)	HTL	Cell wall organization
487	591	TS264	barcode set	CAGL0E01419g	YPS3	YLR121C	AATCGACTGTAAGTATCGCG	GCGAGACCGCTTTACCAGAT	TS_4	A	11	2	TEF1P-NAT1-TEF1T (based on pJK863)	HTL	Cell wall organization
488	592	TS264	barcode set	CAGL0E01419g	YPS3	YLR121C	AATCGACTGTAAGTATCGCG	GCGAGACCGCTTTACCAGAT	TS_4	A	11	3	TEF1P-NAT1-TEF1T (based on pJK863)	HTL	Cell wall organization
489	593	TS265	barcode set	CAGL0J08712g	FUN26	YAL022C	ATAGCCTTCTAAGAGCGGCG	GCGAGACCGCTTTACCAGAT	TS_4	A	12	1	TEF1P-NAT1-TEF1T (based on pJK863)	HTL	Transport
490	594	TS265	barcode set	CAGL0J08712g	FUN26	YAL022C	ATAGCCTTCTAAGAGCGGCG	GCGAGACCGCTTTACCAGAT	TS_4	A	12	2	TEF1P-NAT1-TEF1T (based on pJK863)	HTL	Transport
491	595	TS265	barcode set	CAGL0J08712g	FUN26	YAL022C	ATAGCCTTCTAAGAGCGGCG	GCGAGACCGCTTTACCAGAT	TS_4	A	12	3	TEF1P-NAT1-TEF1T (based on pJK863)	HTL	Transport
492	596	TS266	barcode set	CAGL0M08250g	ZRT3	YKL175W	GTGAGCGAAACACCGCGTAA	GCGAGACCGCTTTACCAGAT	TS_4	B	2	1	TEF1P-NAT1-TEF1T (based on pJK863)	HTL	Transport
493	597	TS266	barcode set	CAGL0M08250g	ZRT3	YKL175W	GTGAGCGAAACACCGCGTAA	GCGAGACCGCTTTACCAGAT	TS_4	B	2	2	TEF1P-NAT1-TEF1T (based on pJK863)	HTL	Transport
494	598	TS266	barcode set	CAGL0M08250g	ZRT3	YKL175W	GTGAGCGAAACACCGCGTAA	GCGAGACCGCTTTACCAGAT	TS_4	B	2	3	TEF1P-NAT1-TEF1T (based on pJK863)	HTL	Transport
495	599	TS267	barcode set	CAGL0C00693g	CCC1	YLR220W	GTGCGAACCAACGTACTACA	GCGAGACCGCTTTACCAGAT	TS_4	B	3	1	TEF1P-NAT1-TEF1T (based on pJK863)	HTL	Transport
496	600	TS267	barcode set	CAGL0C00693g	CCC1	YLR220W	GTGCGAACCAACGTACTACA	GCGAGACCGCTTTACCAGAT	TS_4	B	3	2	TEF1P-NAT1-TEF1T (based on pJK863)	HTL	Transport
497	601	TS268	barcode set	CAGL0M05533g	DUR1,2	YBR208C	AGTAGTACAGCCCGCGTCAT	GCGAGACCGCTTTACCAGAT	TS_4	B	5	1	TEF1P-NAT1-TEF1T (based on pJK863)	HTL	Other
498	602	TS268	barcode set	CAGL0M05533g	DUR1,2	YBR208C	AGTAGTACAGCCCGCGTCAT	GCGAGACCGCTTTACCAGAT	TS_4	B	5	2	TEF1P-NAT1-TEF1T (based on pJK863)	HTL	Other
499	603	TS268	barcode set	CAGL0M05533g	DUR1,2	YBR208C	AGTAGTACAGCCCGCGTCAT	GCGAGACCGCTTTACCAGAT	TS_4	B	5	3	TEF1P-NAT1-TEF1T (based on pJK863)	HTL	Other
500	604	TS269	barcode set	CAGL0L11110g	CNA1	YLR433C	GATTATACGCTATCCGAGGT	GACTCCGTACTCACTAGGAT	TS_4	B	8	1	TEF1P-NAT1-TEF1T (based on pJK863)	HTL	Signal transduction
501	605	TS269	barcode set	CAGL0L11110g	CNA1	YLR433C	GATTATACGCTATCCGAGGT	GACTCCGTACTCACTAGGAT	TS_4	B	8	2	TEF1P-NAT1-TEF1T (based on pJK863)	HTL	Signal transduction
502	606	TS270	barcode set	CAGL0F09097g	SKN7	YHR206W	CGGCCTAACTGTAATTGATC	GCGAGACCGCTTTACCAGAT	TS_4	B	11	1	TEF1P-NAT1-TEF1T (based on pJK863)	HTL	Transcriptional regulation
503	607	TS270	barcode set	CAGL0F09097g	SKN7	YHR206W	CGGCCTAACTGTAATTGATC	GCGAGACCGCTTTACCAGAT	TS_4	B	11	2	TEF1P-NAT1-TEF1T (based on pJK863)	HTL	Transcriptional regulation
504	608	TS270	barcode set	CAGL0F09097g	SKN7	YHR206W	CGGCCTAACTGTAATTGATC	GCGAGACCGCTTTACCAGAT	TS_4	B	11	3	TEF1P-NAT1-TEF1T (based on pJK863)	HTL	Transcriptional regulation
505	609	TS271	barcode set	CAGL0A01452g	CWH41	YGL027C	CGGACGGTATTCATTCATCT	GCGAGACCGCTTTACCAGAT	TS_4	C	3	1	TEF1P-NAT1-TEF1T (based on pJK863)	HTL	Cell wall organization
506	610	TS271	barcode set	CAGL0A01452g	CWH41	YGL027C	CGGACGGTATTCATTCATCT	GCGAGACCGCTTTACCAGAT	TS_4	C	3	2	TEF1P-NAT1-TEF1T (based on pJK863)	HTL	Cell wall organization
507	611	TS271	barcode set	CAGL0A01452g	CWH41	YGL027C	CGGACGGTATTCATTCATCT	GCGAGACCGCTTTACCAGAT	TS_4	C	3	3	TEF1P-NAT1-TEF1T (based on pJK863)	HTL	Cell wall organization
508	612	TS272	barcode set	CAGL0A01584g	AGA2	YGL032C	GTGAGCGAAACACCGCGTAA	GCGAGACCGCTTTACCAGAT	TS_4	C	4	1	TEF1P-NAT1-TEF1T (based on pJK863)	HTL	Other
509	613	TS272	barcode set	CAGL0A01584g	AGA2	YGL032C	GTGAGCGAAACACCGCGTAA	GCGAGACCGCTTTACCAGAT	TS_4	C	4	2	TEF1P-NAT1-TEF1T (based on pJK863)	HTL	Other
510	614	TS272	barcode set	CAGL0A01584g	AGA2	YGL032C	GTGAGCGAAACACCGCGTAA	GCGAGACCGCTTTACCAGAT	TS_4	C	4	3	TEF1P-NAT1-TEF1T (based on pJK863)	HTL	Other
511	615	TS273	barcode set	CAGL0A02486g	SBE2	YDR351W	GTGCGAACCAACGTACTACA	GCGAGACCGCTTTACCAGAT	TS_4	C	5	1	TEF1P-NAT1-TEF1T (based on pJK863)	HTL	Cell wall organization
512	616	TS273	barcode set	CAGL0A02486g	SBE2	YDR351W	GTGCGAACCAACGTACTACA	GCGAGACCGCTTTACCAGAT	TS_4	C	5	2	TEF1P-NAT1-TEF1T (based on pJK863)	HTL	Cell wall organization
513	617	TS273	barcode set	CAGL0A02486g	SBE2	YDR351W	GTGCGAACCAACGTACTACA	GCGAGACCGCTTTACCAGAT	TS_4	C	5	3	TEF1P-NAT1-TEF1T (based on pJK863)	HTL	Cell wall organization
514	618	TS274	barcode set	CAGL0A04411g	SKT5	YBL061C	GGGTACTCCACAACATTACA	GCGAGACCGCTTTACCAGAT	TS_4	C	6	1	TEF1P-NAT1-TEF1T (based on pJK863)	HTL	Other
515	619	TS274	barcode set	CAGL0A04411g	SKT5	YBL061C	GGGTACTCCACAACATTACA	GCGAGACCGCTTTACCAGAT	TS_4	C	6	2	TEF1P-NAT1-TEF1T (based on pJK863)	HTL	Other
516	620	TS274	barcode set	CAGL0A04411g	SKT5	YBL061C	GGGTACTCCACAACATTACA	GCGAGACCGCTTTACCAGAT	TS_4	C	6	3	TEF1P-NAT1-TEF1T (based on pJK863)	HTL	Other
517	621	TS275	barcode set	CAGL0B00528g	LRE1	YCL051W	GCTAATCGCTAATTCGTTCC	GCGAGACCGCTTTACCAGAT	TS_4	C	7	1	TEF1P-NAT1-TEF1T (based on pJK863)	HTL	Cell wall organization
518	622	TS275	barcode set	CAGL0B00528g	LRE1	YCL051W	GCTAATCGCTAATTCGTTCC	GCGAGACCGCTTTACCAGAT	TS_4	C	7	2	TEF1P-NAT1-TEF1T (based on pJK863)	HTL	Cell wall organization
519	623	TS275	barcode set	CAGL0B00528g	LRE1	YCL051W	GCTAATCGCTAATTCGTTCC	GCGAGACCGCTTTACCAGAT	TS_4	C	7	3	TEF1P-NAT1-TEF1T (based on pJK863)	HTL	Cell wall organization
520	624	TS276	barcode set	CAGL0B01969g	ECM18	YDR125C	GCATTAACGGGAACTAGAGC	GCGAGACCGCTTTACCAGAT	TS_4	C	8	1	TEF1P-NAT1-TEF1T (based on pJK863)	HTL	Other
521	625	TS276	barcode set	CAGL0B01969g	ECM18	YDR125C	GCATTAACGGGAACTAGAGC	GCGAGACCGCTTTACCAGAT	TS_4	C	8	2	TEF1P-NAT1-TEF1T (based on pJK863)	HTL	Other
522	626	TS276	barcode set	CAGL0B01969g	ECM18	YDR125C	GCATTAACGGGAACTAGAGC	GCGAGACCGCTTTACCAGAT	TS_4	C	8	3	TEF1P-NAT1-TEF1T (based on pJK863)	HTL	Other
523	627	TS277	barcode set	CAGL0B04389g	CHS3	YBR023C	GCCATTCGTATAACCGTGTC	GCGAGACCGCTTTACCAGAT	TS_4	C	9	1	TEF1P-NAT1-TEF1T (based on pJK863)	HTL	Cell wall organization
524	628	TS277	barcode set	CAGL0B04389g	CHS3	YBR023C	GCCATTCGTATAACCGTGTC	GCGAGACCGCTTTACCAGAT	TS_4	C	9	2	TEF1P-NAT1-TEF1T (based on pJK863)	HTL	Cell wall organization
525	629	TS277	barcode set	CAGL0B04389g	CHS3	YBR023C	GCCATTCGTATAACCGTGTC	GCGAGACCGCTTTACCAGAT	TS_4	C	9	3	TEF1P-NAT1-TEF1T (based on pJK863)	HTL	Cell wall organization
526	630	TS278	barcode set	CAGL0B04565g	KTR1	YOR099W	GATTATACGCTATCCGAGGT	GCGAGACCGCTTTACCAGAT	TS_4	C	10	1	TEF1P-NAT1-TEF1T (based on pJK863)	HTL	Cell wall organization
527	631	TS278	barcode set	CAGL0B04565g	KTR1	YOR099W	GATTATACGCTATCCGAGGT	GCGAGACCGCTTTACCAGAT	TS_4	C	10	2	TEF1P-NAT1-TEF1T (based on pJK863)	HTL	Cell wall organization
528	632	TS278	barcode set	CAGL0B04565g	KTR1	YOR099W	GATTATACGCTATCCGAGGT	GCGAGACCGCTTTACCAGAT	TS_4	C	10	3	TEF1P-NAT1-TEF1T (based on pJK863)	HTL	Cell wall organization
529	633	TS279	barcode set	CAGL0B04631g	INP53	YOR109W	GTATTCCGACTGCGGCACTT	GCGAGACCGCTTTACCAGAT	TS_4	C	11	1	TEF1P-NAT1-TEF1T (based on pJK863)	HTL	Signal transduction
530	634	TS279	barcode set	CAGL0B04631g	INP53	YOR109W	GTATTCCGACTGCGGCACTT	GCGAGACCGCTTTACCAGAT	TS_4	C	11	2	TEF1P-NAT1-TEF1T (based on pJK863)	HTL	Signal transduction
531	635	TS280	barcode set	CAGL0C05599g	LRG1	YDL240W	ATTAGCGTCTCGACTACCTT	GCGAGACCGCTTTACCAGAT	TS_4	D	4	1	TEF1P-NAT1-TEF1T (based on pJK863)	HTL	Signal transduction
532	636	TS280	barcode set	CAGL0C05599g	LRG1	YDL240W	ATTAGCGTCTCGACTACCTT	GCGAGACCGCTTTACCAGAT	TS_4	D	4	2	TEF1P-NAT1-TEF1T (based on pJK863)	HTL	Signal transduction
533	637	TS281	barcode set	CAGL0D00220g	ECM1	YAL059W	ACCGACGGCTTAGCGATCTT	GCGAGACCGCTTTACCAGAT	TS_4	D	5	1	TEF1P-NAT1-TEF1T (based on pJK863)	HTL	Cell wall organization
534	638	TS281	barcode set	CAGL0D00220g	ECM1	YAL059W	ACCGACGGCTTAGCGATCTT	GCGAGACCGCTTTACCAGAT	TS_4	D	5	2	TEF1P-NAT1-TEF1T (based on pJK863)	HTL	Cell wall organization
535	639	TS281	barcode set	CAGL0D00220g	ECM1	YAL059W	ACCGACGGCTTAGCGATCTT	GCGAGACCGCTTTACCAGAT	TS_4	D	5	3	TEF1P-NAT1-TEF1T (based on pJK863)	HTL	Cell wall organization
536	640	TS282	barcode set	CAGL0D01034g	PSA1	YDL055C	ACTAGATACACATGCGTGCC	GCGAGACCGCTTTACCAGAT	TS_4	D	6	1	TEF1P-NAT1-TEF1T (based on pJK863)	HTL	Cell wall organization
537	641	TS282	barcode set	CAGL0D01034g	PSA1	YDL055C	ACTAGATACACATGCGTGCC	GCGAGACCGCTTTACCAGAT	TS_4	D	6	2	TEF1P-NAT1-TEF1T (based on pJK863)	HTL	Cell wall organization
538	642	TS283	barcode set	CAGL0D03256g	YEH2	YLR020C	CCGACCGTATAAGTTCTATC	GCGAGACCGCTTTACCAGAT	TS_4	D	7	1	TEF1P-NAT1-TEF1T (based on pJK863)	HTL	Cell wall organization
539	643	TS283	barcode set	CAGL0D03256g	YEH2	YLR020C	CCGACCGTATAAGTTCTATC	GCGAGACCGCTTTACCAGAT	TS_4	D	7	2	TEF1P-NAT1-TEF1T (based on pJK863)	HTL	Cell wall organization
540	644	TS283	barcode set	CAGL0D03256g	YEH2	YLR020C	CCGACCGTATAAGTTCTATC	GCGAGACCGCTTTACCAGAT	TS_4	D	7	3	TEF1P-NAT1-TEF1T (based on pJK863)	HTL	Cell wall organization
541	645	TS284	barcode set	CAGL0D06622g	SPA2	YLL021W	CAGAGTAAGTAACGGTTCGC	GCGAGACCGCTTTACCAGAT	TS_4	D	9	1	TEF1P-NAT1-TEF1T (based on pJK863)	HTL	Other
542	646	TS284	barcode set	CAGL0D06622g	SPA2	YLL021W	CAGAGTAAGTAACGGTTCGC	GCGAGACCGCTTTACCAGAT	TS_4	D	9	2	TEF1P-NAT1-TEF1T (based on pJK863)	HTL	Other
543	647	TS284	barcode set	CAGL0D06622g	SPA2	YLL021W	CAGAGTAAGTAACGGTTCGC	GCGAGACCGCTTTACCAGAT	TS_4	D	9	3	TEF1P-NAT1-TEF1T (based on pJK863)	HTL	Other
544	648	TS285	barcode set	CAGL0E01353g	ZRT2	YLR130C	CCGGCTAGTTAATTTGACTC	GCGAGACCGCTTTACCAGAT	TS_4	D	10	1	TEF1P-NAT1-TEF1T (based on pJK863)	HTL	Transport
545	649	TS285	barcode set	CAGL0E01353g	ZRT2	YLR130C	CCGGCTAGTTAATTTGACTC	GCGAGACCGCTTTACCAGAT	TS_4	D	10	2	TEF1P-NAT1-TEF1T (based on pJK863)	HTL	Transport
546	650	TS285	barcode set	CAGL0E01353g	ZRT2	YLR130C	CCGGCTAGTTAATTTGACTC	GCGAGACCGCTTTACCAGAT	TS_4	D	10	3	TEF1P-NAT1-TEF1T (based on pJK863)	HTL	Transport
547	651	TS286	barcode set	CAGL0E02783g	SLA1	YBL007C	TAGTGACTTAGACCCTCCGT	GCGAGACCGCTTTACCAGAT	TS_4	E	1	1	TEF1P-NAT1-TEF1T (based on pJK863)	HTL	Cell wall organization
548	652	TS286	barcode set	CAGL0E02783g	SLA1	YBL007C	TAGTGACTTAGACCCTCCGT	GCGAGACCGCTTTACCAGAT	TS_4	E	1	2	TEF1P-NAT1-TEF1T (based on pJK863)	HTL	Cell wall organization
549	653	TS286	barcode set	CAGL0E02783g	SLA1	YBL007C	TAGTGACTTAGACCCTCCGT	GCGAGACCGCTTTACCAGAT	TS_4	E	1	3	TEF1P-NAT1-TEF1T (based on pJK863)	HTL	Cell wall organization
550	654	TS287	barcode set	CAGL0E02915g	SCW11	YGL028C	TATAGTTCGGGCCATACGGT	GCGAGACCGCTTTACCAGAT	TS_4	E	2	1	TEF1P-NAT1-TEF1T (based on pJK863)	HTL	Cell wall organization
551	655	TS287	barcode set	CAGL0E02915g	SCW11	YGL028C	TATAGTTCGGGCCATACGGT	GCGAGACCGCTTTACCAGAT	TS_4	E	2	2	TEF1P-NAT1-TEF1T (based on pJK863)	HTL	Cell wall organization
552	656	TS287	barcode set	CAGL0E02915g	SCW11	YGL028C	TATAGTTCGGGCCATACGGT	GCGAGACCGCTTTACCAGAT	TS_4	E	2	3	TEF1P-NAT1-TEF1T (based on pJK863)	HTL	Cell wall organization
553	657	TS288	barcode set	CAGL0F02453g	ECM25	YJL201W	TATTCTCCGTGACGCGGGTT	GCGAGACCGCTTTACCAGAT	TS_4	E	8	1	TEF1P-NAT1-TEF1T (based on pJK863)	HTL	Other
554	658	TS288	barcode set	CAGL0F02453g	ECM25	YJL201W	TATTCTCCGTGACGCGGGTT	GCGAGACCGCTTTACCAGAT	TS_4	E	8	2	TEF1P-NAT1-TEF1T (based on pJK863)	HTL	Other
555	659	TS288	barcode set	CAGL0F02453g	ECM25	YJL201W	TATTCTCCGTGACGCGGGTT	GCGAGACCGCTTTACCAGAT	TS_4	E	8	3	TEF1P-NAT1-TEF1T (based on pJK863)	HTL	Other
556	660	TS289	barcode set	CAGL0F03003g	HKR1	YDR420W	AATCGGTACTAAGTCGGTTC	GCGAGACCGCTTTACCAGAT	TS_4	E	9	1	TEF1P-NAT1-TEF1T (based on pJK863)	HTL	Cell wall organization
557	661	TS289	barcode set	CAGL0F03003g	HKR1	YDR420W	AATCGGTACTAAGTCGGTTC	GCGAGACCGCTTTACCAGAT	TS_4	E	9	2	TEF1P-NAT1-TEF1T (based on pJK863)	HTL	Cell wall organization
558	662	TS289	barcode set	CAGL0F03003g	HKR1	YDR420W	AATCGGTACTAAGTCGGTTC	GCGAGACCGCTTTACCAGAT	TS_4	E	9	3	TEF1P-NAT1-TEF1T (based on pJK863)	HTL	Cell wall organization
559	663	TS290	barcode set	CAGL0F04521g	ECM13	YBL043W	GCGCTGCAATCAGAAAGGTA	GCGAGACCGCTTTACCAGAT	TS_4	E	12	1	TEF1P-NAT1-TEF1T (based on pJK863)	HTL	Cell wall organization
560	664	TS290	barcode set	CAGL0F04521g	ECM13	YBL043W	GCGCTGCAATCAGAAAGGTA	GCGAGACCGCTTTACCAGAT	TS_4	E	12	2	TEF1P-NAT1-TEF1T (based on pJK863)	HTL	Cell wall organization
561	665	TS290	barcode set	CAGL0F04521g	ECM13	YBL043W	GCGCTGCAATCAGAAAGGTA	GCGAGACCGCTTTACCAGAT	TS_4	E	12	3	TEF1P-NAT1-TEF1T (based on pJK863)	HTL	Cell wall organization
562	666	TS291	barcode set	CAGL0F04873g	KRE6	YPR159W	AGCATGTCTCTAACTGGACG	GCGAGACCGCTTTACCAGAT	TS_4	F	1	1	TEF1P-NAT1-TEF1T (based on pJK863)	HTL	Cell wall organization
563	667	TS291	barcode set	CAGL0F04873g	KRE6	YPR159W	AGCATGTCTCTAACTGGACG	GCGAGACCGCTTTACCAGAT	TS_4	F	1	2	TEF1P-NAT1-TEF1T (based on pJK863)	HTL	Cell wall organization
564	668	TS291	barcode set	CAGL0F04873g	KRE6	YPR159W	AGCATGTCTCTAACTGGACG	GCGAGACCGCTTTACCAGAT	TS_4	F	1	3	TEF1P-NAT1-TEF1T (based on pJK863)	HTL	Cell wall organization
565	669	TS292	barcode set	CAGL0F06501g	ECM40	YMR062C	ATATAGCGTGACAGAGTACG	GCGAGACCGCTTTACCAGAT	TS_4	F	2	1	TEF1P-NAT1-TEF1T (based on pJK863)	HTL	Cell wall organization
566	670	TS292	barcode set	CAGL0F06501g	ECM40	YMR062C	ATATAGCGTGACAGAGTACG	GCGAGACCGCTTTACCAGAT	TS_4	F	2	2	TEF1P-NAT1-TEF1T (based on pJK863)	HTL	Cell wall organization
567	671	TS292	barcode set	CAGL0F06501g	ECM40	YMR062C	ATATAGCGTGACAGAGTACG	GCGAGACCGCTTTACCAGAT	TS_4	F	2	3	TEF1P-NAT1-TEF1T (based on pJK863)	HTL	Cell wall organization
568	672	TS293	barcode set	CAGL0G00814g	CHS5	YLR330W	CGACTATTGTGACATACCTG	GCGAGACCGCTTTACCAGAT	TS_4	F	5	1	TEF1P-NAT1-TEF1T (based on pJK863)	HTL	Vacuole, Golgi
569	673	TS293	barcode set	CAGL0G00814g	CHS5	YLR330W	CGACTATTGTGACATACCTG	GCGAGACCGCTTTACCAGAT	TS_4	F	5	2	TEF1P-NAT1-TEF1T (based on pJK863)	HTL	Vacuole, Golgi
570	674	TS294	barcode set	CAGL0G02101g	ECM4	YKR076W	TGGATTCGACTCGCTCGCAT	GCGAGACCGCTTTACCAGAT	TS_4	F	6	1	TEF1P-NAT1-TEF1T (based on pJK863)	HTL	Other
571	675	TS294	barcode set	CAGL0G02101g	ECM4	YKR076W	TGGATTCGACTCGCTCGCAT	GCGAGACCGCTTTACCAGAT	TS_4	F	6	2	TEF1P-NAT1-TEF1T (based on pJK863)	HTL	Other
572	676	TS294	barcode set	CAGL0G02101g	ECM4	YKR076W	TGGATTCGACTCGCTCGCAT	GCGAGACCGCTTTACCAGAT	TS_4	F	6	3	TEF1P-NAT1-TEF1T (based on pJK863)	HTL	Other
573	677	TS295	barcode set	CAGL0G02343g	TVP38	YKR088C	ATTTCGGCACGCTCACGATG	GCGAGACCGCTTTACCAGAT	TS_4	F	7	1	TEF1P-NAT1-TEF1T (based on pJK863)	HTL	Vacuole, Golgi
574	678	TS295	barcode set	CAGL0G02343g	TVP38	YKR088C	ATTTCGGCACGCTCACGATG	GCGAGACCGCTTTACCAGAT	TS_4	F	7	2	TEF1P-NAT1-TEF1T (based on pJK863)	HTL	Vacuole, Golgi
575	679	TS295	barcode set	CAGL0G02343g	TVP38	YKR088C	ATTTCGGCACGCTCACGATG	GCGAGACCGCTTTACCAGAT	TS_4	F	7	3	TEF1P-NAT1-TEF1T (based on pJK863)	HTL	Vacuole, Golgi
576	680	TS296	barcode set	CAGL0G05566g	FMP45	YDL222C	GAGCTTGACTCACCGTCTTG	GCGAGACCGCTTTACCAGAT	TS_4	F	8	1	TEF1P-NAT1-TEF1T (based on pJK863)	HTL	Cell wall organization
577	681	TS296	barcode set	CAGL0G05566g	FMP45	YDL222C	GAGCTTGACTCACCGTCTTG	GCGAGACCGCTTTACCAGAT	TS_4	F	8	2	TEF1P-NAT1-TEF1T (based on pJK863)	HTL	Cell wall organization
578	682	TS296	barcode set	CAGL0G05566g	FMP45	YDL222C	GAGCTTGACTCACCGTCTTG	GCGAGACCGCTTTACCAGAT	TS_4	F	8	3	TEF1P-NAT1-TEF1T (based on pJK863)	HTL	Cell wall organization
579	683	TS297	barcode set	CAGL0G05918g	CHS7	YHR142W	GCGGCGGATATGCTATAAAT	GCGAGACCGCTTTACCAGAT	TS_4	F	9	1	TEF1P-NAT1-TEF1T (based on pJK863)	HTL	Other
580	684	TS297	barcode set	CAGL0G05918g	CHS7	YHR142W	GCGGCGGATATGCTATAAAT	GCGAGACCGCTTTACCAGAT	TS_4	F	9	2	TEF1P-NAT1-TEF1T (based on pJK863)	HTL	Other
581	685	TS297	barcode set	CAGL0G05918g	CHS7	YHR142W	GCGGCGGATATGCTATAAAT	GCGAGACCGCTTTACCAGAT	TS_4	F	9	3	TEF1P-NAT1-TEF1T (based on pJK863)	HTL	Other
582	686	TS298	barcode set	CAGL0G05918g	CHS7	YHR142W	TACTCGGCAACAGGTCGGTA	GCGAGACCGCTTTACCAGAT	TS_4	F	10	1	TEF1P-NAT1-TEF1T (based on pJK863)	HTL	Other
583	687	TS298	barcode set	CAGL0G05918g	CHS7	YHR142W	TACTCGGCAACAGGTCGGTA	GCGAGACCGCTTTACCAGAT	TS_4	F	10	2	TEF1P-NAT1-TEF1T (based on pJK863)	HTL	Other
584	688	TS298	barcode set	CAGL0G05918g	CHS7	YHR142W	TACTCGGCAACAGGTCGGTA	GCGAGACCGCTTTACCAGAT	TS_4	F	10	3	TEF1P-NAT1-TEF1T (based on pJK863)	HTL	Other
585	689	TS299	barcode set	CAGL0G06754g	CDC10	YCR002C	TATGGCACCACACGAAGGAC	GCGAGACCGCTTTACCAGAT	TS_4	F	11	1	TEF1P-NAT1-TEF1T (based on pJK863)	HTL	Cell wall organization
586	690	TS299	barcode set	CAGL0G06754g	CDC10	YCR002C	TATGGCACCACACGAAGGAC	GCGAGACCGCTTTACCAGAT	TS_4	F	11	2	TEF1P-NAT1-TEF1T (based on pJK863)	HTL	Cell wall organization
587	691	TS299	barcode set	CAGL0G06754g	CDC10	YCR002C	TATGGCACCACACGAAGGAC	GCGAGACCGCTTTACCAGAT	TS_4	F	11	3	TEF1P-NAT1-TEF1T (based on pJK863)	HTL	Cell wall organization
588	692	TS300	barcode set	CAGL0H00847g	HUT1	YPL244C	GCCCACATGGATAACATTAC	GCGAGACCGCTTTACCAGAT	TS_4	G	1	1	TEF1P-NAT1-TEF1T (based on pJK863)	HTL	Transport
589	693	TS300	barcode set	CAGL0H00847g	HUT1	YPL244C	GCCCACATGGATAACATTAC	GCGAGACCGCTTTACCAGAT	TS_4	G	1	2	TEF1P-NAT1-TEF1T (based on pJK863)	HTL	Transport
590	694	TS301	barcode set	CAGL0H01287g	SSD1	YDR293C	AGACTAAGACCATTGTACCC	GCGAGACCGCTTTACCAGAT	TS_4	G	2	1	TEF1P-NAT1-TEF1T (based on pJK863)	HTL	Cell wall organization
591	695	TS301	barcode set	CAGL0H01287g	SSD1	YDR293C	AGACTAAGACCATTGTACCC	GCGAGACCGCTTTACCAGAT	TS_4	G	2	2	TEF1P-NAT1-TEF1T (based on pJK863)	HTL	Cell wall organization
592	696	TS301	barcode set	CAGL0H01287g	SSD1	YDR293C	AGACTAAGACCATTGTACCC	GCGAGACCGCTTTACCAGAT	TS_4	G	2	3	TEF1P-NAT1-TEF1T (based on pJK863)	HTL	Cell wall organization
593	697	TS302	barcode set	CAGL0H05005g	CSR1	YLR380W	TAGCCAGTAACAGTAGGCCC	GCGAGACCGCTTTACCAGAT	TS_4	G	3	1	TEF1P-NAT1-TEF1T (based on pJK863)	HTL	Transport
594	698	TS302	barcode set	CAGL0H05005g	CSR1	YLR380W	TAGCCAGTAACAGTAGGCCC	GCGAGACCGCTTTACCAGAT	TS_4	G	3	2	TEF1P-NAT1-TEF1T (based on pJK863)	HTL	Transport
595	699	TS302	barcode set	CAGL0H05005g	CSR1	YLR380W	TAGCCAGTAACAGTAGGCCC	GCGAGACCGCTTTACCAGAT	TS_4	G	3	3	TEF1P-NAT1-TEF1T (based on pJK863)	HTL	Transport
596	700	TS303	barcode set	CAGL0H06435g	ECM19	YLR390W	GCCCAAATAAGACGTGAGCC	GCGAGACCGCTTTACCAGAT	TS_4	G	4	1	TEF1P-NAT1-TEF1T (based on pJK863)	HTL	Cell wall organization
597	701	TS303	barcode set	CAGL0H06435g	ECM19	YLR390W	GCCCAAATAAGACGTGAGCC	GCGAGACCGCTTTACCAGAT	TS_4	G	4	2	TEF1P-NAT1-TEF1T (based on pJK863)	HTL	Cell wall organization
598	702	TS303	barcode set	CAGL0H06435g	ECM19	YLR390W	GCCCAAATAAGACGTGAGCC	GCGAGACCGCTTTACCAGAT	TS_4	G	4	3	TEF1P-NAT1-TEF1T (based on pJK863)	HTL	Cell wall organization
599	703	TS304	barcode set	CAGL0H06545g	ECM37	YIL146C	TAAGAATCGTTAGCAAGGCC	GCGAGACCGCTTTACCAGAT	TS_4	G	5	1	TEF1P-NAT1-TEF1T (based on pJK863)	HTL	Cell wall organization
600	704	TS304	barcode set	CAGL0H06545g	ECM37	YIL146C	TAAGAATCGTTAGCAAGGCC	GCGAGACCGCTTTACCAGAT	TS_4	G	5	2	TEF1P-NAT1-TEF1T (based on pJK863)	HTL	Cell wall organization
601	705	TS305	barcode set	CAGL0H07403g	KRE2	YDR483W	AGAGATTCGCTTAACGCCCG	GCGAGACCGCTTTACCAGAT	TS_4	G	6	1	TEF1P-NAT1-TEF1T (based on pJK863)	HTL	Cell wall organization
602	706	TS305	barcode set	CAGL0H07403g	KRE2	YDR483W	AGAGATTCGCTTAACGCCCG	GCGAGACCGCTTTACCAGAT	TS_4	G	6	2	TEF1P-NAT1-TEF1T (based on pJK863)	HTL	Cell wall organization
603	707	TS306	barcode set	CAGL0M07381g	KTR6	YPL053C	CATAAGCGTTGTGAATCGCG	GCGAGACCGCTTTACCAGAT	TS_4	G	7	1	TEF1P-NAT1-TEF1T (based on pJK863)	HTL	Cell wall organization
604	708	TS306	barcode set	CAGL0M07381g	KTR6	YPL053C	CATAAGCGTTGTGAATCGCG	GCGAGACCGCTTTACCAGAT	TS_4	G	7	2	TEF1P-NAT1-TEF1T (based on pJK863)	HTL	Cell wall organization
605	709	TS306	barcode set	CAGL0M07381g	KTR6	YPL053C	CATAAGCGTTGTGAATCGCG	GCGAGACCGCTTTACCAGAT	TS_4	G	7	3	TEF1P-NAT1-TEF1T (based on pJK863)	HTL	Cell wall organization
606	710	TS307	barcode set	CAGL0I00484g	EXG1	YLR300W	TTCACCGAGACAAGGCGAGA	GCGAGACCGCTTTACCAGAT	TS_4	G	9	1	TEF1P-NAT1-TEF1T (based on pJK863)	HTL	Cell wall organization
607	711	TS307	barcode set	CAGL0I00484g	EXG1	YLR300W	TTCACCGAGACAAGGCGAGA	GCGAGACCGCTTTACCAGAT	TS_4	G	9	2	TEF1P-NAT1-TEF1T (based on pJK863)	HTL	Cell wall organization
608	712	TS307	barcode set	CAGL0I00484g	EXG1	YLR300W	TTCACCGAGACAAGGCGAGA	GCGAGACCGCTTTACCAGAT	TS_4	G	9	3	TEF1P-NAT1-TEF1T (based on pJK863)	HTL	Cell wall organization
609	713	TS308	barcode set	CAGL0I01188g	CDC12	YHR107C	TCCATACCGATAAAGCTCGA	GCGAGACCGCTTTACCAGAT	TS_4	G	10	1	TEF1P-NAT1-TEF1T (based on pJK863)	HTL	Signal transduction
610	714	TS308	barcode set	CAGL0I01188g	CDC12	YHR107C	TCCATACCGATAAAGCTCGA	GCGAGACCGCTTTACCAGAT	TS_4	G	10	2	TEF1P-NAT1-TEF1T (based on pJK863)	HTL	Signal transduction
611	715	TS308	barcode set	CAGL0I01188g	CDC12	YHR107C	TCCATACCGATAAAGCTCGA	GCGAGACCGCTTTACCAGAT	TS_4	G	10	3	TEF1P-NAT1-TEF1T (based on pJK863)	HTL	Signal transduction
612	716	TS309	barcode set	CAGL0I06160g	CIS3	YJL158C	TACTGACGCGGGACTGACTT	GCGAGACCGCTTTACCAGAT	TS_4	G	11	1	TEF1P-NAT1-TEF1T (based on pJK863)	HTL	Cell wall organization
613	717	TS309	barcode set	CAGL0I06160g	CIS3	YJL158C	TACTGACGCGGGACTGACTT	GCGAGACCGCTTTACCAGAT	TS_4	G	11	2	TEF1P-NAT1-TEF1T (based on pJK863)	HTL	Cell wall organization
614	718	TS309	barcode set	CAGL0I06160g	CIS3	YJL158C	TACTGACGCGGGACTGACTT	GCGAGACCGCTTTACCAGAT	TS_4	G	11	3	TEF1P-NAT1-TEF1T (based on pJK863)	HTL	Cell wall organization
615	719	TS310	barcode set	CAGL0I06182g	PIR1	YKL164C	TAACTGCCGCGAGTCGTCTT	GCGAGACCGCTTTACCAGAT	TS_4	G	12	1	TEF1P-NAT1-TEF1T (based on pJK863)	HTL	Cell wall organization
616	720	TS310	barcode set	CAGL0I06182g	PIR1	YKL164C	TAACTGCCGCGAGTCGTCTT	GCGAGACCGCTTTACCAGAT	TS_4	G	12	2	TEF1P-NAT1-TEF1T (based on pJK863)	HTL	Cell wall organization
617	721	TS310	barcode set	CAGL0I06182g	PIR1	YKL164C	TAACTGCCGCGAGTCGTCTT	GCGAGACCGCTTTACCAGAT	TS_4	G	12	3	TEF1P-NAT1-TEF1T (based on pJK863)	HTL	Cell wall organization
618	722	TS311	barcode set	CAGL0G04609g	PKH2	YOL100W	AAGCCAAACGAACTTGCGGC	GCGAGACCGCTTTACCAGAT	TS_4	H	4	1	TEF1P-NAT1-TEF1T (based on pJK863)	HTL	Signal transduction
619	723	TS311	barcode set	CAGL0G04609g	PKH2	YOL100W	AAGCCAAACGAACTTGCGGC	GCGAGACCGCTTTACCAGAT	TS_4	H	4	2	TEF1P-NAT1-TEF1T (based on pJK863)	HTL	Signal transduction
620	724	TS311	barcode set	CAGL0G04609g	PKH2	YOL100W	AAGCCAAACGAACTTGCGGC	GCGAGACCGCTTTACCAGAT	TS_4	H	4	3	TEF1P-NAT1-TEF1T (based on pJK863)	HTL	Signal transduction
621	725	TS312	barcode set	CAGL0I08855g	KRE11	YGR166W	TACCTATTGACCAGTGGGCG	GCGAGACCGCTTTACCAGAT	TS_4	H	6	1	TEF1P-NAT1-TEF1T (based on pJK863)	HTL	Vacuole, Golgi
622	726	TS312	barcode set	CAGL0I08855g	KRE11	YGR166W	TACCTATTGACCAGTGGGCG	GCGAGACCGCTTTACCAGAT	TS_4	H	6	2	TEF1P-NAT1-TEF1T (based on pJK863)	HTL	Vacuole, Golgi
623	727	TS312	barcode set	CAGL0I08855g	KRE11	YGR166W	TACCTATTGACCAGTGGGCG	GCGAGACCGCTTTACCAGAT	TS_4	H	6	3	TEF1P-NAT1-TEF1T (based on pJK863)	HTL	Vacuole, Golgi
624	728	TS313	barcode set	CAGL0J00253g	MTL1	YGR023W	CCTAGAGACGTAGATATGCG	GCGAGACCGCTTTACCAGAT	TS_4	H	8	1	TEF1P-NAT1-TEF1T (based on pJK863)	HTL	Signal transduction
625	729	TS313	barcode set	CAGL0J00253g	MTL1	YGR023W	CCTAGAGACGTAGATATGCG	GCGAGACCGCTTTACCAGAT	TS_4	H	8	2	TEF1P-NAT1-TEF1T (based on pJK863)	HTL	Signal transduction
626	730	TS313	barcode set	CAGL0J00253g	MTL1	YGR023W	CCTAGAGACGTAGATATGCG	GCGAGACCGCTTTACCAGAT	TS_4	H	8	3	TEF1P-NAT1-TEF1T (based on pJK863)	HTL	Signal transduction
627	731	TS314	barcode set	CAGL0J00803g	MHP1	YJL042W	ACACCGTATTTAAGACTGCG	GCGAGACCGCTTTACCAGAT	TS_4	H	9	1	TEF1P-NAT1-TEF1T (based on pJK863)	HTL	Other
628	732	TS314	barcode set	CAGL0J00803g	MHP1	YJL042W	ACACCGTATTTAAGACTGCG	GCGAGACCGCTTTACCAGAT	TS_4	H	9	1	TEF1P-NAT1-TEF1T (based on pJK863)	HTL	Other
629	733	TS315	barcode set	CAGL0J02134g	INP51	YIL002C	ATCTCGCGTGACGATAGGCT	GCGAGACCGCTTTACCAGAT	TS_4	H	10	1	TEF1P-NAT1-TEF1T (based on pJK863)	HTL	Signal transduction
630	734	TS315	barcode set	CAGL0J00803g	MHP1	YJL042W	ATCTCGCGTGACGATAGGCT	GCGAGACCGCTTTACCAGAT	TS_4	H	10	1	TEF1P-NAT1-TEF1T (based on pJK863)	HTL	Other
631	735	TS316	barcode set	CAGL0J03366g	RMD7	YER083C	AGGAGCTTGTCTAATATCGG	GCGAGACCGCTTTACCAGAT	TS_4	H	12	1	TEF1P-NAT1-TEF1T (based on pJK863)	HTL	Vacuole, Golgi
632	736	TS316	barcode set	CAGL0J03366g	RMD7	YER083C	AGGAGCTTGTCTAATATCGG	GCGAGACCGCTTTACCAGAT	TS_4	H	12	1	TEF1P-NAT1-TEF1T (based on pJK863)	HTL	Vacuole, Golgi
633	737	TS316	barcode set	CAGL0J03366g	RMD7	YER083C	AGGAGCTTGTCTAATATCGG	GCGAGACCGCTTTACCAGAT	TS_4	H	12	1	TEF1P-NAT1-TEF1T (based on pJK863)	HTL	Vacuole, Golgi
634	738	TS257	barcode set	CAGL0K05841g	HAP1	YLR256W	CGATTCGATAAATGACGCGA	GCGAGACCGCTTTACCAGAT	TS_4	A	2	3	TEF1P-NAT1-TEF1T (based on pJK863)	HTL	Transcriptional regulation
635	742	TS259	barcode set	CAGL0G06072g	ECM14	YHR132C	TACTCGGCAACAGGTCGGTA	GCGAGACCGCTTTACCAGAT	TS_4	F	10	1	TEF1P-NAT1-TEF1T (based on pJK863)	HTL	Cell wall organization
636	743	TS260	barcode set	CAGL0E02761g	LDB7	YBL006C	GGTGTACCTCCAACTTACTA	GCGAGACCGCTTTACCAGAT	TS_4	D	12	1	TEF1P-NAT1-TEF1T (based on pJK863)	HTL	Chromatin
637	744	TS260	barcode set	CAGL0E02761g	LDB7	YBL006C	GGTGTACCTCCAACTTACTA	GCGAGACCGCTTTACCAGAT	TS_4	D	12	2	TEF1P-NAT1-TEF1T (based on pJK863)	HTL	Chromatin
638	745	TS260	barcode set	CAGL0E02761g	LDB7	YBL006C	GGTGTACCTCCAACTTACTA	GCGAGACCGCTTTACCAGAT	TS_4	D	12	3	TEF1P-NAT1-TEF1T (based on pJK863)	HTL	Chromatin
639	746	TS261	barcode set	CAGL0D06446g	STT4	YLR305C	CCGTTATACGAATATCGACC	GCGAGACCGCTTTACCAGAT	TS_4	D	8	1	TEF1P-NAT1-TEF1T (based on pJK863)	HTL	Signal transduction
640	747	TS261	barcode set	CAGL0D06446g	STT4	YLR305C	CCGTTATACGAATATCGACC	GCGAGACCGCTTTACCAGAT	TS_4	D	8	2	TEF1P-NAT1-TEF1T (based on pJK863)	HTL	Signal transduction
641	748	TS262	barcode set	CAGL0E03718g	SNF6	YHL025W	CGGATATGTACTAATTGGGC	GCGAGACCGCTTTACCAGAT	TS_4	B	10	1	TEF1P-NAT1-TEF1T (based on pJK863)	HTL	Chromatin
642	749	TS262	barcode set	CAGL0E03718g	SNF6	YHL025W	CGGATATGTACTAATTGGGC	GCGAGACCGCTTTACCAGAT	TS_4	B	10	2	TEF1P-NAT1-TEF1T (based on pJK863)	HTL	Chromatin
643	750	TS263	barcode set	CAGL0I07513g	PKH2	YOL100W	GGGTACATACGCATATTAGC	GCGAGACCGCTTTACCAGAT	TS_4	H	3	1	TEF1P-NAT1-TEF1T (based on pJK863)	HTL	Cell wall organization
644	751	TS263	barcode set	CAGL0I07513g	PKH2	YOL100W	GGGTACATACGCATATTAGC	GCGAGACCGCTTTACCAGAT	TS_4	H	3	2	TEF1P-NAT1-TEF1T (based on pJK863)	HTL	Cell wall organization
645	752	TS263	barcode set	CAGL0I07513g	PKH2	YOL100W	GGGTACATACGCATATTAGC	GCGAGACCGCTTTACCAGAT	TS_4	H	3	3	TEF1P-NAT1-TEF1T (based on pJK863)	HTL	Cell wall organization
646	753	TS264	barcode set	CAGL0K11231g	MNN10	YDR245W	GCATTAACGGGAACTAGAGC	GCGAGACCGCTTTACCAGAT	TS_5	B	6	1	TEF1P-NAT1-TEF1T (based on pJK863)	HTL	Cell wall organization
647	754	TS264	barcode set	CAGL0K11231g	MNN10	YDR245W	GCATTAACGGGAACTAGAGC	GCGAGACCGCTTTACCAGAT	TS_5	B	6	2	TEF1P-NAT1-TEF1T (based on pJK863)	HTL	Cell wall organization
648	755	TS264	barcode set	CAGL0K11231g	MNN10	YDR245W	GCATTAACGGGAACTAGAGC	GCGAGACCGCTTTACCAGAT	TS_5	B	6	3	TEF1P-NAT1-TEF1T (based on pJK863)	HTL	Cell wall organization
649	756	TS265	barcode set	CAGL0L03696g	ECM3	YOR092W	CGGCCTAACTGTAATTGATC	GCGAGACCGCTTTACCAGAT	TS_5	B	11	1	TEF1P-NAT1-TEF1T (based on pJK863)	HTL	Cell wall organization
650	757	TS265	barcode set	CAGL0L03696g	ECM3	YOR092W	CGGCCTAACTGTAATTGATC	GCGAGACCGCTTTACCAGAT	TS_5	B	11	2	TEF1P-NAT1-TEF1T (based on pJK863)	HTL	Cell wall organization
651	758	TS266	barcode set	CAGL0L07854g	CWH43	YCR017C	CGGACGGTATTCATTCATCT	GCGAGACCGCTTTACCAGAT	TS_5	C	3	1	TEF1P-NAT1-TEF1T (based on pJK863)	HTL	Cell wall organization
652	759	TS266	barcode set	CAGL0L07854g	CWH43	YCR017C	CGGACGGTATTCATTCATCT	GCGAGACCGCTTTACCAGAT	TS_5	C	3	2	TEF1P-NAT1-TEF1T (based on pJK863)	HTL	Cell wall organization
653	760	TS267	barcode set	CAGL0L08140g	BPH1	YCR032W	GTGAGCGAAACACCGCGTAA	GCGAGACCGCTTTACCAGAT	TS_5	C	4	1	TEF1P-NAT1-TEF1T (based on pJK863)	HTL	Cell wall organization
654	761	TS267	barcode set	CAGL0L08140g	BPH1	YCR032W	GTGAGCGAAACACCGCGTAA	GCGAGACCGCTTTACCAGAT	TS_5	C	4	2	TEF1P-NAT1-TEF1T (based on pJK863)	HTL	Cell wall organization
655	762	TS267	barcode set	CAGL0L08140g	BPH1	YCR032W	GTGAGCGAAACACCGCGTAA	GCGAGACCGCTTTACCAGAT	TS_5	C	4	3	TEF1P-NAT1-TEF1T (based on pJK863)	HTL	Cell wall organization
656	763	TS268	barcode set	CAGL0L11880g	RPH1	YER169W	GCCATTCGTATAACCGTGTC	GCGAGACCGCTTTACCAGAT	TS_5	C	9	1	TEF1P-NAT1-TEF1T (based on pJK863)	HTL	Transcriptional regulation
657	764	TS269	barcode set	CAGL0M01628g	SAC7	YDR389W	AAATTGGTCGTAATGCGTCG	GCGAGACCGCTTTACCAGAT	TS_5	D	1	1	TEF1P-NAT1-TEF1T (based on pJK863)	HTL	Other
658	765	TS270	barcode set	CAGL0M03157g	TAX4	YJL083W	ATTACCTAGTCGGAGACAGG	GCGAGACCGCTTTACCAGAT	TS_5	D	3	1	TEF1P-NAT1-TEF1T (based on pJK863)	HTL	Chromatin
659	766	TS270	barcode set	CAGL0M03157g	TAX4	YJL083W	ATTACCTAGTCGGAGACAGG	GCGAGACCGCTTTACCAGAT	TS_5	D	3	2	TEF1P-NAT1-TEF1T (based on pJK863)	HTL	Chromatin
660	767	TS271	barcode set	CAGL0M09449g	ECM21	YBL101C	CCGTTATACGAATATCGACC	GCGAGACCGCTTTACCAGAT	TS_5	D	8	1	TEF1P-NAT1-TEF1T (based on pJK863)	HTL	Cell wall organization
661	768	TS272	barcode set	CAGL0A01892g	DAT1	YML113W	TATAGTTCGGGCCATACGGT	GCGAGACCGCTTTACCAGAT	TS_5	E	2	1	TEF1P-NAT1-TEF1T (based on pJK863)	HTL	Other
662	769	TS273	barcode set	CAGL0C00781g	RDH54	YBR073W	GCGCTGCAATCAGAAAGGTA	GCGAGACCGCTTTACCAGAT	TS_5	E	12	1	TEF1P-NAT1-TEF1T (based on pJK863)	HTL	Other
663	770	TS274	barcode set	CAGL0C02915g	DAL80	YKR034W	ATTTCGGCACGCTCACGATG	GCGAGACCGCTTTACCAGAT	TS_5	F	7	1	TEF1P-NAT1-TEF1T (based on pJK863)	HTL	Other
664	771	TS274	barcode set	CAGL0C02915g	DAL80	YKR034W	ATTTCGGCACGCTCACGATG	GCGAGACCGCTTTACCAGAT	TS_5	F	7	2	TEF1P-NAT1-TEF1T (based on pJK863)	HTL	Other
665	772	TS274	barcode set	CAGL0C02915g	DAL80	YKR034W	ATTTCGGCACGCTCACGATG	GCGAGACCGCTTTACCAGAT	TS_5	F	7	3	TEF1P-NAT1-TEF1T (based on pJK863)	HTL	Other
666	773	TS275	barcode set	CAGL0C05401g	NMA1	YLR328W	TACTCGGCAACAGGTCGGTA	GCGAGACCGCTTTACCAGAT	TS_5	F	10	1	TEF1P-NAT1-TEF1T (based on pJK863)	HTL	Other
667	774	TS275	barcode set	CAGL0C05401g	NMA1	YLR328W	TACTCGGCAACAGGTCGGTA	GCGAGACCGCTTTACCAGAT	TS_5	F	10	2	TEF1P-NAT1-TEF1T (based on pJK863)	HTL	Other
668	775	TS275	barcode set	CAGL0C05401g	NMA1	YLR328W	TACTCGGCAACAGGTCGGTA	GCGAGACCGCTTTACCAGAT	TS_5	F	10	3	TEF1P-NAT1-TEF1T (based on pJK863)	HTL	Other
669	776	TS276	barcode set	CAGL0D00396g	PSF2	YJL072C	TATGGCACCACACGAAGGAC	GCGAGACCGCTTTACCAGAT	TS_5	F	11	1	TEF1P-NAT1-TEF1T (based on pJK863)	HTL	Other
670	777	TS276	barcode set	CAGL0D00396g	PSF2	YJL072C	TATGGCACCACACGAAGGAC	GCGAGACCGCTTTACCAGAT	TS_5	F	11	2	TEF1P-NAT1-TEF1T (based on pJK863)	HTL	Other
671	778	TS276	barcode set	CAGL0D00396g	PSF2	YJL072C	TATGGCACCACACGAAGGAC	GCGAGACCGCTTTACCAGAT	TS_5	F	11	3	TEF1P-NAT1-TEF1T (based on pJK863)	HTL	Other
672	779	TS277	barcode set	CAGL0D02750g	MYO2	YOR326W	GCCCACATGGATAACATTAC	GCGAGACCGCTTTACCAGAT	TS_5	G	1	1	TEF1P-NAT1-TEF1T (based on pJK863)	HTL	Other
673	780	TS277	barcode set	CAGL0D02750g	MYO2	YOR326W	GCCCACATGGATAACATTAC	GCGAGACCGCTTTACCAGAT	TS_5	G	1	2	TEF1P-NAT1-TEF1T (based on pJK863)	HTL	Other
674	781	TS277	barcode set	CAGL0D02750g	MYO2	YOR326W	GCCCACATGGATAACATTAC	GCGAGACCGCTTTACCAGAT	TS_5	G	1	3	TEF1P-NAT1-TEF1T (based on pJK863)	HTL	Other
675	782	TS278	barcode set	CAGL0D05104g	KAR3	YPR141C	TAGCCAGTAACAGTAGGCCC	GCGAGACCGCTTTACCAGAT	TS_5	G	3	1	TEF1P-NAT1-TEF1T (based on pJK863)	HTL	Other
676	783	TS278	barcode set	CAGL0D05104g	KAR3	YPR141C	TAGCCAGTAACAGTAGGCCC	GCGAGACCGCTTTACCAGAT	TS_5	G	3	2	TEF1P-NAT1-TEF1T (based on pJK863)	HTL	Other
677	784	TS278	barcode set	CAGL0D05104g	KAR3	YPR141C	TAGCCAGTAACAGTAGGCCC	GCGAGACCGCTTTACCAGAT	TS_5	G	3	3	TEF1P-NAT1-TEF1T (based on pJK863)	HTL	Other
678	785	TS279	barcode set	CAGL0D05654g	SDS23	YGL056C	TAAGAATCGTTAGCAAGGCC	GCGAGACCGCTTTACCAGAT	TS_5	G	5	1	TEF1P-NAT1-TEF1T (based on pJK863)	HTL	Other
679	786	TS279	barcode set	CAGL0D05654g	SDS23	YGL056C	TAAGAATCGTTAGCAAGGCC	GCGAGACCGCTTTACCAGAT	TS_5	G	5	2	TEF1P-NAT1-TEF1T (based on pJK863)	HTL	Other
680	787	TS279	barcode set	CAGL0D05654g	SDS23	YGL056C	TAAGAATCGTTAGCAAGGCC	GCGAGACCGCTTTACCAGAT	TS_5	G	5	3	TEF1P-NAT1-TEF1T (based on pJK863)	HTL	Other
681	788	TS280	barcode set	CAGL0D06534g	SRB4	YER022W	CATAAGCGTTGTGAATCGCG	GCGAGACCGCTTTACCAGAT	TS_5	G	7	1	TEF1P-NAT1-TEF1T (based on pJK863)	HTL	Other
682	789	TS280	barcode set	CAGL0D06534g	SRB4	YER022W	CATAAGCGTTGTGAATCGCG	GCGAGACCGCTTTACCAGAT	TS_5	G	7	2	TEF1P-NAT1-TEF1T (based on pJK863)	HTL	Other
683	790	TS280	barcode set	CAGL0D06534g	SRB4	YER022W	CATAAGCGTTGTGAATCGCG	GCGAGACCGCTTTACCAGAT	TS_5	G	7	3	TEF1P-NAT1-TEF1T (based on pJK863)	HTL	Other
684	791	TS281	barcode set	CAGL0D06666g	TPK2	YPL203W	TGCGCGGTCAAACCAAGCAA	GCGAGACCGCTTTACCAGAT	TS_5	G	8	1	TEF1P-NAT1-TEF1T (based on pJK863)	HTL	Other
685	792	TS281	barcode set	CAGL0D06666g	TPK2	YPL203W	TGCGCGGTCAAACCAAGCAA	GCGAGACCGCTTTACCAGAT	TS_5	G	8	2	TEF1P-NAT1-TEF1T (based on pJK863)	HTL	Other
686	793	TS281	barcode set	CAGL0D06666g	TPK2	YPL203W	TGCGCGGTCAAACCAAGCAA	GCGAGACCGCTTTACCAGAT	TS_5	G	8	3	TEF1P-NAT1-TEF1T (based on pJK863)	HTL	Other
687	794	TS282	barcode set	CAGL0E00165g	CYC2	YOR037W	TCCATACCGATAAAGCTCGA	GCGAGACCGCTTTACCAGAT	TS_5	G	10	1	TEF1P-NAT1-TEF1T (based on pJK863)	HTL	Other
688	795	TS283	barcode set	CAGL0E01375g	MUK1	YPL070W	TACTGACGCGGGACTGACTT	GCGAGACCGCTTTACCAGAT	TS_5	G	11	1	TEF1P-NAT1-TEF1T (based on pJK863)	HTL	Other
689	796	TS283	barcode set	CAGL0E01375g	MUK1	YPL070W	TACTGACGCGGGACTGACTT	GCGAGACCGCTTTACCAGAT	TS_5	G	11	2	TEF1P-NAT1-TEF1T (based on pJK863)	HTL	Other
690	797	TS283	barcode set	CAGL0E01375g	MUK1	YPL070W	TACTGACGCGGGACTGACTT	GCGAGACCGCTTTACCAGAT	TS_5	G	11	3	TEF1P-NAT1-TEF1T (based on pJK863)	HTL	Other
691	798	TS284	barcode set	CAGL0E02211g	CBS2	YDR197W	TAACTGCCGCGAGTCGTCTT	GCGAGACCGCTTTACCAGAT	TS_5	G	12	1	TEF1P-NAT1-TEF1T (based on pJK863)	HTL	Other
692	799	TS284	barcode set	CAGL0E02211g	CBS2	YDR197W	TAACTGCCGCGAGTCGTCTT	GCGAGACCGCTTTACCAGAT	TS_5	G	12	2	TEF1P-NAT1-TEF1T (based on pJK863)	HTL	Other
693	800	TS284	barcode set	CAGL0E02211g	CBS2	YDR197W	TAACTGCCGCGAGTCGTCTT	GCGAGACCGCTTTACCAGAT	TS_5	G	12	3	TEF1P-NAT1-TEF1T (based on pJK863)	HTL	Other
694	801	TS285	barcode set	CAGL0E03069g	HXT8	YJL214W	TATCCTGTCGGAGCGCGTTT	GCGAGACCGCTTTACCAGAT	TS_5	H	1	1	TEF1P-NAT1-TEF1T (based on pJK863)	HTL	Transcriptional regulation
695	802	TS285	barcode set	CAGL0E03069g	HXT8	YJL214W	TATCCTGTCGGAGCGCGTTT	GCGAGACCGCTTTACCAGAT	TS_5	H	1	2	TEF1P-NAT1-TEF1T (based on pJK863)	HTL	Transcriptional regulation
696	803	TS285	barcode set	CAGL0E03069g	HXT8	YJL214W	TATCCTGTCGGAGCGCGTTT	GCGAGACCGCTTTACCAGAT	TS_5	H	1	3	TEF1P-NAT1-TEF1T (based on pJK863)	HTL	Transcriptional regulation
697	804	TS286	barcode set	CAGL0E03135g	MDL2	YPL270W	ACGGACACGACAGTAGTTCC	GCGAGACCGCTTTACCAGAT	TS_5	H	2	1	TEF1P-NAT1-TEF1T (based on pJK863)	HTL	Other
698	805	TS286	barcode set	CAGL0E03135g	MDL2	YPL270W	ACGGACACGACAGTAGTTCC	GCGAGACCGCTTTACCAGAT	TS_5	H	2	2	TEF1P-NAT1-TEF1T (based on pJK863)	HTL	Other
699	806	TS286	barcode set	CAGL0E03135g	MDL2	YPL270W	ACGGACACGACAGTAGTTCC	GCGAGACCGCTTTACCAGAT	TS_5	H	2	3	TEF1P-NAT1-TEF1T (based on pJK863)	HTL	Other
700	807	TS287	barcode set	CAGL0E03498g	SMF1	YOL122C	GGGTACATACGCATATTAGC	GCGAGACCGCTTTACCAGAT	TS_5	H	3	1	TEF1P-NAT1-TEF1T (based on pJK863)	HTL	Other
701	808	TS287	barcode set	CAGL0E03498g	SMF1	YOL122C	GGGTACATACGCATATTAGC	GCGAGACCGCTTTACCAGAT	TS_5	H	3	2	TEF1P-NAT1-TEF1T (based on pJK863)	HTL	Other
702	809	TS287	barcode set	CAGL0E03498g	SMF1	YOL122C	GGGTACATACGCATATTAGC	GCGAGACCGCTTTACCAGAT	TS_5	H	3	3	TEF1P-NAT1-TEF1T (based on pJK863)	HTL	Other
703	810	TS288	barcode set	CAGL0E04202g	RFX1	YLR176C	AAGCCAAACGAACTTGCGGC	GCGAGACCGCTTTACCAGAT	TS_5	H	4	1	TEF1P-NAT1-TEF1T (based on pJK863)	HTL	Other
704	811	TS288	barcode set	CAGL0E04202g	RFX1	YLR176C	AAGCCAAACGAACTTGCGGC	GCGAGACCGCTTTACCAGAT	TS_5	H	4	2	TEF1P-NAT1-TEF1T (based on pJK863)	HTL	Other
705	812	TS288	barcode set	CAGL0E04202g	RFX1	YLR176C	AAGCCAAACGAACTTGCGGC	GCGAGACCGCTTTACCAGAT	TS_5	H	4	3	TEF1P-NAT1-TEF1T (based on pJK863)	HTL	Other
706	813	TS289	barcode set	CAGL0E06094g	FZF1	YGL254W	ATTGAGCCTGACCACATGCG	GCGAGACCGCTTTACCAGAT	TS_5	H	7	1	TEF1P-NAT1-TEF1T (based on pJK863)	HTL	Other
707	814	TS289	barcode set	CAGL0E06094g	FZF1	YGL254W	ATTGAGCCTGACCACATGCG	GCGAGACCGCTTTACCAGAT	TS_5	H	7	2	TEF1P-NAT1-TEF1T (based on pJK863)	HTL	Other
708	815	TS289	barcode set	CAGL0E06094g	FZF1	YGL254W	ATTGAGCCTGACCACATGCG	GCGAGACCGCTTTACCAGAT	TS_5	H	7	3	TEF1P-NAT1-TEF1T (based on pJK863)	HTL	Other
709	816	TS290	barcode set	CAGL0E06578g	MRP13	YGR084C	CCTAGAGACGTAGATATGCG	GCGAGACCGCTTTACCAGAT	TS_5	H	8	1	TEF1P-NAT1-TEF1T (based on pJK863)	HTL	Other
710	817	TS290	barcode set	CAGL0E06578g	MRP13	YGR084C	CCTAGAGACGTAGATATGCG	GCGAGACCGCTTTACCAGAT	TS_5	H	8	2	TEF1P-NAT1-TEF1T (based on pJK863)	HTL	Other
711	818	TS290	barcode set	CAGL0E06578g	MRP13	YGR084C	CCTAGAGACGTAGATATGCG	GCGAGACCGCTTTACCAGAT	TS_5	H	8	3	TEF1P-NAT1-TEF1T (based on pJK863)	HTL	Other
712	819	TS291	barcode set	CAGL0E06622g		YFR042W	ACACCGTATTTAAGACTGCG	GCGAGACCGCTTTACCAGAT	TS_5	H	9	1	TEF1P-NAT1-TEF1T (based on pJK863)	HTL	Other
713	820	TS291	barcode set	CAGL0E06622g		YFR042W	ACACCGTATTTAAGACTGCG	GCGAGACCGCTTTACCAGAT	TS_5	H	9	2	TEF1P-NAT1-TEF1T (based on pJK863)	HTL	Other
714	821	TS291	barcode set	CAGL0E06622g		YFR042W	ACACCGTATTTAAGACTGCG	GCGAGACCGCTTTACCAGAT	TS_5	H	9	3	TEF1P-NAT1-TEF1T (based on pJK863)	HTL	Other
715	822	TS292	barcode set	CAGL0F00341g		YKL105C	ATCTCGCGTGACGATAGGCT	GCGAGACCGCTTTACCAGAT	TS_5	H	10	1	TEF1P-NAT1-TEF1T (based on pJK863)	HTL	Transcriptional regulation
716	823	TS292	barcode set	CAGL0F00341g		YKL105C	ATCTCGCGTGACGATAGGCT	GCGAGACCGCTTTACCAGAT	TS_5	H	10	2	TEF1P-NAT1-TEF1T (based on pJK863)	HTL	Transcriptional regulation
717	824	TS292	barcode set	CAGL0F00341g		YKL105C	ATCTCGCGTGACGATAGGCT	GCGAGACCGCTTTACCAGAT	TS_5	H	10	3	TEF1P-NAT1-TEF1T (based on pJK863)	HTL	Transcriptional regulation
718	825	TS293	barcode set	CAGL0F00781g	PEX2	YJL210W	GATGCGGCACTATCGCTCAT	GCGAGACCGCTTTACCAGAT	TS_5	H	11	1	TEF1P-NAT1-TEF1T (based on pJK863)	HTL	Other
719	826	TS293	barcode set	CAGL0F00781g	PEX2	YJL210W	GATGCGGCACTATCGCTCAT	GCGAGACCGCTTTACCAGAT	TS_5	H	11	2	TEF1P-NAT1-TEF1T (based on pJK863)	HTL	Other
720	827	TS293	barcode set	CAGL0F00781g	PEX2	YJL210W	GATGCGGCACTATCGCTCAT	GCGAGACCGCTTTACCAGAT	TS_5	H	11	3	TEF1P-NAT1-TEF1T (based on pJK863)	HTL	Other
721	828	TS294	barcode set	CAGL0F01441g	NIF3	YGL221C	AGGAGCTTGTCTAATATCGG	GCGAGACCGCTTTACCAGAT	TS_5	H	12	1	TEF1P-NAT1-TEF1T (based on pJK863)	HTL	Other
722	829	TS294	barcode set	CAGL0F01441g	NIF3	YGL221C	AGGAGCTTGTCTAATATCGG	GCGAGACCGCTTTACCAGAT	TS_5	H	12	2	TEF1P-NAT1-TEF1T (based on pJK863)	HTL	Other
723	830	TS294	barcode set	CAGL0F01441g	NIF3	YGL221C	AGGAGCTTGTCTAATATCGG	GCGAGACCGCTTTACCAGAT	TS_5	H	12	3	TEF1P-NAT1-TEF1T (based on pJK863)	HTL	Other
724	831	TS295	barcode set	CAGL0M05841g	KTR2	YKR061W	ACCGACGGCTTAGCGATCTT	GCGAGACCGCTTTACCAGAT	TS_5	D	5	1	TEF1P-NAT1-TEF1T (based on pJK863)	HTL	Cell wall organization
725	832	TS295	barcode set	CAGL0M05841g	KTR2	YKR061W	ACCGACGGCTTAGCGATCTT	GCGAGACCGCTTTACCAGAT	TS_5	D	5	2	TEF1P-NAT1-TEF1T (based on pJK863)	HTL	Cell wall organization
726	833	TS295	barcode set	CAGL0M05841g	KTR2	YKR061W	ACCGACGGCTTAGCGATCTT	GCGAGACCGCTTTACCAGAT	TS_5	D	5	3	TEF1P-NAT1-TEF1T (based on pJK863)	HTL	Cell wall organization
727	834	TS296	barcode set	CAGL0M08492g	PIR1	YKL164C	CCGACCGTATAAGTTCTATC	GCGAGACCGCTTTACCAGAT	TS_5	D	7	1	TEF1P-NAT1-TEF1T (based on pJK863)	HTL	Cell wall organization
728	835	TS296	barcode set	CAGL0M08492g	PIR1	YKL164C	CCGACCGTATAAGTTCTATC	GCGAGACCGCTTTACCAGAT	TS_5	D	7	2	TEF1P-NAT1-TEF1T (based on pJK863)	HTL	Cell wall organization
729	836	TS296	barcode set	CAGL0M08492g	PIR1	YKL164C	CCGACCGTATAAGTTCTATC	GCGAGACCGCTTTACCAGAT	TS_5	D	7	3	TEF1P-NAT1-TEF1T (based on pJK863)	HTL	Cell wall organization
730	837	TS297	barcode set	CAGL0D04840g	PSP1	YDR505C	AGACTAAGACCATTGTACCC	GCGAGACCGCTTTACCAGAT	TS_5	G	2	1	TEF1P-NAT1-TEF1T (based on pJK863)	HTL	Other
731	838	TS297	barcode set	CAGL0D04840g	PSP1	YDR505C	AGACTAAGACCATTGTACCC	GCGAGACCGCTTTACCAGAT	TS_5	G	2	2	TEF1P-NAT1-TEF1T (based on pJK863)	HTL	Other
732	839	TS297	barcode set	CAGL0D04840g	PSP1	YDR505C	AGACTAAGACCATTGTACCC	GCGAGACCGCTTTACCAGAT	TS_5	G	2	3	TEF1P-NAT1-TEF1T (based on pJK863)	HTL	Other
733	840	TS298	barcode set	CAGL0C00869g		YKL161C	ATATAGCGTGACAGAGTACG	GCGAGACCGCTTTACCAGAT	TS_5	F	2	1	TEF1P-NAT1-TEF1T (based on pJK863)	HTL	Other
734	841	TS299	barcode set	CAGL0C03311g	COG1	YGL223C	GAGCTTGACTCACCGTCTTG	GCGAGACCGCTTTACCAGAT	TS_5	F	8	1	TEF1P-NAT1-TEF1T (based on pJK863)	HTL	Other
735	842	TS299	barcode set	CAGL0C03311g	COG1	YGL223C	GAGCTTGACTCACCGTCTTG	GCGAGACCGCTTTACCAGAT	TS_5	F	8	2	TEF1P-NAT1-TEF1T (based on pJK863)	HTL	Other
736	843	TS299	barcode set	CAGL0C03311g	COG1	YGL223C	GAGCTTGACTCACCGTCTTG	GCGAGACCGCTTTACCAGAT	TS_5	F	8	3	TEF1P-NAT1-TEF1T (based on pJK863)	HTL	Other
737	844	TS300	barcode set	CAGL0B00572g	DSF2	YBR007C	AATCGGTACTAAGTCGGTTC	GCGAGACCGCTTTACCAGAT	TS_5	E	9	1	TEF1P-NAT1-TEF1T (based on pJK863)	HTL	Other
738	845	TS300	barcode set	CAGL0B00572g	DSF2	YBR007C	AATCGGTACTAAGTCGGTTC	GCGAGACCGCTTTACCAGAT	TS_5	E	9	2	TEF1P-NAT1-TEF1T (based on pJK863)	HTL	Other
739	846	TS301	barcode set	CAGL0M00748g	ECM7	YLR443W	GTATTCCGACTGCGGCACTT	GCGAGACCGCTTTACCAGAT	TS_5	C	11	1	TEF1P-NAT1-TEF1T (based on pJK863)	HTL	Transport
740	847	TS301	barcode set	CAGL0M00748g	ECM7	YLR443W	GTATTCCGACTGCGGCACTT	GCGAGACCGCTTTACCAGAT	TS_5	C	11	2	TEF1P-NAT1-TEF1T (based on pJK863)	HTL	Transport
741	848	TS302	barcode set	CAGL0A00143g	MPC54	YOR177C	GGCTAACCGAAACCGTGACA	GCGAGACCGCTTTACCAGAT	TS_5	D	11	1	TEF1P-NAT1-TEF1T (based on pJK863)	HTL	Other
742	849	TS302	barcode set	CAGL0A00143g	MPC54	YOR177C	GGCTAACCGAAACCGTGACA	GCGAGACCGCTTTACCAGAT	TS_5	D	11	2	TEF1P-NAT1-TEF1T (based on pJK863)	HTL	Other
743	850	TS302	barcode set	CAGL0A00143g	MPC54	YOR177C	GGCTAACCGAAACCGTGACA	GCGAGACCGCTTTACCAGAT	TS_5	D	11	3	TEF1P-NAT1-TEF1T (based on pJK863)	HTL	Other
744	851	TS303	barcode set	CAGL0A02299g	CTF4	YPR135W	TAAGGCGTCGTCACTACGGT	GCGAGACCGCTTTACCAGAT	TS_5	E	3	1	TEF1P-NAT1-TEF1T (based on pJK863)	HTL	Other
745	852	TS303	barcode set	CAGL0A02299g	CTF4	YPR135W	TAAGGCGTCGTCACTACGGT	GCGAGACCGCTTTACCAGAT	TS_5	E	3	2	TEF1P-NAT1-TEF1T (based on pJK863)	HTL	Other
746	853	TS303	barcode set	CAGL0A02299g	CTF4	YPR135W	TAAGGCGTCGTCACTACGGT	GCGAGACCGCTTTACCAGAT	TS_5	E	3	3	TEF1P-NAT1-TEF1T (based on pJK863)	HTL	Other
747	854	TS304	barcode set	CAGL0A03410g	MLH1	YMR167W	TATTAGTGCGGACCCGGCTT	GCGAGACCGCTTTACCAGAT	TS_5	E	5	1	TEF1P-NAT1-TEF1T (based on pJK863)	HTL	Other
748	855	TS304	barcode set	CAGL0A03410g	MLH1	YMR167W	TATTAGTGCGGACCCGGCTT	GCGAGACCGCTTTACCAGAT	TS_5	E	5	2	TEF1P-NAT1-TEF1T (based on pJK863)	HTL	Other
749	856	TS305	barcode set	CAGL0A04609g	LST4	YKL176C	TTCTACCGTCGGAGGCAGTT	GCGAGACCGCTTTACCAGAT	TS_5	E	6	1	TEF1P-NAT1-TEF1T (based on pJK863)	HTL	Other
750	857	TS305	barcode set	CAGL0A04609g	LST4	YKL176C	TTCTACCGTCGGAGGCAGTT	GCGAGACCGCTTTACCAGAT	TS_5	E	6	2	TEF1P-NAT1-TEF1T (based on pJK863)	HTL	Other
751	858	TS305	barcode set	CAGL0A04609g	LST4	YKL176C	TTCTACCGTCGGAGGCAGTT	GCGAGACCGCTTTACCAGAT	TS_5	E	6	3	TEF1P-NAT1-TEF1T (based on pJK863)	HTL	Other
752	859	TS306	barcode set	CAGL0A04763g	FRE7	YOL152W	TTTAGTGTCCGCGCCACGTT	GCGAGACCGCTTTACCAGAT	TS_5	E	7	1	TEF1P-NAT1-TEF1T (based on pJK863)	HTL	Other
753	860	TS306	barcode set	CAGL0A04763g	FRE7	YOL152W	TTTAGTGTCCGCGCCACGTT	GCGAGACCGCTTTACCAGAT	TS_5	E	7	2	TEF1P-NAT1-TEF1T (based on pJK863)	HTL	Other
754	861	TS306	barcode set	CAGL0A04763g	FRE7	YOL152W	TTTAGTGTCCGCGCCACGTT	GCGAGACCGCTTTACCAGAT	TS_5	E	7	3	TEF1P-NAT1-TEF1T (based on pJK863)	HTL	Other
755	862	TS307	barcode set	CAGL0B03223g		YOR287C	GGACCGACTATTCCCTAAAT	GCGAGACCGCTTTACCAGAT	TS_5	E	11	1	TEF1P-NAT1-TEF1T (based on pJK863)	HTL	Other
756	863	TS307	barcode set	CAGL0B03223g		YOR287C	GGACCGACTATTCCCTAAAT	GCGAGACCGCTTTACCAGAT	TS_5	E	11	2	TEF1P-NAT1-TEF1T (based on pJK863)	HTL	Other
757	864	TS307	barcode set	CAGL0B03223g		YOR287C	GGACCGACTATTCCCTAAAT	GCGAGACCGCTTTACCAGAT	TS_5	E	11	3	TEF1P-NAT1-TEF1T (based on pJK863)	HTL	Other
758	865	TS308	barcode set	CAGL0C00803g	MET31	YPL038W	AGCATGTCTCTAACTGGACG	GCGAGACCGCTTTACCAGAT	TS_5	F	1	1	TEF1P-NAT1-TEF1T (based on pJK863)	HTL	Other
759	866	TS308	barcode set	CAGL0C00803g	MET31	YPL038W	AGCATGTCTCTAACTGGACG	GCGAGACCGCTTTACCAGAT	TS_5	F	1	2	TEF1P-NAT1-TEF1T (based on pJK863)	HTL	Other
760	867	TS308	barcode set	CAGL0C00803g	MET31	YPL038W	AGCATGTCTCTAACTGGACG	GCGAGACCGCTTTACCAGAT	TS_5	F	1	3	TEF1P-NAT1-TEF1T (based on pJK863)	HTL	Other
761	868	TS309	barcode set	CAGL0C01111g	PPZ1	YML016C	ATATACGTGGAATGACTGGC	GCGAGACCGCTTTACCAGAT	TS_5	F	3	1	TEF1P-NAT1-TEF1T (based on pJK863)	HTL	Other
762	869	TS310	barcode set	CAGL0C02365g	MET4	YNL103W	TGGATTCGACTCGCTCGCAT	GCGAGACCGCTTTACCAGAT	TS_5	F	6	1	TEF1P-NAT1-TEF1T (based on pJK863)	HTL	Other
763	870	TS310	barcode set	CAGL0C02365g	MET4	YNL103W	TGGATTCGACTCGCTCGCAT	GCGAGACCGCTTTACCAGAT	TS_5	F	6	2	TEF1P-NAT1-TEF1T (based on pJK863)	HTL	Other
764	871	TS310	barcode set	CAGL0C02365g	MET4	YNL103W	TGGATTCGACTCGCTCGCAT	GCGAGACCGCTTTACCAGAT	TS_5	F	6	3	TEF1P-NAT1-TEF1T (based on pJK863)	HTL	Other
765	872	TS311	barcode set	CAGL0J09416g	SNA4	YDL123W	AATGTCGCGTAATGGCTTAG	GCGAGACCGCTTTACCAGAT	TS_5	A	7	1	TEF1P-NAT1-TEF1T (based on pJK863)	HTL	Vacuole, Golgi
766	873	TS311	barcode set	CAGL0J09416g	SNA4	YDL123W	AATGTCGCGTAATGGCTTAG	GCGAGACCGCTTTACCAGAT	TS_5	A	7	2	TEF1P-NAT1-TEF1T (based on pJK863)	HTL	Vacuole, Golgi
767	874	TS311	barcode set	CAGL0J09416g	SNA4	YDL123W	AATGTCGCGTAATGGCTTAG	GCGAGACCGCTTTACCAGAT	TS_5	A	7	3	TEF1P-NAT1-TEF1T (based on pJK863)	HTL	Vacuole, Golgi
768	875	TS312	barcode set	CAGL0K02277g	DSE1	YER124C	AGGCAGATACGATTAGTACG	GCGAGACCGCTTTACCAGAT	TS_5	A	8	1	TEF1P-NAT1-TEF1T (based on pJK863)	HTL	Cell wall organization
769	876	TS313	barcode set	CAGL0K04455g	SPR3	YGR059W	CCCTGTTATGAACCTTGATC	GCGAGACCGCTTTACCAGAT	TS_5	A	10	1	TEF1P-NAT1-TEF1T (based on pJK863)	HTL	Cell wall organization
770	877	TS313	barcode set	CAGL0K04455g	SPR3	YGR059W	CCCTGTTATGAACCTTGATC	GCGAGACCGCTTTACCAGAT	TS_5	A	10	2	TEF1P-NAT1-TEF1T (based on pJK863)	HTL	Cell wall organization
771	878	TS313	barcode set	CAGL0K04455g	SPR3	YGR059W	CCCTGTTATGAACCTTGATC	GCGAGACCGCTTTACCAGAT	TS_5	A	10	3	TEF1P-NAT1-TEF1T (based on pJK863)	HTL	Cell wall organization
772	879	TS314	barcode set	CAGL0K06127g	ECM11	YDR446W	ATAGCCTTCTAAGAGCGGCG	GCGAGACCGCTTTACCAGAT	TS_5	A	12	1	TEF1P-NAT1-TEF1T (based on pJK863)	HTL	Cell wall organization
773	880	TS314	barcode set	CAGL0K06127g	ECM11	YDR446W	ATAGCCTTCTAAGAGCGGCG	GCGAGACCGCTTTACCAGAT	TS_5	A	12	2	TEF1P-NAT1-TEF1T (based on pJK863)	HTL	Cell wall organization
774	881	TS315	barcode set	CAGL0J05236g	LAS21	YJL062W	CGATTCGATAAATGACGCGA	GCGAGACCGCTTTACCAGAT	TS_5	A	2	1	TEF1P-NAT1-TEF1T (based on pJK863)	HTL	Cell wall organization
775	882	TS272	barcode set	CAGL0A01892g	DAT1	YML113W	TATAGTTCGGGCCATACGGT	GCGAGACCGCTTTACCAGAT	TS_5	E	2	2	TEF1P-NAT1-TEF1T (based on pJK863)	HTL	Other
776	883	TS272	barcode set	CAGL0A01892g	DAT1	YML113W	TATAGTTCGGGCCATACGGT	GCGAGACCGCTTTACCAGAT	TS_5	E	2	3	TEF1P-NAT1-TEF1T (based on pJK863)	HTL	Other
777	884	TS300	barcode set	CAGL0B00572g	DSF2	YBR007C	AATCGGTACTAAGTCGGTTC	GCGAGACCGCTTTACCAGAT	TS_5	E	9	3	TEF1P-NAT1-TEF1T (based on pJK863)	HTL	Other
778	885	TS300	barcode set	CAGL0B00572g	DSF2	YBR007C	AATCGGTACTAAGTCGGTTC	GCGAGACCGCTTTACCAGAT	TS_5	E	9	4	TEF1P-NAT1-TEF1T (based on pJK863)	HTL	Other
779	886	TS307	barcode set	CAGL0B03223g		YOR287C	GGACCGACTATTCCCTAAAT	GCGAGACCGCTTTACCAGAT	TS_5	E	11	4	TEF1P-NAT1-TEF1T (based on pJK863)	HTL	Other
780	887	TS316	barcode set	CAGL0J06072g	CBK1	YNL161W	ATCGAACGTGTGTCAAACGC	GCGAGACCGCTTTACCAGAT	TS_5	A	4	1	TEF1P-NAT1-TEF1T (based on pJK863)	HTL	Cell wall organization
781	888	TS316	barcode set	CAGL0J06072g	CBK1	YNL161W	ATCGAACGTGTGTCAAACGC	GCGAGACCGCTTTACCAGAT	TS_5	A	4	2	TEF1P-NAT1-TEF1T (based on pJK863)	HTL	Cell wall organization
782	889	TS317	barcode set	CAGL0K06963g	ROT2	YBR229C	GTGAGCGAAACACCGCGTAA	GCGAGACCGCTTTACCAGAT	TS_5	B	2	1	TEF1P-NAT1-TEF1T (based on pJK863)	HTL	Cell wall organization
783	890	TS318	barcode set	CAGL0L03608g	FMP50	YKR027W	CGGATATGTACTAATTGGGC	GCGAGACCGCTTTACCAGAT	TS_5	B	10	1	TEF1P-NAT1-TEF1T (based on pJK863)	HTL	Vacuole, Golgi
784	891	TS319	barcode set	CAGL0J07656g	SLA2	YNL243W	AAGATAGTCGCCGAACTCGC	GCGAGACCGCTTTACCAGAT	TS_5	A	5	1	TEF1P-NAT1-TEF1T (based on pJK863)	HTL	Other
785	892	TS319	barcode set	CAGL0J07656g	SLA2	YNL243W	AAGATAGTCGCCGAACTCGC	GCGAGACCGCTTTACCAGAT	TS_5	A	5	2	TEF1P-NAT1-TEF1T (based on pJK863)	HTL	Other
786	893	TS319	barcode set	CAGL0J07656g	SLA2	YNL243W	AAGATAGTCGCCGAACTCGC	GCGAGACCGCTTTACCAGAT	TS_5	A	5	3	TEF1P-NAT1-TEF1T (based on pJK863)	HTL	Other
787	894	TS320	barcode set	CAGL0K06963g	ROT2	YBR229C	GTGAGCGAAACACCGCGTAA	GCGAGACCGCTTTACCAGAT	TS_5	B	2	1	TEF1P-NAT1-TEF1T (based on pJK863)	HTL	Cell wall organization
788	895	TS320	barcode set	CAGL0K06963g	ROT2	YBR229C	GTGAGCGAAACACCGCGTAA	GCGAGACCGCTTTACCAGAT	TS_5	B	2	2	TEF1P-NAT1-TEF1T (based on pJK863)	HTL	Cell wall organization
789	896	TS320	barcode set	CAGL0K06963g	ROT2	YBR229C	GTGAGCGAAACACCGCGTAA	GCGAGACCGCTTTACCAGAT	TS_5	B	2	3	TEF1P-NAT1-TEF1T (based on pJK863)	HTL	Cell wall organization
790	897	TS321	barcode set	CAGL0K08228g		YKR051W	GTGCGAACCAACGTACTACA	GCGAGACCGCTTTACCAGAT	TS_5	B	3	1	TEF1P-NAT1-TEF1T (based on pJK863)	HTL	Other
791	898	TS321	barcode set	CAGL0K08228g		YKR051W	GTGCGAACCAACGTACTACA	GCGAGACCGCTTTACCAGAT	TS_5	B	3	2	TEF1P-NAT1-TEF1T (based on pJK863)	HTL	Other
792	899	TS321	barcode set	CAGL0K08228g		YKR051W	GTGCGAACCAACGTACTACA	GCGAGACCGCTTTACCAGAT	TS_5	B	3	3	TEF1P-NAT1-TEF1T (based on pJK863)	HTL	Other
793	902	TS323	barcode set	CAGL0J05236g	LAS21	YJL062W	CGATTCGATAAATGACGCGA	GCGAGACCGCTTTACCAGAT	TS_5	A	2	1	TEF1P-NAT1-TEF1T (based on pJK863)	HTL	Cell wall organization
794	903	TS323	barcode set	CAGL0J05236g	LAS21	YJL062W	CGATTCGATAAATGACGCGA	GCGAGACCGCTTTACCAGAT	TS_5	A	2	2	TEF1P-NAT1-TEF1T (based on pJK863)	HTL	Cell wall organization
795	904	TS323	barcode set	CAGL0J05236g	LAS21	YJL062W	CGATTCGATAAATGACGCGA	GCGAGACCGCTTTACCAGAT	TS_5	A	2	3	TEF1P-NAT1-TEF1T (based on pJK863)	HTL	Cell wall organization
796	905	TS324	barcode set	CAGL0J08910g	CRR1	YLR213C	ATCGAGCACGTAACCGTTGC	GCGAGACCGCTTTACCAGAT	TS_5	A	6	1	TEF1P-NAT1-TEF1T (based on pJK863)	HTL	Cell wall organization
797	906	TS324	barcode set	CAGL0J08910g	CRR1	YLR213C	ATCGAGCACGTAACCGTTGC	GCGAGACCGCTTTACCAGAT	TS_5	A	6	2	TEF1P-NAT1-TEF1T (based on pJK863)	HTL	Cell wall organization
798	907	TS324	barcode set	CAGL0J08910g	CRR1	YLR213C	ATCGAGCACGTAACCGTTGC	GCGAGACCGCTTTACCAGAT	TS_5	A	6	3	TEF1P-NAT1-TEF1T (based on pJK863)	HTL	Cell wall organization
799	908	TS325	barcode set	CAGL0K02277g	DSE1	YER124C	AGGCAGATACGATTAGTACG	GCGAGACCGCTTTACCAGAT	TS_5	A	8	1	TEF1P-NAT1-TEF1T (based on pJK863)	HTL	Cell wall organization
800	909	TS325	barcode set	CAGL0K02277g	DSE1	YER124C	AGGCAGATACGATTAGTACG	GCGAGACCGCTTTACCAGAT	TS_5	A	8	2	TEF1P-NAT1-TEF1T (based on pJK863)	HTL	Cell wall organization
801	910	TS325	barcode set	CAGL0K02277g	DSE1	YER124C	AGGCAGATACGATTAGTACG	GCGAGACCGCTTTACCAGAT	TS_5	A	8	3	TEF1P-NAT1-TEF1T (based on pJK863)	HTL	Cell wall organization
802	911	TS326	barcode set	CAGL0L11528g	BIG1	YHR101C	GGGTACTCCACAACATTACA	GCGAGACCGCTTTACCAGAT	TS_5	C	6	1	TEF1P-NAT1-TEF1T (based on pJK863)	HTL	Cell wall organization
803	912	TS326	barcode set	CAGL0L11528g	BIG1	YHR101C	GGGTACTCCACAACATTACA	GCGAGACCGCTTTACCAGAT	TS_5	C	6	2	TEF1P-NAT1-TEF1T (based on pJK863)	HTL	Cell wall organization
804	913	TS327	barcode set	CAGL0L11572g	SBE22	YHR103W	GCATTAACGGGAACTAGAGC	GCGAGACCGCTTTACCAGAT	TS_5	C	8	1	TEF1P-NAT1-TEF1T (based on pJK863)	HTL	Cell wall organization
805	914	TS328	barcode set	CAGL0M05489g	KTR3	YBR205W	ATTAGCGTCTCGACTACCTT	GCGAGACCGCTTTACCAGAT	TS_5	D	4	1	TEF1P-NAT1-TEF1T (based on pJK863)	HTL	Cell wall organization
806	915	TS329	barcode set	CAGL0M13805g	SCW4	YGR279C	CCGGCTAGTTAATTTGACTC	GCGAGACCGCTTTACCAGAT	TS_5	D	10	1	TEF1P-NAT1-TEF1T (based on pJK863)	HTL	Other
807	916	TS329	barcode set	CAGL0M13805g	SCW4	YGR279C	CCGGCTAGTTAATTTGACTC	GCGAGACCGCTTTACCAGAT	TS_5	D	10	2	TEF1P-NAT1-TEF1T (based on pJK863)	HTL	Other
808	917	TS329	barcode set	CAGL0M13805g	SCW4	YGR279C	CCGGCTAGTTAATTTGACTC	GCGAGACCGCTTTACCAGAT	TS_5	D	10	3	TEF1P-NAT1-TEF1T (based on pJK863)	HTL	Other
809	918	TS330	barcode set	CAGL0C00869g		YKL161C	ATATAGCGTGACAGAGTACG	GCGAGACCGCTTTACCAGAT	TS_5	F	2	1	TEF1P-NAT1-TEF1T (based on pJK863)	HTL	Other
810	919	TS331	barcode set	CAGL0D05654g	SDS23	YGL056C	TAAGAATCGTTAGCAAGGCC	GCGAGACCGCTTTACCAGAT	TS_5	G	5	1	TEF1P-NAT1-TEF1T (based on pJK863)	HTL	Other
811	922	TS332	barcode set	CAGL0M09449g	ECM21	YBL101C	CCGTTATACGAATATCGACC	GCGAGACCGCTTTACCAGAT	TS_5	D	8	2	TEF1P-NAT1-TEF1T (based on pJK863)	HTL	Cell wall organization
812	923	TS333	barcode set	CAGL0C01111g	PPZ1	YML016C	ATATACGTGGAATGACTGGC	GCGAGACCGCTTTACCAGAT	TS_5	F	3	2	TEF1P-NAT1-TEF1T (based on pJK863)	HTL	Other
813	924	TS334	barcode set	CAGL0A00583g	PDR8	YLR266C	GCTACAAACATAAGTGCGGC	GCGAGACCGCTTTACCAGAT	TS_6	A	3	1	TEF1P-NAT1-TEF1T (based on pJK863)	HTL	Transcriptional regulation
814	927	TS336	barcode set	CAGL0B00440g	UTP14	YML093W	AAGATAGTCGCCGAACTCGC	GCGAGACCGCTTTACCAGAT	TS_6	A	5	1	TEF1P-NAT1-TEF1T (based on pJK863)	HTL	Other
815	930	TS336	barcode set	CAGL0B02651g	MET32	YDR253C	ATCGAGCACGTAACCGTTGC	GCGAGACCGCTTTACCAGAT	TS_6	A	6	1	TEF1P-NAT1-TEF1T (based on pJK863)	HTL	Transcriptional regulation
816	931	TS336	barcode set	CAGL0B02651g	MET32	YDR253C	ATCGAGCACGTAACCGTTGC	GCGAGACCGCTTTACCAGAT	TS_6	A	6	2	TEF1P-NAT1-TEF1T (based on pJK863)	HTL	Transcriptional regulation
817	932	TS337	barcode set	CAGL0B03355g	DPB3	YBR278W	AATGTCGCGTAATGGCTTAG	GCGAGACCGCTTTACCAGAT	TS_6	A	7	1	TEF1P-NAT1-TEF1T (based on pJK863)	HTL	Transcriptional regulation
818	933	TS337	barcode set	CAGL0B03355g	DPB3	YBR278W	AATGTCGCGTAATGGCTTAG	GCGAGACCGCTTTACCAGAT	TS_6	A	7	2	TEF1P-NAT1-TEF1T (based on pJK863)	HTL	Transcriptional regulation
819	934	TS337	barcode set	CAGL0B03355g	DPB3	YBR278W	AATGTCGCGTAATGGCTTAG	GCGAGACCGCTTTACCAGAT	TS_6	A	7	3	TEF1P-NAT1-TEF1T (based on pJK863)	HTL	Transcriptional regulation
820	935	TS338	barcode set	CAGL0C00583g	SHE3	YBR130C	CGGATATGTACTAATTGGGC	GCGAGACCGCTTTACCAGAT	TS_6	A	9	1	TEF1P-NAT1-TEF1T (based on pJK863)	HTL	Transcriptional regulation
821	936	TS338	barcode set	CAGL0C00583g	SHE3	YBR130C	CGGATATGTACTAATTGGGC	GCGAGACCGCTTTACCAGAT	TS_6	A	9	2	TEF1P-NAT1-TEF1T (based on pJK863)	HTL	Transcriptional regulation
822	937	TS338	barcode set	CAGL0C00583g	SHE3	YBR130C	CGGATATGTACTAATTGGGC	GCGAGACCGCTTTACCAGAT	TS_6	A	9	3	TEF1P-NAT1-TEF1T (based on pJK863)	HTL	Transcriptional regulation
823	938	TS339	barcode set	CAGL0C02739g	FUN14	YAL008W	AATCGACTGTAAGTATCGCG	GCGAGACCGCTTTACCAGAT	TS_6	A	11	1	TEF1P-NAT1-TEF1T (based on pJK863)	HTL	Other
824	941	TS340	barcode set	CAGL0D01210g	ROK1	YGL171W	ATCGGCCTGTAATCGGATCG	GCGAGACCGCTTTACCAGAT	TS_6	B	1	1	TEF1P-NAT1-TEF1T (based on pJK863)	HTL	Other
825	942	TS340	barcode set	CAGL0D01210g	ROK1	YGL171W	ATCGGCCTGTAATCGGATCG	GCGAGACCGCTTTACCAGAT	TS_6	B	1	2	TEF1P-NAT1-TEF1T (based on pJK863)	HTL	Other
826	943	TS340	barcode set	CAGL0D01210g	ROK1	YGL171W	ATCGGCCTGTAATCGGATCG	GCGAGACCGCTTTACCAGAT	TS_6	B	1	3	TEF1P-NAT1-TEF1T (based on pJK863)	HTL	Other
827	944	TS341	barcode set	CAGL0F00209g	SEO1	YAL067C	GCATTAACGGGAACTAGAGC	GCGAGACCGCTTTACCAGAT	TS_6	B	6	1	TEF1P-NAT1-TEF1T (based on pJK863)	HTL	Other
828	945	TS342	barcode set	CAGL0F03619g	NIP100	YPL174C	GCCATTCGTATAACCGTGTC	GCGAGACCGCTTTACCAGAT	TS_6	B	7	1	TEF1P-NAT1-TEF1T (based on pJK863)	HTL	Other
829	946	TS343	barcode set	CAGL0F06787g	MND2	YIR025W	GTATTCCGACTGCGGCACTT	GCGAGACCGCTTTACCAGAT	TS_6	B	9	1	TEF1P-NAT1-TEF1T (based on pJK863)	HTL	Other
830	947	TS343	barcode set	CAGL0F06787g	MND2	YIR025W	GTATTCCGACTGCGGCACTT	GCGAGACCGCTTTACCAGAT	TS_6	B	9	2	TEF1P-NAT1-TEF1T (based on pJK863)	HTL	Other
831	952	TS344	barcode set	CAGL0H06347g	DEP1	YAL013W	CGCGCAGAGGTTAGATAAAT	GCGAGACCGCTTTACCAGAT	TS_6	C	1	1	TEF1P-NAT1-TEF1T (based on pJK863)	HTL	Transcriptional regulation
832	954	TS345	barcode set	CAGL0I03432g		YDL160C-A	CGACCCTGATGATCCTTTAT	GCGAGACCGCTTTACCAGAT	TS_6	C	2	1	TEF1P-NAT1-TEF1T (based on pJK863)	HTL	Transcriptional regulation
833	957	TS346	barcode set	CAGL0I10769g	MCM1a	YMR043W	GTGCGAACCAACGTACTACA	GCGAGACCGCTTTACCAGAT	TS_6	C	5	1	TEF1P-NAT1-TEF1T (based on pJK863)	HTL	Transcriptional regulation
834	958	TS346	barcode set	CAGL0I10769g	MCM1a	YMR043W	GTGCGAACCAACGTACTACA	GCGAGACCGCTTTACCAGAT	TS_6	C	5	2	TEF1P-NAT1-TEF1T (based on pJK863)	HTL	Transcriptional regulation
835	959	TS347	barcode set	CAGL0J06490g	CUE1	YMR264W	GGGTACTCCACAACATTACA	GCGAGACCGCTTTACCAGAT	TS_6	C	6	1	TEF1P-NAT1-TEF1T (based on pJK863)	HTL	Other
836	960	TS347	barcode set	CAGL0J06490g	CUE1	YMR264W	GGGTACTCCACAACATTACA	GCGAGACCGCTTTACCAGAT	TS_6	C	6	2	TEF1P-NAT1-TEF1T (based on pJK863)	HTL	Other
837	962	TS348	barcode set	CAGL0J10582g	PSP2	YML017W	GCTAATCGCTAATTCGTTCC	GCGAGACCGCTTTACCAGAT	TS_6	C	7	1	TEF1P-NAT1-TEF1T (based on pJK863)	HTL	Other
838	963	TS348	barcode set	CAGL0J10582g	PSP2	YML017W	GCTAATCGCTAATTCGTTCC	GCGAGACCGCTTTACCAGAT	TS_6	C	7	2	TEF1P-NAT1-TEF1T (based on pJK863)	HTL	Other
839	964	TS348	barcode set	CAGL0J10582g	PSP2	YML017W	GCTAATCGCTAATTCGTTCC	GCGAGACCGCTTTACCAGAT	TS_6	C	7	3	TEF1P-NAT1-TEF1T (based on pJK863)	HTL	Other
840	965	TS349	barcode set	CAGL0K08690g		YOL036W	GTATTCCGACTGCGGCACTT	GCGAGACCGCTTTACCAGAT	TS_6	C	11	1	TEF1P-NAT1-TEF1T (based on pJK863)	HTL	Other
841	966	TS349	barcode set	CAGL0K08690g		YOL036W	GTATTCCGACTGCGGCACTT	GCGAGACCGCTTTACCAGAT	TS_6	C	11	2	TEF1P-NAT1-TEF1T (based on pJK863)	HTL	Other
842	968	TS349	barcode set	CAGL0K12320g		YBR108W	TAATACCCGATCACTGGTGG	GCGAGACCGCTTTACCAGAT	TS_6	C	12	1	TEF1P-NAT1-TEF1T (based on pJK863)	HTL	Other
843	969	TS350	barcode set	CAGL0L06226g	HEK2	YBL032W	ATTACCTAGTCGGAGACAGG	GCGAGACCGCTTTACCAGAT	TS_6	D	3	1	TEF1P-NAT1-TEF1T (based on pJK863)	HTL	Chromatin
844	970	TS349	barcode set	CAGL0K12320g		YBR108W	TAATACCCGATCACTGGTGG	GCGAGACCGCTTTACCAGAT	TS_6	C	12	2	TEF1P-NAT1-TEF1T (based on pJK863)	HTL	Other
845	971	TS349	barcode set	CAGL0K12320g		YBR108W	TAATACCCGATCACTGGTGG	GCGAGACCGCTTTACCAGAT	TS_6	C	12	3	TEF1P-NAT1-TEF1T (based on pJK863)	HTL	Other
846	972	TS351	barcode set	CAGL0M08778g	SWM1	YDR260C	ATTAGCGTCTCGACTACCTT	GCGAGACCGCTTTACCAGAT	TS_6	D	4	1	TEF1P-NAT1-TEF1T (based on pJK863)	HTL	Chromatin
847	973	TS351	barcode set	CAGL0M08778g	SWM1	YDR260C	ATTAGCGTCTCGACTACCTT	GCGAGACCGCTTTACCAGAT	TS_6	D	4	2	TEF1P-NAT1-TEF1T (based on pJK863)	HTL	Chromatin
848	974	TS351	barcode set	CAGL0M08778g	SWM1	YDR260C	ATTAGCGTCTCGACTACCTT	GCGAGACCGCTTTACCAGAT	TS_6	D	4	3	TEF1P-NAT1-TEF1T (based on pJK863)	HTL	Chromatin
849	975	TS352	barcode set	CAGL0M12507g		YIL056W	ACCGACGGCTTAGCGATCTT	GCGAGACCGCTTTACCAGAT	TS_6	D	5	1	TEF1P-NAT1-TEF1T (based on pJK863)	HTL	Other
850	976	TS352	barcode set	CAGL0M12507g		YIL056W	ACCGACGGCTTAGCGATCTT	GCGAGACCGCTTTACCAGAT	TS_6	D	5	2	TEF1P-NAT1-TEF1T (based on pJK863)	HTL	Other
851	978	TS354	barcode set	CAGL0J04312g	PEP1	YBL017C	CCGGCTAGTTAATTTGACTC	GCGAGACCGCTTTACCAGAT	TS_6	D	10	1	TEF1P-NAT1-TEF1T (based on pJK863)	HTL	Vacuole, Golgi
852	980	TS355	barcode set	CAGL0G02717g	SGA1	YIL099W	TATAGTTCGGGCCATACGGT	GCGAGACCGCTTTACCAGAT	TS_6	E	2	1	TEF1P-NAT1-TEF1T (based on pJK863)	HTL	Vacuole, Golgi
853	984	TS357	barcode set	CAGL0J02288g	BAR1	YIL015W	TTACTTGCCCGAGCCGGATT	GCGAGACCGCTTTACCAGAT	TS_6	E	4	1	TEF1P-NAT1-TEF1T (based on pJK863)	HTL	Signal transduction
854	985	TS357	barcode set	CAGL0J02288g	BAR1	YIL015W	TTACTTGCCCGAGCCGGATT	GCGAGACCGCTTTACCAGAT	TS_6	E	4	2	TEF1P-NAT1-TEF1T (based on pJK863)	HTL	Signal transduction
855	987	TS358	barcode set	CAGL0A02431g	YPS7	YDR349C	TATTAGTGCGGACCCGGCTT	GCGAGACCGCTTTACCAGAT	TS_6	E	5	1	TEF1P-NAT1-TEF1T (based on pJK863)	HTL	Cell wall organization
856	988	TS358	barcode set	CAGL0A02431g	YPS7	YDR349C	TATTAGTGCGGACCCGGCTT	GCGAGACCGCTTTACCAGAT	TS_6	E	5	2	TEF1P-NAT1-TEF1T (based on pJK863)	HTL	Cell wall organization
857	989	TS358	barcode set	CAGL0A02431g	YPS7	YDR349C	TATTAGTGCGGACCCGGCTT	GCGAGACCGCTTTACCAGAT	TS_6	E	5	3	TEF1P-NAT1-TEF1T (based on pJK863)	HTL	Cell wall organization
858	990	TS359	barcode set	CAGL0E06556g	ISC1	YER019W	TTCTACCGTCGGAGGCAGTT	GCGAGACCGCTTTACCAGAT	TS_6	E	6	1	TEF1P-NAT1-TEF1T (based on pJK863)	HTL	Cell wall organization
859	991	TS359	barcode set	CAGL0E06556g	ISC1	YER019W	TTCTACCGTCGGAGGCAGTT	GCGAGACCGCTTTACCAGAT	TS_6	E	6	2	TEF1P-NAT1-TEF1T (based on pJK863)	HTL	Cell wall organization
860	992	TS359	barcode set	CAGL0E06556g	ISC1	YER019W	TTCTACCGTCGGAGGCAGTT	GCGAGACCGCTTTACCAGAT	TS_6	E	6	3	TEF1P-NAT1-TEF1T (based on pJK863)	HTL	Cell wall organization
861	996	TS361	barcode set	CAGL0H03575g	SPO1	YNL012W	AATCGGTACTAAGTCGGTTC	GCGAGACCGCTTTACCAGAT	TS_6	E	9	1	TEF1P-NAT1-TEF1T (based on pJK863)	HTL	Other
862	997	TS362	barcode set	CAGL0L03135g	SPO14	YKR031C	CCCGATTGGTTAATACCGAT	GCGAGACCGCTTTACCAGAT	TS_6	E	10	1	TEF1P-NAT1-TEF1T (based on pJK863)	HTL	Other
863	998	TS362	barcode set	CAGL0L03135g	SPO14	YKR031C	CCCGATTGGTTAATACCGAT	GCGAGACCGCTTTACCAGAT	TS_6	E	10	2	TEF1P-NAT1-TEF1T (based on pJK863)	HTL	Other
864	1000	TS363	barcode set	CAGL0E04510g		YOR022C	GCGCTGCAATCAGAAAGGTA	GCGAGACCGCTTTACCAGAT	TS_6	E	12	1	TEF1P-NAT1-TEF1T (based on pJK863)	HTL	Other
865	1001	TS363	barcode set	CAGL0E04510g		YOR022C	GCGCTGCAATCAGAAAGGTA	GCGAGACCGCTTTACCAGAT	TS_6	E	12	2	TEF1P-NAT1-TEF1T (based on pJK863)	HTL	Other
866	1003	TS364	barcode set	CAGL0G03267g	AST1	YBL069W	ATATAGCGTGACAGAGTACG	GCGAGACCGCTTTACCAGAT	TS_6	F	2	1	TEF1P-NAT1-TEF1T (based on pJK863)	HTL	Other
867	1004	TS364	barcode set	CAGL0G03267g	AST1	YBL069W	ATATAGCGTGACAGAGTACG	GCGAGACCGCTTTACCAGAT	TS_6	F	2	2	TEF1P-NAT1-TEF1T (based on pJK863)	HTL	Other
868	1005	TS365	barcode set	CAGL0G09999g	ATG13	YPR185W	ACATGGTTGAAAGCGCGTCA	GCGAGACCGCTTTACCAGAT	TS_6	F	4	1	TEF1P-NAT1-TEF1T (based on pJK863)	HTL	Signal transduction
869	1006	TS365	barcode set	CAGL0G09999g	ATG13	YPR185W	ACATGGTTGAAAGCGCGTCA	GCGAGACCGCTTTACCAGAT	TS_6	F	4	2	TEF1P-NAT1-TEF1T (based on pJK863)	HTL	Signal transduction
870	1008	TS366	barcode set	CAGL0M02431g	KES1	YPL145C	GAGCTTGACTCACCGTCTTG	GCGAGACCGCTTTACCAGAT	TS_6	F	8	1	TEF1P-NAT1-TEF1T (based on pJK863)	HTL	Other
871	1011	TS367	barcode set	CAGL0M03707g	MON2	YNL297C	GCGGCGGATATGCTATAAAT	GCGAGACCGCTTTACCAGAT	TS_6	F	9	1	TEF1P-NAT1-TEF1T (based on pJK863)	HTL	Vacuole, Golgi
872	1013	TS368	barcode set	CAGL0I09130g	PTR3	YFR029W	TACTCGGCAACAGGTCGGTA	GCGAGACCGCTTTACCAGAT	TS_6	F	10	1	TEF1P-NAT1-TEF1T (based on pJK863)	HTL	Other
873	1014	TS368	barcode set	CAGL0I09130g	PTR3	YFR029W	TACTCGGCAACAGGTCGGTA	GCGAGACCGCTTTACCAGAT	TS_6	F	10	2	TEF1P-NAT1-TEF1T (based on pJK863)	HTL	Other
874	1016	TS369	barcode set	CAGL0I06116g	SSY5	YJL156C	GGGCTACCTCTCAATTATAC	GCGAGACCGCTTTACCAGAT	TS_6	F	12	1	TEF1P-NAT1-TEF1T (based on pJK863)	HTL	Other
875	1017	TS370	barcode set	CAGL0K12254g	VID24	YBR105C	GCCCACATGGATAACATTAC	GCGAGACCGCTTTACCAGAT	TS_6	G	1	1	TEF1P-NAT1-TEF1T (based on pJK863)	HTL	Vacuole, Golgi
876	1018	TS371	barcode set	CAGL0H03993g	CIT1	YNR001C	AGACTAAGACCATTGTACCC	GCGAGACCGCTTTACCAGAT	TS_6	G	2	1	TEF1P-NAT1-TEF1T (based on pJK863)	HTL	Other
877	1019	TS371	barcode set	CAGL0H03993g	CIT1	YNR001C	AGACTAAGACCATTGTACCC	GCGAGACCGCTTTACCAGAT	TS_6	G	2	2	TEF1P-NAT1-TEF1T (based on pJK863)	HTL	Other
878	1020	TS372	barcode set	CAGL0L06798g	MDH3	YDL078C	GTGCGAACCAACGTACTACA	GCGAGACCGCTTTACCAGAT	TS_6	G	3	1	TEF1P-NAT1-TEF1T (based on pJK863)	HTL	Transcriptional regulation
879	1022	TS373	barcode set	CAGL0J03058g	ICL1	YER065C	GCCCAAATAAGACGTGAGCC	GCGAGACCGCTTTACCAGAT	TS_6	G	4	1	TEF1P-NAT1-TEF1T (based on pJK863)	HTL	Other
880	1023	TS373	barcode set	CAGL0J03058g	ICL1	YER065C	GCCCAAATAAGACGTGAGCC	GCGAGACCGCTTTACCAGAT	TS_6	G	4	2	TEF1P-NAT1-TEF1T (based on pJK863)	HTL	Other
881	1024	TS373	barcode set	CAGL0J03058g	ICL1	YER065C	GCCCAAATAAGACGTGAGCC	GCGAGACCGCTTTACCAGAT	TS_6	G	4	3	TEF1P-NAT1-TEF1T (based on pJK863)	HTL	Other
882	1025	TS374	barcode set	CAGL0F02431g		YJL200C	TAAGAATCGTTAGCAAGGCC	GCGAGACCGCTTTACCAGAT	TS_6	G	5	1	TEF1P-NAT1-TEF1T (based on pJK863)	HTL	Other
883	1026	TS374	barcode set	CAGL0F02431g		YJL200C	TAAGAATCGTTAGCAAGGCC	GCGAGACCGCTTTACCAGAT	TS_6	G	5	2	TEF1P-NAT1-TEF1T (based on pJK863)	HTL	Other
884	1027	TS374	barcode set	CAGL0F02431g		YJL200C	TAAGAATCGTTAGCAAGGCC	GCGAGACCGCTTTACCAGAT	TS_6	G	5	3	TEF1P-NAT1-TEF1T (based on pJK863)	HTL	Other
885	1028	TS375	barcode set	CAGL0D06424g	ACO1	YLR304C	AGAGATTCGCTTAACGCCCG	GCGAGACCGCTTTACCAGAT	TS_6	G	6	1	TEF1P-NAT1-TEF1T (based on pJK863)	HTL	Other
886	1029	TS376	barcode set	CAGL0E01705g	MDH2	YOL126C	TGCGCGGTCAAACCAAGCAA	GCGAGACCGCTTTACCAGAT	TS_6	G	8	1	TEF1P-NAT1-TEF1T (based on pJK863)	HTL	Other
887	1030	TS376	barcode set	CAGL0E01705g	MDH2	YOL126C	TGCGCGGTCAAACCAAGCAA	GCGAGACCGCTTTACCAGAT	TS_6	G	8	2	TEF1P-NAT1-TEF1T (based on pJK863)	HTL	Other
888	1031	TS377	barcode set	CAGL0F08041g	PFK1	YGR240C	TTCACCGAGACAAGGCGAGA	GCGAGACCGCTTTACCAGAT	TS_6	G	9	1	TEF1P-NAT1-TEF1T (based on pJK863)	HTL	Other
889	1032	TS370	barcode set	CAGL0K12254g	VID24	YBR105C	GCCCACATGGATAACATTAC	GCGAGACCGCTTTACCAGAT	TS_6	G	1	2	TEF1P-NAT1-TEF1T (based on pJK863)	HTL	Vacuole, Golgi
890	1033	TS370	barcode set	CAGL0K12254g	VID24	YBR105C	GCCCACATGGATAACATTAC	GCGAGACCGCTTTACCAGAT	TS_6	G	1	3	TEF1P-NAT1-TEF1T (based on pJK863)	HTL	Vacuole, Golgi
891	1034	TS378	barcode set	CAGL0H06633g	PCK1	YKR097W	TACTGACGCGGGACTGACTT	GCGAGACCGCTTTACCAGAT	TS_6	G	11	1	TEF1P-NAT1-TEF1T (based on pJK863)	HTL	Other
892	1038	TS380	barcode set	CAGL0H09460g	FAA2	YER015W	AAGCCAAACGAACTTGCGGC	GCGAGACCGCTTTACCAGAT	TS_6	H	4	1	TEF1P-NAT1-TEF1T (based on pJK863)	HTL	Other
893	1039	TS380	barcode set	CAGL0H09460g	FAA2	YER015W	AAGCCAAACGAACTTGCGGC	GCGAGACCGCTTTACCAGAT	TS_6	H	4	2	TEF1P-NAT1-TEF1T (based on pJK863)	HTL	Other
894	1041	TS381	barcode set	CAGL0H08437g	VPS15	YBR097W	CCGAGTTAGGAATGTTATGC	GCGAGACCGCTTTACCAGAT	TS_6	H	5	1	TEF1P-NAT1-TEF1T (based on pJK863)	HTL	Vacuole, Golgi
895	1044	TS382	barcode set	CAGL0B04147g	DBF20	YPR111W	ATTGAGCCTGACCACATGCG	GCGAGACCGCTTTACCAGAT	TS_6	H	7	1	TEF1P-NAT1-TEF1T (based on pJK863)	HTL	Signal transduction
896	1051	TS385	barcode set	CAGL0G02607g	PRK1	YIL095W	CGATTCGATAAATGACGCGA	GCGAGACCGCTTTACCAGAT	TS_7	A	2	1	TEF1P-NAT1-TEF1T (based on pJK863)	HTL	Signal transduction
897	1052	TS385	barcode set	CAGL0G02607g	PRK1	YIL095W	CGATTCGATAAATGACGCGA	GCGAGACCGCTTTACCAGAT	TS_7	A	2	2	TEF1P-NAT1-TEF1T (based on pJK863)	HTL	Signal transduction
898	1053	TS385	barcode set	CAGL0G02607g	PRK1	YIL095W	CGATTCGATAAATGACGCGA	GCGAGACCGCTTTACCAGAT	TS_7	A	2	3	TEF1P-NAT1-TEF1T (based on pJK863)	HTL	Signal transduction
899	1054	TS386	barcode set	CAGL0K03399g	YPK1	YKL126W	ATCGAACGTGTGTCAAACGC	GCGAGACCGCTTTACCAGAT	TS_7	A	4	1	TEF1P-NAT1-TEF1T (based on pJK863)	HTL	Signal transduction
900	1055	TS386	barcode set	CAGL0K03399g	YPK1	YKL126W	ATCGAACGTGTGTCAAACGC	GCGAGACCGCTTTACCAGAT	TS_7	A	4	2	TEF1P-NAT1-TEF1T (based on pJK863)	HTL	Signal transduction
901	1056	TS386	barcode set	CAGL0K03399g	YPK1	YKL126W	ATCGAACGTGTGTCAAACGC	GCGAGACCGCTTTACCAGAT	TS_7	A	4	3	TEF1P-NAT1-TEF1T (based on pJK863)	HTL	Signal transduction
902	1057	TS387	barcode set	CAGL0F00913g	PSK2	YOL045W	ATCGAGCACGTAACCGTTGC	GCGAGACCGCTTTACCAGAT	TS_7	A	6	1	TEF1P-NAT1-TEF1T (based on pJK863)	HTL	Signal transduction
903	1058	TS387	barcode set	CAGL0F00913g	PSK2	YOL045W	ATCGAGCACGTAACCGTTGC	GCGAGACCGCTTTACCAGAT	TS_7	A	6	2	TEF1P-NAT1-TEF1T (based on pJK863)	HTL	Signal transduction
904	1059	TS387	barcode set	CAGL0F00913g	PSK2	YOL045W	ATCGAGCACGTAACCGTTGC	GCGAGACCGCTTTACCAGAT	TS_7	A	6	3	TEF1P-NAT1-TEF1T (based on pJK863)	HTL	Signal transduction
905	1060	TS388	barcode set	CAGL0D02244g	MEK1	YOR351C	AATGTCGCGTAATGGCTTAG	GCGAGACCGCTTTACCAGAT	TS_7	A	7	1	TEF1P-NAT1-TEF1T (based on pJK863)	HTL	Signal transduction
906	1061	TS388	barcode set	CAGL0D02244g	MEK1	YOR351C	AATGTCGCGTAATGGCTTAG	GCGAGACCGCTTTACCAGAT	TS_7	A	7	2	TEF1P-NAT1-TEF1T (based on pJK863)	HTL	Signal transduction
907	1062	TS388	barcode set	CAGL0D02244g	MEK1	YOR351C	AATGTCGCGTAATGGCTTAG	GCGAGACCGCTTTACCAGAT	TS_7	A	7	3	TEF1P-NAT1-TEF1T (based on pJK863)	HTL	Signal transduction
908	1063	TS389	barcode set	CAGL0K00693g	SWE1	YJL187C	AGGCAGATACGATTAGTACG	GCGAGACCGCTTTACCAGAT	TS_7	A	8	1	TEF1P-NAT1-TEF1T (based on pJK863)	HTL	Signal transduction
909	1064	TS389	barcode set	CAGL0K00693g	SWE1	YJL187C	AGGCAGATACGATTAGTACG	GCGAGACCGCTTTACCAGAT	TS_7	A	8	2	TEF1P-NAT1-TEF1T (based on pJK863)	HTL	Signal transduction
910	1065	TS389	barcode set	CAGL0K00693g	SWE1	YJL187C	AGGCAGATACGATTAGTACG	GCGAGACCGCTTTACCAGAT	TS_7	A	8	3	TEF1P-NAT1-TEF1T (based on pJK863)	HTL	Signal transduction
911	1066	TS390	barcode set	CAGL0D01694g	SMK1	YPR054W	CGGATATGTACTAATTGGGC	GCGAGACCGCTTTACCAGAT	TS_7	A	9	1	TEF1P-NAT1-TEF1T (based on pJK863)	HTL	Signal transduction
912	1067	TS390	barcode set	CAGL0D01694g	SMK1	YPR054W	CGGATATGTACTAATTGGGC	GCGAGACCGCTTTACCAGAT	TS_7	A	9	2	TEF1P-NAT1-TEF1T (based on pJK863)	HTL	Signal transduction
913	1068	TS391	barcode set	CAGL0E01683g	MCK1	YNL307C	ATAGATGACTACCGCGTCCG	GCGAGACCGCTTTACCAGAT	TS_7	A	10	1	TEF1P-NAT1-TEF1T (based on pJK863)	HTL	Signal transduction
914	1069	TS391	barcode set	CAGL0E01683g	MCK1	YNL307C	ATAGATGACTACCGCGTCCG	GCGAGACCGCTTTACCAGAT	TS_7	A	10	2	TEF1P-NAT1-TEF1T (based on pJK863)	HTL	Signal transduction
915	1070	TS391	barcode set	CAGL0E01683g	MCK1	YNL307C	ATAGATGACTACCGCGTCCG	GCGAGACCGCTTTACCAGAT	TS_7	A	10	3	TEF1P-NAT1-TEF1T (based on pJK863)	HTL	Signal transduction
916	1071	TS392	barcode set	CAGL0I05192g	CKA1	YIL035C	AATCGACTGTAAGTATCGCG	GCGAGACCGCTTTACCAGAT	TS_7	A	11	1	TEF1P-NAT1-TEF1T (based on pJK863)	HTL	Signal transduction
917	1072	TS392	barcode set	CAGL0I05192g	CKA1	YIL035C	AATCGACTGTAAGTATCGCG	GCGAGACCGCTTTACCAGAT	TS_7	A	11	2	TEF1P-NAT1-TEF1T (based on pJK863)	HTL	Signal transduction
918	1073	TS393	barcode set	CAGL0G02035g	CKA2	YOR061W	ATAGCCTTCTAAGAGCGGCG	GCGAGACCGCTTTACCAGAT	TS_7	A	12	1	TEF1P-NAT1-TEF1T (based on pJK863)	HTL	Signal transduction
919	1074	TS393	barcode set	CAGL0G02035g	CKA2	YOR061W	ATAGCCTTCTAAGAGCGGCG	GCGAGACCGCTTTACCAGAT	TS_7	A	12	2	TEF1P-NAT1-TEF1T (based on pJK863)	HTL	Signal transduction
920	1075	TS393	barcode set	CAGL0G02035g	CKA2	YOR061W	ATAGCCTTCTAAGAGCGGCG	GCGAGACCGCTTTACCAGAT	TS_7	A	12	3	TEF1P-NAT1-TEF1T (based on pJK863)	HTL	Signal transduction
921	1076	TS394	barcode set	CAGL0I00946g	CKB2	YOR039W	GTGAGCGAAACACCGCGTAA	GCGAGACCGCTTTACCAGAT	TS_7	B	2	1	TEF1P-NAT1-TEF1T (based on pJK863)	HTL	Signal transduction
922	1077	TS394	barcode set	CAGL0I00946g	CKB2	YOR039W	GTGAGCGAAACACCGCGTAA	GCGAGACCGCTTTACCAGAT	TS_7	B	2	2	TEF1P-NAT1-TEF1T (based on pJK863)	HTL	Signal transduction
923	1078	TS394	barcode set	CAGL0I00946g	CKB2	YOR039W	GTGAGCGAAACACCGCGTAA	GCGAGACCGCTTTACCAGAT	TS_7	B	2	3	TEF1P-NAT1-TEF1T (based on pJK863)	HTL	Signal transduction
924	1079	TS395	barcode set	CAGL0L07326g	DUN1	YDL101C	GGGTACTCCACAACATTACA	GCGAGACCGCTTTACCAGAT	TS_7	B	4	1	TEF1P-NAT1-TEF1T (based on pJK863)	HTL	Signal transduction
925	1080	TS395	barcode set	CAGL0L07326g	DUN1	YDL101C	GGGTACTCCACAACATTACA	GCGAGACCGCTTTACCAGAT	TS_7	B	4	2	TEF1P-NAT1-TEF1T (based on pJK863)	HTL	Signal transduction
926	1081	TS396	barcode set	CAGL0K10604g	CMK2	YOL016C	GATTATACGCTATCCGAGGT	GACTCCGTACTCACTAGGAT	TS_7	B	8	1	TEF1P-NAT1-TEF1T (based on pJK863)	HTL	Signal transduction
927	1082	TS396	barcode set	CAGL0K10604g	CMK2	YOL016C	GATTATACGCTATCCGAGGT	GACTCCGTACTCACTAGGAT	TS_7	B	8	2	TEF1P-NAT1-TEF1T (based on pJK863)	HTL	Signal transduction
928	1083	TS396	barcode set	CAGL0K10604g	CMK2	YOL016C	GATTATACGCTATCCGAGGT	GACTCCGTACTCACTAGGAT	TS_7	B	8	3	TEF1P-NAT1-TEF1T (based on pJK863)	HTL	Signal transduction
929	1084	TS397	barcode set	CAGL0F04741g	CMK2	YOL016C	GTATTCCGACTGCGGCACTT	GCGAGACCGCTTTACCAGAT	TS_7	B	9	1	TEF1P-NAT1-TEF1T (based on pJK863)	HTL	Signal transduction
930	1085	TS397	barcode set	CAGL0F04741g	CMK2	YOL016C	GTATTCCGACTGCGGCACTT	GCGAGACCGCTTTACCAGAT	TS_7	B	9	2	TEF1P-NAT1-TEF1T (based on pJK863)	HTL	Signal transduction
931	1086	TS397	barcode set	CAGL0F04741g	CMK2	YOL016C	GTATTCCGACTGCGGCACTT	GCGAGACCGCTTTACCAGAT	TS_7	B	9	3	TEF1P-NAT1-TEF1T (based on pJK863)	HTL	Signal transduction
932	1087	TS398	barcode set	CAGL0E06028g	ALG5	YPL227C	CGCGCAGAGGTTAGATAAAT	GCGAGACCGCTTTACCAGAT	TS_7	C	1	1	TEF1P-NAT1-TEF1T (based on pJK863)	HTL	Cell wall organization
933	1088	TS398	barcode set	CAGL0E06028g	ALG5	YPL227C	CGCGCAGAGGTTAGATAAAT	GCGAGACCGCTTTACCAGAT	TS_7	C	1	2	TEF1P-NAT1-TEF1T (based on pJK863)	HTL	Cell wall organization
934	1089	TS399	barcode set	CAGL0E02629g	ALG6	YOR002W	CGACCCTGATGATCCTTTAT	GCGAGACCGCTTTACCAGAT	TS_7	C	2	1	TEF1P-NAT1-TEF1T (based on pJK863)	HTL	Cell wall organization
935	1090	TS399	barcode set	CAGL0E02629g	ALG6	YOR002W	CGACCCTGATGATCCTTTAT	GCGAGACCGCTTTACCAGAT	TS_7	C	2	2	TEF1P-NAT1-TEF1T (based on pJK863)	HTL	Cell wall organization
936	1091	TS399	barcode set	CAGL0E02629g	ALG6	YOR002W	CGACCCTGATGATCCTTTAT	GCGAGACCGCTTTACCAGAT	TS_7	C	2	3	TEF1P-NAT1-TEF1T (based on pJK863)	HTL	Cell wall organization
937	1092	TS400	barcode set	CAGL0J08569g	OST3	YOR085W	GCATTAACGGGAACTAGAGC	GCGAGACCGCTTTACCAGAT	TS_7	C	8	1	TEF1P-NAT1-TEF1T (based on pJK863)	HTL	Cell wall organization
938	1093	TS400	barcode set	CAGL0J08569g	OST3	YOR085W	GCATTAACGGGAACTAGAGC	GCGAGACCGCTTTACCAGAT	TS_7	C	8	2	TEF1P-NAT1-TEF1T (based on pJK863)	HTL	Cell wall organization
939	1094	TS400	barcode set	CAGL0J08569g	OST3	YOR085W	GCATTAACGGGAACTAGAGC	GCGAGACCGCTTTACCAGAT	TS_7	C	8	3	TEF1P-NAT1-TEF1T (based on pJK863)	HTL	Cell wall organization
940	1095	TS401	barcode set	CAGL0G07040g	OST6	YML019W	GTATTCCGACTGCGGCACTT	GCGAGACCGCTTTACCAGAT	TS_7	C	11	1	TEF1P-NAT1-TEF1T (based on pJK863)	HTL	Cell wall organization
941	1096	TS401	barcode set	CAGL0G07040g	OST6	YML019W	GTATTCCGACTGCGGCACTT	GCGAGACCGCTTTACCAGAT	TS_7	C	11	2	TEF1P-NAT1-TEF1T (based on pJK863)	HTL	Cell wall organization
942	1097	TS401	barcode set	CAGL0G07040g	OST6	YML019W	GTATTCCGACTGCGGCACTT	GCGAGACCGCTTTACCAGAT	TS_7	C	11	3	TEF1P-NAT1-TEF1T (based on pJK863)	HTL	Cell wall organization
943	1098	TS402	barcode set	CAGL0A04587g	RHK1	YBL082C	TAATACCCGATCACTGGTGG	GCGAGACCGCTTTACCAGAT	TS_7	C	12	1	TEF1P-NAT1-TEF1T (based on pJK863)	HTL	Cell wall organization
944	1099	TS402	barcode set	CAGL0A04587g	RHK1	YBL082C	TAATACCCGATCACTGGTGG	GCGAGACCGCTTTACCAGAT	TS_7	C	12	2	TEF1P-NAT1-TEF1T (based on pJK863)	HTL	Cell wall organization
945	1100	TS402	barcode set	CAGL0A04587g	RHK1	YBL082C	TAATACCCGATCACTGGTGG	GCGAGACCGCTTTACCAGAT	TS_7	C	12	3	TEF1P-NAT1-TEF1T (based on pJK863)	HTL	Cell wall organization
946	1101	TS403	barcode set	CAGL0L01331g	ANP1	YEL036C	ACCGACGGCTTAGCGATCTT	GCGAGACCGCTTTACCAGAT	TS_7	D	5	1	TEF1P-NAT1-TEF1T (based on pJK863)	HTL	Cell wall organization
947	1102	TS403	barcode set	CAGL0L01331g	ANP1	YEL036C	ACCGACGGCTTAGCGATCTT	GCGAGACCGCTTTACCAGAT	TS_7	D	5	2	TEF1P-NAT1-TEF1T (based on pJK863)	HTL	Cell wall organization
948	1103	TS404	barcode set	CAGL0I09922g	GNT1	YOR320C	CCGTTATACGAATATCGACC	GCGAGACCGCTTTACCAGAT	TS_7	D	8	1	TEF1P-NAT1-TEF1T (based on pJK863)	HTL	Cell wall organization
949	1104	TS404	barcode set	CAGL0I09922g	GNT1	YOR320C	CCGTTATACGAATATCGACC	GCGAGACCGCTTTACCAGAT	TS_7	D	8	2	TEF1P-NAT1-TEF1T (based on pJK863)	HTL	Cell wall organization
950	1105	TS404	barcode set	CAGL0I09922g	GNT1	YOR320C	CCGTTATACGAATATCGACC	GCGAGACCGCTTTACCAGAT	TS_7	D	8	3	TEF1P-NAT1-TEF1T (based on pJK863)	HTL	Cell wall organization
951	1106	TS405	barcode set	CAGL0H09130g	MNN4	YKL201C	CAGAGTAAGTAACGGTTCGC	GCGAGACCGCTTTACCAGAT	TS_7	D	9	1	TEF1P-NAT1-TEF1T (based on pJK863)	HTL	Cell wall organization
952	1107	TS406	barcode set	CAGL0M00528g	MNS1	YJR131W	GGCTAACCGAAACCGTGACA	GCGAGACCGCTTTACCAGAT	TS_7	D	11	1	TEF1P-NAT1-TEF1T (based on pJK863)	HTL	Cell wall organization
953	1108	TS406	barcode set	CAGL0M00528g	MNS1	YJR131W	GGCTAACCGAAACCGTGACA	GCGAGACCGCTTTACCAGAT	TS_7	D	11	2	TEF1P-NAT1-TEF1T (based on pJK863)	HTL	Cell wall organization
954	1109	TS406	barcode set	CAGL0M00528g	MNS1	YJR131W	GGCTAACCGAAACCGTGACA	GCGAGACCGCTTTACCAGAT	TS_7	D	11	3	TEF1P-NAT1-TEF1T (based on pJK863)	HTL	Cell wall organization
955	1110	TS407	barcode set	CAGL0J08778g	SEC13	YLR208W	TAGTGACTTAGACCCTCCGT	GCGAGACCGCTTTACCAGAT	TS_7	E	1	1	TEF1P-NAT1-TEF1T (based on pJK863)	HTL	Other
956	1111	TS407	barcode set	CAGL0J08778g	SEC13	YLR208W	TAGTGACTTAGACCCTCCGT	GCGAGACCGCTTTACCAGAT	TS_7	E	1	2	TEF1P-NAT1-TEF1T (based on pJK863)	HTL	Other
957	1112	TS407	barcode set	CAGL0J08778g	SEC13	YLR208W	TAGTGACTTAGACCCTCCGT	GCGAGACCGCTTTACCAGAT	TS_7	E	1	3	TEF1P-NAT1-TEF1T (based on pJK863)	HTL	Other
958	1113	TS408	barcode set	CAGL0G07887g		YGR106C	TAAGGCGTCGTCACTACGGT	GCGAGACCGCTTTACCAGAT	TS_7	E	3	1	TEF1P-NAT1-TEF1T (based on pJK863)	HTL	Vacuole, Golgi
959	1114	TS409	barcode set	CAGL0C04048g	MNT3	YIL014W	AATCGGTACTAAGTCGGTTC	GCGAGACCGCTTTACCAGAT	TS_7	E	9	1	TEF1P-NAT1-TEF1T (based on pJK863)	HTL	Cell wall organization
960	1115	TS409	barcode set	CAGL0C04048g	MNT3	YIL014W	AATCGGTACTAAGTCGGTTC	GCGAGACCGCTTTACCAGAT	TS_7	E	9	2	TEF1P-NAT1-TEF1T (based on pJK863)	HTL	Cell wall organization
961	1116	TS409	barcode set	CAGL0C04048g	MNT3	YIL014W	AATCGGTACTAAGTCGGTTC	GCGAGACCGCTTTACCAGAT	TS_7	E	9	3	TEF1P-NAT1-TEF1T (based on pJK863)	HTL	Cell wall organization
962	1117	TS410	barcode set	CAGL0L07216g	PMT1	YDL095W	CCCGATTGGTTAATACCGAT	GCGAGACCGCTTTACCAGAT	TS_7	E	10	1	TEF1P-NAT1-TEF1T (based on pJK863)	HTL	Cell wall organization
963	1118	TS410	barcode set	CAGL0L07216g	PMT1	YDL095W	CCCGATTGGTTAATACCGAT	GCGAGACCGCTTTACCAGAT	TS_7	E	10	2	TEF1P-NAT1-TEF1T (based on pJK863)	HTL	Cell wall organization
964	1119	TS410	barcode set	CAGL0L07216g	PMT1	YDL095W	CCCGATTGGTTAATACCGAT	GCGAGACCGCTTTACCAGAT	TS_7	E	10	3	TEF1P-NAT1-TEF1T (based on pJK863)	HTL	Cell wall organization
965	1120	TS411	barcode set	CAGL0J08734g	PMT2	YAL023C	GGACCGACTATTCCCTAAAT	GCGAGACCGCTTTACCAGAT	TS_7	E	11	1	TEF1P-NAT1-TEF1T (based on pJK863)	HTL	Cell wall organization
966	1121	TS411	barcode set	CAGL0J08734g	PMT2	YAL023C	GGACCGACTATTCCCTAAAT	GCGAGACCGCTTTACCAGAT	TS_7	E	11	2	TEF1P-NAT1-TEF1T (based on pJK863)	HTL	Cell wall organization
967	1122	TS411	barcode set	CAGL0J08734g	PMT2	YAL023C	GGACCGACTATTCCCTAAAT	GCGAGACCGCTTTACCAGAT	TS_7	E	11	3	TEF1P-NAT1-TEF1T (based on pJK863)	HTL	Cell wall organization
968	1123	TS412	barcode set	CAGL0M00220g	PMT4	YJR143C	GCGCTGCAATCAGAAAGGTA	GCGAGACCGCTTTACCAGAT	TS_7	E	12	1	TEF1P-NAT1-TEF1T (based on pJK863)	HTL	Cell wall organization
969	1124	TS412	barcode set	CAGL0M00220g	PMT4	YJR143C	GCGCTGCAATCAGAAAGGTA	GCGAGACCGCTTTACCAGAT	TS_7	E	12	2	TEF1P-NAT1-TEF1T (based on pJK863)	HTL	Cell wall organization
970	1125	TS412	barcode set	CAGL0M00220g	PMT4	YJR143C	GCGCTGCAATCAGAAAGGTA	GCGAGACCGCTTTACCAGAT	TS_7	E	12	3	TEF1P-NAT1-TEF1T (based on pJK863)	HTL	Cell wall organization
971	1126	TS413	barcode set	CAGL0M07656g	ERG5	YMR015C	TGGATTCGACTCGCTCGCAT	GCGAGACCGCTTTACCAGAT	TS_7	F	6	1	TEF1P-NAT1-TEF1T (based on pJK863)	HTL	Membrane biogenesis
972	1127	TS413	barcode set	CAGL0M07656g	ERG5	YMR015C	TGGATTCGACTCGCTCGCAT	GCGAGACCGCTTTACCAGAT	TS_7	F	6	2	TEF1P-NAT1-TEF1T (based on pJK863)	HTL	Membrane biogenesis
973	1128	TS413	barcode set	CAGL0M07656g	ERG5	YMR015C	TGGATTCGACTCGCTCGCAT	GCGAGACCGCTTTACCAGAT	TS_7	F	6	3	TEF1P-NAT1-TEF1T (based on pJK863)	HTL	Membrane biogenesis
974	1129	TS414	barcode set	CAGL0G09515g	EXG1	YLR300W	GCGGCGGATATGCTATAAAT	GCGAGACCGCTTTACCAGAT	TS_7	F	9	1	TEF1P-NAT1-TEF1T (based on pJK863)	HTL	Cell wall organization
975	1130	TS415	barcode set	CAGL0K12738g	FET5	YFL041W	GCCCAAATAAGACGTGAGCC	GCGAGACCGCTTTACCAGAT	TS_7	G	4	1	TEF1P-NAT1-TEF1T (based on pJK863)	HTL	Vacuole, Golgi
976	1131	TS415	barcode set	CAGL0K12738g	FET5	YFL041W	GCCCAAATAAGACGTGAGCC	GCGAGACCGCTTTACCAGAT	TS_7	G	4	2	TEF1P-NAT1-TEF1T (based on pJK863)	HTL	Vacuole, Golgi
977	1132	TS416	barcode set	CAGL0C03333g	FRE6	YLL051C	TAAGAATCGTTAGCAAGGCC	GCGAGACCGCTTTACCAGAT	TS_7	G	5	1	TEF1P-NAT1-TEF1T (based on pJK863)	HTL	Transport
978	1133	TS416	barcode set	CAGL0C03333g	FRE6	YLL051C	TAAGAATCGTTAGCAAGGCC	GCGAGACCGCTTTACCAGAT	TS_7	G	5	2	TEF1P-NAT1-TEF1T (based on pJK863)	HTL	Transport
979	1134	TS417	barcode set	CAGL0M07942g		YLR047C	AGAGATTCGCTTAACGCCCG	GCGAGACCGCTTTACCAGAT	TS_7	G	6	1	TEF1P-NAT1-TEF1T (based on pJK863)	HTL	Other
980	1135	TS417	barcode set	CAGL0M07942g		YLR047C	AGAGATTCGCTTAACGCCCG	GCGAGACCGCTTTACCAGAT	TS_7	G	6	2	TEF1P-NAT1-TEF1T (based on pJK863)	HTL	Other
981	1136	TS417	barcode set	CAGL0M07942g		YLR047C	AGAGATTCGCTTAACGCCCG	GCGAGACCGCTTTACCAGAT	TS_7	G	6	3	TEF1P-NAT1-TEF1T (based on pJK863)	HTL	Other
982	1137	TS418	barcode set	CAGL0M07942g		YLR047C	TTCACCGAGACAAGGCGAGA	GCGAGACCGCTTTACCAGAT	TS_7	G	9	1	TEF1P-NAT1-TEF1T (based on pJK863)	HTL	Other
983	1138	TS418	barcode set	CAGL0M07942g		YLR047C	TTCACCGAGACAAGGCGAGA	GCGAGACCGCTTTACCAGAT	TS_7	G	9	2	TEF1P-NAT1-TEF1T (based on pJK863)	HTL	Other
984	1139	TS419	barcode set	CAGL0L10868g		YOR271C	TCCATACCGATAAAGCTCGA	GCGAGACCGCTTTACCAGAT	TS_7	G	10	1	TEF1P-NAT1-TEF1T (based on pJK863)	HTL	Other
985	1140	TS419	barcode set	CAGL0L10868g		YOR271C	TCCATACCGATAAAGCTCGA	GCGAGACCGCTTTACCAGAT	TS_7	G	10	2	TEF1P-NAT1-TEF1T (based on pJK863)	HTL	Other
986	1141	TS420	barcode set	CAGL0M05511g	FTH1	YBR207W	TACTGACGCGGGACTGACTT	GCGAGACCGCTTTACCAGAT	TS_7	G	11	1	TEF1P-NAT1-TEF1T (based on pJK863)	HTL	Vacuole, Golgi
987	1142	TS420	barcode set	CAGL0M05511g	FTH1	YBR207W	TACTGACGCGGGACTGACTT	GCGAGACCGCTTTACCAGAT	TS_7	G	11	2	TEF1P-NAT1-TEF1T (based on pJK863)	HTL	Vacuole, Golgi
988	1143	TS421	barcode set	CAGL0D01496g	ISA2	YPR067W	ACGGACACGACAGTAGTTCC	GCGAGACCGCTTTACCAGAT	TS_7	H	2	1	TEF1P-NAT1-TEF1T (based on pJK863)	HTL	Other
989	1144	TS421	barcode set	CAGL0D01496g	ISA2	YPR067W	ACGGACACGACAGTAGTTCC	GCGAGACCGCTTTACCAGAT	TS_7	H	2	2	TEF1P-NAT1-TEF1T (based on pJK863)	HTL	Other
990	1145	TS421	barcode set	CAGL0D01496g	ISA2	YPR067W	ACGGACACGACAGTAGTTCC	GCGAGACCGCTTTACCAGAT	TS_7	H	2	3	TEF1P-NAT1-TEF1T (based on pJK863)	HTL	Other
991	1146	TS422	barcode set	CAGL0E06006g	MMT2	YPL224C	AAGCCAAACGAACTTGCGGC	GCGAGACCGCTTTACCAGAT	TS_7	H	4	1	TEF1P-NAT1-TEF1T (based on pJK863)	HTL	Other
992	1147	TS422	barcode set	CAGL0E06006g	MMT2	YPL224C	AAGCCAAACGAACTTGCGGC	GCGAGACCGCTTTACCAGAT	TS_7	H	4	2	TEF1P-NAT1-TEF1T (based on pJK863)	HTL	Other
993	1148	TS422	barcode set	CAGL0E06006g	MMT2	YPL224C	AAGCCAAACGAACTTGCGGC	GCGAGACCGCTTTACCAGAT	TS_7	H	4	3	TEF1P-NAT1-TEF1T (based on pJK863)	HTL	Other
994	1149	TS423	barcode set	CAGL0A03476g	SMF3	YLR034C	ACACCGTATTTAAGACTGCG	GCGAGACCGCTTTACCAGAT	TS_7	H	9	1	TEF1P-NAT1-TEF1T (based on pJK863)	HTL	Vacuole, Golgi
995	1150	TS423	barcode set	CAGL0A03476g	SMF3	YLR034C	ACACCGTATTTAAGACTGCG	GCGAGACCGCTTTACCAGAT	TS_7	H	9	2	TEF1P-NAT1-TEF1T (based on pJK863)	HTL	Vacuole, Golgi
996	1151	TS423	barcode set	CAGL0A03476g	SMF3	YLR034C	ACACCGTATTTAAGACTGCG	GCGAGACCGCTTTACCAGAT	TS_7	H	9	3	TEF1P-NAT1-TEF1T (based on pJK863)	HTL	Vacuole, Golgi
997	1152	TS424	barcode set	CAGL0J08481g		YDR506C	ATCTCGCGTGACGATAGGCT	GCGAGACCGCTTTACCAGAT	TS_7	H	10	1	TEF1P-NAT1-TEF1T (based on pJK863)	HTL	Vacuole, Golgi
998	1153	TS424	barcode set	CAGL0J08481g		YDR506C	ATCTCGCGTGACGATAGGCT	GCGAGACCGCTTTACCAGAT	TS_7	H	10	2	TEF1P-NAT1-TEF1T (based on pJK863)	HTL	Vacuole, Golgi
999	1154	TS424	barcode set	CAGL0J08481g		YDR506C	ATCTCGCGTGACGATAGGCT	GCGAGACCGCTTTACCAGAT	TS_7	H	10	3	TEF1P-NAT1-TEF1T (based on pJK863)	HTL	Vacuole, Golgi
1000	1155	TS425	barcode set	CAGL0M05643g	YFH1	YDL120W	GATGCGGCACTATCGCTCAT	GCGAGACCGCTTTACCAGAT	TS_7	H	11	1	TEF1P-NAT1-TEF1T (based on pJK863)	HTL	Cell wall organization
1001	1156	TS425	barcode set	CAGL0M05643g	YFH1	YDL120W	GATGCGGCACTATCGCTCAT	GCGAGACCGCTTTACCAGAT	TS_7	H	11	2	TEF1P-NAT1-TEF1T (based on pJK863)	HTL	Cell wall organization
1002	1157	TS426	barcode set	CAGL0L04576g	YRR1	YOR162C	AGGAGCTTGTCTAATATCGG	GCGAGACCGCTTTACCAGAT	TS_7	H	12	1	TEF1P-NAT1-TEF1T (based on pJK863)	HTL	Transcriptional regulation
1003	1158	TS426	barcode set	CAGL0L04576g	YRR1	YOR162C	AGGAGCTTGTCTAATATCGG	GCGAGACCGCTTTACCAGAT	TS_7	H	12	2	TEF1P-NAT1-TEF1T (based on pJK863)	HTL	Transcriptional regulation
1004	1159	TS426	barcode set	CAGL0L04576g	YRR1	YOR162C	AGGAGCTTGTCTAATATCGG	GCGAGACCGCTTTACCAGAT	TS_7	H	12	3	TEF1P-NAT1-TEF1T (based on pJK863)	HTL	Transcriptional regulation
1005	1160	TS427	barcode set	CAGL0G09042g	AFT2	YPL202C	GGGCTACCTCTCAATTATAC	GCGAGACCGCTTTACCAGAT	TS_7	F	12	1	TEF1P-NAT1-TEF1T (based on pJK863)	HTL	Transcriptional regulation
1006	1161	TS427	barcode set	CAGL0G09042g	AFT2	YPL202C	GGGCTACCTCTCAATTATAC	GCGAGACCGCTTTACCAGAT	TS_7	F	12	2	TEF1P-NAT1-TEF1T (based on pJK863)	HTL	Transcriptional regulation
1007	1162	TS427	barcode set	CAGL0G09042g	AFT2	YPL202C	GGGCTACCTCTCAATTATAC	GCGAGACCGCTTTACCAGAT	TS_7	F	12	3	TEF1P-NAT1-TEF1T (based on pJK863)	HTL	Transcriptional regulation
1008	1172	TS431	barcode set	CAGL0E06600g	FLO5	YHR211W	CGCGCAGAGGTTAGATAAAT	GCGAGACCGCTTTACCAGAT	TS_8	C	1	1	TEF1P-NAT1-TEF1T (based on pJK863)	HTL	Cell wall organization
1009	1173	TS432	barcode set	CAGL0E06644g	MUC1	YIR019C	CGACCCTGATGATCCTTTAT	GCGAGACCGCTTTACCAGAT	TS_8	C	2	1	TEF1P-NAT1-TEF1T (based on pJK863)	HTL	Cell wall organization
1010	1174	TS432	barcode set	CAGL0E06644g	MUC1	YIR019C	CGACCCTGATGATCCTTTAT	GCGAGACCGCTTTACCAGAT	TS_8	C	2	2	TEF1P-NAT1-TEF1T (based on pJK863)	HTL	Cell wall organization
1011	1175	TS432	barcode set	CAGL0E06644g	MUC1	YIR019C	CGACCCTGATGATCCTTTAT	GCGAGACCGCTTTACCAGAT	TS_8	C	2	3	TEF1P-NAT1-TEF1T (based on pJK863)	HTL	Cell wall organization
1012	1176	TS433	barcode set	CAGL0L12980g	SET1	YHR119W	GTGCGAACCAACGTACTACA	GCGAGACCGCTTTACCAGAT	TS_8	C	5	1	TEF1P-NAT1-TEF1T (based on pJK863)	HTL	Chromatin
1013	1177	TS434	barcode set	CAGL0C00297g	SET2	YJL168C	GCTAATCGCTAATTCGTTCC	GCGAGACCGCTTTACCAGAT	TS_8	C	7	1	TEF1P-NAT1-TEF1T (based on pJK863)	HTL	Chromatin
1014	1178	TS434	barcode set	CAGL0C00297g	SET2	YJL168C	GCTAATCGCTAATTCGTTCC	GCGAGACCGCTTTACCAGAT	TS_8	C	7	2	TEF1P-NAT1-TEF1T (based on pJK863)	HTL	Chromatin
1015	1179	TS435	barcode set	CAGL0L03091g	SET3	YKR029C	GCATTAACGGGAACTAGAGC	GCGAGACCGCTTTACCAGAT	TS_8	C	8	1	TEF1P-NAT1-TEF1T (based on pJK863)	HTL	Chromatin
1016	1180	TS435	barcode set	CAGL0L03091g	SET3	YKR029C	GCATTAACGGGAACTAGAGC	GCGAGACCGCTTTACCAGAT	TS_8	C	8	2	TEF1P-NAT1-TEF1T (based on pJK863)	HTL	Chromatin
1017	1181	TS436	barcode set	CAGL0G06556g	PHO23	YNL097C	GATTATACGCTATCCGAGGT	GCGAGACCGCTTTACCAGAT	TS_8	C	10	1	TEF1P-NAT1-TEF1T (based on pJK863)	HTL	Chromatin
1018	1182	TS437	barcode set	CAGL0C05357g	SIR2	YDL042C	ATTACGAGGTACGCGCTTCG	GCGAGACCGCTTTACCAGAT	TS_8	D	2	1	TEF1P-NAT1-TEF1T (based on pJK863)	HTL	Chromatin
1019	1183	TS437	barcode set	CAGL0C05357g	SIR2	YDL042C	ATTACGAGGTACGCGCTTCG	GCGAGACCGCTTTACCAGAT	TS_8	D	2	2	TEF1P-NAT1-TEF1T (based on pJK863)	HTL	Chromatin
1020	1184	TS438	barcode set	CAGL0K01463g	SIR2	YDL042C	ATTACCTAGTCGGAGACAGG	GCGAGACCGCTTTACCAGAT	TS_8	D	3	1	TEF1P-NAT1-TEF1T (based on pJK863)	HTL	Chromatin
1021	1185	TS438	barcode set	CAGL0K01463g	SIR2	YDL042C	ATTACCTAGTCGGAGACAGG	GCGAGACCGCTTTACCAGAT	TS_8	D	3	2	TEF1P-NAT1-TEF1T (based on pJK863)	HTL	Chromatin
1022	1186	TS438	barcode set	CAGL0K01463g	SIR2	YDL042C	ATTACCTAGTCGGAGACAGG	GCGAGACCGCTTTACCAGAT	TS_8	D	3	3	TEF1P-NAT1-TEF1T (based on pJK863)	HTL	Chromatin
1023	1187	TS439	barcode set	CAGL0M00770g	SIR3	YLR442C	ATTAGCGTCTCGACTACCTT	GCGAGACCGCTTTACCAGAT	TS_8	D	4	1	TEF1P-NAT1-TEF1T (based on pJK863)	HTL	Chromatin
1024	1188	TS440	barcode set	CAGL0F02607g	DIT2	YDR402C	TATTAGTGCGGACCCGGCTT	GCGAGACCGCTTTACCAGAT	TS_8	E	5	1	TEF1P-NAT1-TEF1T (based on pJK863)	HTL	Cell wall organization
1025	1189	TS441	barcode set	CAGL0L09933g	CUE5	YOR042W	TTCTACCGTCGGAGGCAGTT	GCGAGACCGCTTTACCAGAT	TS_8	E	6	1	TEF1P-NAT1-TEF1T (based on pJK863)	HTL	Other
1026	1190	TS442	barcode set	CAGL0E03454g	IMH1	YLR309C	AATCGGTACTAAGTCGGTTC	GCGAGACCGCTTTACCAGAT	TS_8	E	9	1	TEF1P-NAT1-TEF1T (based on pJK863)	HTL	Other
1027	1191	TS442	barcode set	CAGL0E03454g	IMH1	YLR309C	AATCGGTACTAAGTCGGTTC	GCGAGACCGCTTTACCAGAT	TS_8	E	9	2	TEF1P-NAT1-TEF1T (based on pJK863)	HTL	Other
1028	1192	TS442	barcode set	CAGL0E03454g	IMH1	YLR309C	AATCGGTACTAAGTCGGTTC	GCGAGACCGCTTTACCAGAT	TS_8	E	9	3	TEF1P-NAT1-TEF1T (based on pJK863)	HTL	Other
1029	1193	TS443	barcode set	CAGL0K08998g	OSW1	YOR255W	CCCGATTGGTTAATACCGAT	GCGAGACCGCTTTACCAGAT	TS_8	E	10	1	TEF1P-NAT1-TEF1T (based on pJK863)	HTL	Cell wall organization
1030	1194	TS443	barcode set	CAGL0K08998g	OSW1	YOR255W	CCCGATTGGTTAATACCGAT	GCGAGACCGCTTTACCAGAT	TS_8	E	10	2	TEF1P-NAT1-TEF1T (based on pJK863)	HTL	Cell wall organization
1031	1195	TS443	barcode set	CAGL0K08998g	OSW1	YOR255W	CCCGATTGGTTAATACCGAT	GCGAGACCGCTTTACCAGAT	TS_8	E	10	3	TEF1P-NAT1-TEF1T (based on pJK863)	HTL	Cell wall organization
1032	1196	TS444	barcode set	CAGL0M07183g	MDM31	YHR194W	CGACTATTGTGACATACCTG	GCGAGACCGCTTTACCAGAT	TS_8	F	5	1	TEF1P-NAT1-TEF1T (based on pJK863)	HTL	Other
1033	1197	TS445	barcode set	CAGL0B01991g	SWF1	YDR126W	TACTCGGCAACAGGTCGGTA	GCGAGACCGCTTTACCAGAT	TS_8	F	10	1	TEF1P-NAT1-TEF1T (based on pJK863)	HTL	Vacuole, Golgi
1034	1198	TS445	barcode set	CAGL0B01991g	SWF1	YDR126W	TACTCGGCAACAGGTCGGTA	GCGAGACCGCTTTACCAGAT	TS_8	F	10	2	TEF1P-NAT1-TEF1T (based on pJK863)	HTL	Vacuole, Golgi
1035	1199	TS446	barcode set	CAGL0J05874g	ASI2	YNL159C	GCCCACATGGATAACATTAC	GCGAGACCGCTTTACCAGAT	TS_8	G	1	1	TEF1P-NAT1-TEF1T (based on pJK863)	HTL	Other
1036	1200	TS446	barcode set	CAGL0J05874g	ASI2	YNL159C	GCCCACATGGATAACATTAC	GCGAGACCGCTTTACCAGAT	TS_8	G	1	2	TEF1P-NAT1-TEF1T (based on pJK863)	HTL	Other
1037	1201	TS447	barcode set	CAGL0L02827g	PTP2	YOR208W	ACGGACACGACAGTAGTTCC	GCGAGACCGCTTTACCAGAT	TS_8	H	2	1	TEF1P-NAT1-TEF1T (based on pJK863)	HTL	Signal transduction
1038	1202	TS448	barcode set	CAGL0K08426g	EMP24	YGL200C	AAGCCAAACGAACTTGCGGC	GCGAGACCGCTTTACCAGAT	TS_8	H	4	1	TEF1P-NAT1-TEF1T (based on pJK863)	HTL	Vacuole, Golgi
1039	1203	TS448	barcode set	CAGL0K08426g	EMP24	YGL200C	AAGCCAAACGAACTTGCGGC	GCGAGACCGCTTTACCAGAT	TS_8	H	4	2	TEF1P-NAT1-TEF1T (based on pJK863)	HTL	Vacuole, Golgi
1040	1204	TS448	barcode set	CAGL0K08426g	EMP24	YGL200C	AAGCCAAACGAACTTGCGGC	GCGAGACCGCTTTACCAGAT	TS_8	H	4	3	TEF1P-NAT1-TEF1T (based on pJK863)	HTL	Vacuole, Golgi
1041	1208	TS450	barcode set	CAGL0C02761g	ERP4	YOR016C	ATCTCGCGTGACGATAGGCT	GCGAGACCGCTTTACCAGAT	TS_8	H	10	1	TEF1P-NAT1-TEF1T (based on pJK863)	HTL	Vacuole, Golgi
1042	1209	TS450	barcode set	CAGL0C02761g	ERP4	YOR016C	ATCTCGCGTGACGATAGGCT	GCGAGACCGCTTTACCAGAT	TS_8	H	10	1	TEF1P-NAT1-TEF1T (based on pJK863)	HTL	Vacuole, Golgi
1043	1210	TS451	barcode set	CAGL0I01232g	ERP5	YHR110W	GATGCGGCACTATCGCTCAT	GCGAGACCGCTTTACCAGAT	TS_8	H	11	1	TEF1P-NAT1-TEF1T (based on pJK863)	HTL	Transport
1044	1211	TS451	barcode set	CAGL0I01232g	ERP5	YHR110W	GATGCGGCACTATCGCTCAT	GCGAGACCGCTTTACCAGAT	TS_8	H	11	2	TEF1P-NAT1-TEF1T (based on pJK863)	HTL	Transport
1045	1212	TS451	barcode set	CAGL0I01232g	ERP5	YHR110W	GATGCGGCACTATCGCTCAT	GCGAGACCGCTTTACCAGAT	TS_8	H	11	3	TEF1P-NAT1-TEF1T (based on pJK863)	HTL	Transport
1046	1213	TS452	barcode set	CAGL0L13244g	EMP47	YFL048C	CCGAGTTAGGAATGTTATGC	GCGAGACCGCTTTACCAGAT	TS_8	H	5	1	TEF1P-NAT1-TEF1T (based on pJK863)	HTL	Vacuole, Golgi
1047	1218	TS454	barcode set	CAGL0K02145g		YER130C	CGATTCGATAAATGACGCGA	GCGAGACCGCTTTACCAGAT	TS_6	A	2	1	TEF1P-NAT1-TEF1T (based on pJK863)	HTL	Transcriptional regulation
1048	1219	TS455	barcode set	CAGL0L08910g	AEP3	YPL005W	AGCATGTCTCTAACTGGACG	GCGAGACCGCTTTACCAGAT	TS_6	F	1	1	TEF1P-NAT1-TEF1T (based on pJK863)	HTL	Transcriptional regulation
1049	1220	TS455	barcode set	CAGL0L08910g	AEP3	YPL005W	AGCATGTCTCTAACTGGACG	GCGAGACCGCTTTACCAGAT	TS_6	F	1	2	TEF1P-NAT1-TEF1T (based on pJK863)	HTL	Transcriptional regulation
1050	1221	TS455	barcode set	CAGL0L08910g	AEP3	YPL005W	AGCATGTCTCTAACTGGACG	GCGAGACCGCTTTACCAGAT	TS_6	F	1	3	TEF1P-NAT1-TEF1T (based on pJK863)	HTL	Transcriptional regulation
1051	1222	TS455	barcode set	CAGL0F03245g	IRE1	YHR079C	CCTAGAGACGTAGATATGCG	GCGAGACCGCTTTACCAGAT	TS_6	H	8	1	TEF1P-NAT1-TEF1T (based on pJK863)	HTL	Transcriptional regulation
1052	1223	TS378	barcode set	CAGL0H06633g	PCK1	YKR097W	TACTGACGCGGGACTGACTT	GCGAGACCGCTTTACCAGAT	TS_6	G	11	2	TEF1P-NAT1-TEF1T (based on pJK863)	HTL	Other
1053	1224	TS378	barcode set	CAGL0H06633g	PCK1	YKR097W	TACTGACGCGGGACTGACTT	GCGAGACCGCTTTACCAGAT	TS_6	G	11	3	TEF1P-NAT1-TEF1T (based on pJK863)	HTL	Other
1054	1225	TS456	barcode set	CAGL0M08910g	SNF1	YDR477W	TACCTATTGACCAGTGGGCG	GCGAGACCGCTTTACCAGAT	TS_6	H	6	1	TEF1P-NAT1-TEF1T (based on pJK863)	HTL	Transcriptional regulation
1055	1226	TS332	barcode set	CAGL0M09449g	ECM21	YBL101C	CCGTTATACGAATATCGACC	GCGAGACCGCTTTACCAGAT	TS_5	D	8	3	TEF1P-NAT1-TEF1T (based on pJK863)	HTL	Cell wall organization
1056	1227	TS333	barcode set	CAGL0C01111g	PPZ1	YML016C	ATATACGTGGAATGACTGGC	GCGAGACCGCTTTACCAGAT	TS_5	F	3	3	TEF1P-NAT1-TEF1T (based on pJK863)	HTL	Other
1057	1228	TS456	barcode set	CAGL0M08910g	SNF1	YDR477W	TACCTATTGACCAGTGGGCG	GCGAGACCGCTTTACCAGAT	TS_6	H	6	2	TEF1P-NAT1-TEF1T (based on pJK863)	HTL	Transcriptional regulation
1058	1229	TS456	barcode set	CAGL0M08910g	SNF1	YDR477W	TACCTATTGACCAGTGGGCG	GCGAGACCGCTTTACCAGAT	TS_6	H	6	3	TEF1P-NAT1-TEF1T (based on pJK863)	HTL	Transcriptional regulation
1059	1230	TS457	barcode set	CAGL0I10538g	SYF2	YGR129W	GTGAGCGAAACACCGCGTAA	GCGAGACCGCTTTACCAGAT	TS_6	C	4	1	TEF1P-NAT1-TEF1T (based on pJK863)	HTL	Transcriptional regulation
1060	1231	TS458	barcode set	CAGL0M05929g	FMP18	YKR065C	GCTACAAACATAAGTGCGGC	GCGAGACCGCTTTACCAGAT	TS_9	A	3	1	TEF1P-NAT1-TEF1T (based on pJK863)	HTL	Transport
1061	1232	TS458	barcode set	CAGL0M05929g	FMP18	YKR065C	GCTACAAACATAAGTGCGGC	GCGAGACCGCTTTACCAGAT	TS_9	A	3	2	TEF1P-NAT1-TEF1T (based on pJK863)	HTL	Transport
1062	1233	TS459	barcode set	CAGL0I07491g	IZH1	YDR492W	AATGTCGCGTAATGGCTTAG	GCGAGACCGCTTTACCAGAT	TS_9	A	7	1	TEF1P-NAT1-TEF1T (based on pJK863)	HTL	Other
1063	1234	TS459	barcode set	CAGL0I07491g	IZH1	YDR492W	AATGTCGCGTAATGGCTTAG	GCGAGACCGCTTTACCAGAT	TS_9	A	7	2	TEF1P-NAT1-TEF1T (based on pJK863)	HTL	Other
1064	1235	TS460	barcode set	CAGL0D02442g	LEM3	YNL323W	AGGCAGATACGATTAGTACG	GCGAGACCGCTTTACCAGAT	TS_9	A	8	1	TEF1P-NAT1-TEF1T (based on pJK863)	HTL	Membrane biogenesis
1065	1236	TS461	barcode set	CAGL0I03872g	SNF3	YDL194W	AAGCATCGTTAAGGCTGCCG	GCGAGACCGCTTTACCAGAT	TS_9	A	9	1	TEF1P-NAT1-TEF1T (based on pJK863)	HTL	Other
1066	1237	TS462	barcode set	CAGL0G06864g	MPS3	YJL019W	AATCGACTGTAAGTATCGCG	GCGAGACCGCTTTACCAGAT	TS_9	A	11	1	TEF1P-NAT1-TEF1T (based on pJK863)	HTL	Chromatin
1067	1238	TS462	barcode set	CAGL0G06864g	MPS3	YJL019W	AATCGACTGTAAGTATCGCG	GCGAGACCGCTTTACCAGAT	TS_9	A	11	2	TEF1P-NAT1-TEF1T (based on pJK863)	HTL	Chromatin
1068	1239	TS463	barcode set	CAGL0I10494g	NCE102	YPR149W	ATCGGCCTGTAATCGGATCG	GCGAGACCGCTTTACCAGAT	TS_9	B	1	1	TEF1P-NAT1-TEF1T (based on pJK863)	HTL	Vacuole, Golgi
1069	1240	TS463	barcode set	CAGL0I10494g	NCE102	YPR149W	ATCGGCCTGTAATCGGATCG	GCGAGACCGCTTTACCAGAT	TS_9	B	1	2	TEF1P-NAT1-TEF1T (based on pJK863)	HTL	Vacuole, Golgi
1070	1241	TS463	barcode set	CAGL0I10494g	NCE102	YPR149W	ATCGGCCTGTAATCGGATCG	GCGAGACCGCTTTACCAGAT	TS_9	B	1	3	TEF1P-NAT1-TEF1T (based on pJK863)	HTL	Vacuole, Golgi
1071	1242	TS464	barcode set	CAGL0J08371g	PRM1	YNL279W	AGTAGTACAGCCCGCGTCAT	GCGAGACCGCTTTACCAGAT	TS_9	B	5	1	TEF1P-NAT1-TEF1T (based on pJK863)	HTL	Membrane biogenesis
1072	1243	TS464	barcode set	CAGL0J08371g	PRM1	YNL279W	AGTAGTACAGCCCGCGTCAT	GCGAGACCGCTTTACCAGAT	TS_9	B	5	2	TEF1P-NAT1-TEF1T (based on pJK863)	HTL	Membrane biogenesis
1073	1244	TS465	barcode set	CAGL0G04433g	PRM10	YJL108C	GCATTAACGGGAACTAGAGC	GCGAGACCGCTTTACCAGAT	TS_9	B	6	1	TEF1P-NAT1-TEF1T (based on pJK863)	HTL	Other
1074	1245	TS466	barcode set	CAGL0L01463g		YJR054W	GCATTAACGGGAACTAGAGC	GCGAGACCGCTTTACCAGAT	TS_9	B	9	1	TEF1P-NAT1-TEF1T (based on pJK863)	HTL	Other
1075	1246	TS466	barcode set	CAGL0L01463g		YJR054W	GCATTAACGGGAACTAGAGC	GCGAGACCGCTTTACCAGAT	TS_9	B	9	2	TEF1P-NAT1-TEF1T (based on pJK863)	HTL	Other
1076	1247	TS467	barcode set	CAGL0K00715g	RTA1	YGR213C	CGACCCTGATGATCCTTTAT	GCGAGACCGCTTTACCAGAT	TS_9	C	2	1	TEF1P-NAT1-TEF1T (based on pJK863)	HTL	Other
1077	1248	TS468	barcode set	CAGL0C02717g	SPO7	YAL009W	GTGCGAACCAACGTACTACA	GCGAGACCGCTTTACCAGAT	TS_9	C	5	1	TEF1P-NAT1-TEF1T (based on pJK863)	HTL	Membrane biogenesis
1078	1249	TS468	barcode set	CAGL0C02717g	SPO7	YAL009W	GTGCGAACCAACGTACTACA	GCGAGACCGCTTTACCAGAT	TS_9	C	5	2	TEF1P-NAT1-TEF1T (based on pJK863)	HTL	Membrane biogenesis
1079	1250	TS469	barcode set	CAGL0L01551g	SUR7	YML052W	GCATTAACGGGAACTAGAGC	GCGAGACCGCTTTACCAGAT	TS_9	C	8	1	TEF1P-NAT1-TEF1T (based on pJK863)	HTL	Other
1080	1251	TS470	barcode set	CAGL0G05093g		YDR061W	ATTACCTAGTCGGAGACAGG	GCGAGACCGCTTTACCAGAT	TS_9	D	3	1	TEF1P-NAT1-TEF1T (based on pJK863)	HTL	Other
1081	1252	TS471	barcode set	CAGL0G08019g		YDR090C	ATTAGCGTCTCGACTACCTT	GCGAGACCGCTTTACCAGAT	TS_9	D	4	1	TEF1P-NAT1-TEF1T (based on pJK863)	HTL	Other
1082	1253	TS471	barcode set	CAGL0G08019g		YDR090C	ATTAGCGTCTCGACTACCTT	GCGAGACCGCTTTACCAGAT	TS_9	D	4	2	TEF1P-NAT1-TEF1T (based on pJK863)	HTL	Other
1083	1254	TS471	barcode set	CAGL0G08019g		YDR090C	ATTAGCGTCTCGACTACCTT	GCGAGACCGCTTTACCAGAT	TS_9	D	4	3	TEF1P-NAT1-TEF1T (based on pJK863)	HTL	Other
1084	1255	TS472	barcode set	CAGL0F03641g		YDR438W	CAGAGTAAGTAACGGTTCGC	GCGAGACCGCTTTACCAGAT	TS_9	D	9	1	TEF1P-NAT1-TEF1T (based on pJK863)	HTL	Other
1085	1256	TS473	barcode set	CAGL0E05940g	BOP1	YPL221W	GGTGTACCTCCAACTTACTA	GCGAGACCGCTTTACCAGAT	TS_9	D	12	1	TEF1P-NAT1-TEF1T (based on pJK863)	HTL	Transport
1086	1257	TS474	barcode set	CAGL0H02519g		YMR253C	CCCGATTGGTTAATACCGAT	GCGAGACCGCTTTACCAGAT	TS_9	E	10	1	TEF1P-NAT1-TEF1T (based on pJK863)	HTL	Other
1087	1258	TS475	barcode set	CAGL0I04664g	FIG1	YBR040W	GGACCGACTATTCCCTAAAT	GCGAGACCGCTTTACCAGAT	TS_9	E	11	1	TEF1P-NAT1-TEF1T (based on pJK863)	HTL	Cell wall organization
1088	1259	TS475	barcode set	CAGL0I04664g	FIG1	YBR040W	GGACCGACTATTCCCTAAAT	GCGAGACCGCTTTACCAGAT	TS_9	E	11	2	TEF1P-NAT1-TEF1T (based on pJK863)	HTL	Cell wall organization
1089	1260	TS475	barcode set	CAGL0I04664g	FIG1	YBR040W	GGACCGACTATTCCCTAAAT	GCGAGACCGCTTTACCAGAT	TS_9	E	11	3	TEF1P-NAT1-TEF1T (based on pJK863)	HTL	Cell wall organization
1090	1261	TS476	barcode set	CAGL0L08294g	AXL2	YIL140W	ATATAGCGTGACAGAGTACG	GCGAGACCGCTTTACCAGAT	TS_9	F	2	1	TEF1P-NAT1-TEF1T (based on pJK863)	HTL	Other
1091	1262	TS477	barcode set	CAGL0I02508g	CTR2	YHR175W	ACATGGTTGAAAGCGCGTCA	GCGAGACCGCTTTACCAGAT	TS_9	F	4	1	TEF1P-NAT1-TEF1T (based on pJK863)	HTL	Transport
1092	1263	TS477	barcode set	CAGL0I02508g	CTR2	YHR175W	ACATGGTTGAAAGCGCGTCA	GCGAGACCGCTTTACCAGAT	TS_9	F	4	2	TEF1P-NAT1-TEF1T (based on pJK863)	HTL	Transport
1093	1264	TS477	barcode set	CAGL0I02508g	CTR2	YHR175W	ACATGGTTGAAAGCGCGTCA	GCGAGACCGCTTTACCAGAT	TS_9	F	4	3	TEF1P-NAT1-TEF1T (based on pJK863)	HTL	Transport
1094	1265	TS478	barcode set	CAGL0K02827g	DID4	YKL002W	CGACTATTGTGACATACCTG	GCGAGACCGCTTTACCAGAT	TS_9	F	5	1	TEF1P-NAT1-TEF1T (based on pJK863)	HTL	Vacuole, Golgi
1095	1266	TS479	barcode set	CAGL0K12914g	EMP47	YFL048C	ATTTCGGCACGCTCACGATG	GCGAGACCGCTTTACCAGAT	TS_9	F	7	1	TEF1P-NAT1-TEF1T (based on pJK863)	HTL	Vacuole, Golgi
1096	1267	TS479	barcode set	CAGL0K12914g	EMP47	YFL048C	ATTTCGGCACGCTCACGATG	GCGAGACCGCTTTACCAGAT	TS_9	F	7	2	TEF1P-NAT1-TEF1T (based on pJK863)	HTL	Vacuole, Golgi
1097	1268	TS479	barcode set	CAGL0K12914g	EMP47	YFL048C	ATTTCGGCACGCTCACGATG	GCGAGACCGCTTTACCAGAT	TS_9	F	7	3	TEF1P-NAT1-TEF1T (based on pJK863)	HTL	Vacuole, Golgi
1098	1269	TS480	barcode set	CAGL0L11308g	ERV41	YML067C	GCGGCGGATATGCTATAAAT	GCGAGACCGCTTTACCAGAT	TS_9	F	9	1	TEF1P-NAT1-TEF1T (based on pJK863)	HTL	Vacuole, Golgi
1099	1270	TS481	barcode set	CAGL0K04367g	MUP1	YGR055W	GCCCAAATAAGACGTGAGCC	GCGAGACCGCTTTACCAGAT	TS_9	G	4	1	TEF1P-NAT1-TEF1T (based on pJK863)	HTL	Transport
1100	1271	TS482	barcode set	CAGL0I01012g	PEP12	YOR036W	CATAAGCGTTGTGAATCGCG	GCGAGACCGCTTTACCAGAT	TS_9	G	7	1	TEF1P-NAT1-TEF1T (based on pJK863)	HTL	Vacuole, Golgi
1101	1272	TS482	barcode set	CAGL0I01012g	PEP12	YOR036W	CATAAGCGTTGTGAATCGCG	GCGAGACCGCTTTACCAGAT	TS_9	G	7	2	TEF1P-NAT1-TEF1T (based on pJK863)	HTL	Vacuole, Golgi
1102	1273	TS482	barcode set	CAGL0I01012g	PEP12	YOR036W	CATAAGCGTTGTGAATCGCG	GCGAGACCGCTTTACCAGAT	TS_9	G	7	3	TEF1P-NAT1-TEF1T (based on pJK863)	HTL	Vacuole, Golgi
1103	1274	TS483	barcode set	CAGL0B02475g	PHO84	YML123C	TGCGCGGTCAAACCAAGCAA	GCGAGACCGCTTTACCAGAT	TS_9	G	8	1	TEF1P-NAT1-TEF1T (based on pJK863)	HTL	Transport
1104	1275	TS483	barcode set	CAGL0B02475g	PHO84	YML123C	TGCGCGGTCAAACCAAGCAA	GCGAGACCGCTTTACCAGAT	TS_9	G	8	2	TEF1P-NAT1-TEF1T (based on pJK863)	HTL	Transport
1105	1276	TS484	barcode set	CAGL0G08624g	QDR2	YIL121W	TCCATACCGATAAAGCTCGA	GCGAGACCGCTTTACCAGAT	TS_9	G	10	1	TEF1P-NAT1-TEF1T (based on pJK863)	HTL	Transport
1106	1277	TS484	barcode set	CAGL0G08624g	QDR2	YIL121W	TCCATACCGATAAAGCTCGA	GCGAGACCGCTTTACCAGAT	TS_9	G	10	2	TEF1P-NAT1-TEF1T (based on pJK863)	HTL	Transport
1107	1278	TS485	barcode set	CAGL0K00297g	SAC1	YKL212W	TAACTGCCGCGAGTCGTCTT	GCGAGACCGCTTTACCAGAT	TS_9	G	12	1	TEF1P-NAT1-TEF1T (based on pJK863)	HTL	Signal transduction
1108	1279	TS485	barcode set	CAGL0K00297g	SAC1	YKL212W	TAACTGCCGCGAGTCGTCTT	GCGAGACCGCTTTACCAGAT	TS_9	G	12	2	TEF1P-NAT1-TEF1T (based on pJK863)	HTL	Signal transduction
1109	1280	TS485	barcode set	CAGL0K00297g	SAC1	YKL212W	TAACTGCCGCGAGTCGTCTT	GCGAGACCGCTTTACCAGAT	TS_9	G	12	3	TEF1P-NAT1-TEF1T (based on pJK863)	HTL	Signal transduction
1110	1281	TS486	barcode set	CAGL0K00649g	SOP4	YJL192C	ACGGACACGACAGTAGTTCC	GCGAGACCGCTTTACCAGAT	TS_9	H	2	1	TEF1P-NAT1-TEF1T (based on pJK863)	HTL	Vacuole, Golgi
1111	1282	TS486	barcode set	CAGL0K00649g	SOP4	YJL192C	ACGGACACGACAGTAGTTCC	GCGAGACCGCTTTACCAGAT	TS_9	H	2	2	TEF1P-NAT1-TEF1T (based on pJK863)	HTL	Vacuole, Golgi
1112	1283	TS486	barcode set	CAGL0K00649g	SOP4	YJL192C	ACGGACACGACAGTAGTTCC	GCGAGACCGCTTTACCAGAT	TS_9	H	2	3	TEF1P-NAT1-TEF1T (based on pJK863)	HTL	Vacuole, Golgi
1113	1284	TS487	barcode set	CAGL0L02651g	STE13	YOR219C	AAGCCAAACGAACTTGCGGC	GCGAGACCGCTTTACCAGAT	TS_9	H	4	1	TEF1P-NAT1-TEF1T (based on pJK863)	HTL	Other
1114	1285	TS487	barcode set	CAGL0L02651g	STE13	YOR219C	AAGCCAAACGAACTTGCGGC	GCGAGACCGCTTTACCAGAT	TS_9	H	4	2	TEF1P-NAT1-TEF1T (based on pJK863)	HTL	Other
1115	1286	TS488	barcode set	CAGL0M13321g	SVP26	YHR181W	CCGAGTTAGGAATGTTATGC	GCGAGACCGCTTTACCAGAT	TS_9	H	5	1	TEF1P-NAT1-TEF1T (based on pJK863)	HTL	Cell wall organization
1116	1287	TS488	barcode set	CAGL0M13321g	SVP26	YHR181W	CCGAGTTAGGAATGTTATGC	GCGAGACCGCTTTACCAGAT	TS_9	H	5	2	TEF1P-NAT1-TEF1T (based on pJK863)	HTL	Cell wall organization
1117	1288	TS488	barcode set	CAGL0M13321g	SVP26	YHR181W	CCGAGTTAGGAATGTTATGC	GCGAGACCGCTTTACCAGAT	TS_9	H	5	3	TEF1P-NAT1-TEF1T (based on pJK863)	HTL	Cell wall organization
1118	1289	TS489	barcode set	CAGL0D03146g	SYS1	YJL004C	TACCTATTGACCAGTGGGCG	GCGAGACCGCTTTACCAGAT	TS_9	H	6	1	TEF1P-NAT1-TEF1T (based on pJK863)	HTL	Vacuole, Golgi
1119	1290	TS489	barcode set	CAGL0D03146g	SYS1	YJL004C	TACCTATTGACCAGTGGGCG	GCGAGACCGCTTTACCAGAT	TS_9	H	6	2	TEF1P-NAT1-TEF1T (based on pJK863)	HTL	Vacuole, Golgi
1120	1291	TS489	barcode set	CAGL0D03146g	SYS1	YJL004C	TACCTATTGACCAGTGGGCG	GCGAGACCGCTTTACCAGAT	TS_9	H	6	3	TEF1P-NAT1-TEF1T (based on pJK863)	HTL	Vacuole, Golgi
1121	1292	TS490	barcode set	CAGL0K09988g	TVP23	YDR084C	ACACCGTATTTAAGACTGCG	GCGAGACCGCTTTACCAGAT	TS_9	H	9	1	TEF1P-NAT1-TEF1T (based on pJK863)	HTL	Vacuole, Golgi
1122	1293	TS490	barcode set	CAGL0K09988g	TVP23	YDR084C	ACACCGTATTTAAGACTGCG	GCGAGACCGCTTTACCAGAT	TS_9	H	9	2	TEF1P-NAT1-TEF1T (based on pJK863)	HTL	Vacuole, Golgi
1123	1294	TS490	barcode set	CAGL0K09988g	TVP23	YDR084C	ACACCGTATTTAAGACTGCG	GCGAGACCGCTTTACCAGAT	TS_9	H	9	3	TEF1P-NAT1-TEF1T (based on pJK863)	HTL	Vacuole, Golgi
1124	1295	TS491	barcode set	CAGL0E02079g	MSN1	YOL116W	ATCTCGCGTGACGATAGGCT	GCGAGACCGCTTTACCAGAT	TS_9	H	10	1	TEF1P-NAT1-TEF1T (based on pJK863)	HTL	Transcriptional regulation
1125	1296	TS491	barcode set	CAGL0E02079g	MSN1	YOL116W	ATCTCGCGTGACGATAGGCT	GCGAGACCGCTTTACCAGAT	TS_9	H	10	2	TEF1P-NAT1-TEF1T (based on pJK863)	HTL	Transcriptional regulation
1126	1297	TS491	barcode set	CAGL0E02079g	MSN1	YOL116W	ATCTCGCGTGACGATAGGCT	GCGAGACCGCTTTACCAGAT	TS_9	H	10	3	TEF1P-NAT1-TEF1T (based on pJK863)	HTL	Transcriptional regulation
1127	1298	TS492	barcode set	CAGL0M02585g	SPP1	YPL138C	AGGAGCTTGTCTAATATCGG	GCGAGACCGCTTTACCAGAT	TS_9	H	12	1	TEF1P-NAT1-TEF1T (based on pJK863)	HTL	Chromatin
1128	1299	TS493	barcode set	CAGL0I00726g		YMR148W	TATTCTCCGTGACGCGGGTT	GCGAGACCGCTTTACCAGAT	TS_9	E	8	1	TEF1P-NAT1-TEF1T (based on pJK863)	HTL	Other
1129	1300	TS476	barcode set	CAGL0L08294g	AXL2	YIL140W	ATATAGCGTGACAGAGTACG	GCGAGACCGCTTTACCAGAT	TS_9	F	2	2	TEF1P-NAT1-TEF1T (based on pJK863)	HTL	Other
1130	1301	TS494	barcode set	CAGL0K08272g	YSR3	YKR053C	AGAGATTCGCTTAACGCCCG	GCGAGACCGCTTTACCAGAT	TS_9	G	6	1	TEF1P-NAT1-TEF1T (based on pJK863)	HTL	Membrane biogenesis
1131	1302	TS483	barcode set	CAGL0B02475g	PHO84	YML123C	TGCGCGGTCAAACCAAGCAA	GCGAGACCGCTTTACCAGAT	TS_9	G	8	3	TEF1P-NAT1-TEF1T (based on pJK863)	HTL	Transport
1132	1303	TS495	barcode set	CAGL0K04279g	SCM4	YGR049W	AATCGGTACTAAGTCGGTTC	GCGAGACCGCTTTACCAGAT	TS_9	E	9	1	TEF1P-NAT1-TEF1T (based on pJK863)	HTL	Membrane biogenesis
1133	1304	TS495	barcode set	CAGL0K04279g	SCM4	YGR049W	AATCGGTACTAAGTCGGTTC	GCGAGACCGCTTTACCAGAT	TS_9	E	9	2	TEF1P-NAT1-TEF1T (based on pJK863)	HTL	Membrane biogenesis
1134	1305	TS496	barcode set	CAGL0L01485g	GSF2	YML048W	GCCCACATGGATAACATTAC	GCGAGACCGCTTTACCAGAT	TS_9	G	1	1	TEF1P-NAT1-TEF1T (based on pJK863)	HTL	Transport
1135	1306	TS383	barcode set	CAGL0K03245g		YKL105C	GCCATTCGTATAACCGTGTC	GCGAGACCGCTTTACCAGAT	TS_6	C	9	1	TEF1P-NAT1-TEF1T (based on pJK863)	HTL	Other
1136	1307	TS341	barcode set	CAGL0F00209g	SEO1	YAL067C	GCATTAACGGGAACTAGAGC	GCGAGACCGCTTTACCAGAT	TS_6	B	6	2	TEF1P-NAT1-TEF1T (based on pJK863)	HTL	Other
1137	1308	TS341	barcode set	CAGL0F00209g	SEO1	YAL067C	GCATTAACGGGAACTAGAGC	GCGAGACCGCTTTACCAGAT	TS_6	B	6	3	TEF1P-NAT1-TEF1T (based on pJK863)	HTL	Other
1138	1309	TS342	barcode set	CAGL0F03619g	NIP100	YPL174C	GCCATTCGTATAACCGTGTC	GCGAGACCGCTTTACCAGAT	TS_6	B	7	2	TEF1P-NAT1-TEF1T (based on pJK863)	HTL	Other
1139	1310	TS342	barcode set	CAGL0F03619g	NIP100	YPL174C	GCCATTCGTATAACCGTGTC	GCGAGACCGCTTTACCAGAT	TS_6	B	7	3	TEF1P-NAT1-TEF1T (based on pJK863)	HTL	Other
1140	1311	TS361	barcode set	CAGL0H03575g	SPO1	YNL012W	AATCGGTACTAAGTCGGTTC	CGGGTGTAGAAACCGACTAA	TS_6	E	9	2	TEF1P-NAT1-TEF1T (based on pJK863)	HTL	Other
1141	1312	TS369	barcode set	CAGL0I06116g	SSY5	YJL156C	GGGCTACCTCTCAATTATAC	CGCTCCTAAGACATTGTTAC	TS_6	F	12	2	TEF1P-NAT1-TEF1T (based on pJK863)	HTL	Other
1142	1313	TS369	barcode set	CAGL0I06116g	SSY5	YJL156C	GGGCTACCTCTCAATTATAC	CGCTCCTAAGACATTGTTAC	TS_6	F	12	3	TEF1P-NAT1-TEF1T (based on pJK863)	HTL	Other
1143	1314	TS497	barcode set	CAGL0D00242g	CNE1	YAL058W	CGGCCTAACTGTAATTGATC	CTCGACGCTGGACGTTATGT	TS_9	B	11	1	TEF1P-NAT1-TEF1T (based on pJK863)	HTL	Other
1144	1315	TS498	barcode set	CAGL0D01892g	AAT2	YLR027C	ATCGAACGTGTGTCAAACGC	ATAGCCGACTAACGAGCGTC	TS_10	A	4	1	TEF1P-NAT1-TEF1T (based on pJK863)	HTL	Other
1145	1316	TS499	barcode set	CAGL0K05577g	ATX2	YOR079C	AATGTCGCGTAATGGCTTAG	ACCTTATGTGTAATGAGCGG	TS_10	A	7	1	TEF1P-NAT1-TEF1T (based on pJK863)	HTL	Transport
1146	1317	TS500	barcode set	CAGL0K10846g	PCD1	YLR151C	ACAGCTATTAGGACGTGTTG	ATGACGGATGTATGACGACT	TS_10	B	4	1	TEF1P-NAT1-TEF1T (based on pJK863)	HTL	Other
1147	1318	TS501	barcode set	CAGL0F08019g	PEX21	YGR239C	CGACCCTGATGATCCTTTAT	GCCTATACCCAACTAATGGA	TS_10	C	2	1	TEF1P-NAT1-TEF1T (based on pJK863)	HTL	Other
1148	1319	TS502	barcode set	CAGL0K11209g	PEX5	YDR244W	ATTACGAGGTACGCGCTTCG	TTTGCGTACTGAGGACCGCT	TS_10	D	2	1	TEF1P-NAT1-TEF1T (based on pJK863)	HTL	Signal transduction
1149	1320	TS503	barcode set	CAGL0B04059g	TES1	YJR019C	TTACTTGCCCGAGCCGGATT	CACCCGAGTTACGATCAAAT	TS_10	E	4	1	TEF1P-NAT1-TEF1T (based on pJK863)	HTL	Other
1150	1321	TS503	barcode set	CAGL0B04059g	TES1	YJR019C	TTACTTGCCCGAGCCGGATT	CACCCGAGTTACGATCAAAT	TS_10	E	4	2	TEF1P-NAT1-TEF1T (based on pJK863)	HTL	Other
1151	1322	TS503	barcode set	CAGL0B04059g	TES1	YJR019C	TTACTTGCCCGAGCCGGATT	CACCCGAGTTACGATCAAAT	TS_10	E	4	3	TEF1P-NAT1-TEF1T (based on pJK863)	HTL	Other
1152	1323	TS504	barcode set	CAGL0L02299g	VPS1	YKR001C	TATTAGTGCGGACCCGGCTT	CGGGAGGATTTATACTCAGT	TS_10	E	5	1	TEF1P-NAT1-TEF1T (based on pJK863)	HTL	Other
1153	1324	TS504	barcode set	CAGL0L02299g	VPS1	YKR001C	TATTAGTGCGGACCCGGCTT	CGGGAGGATTTATACTCAGT	TS_10	E	5	2	TEF1P-NAT1-TEF1T (based on pJK863)	HTL	Other
1154	1325	TS504	barcode set	CAGL0L02299g	VPS1	YKR001C	TATTAGTGCGGACCCGGCTT	CGGGAGGATTTATACTCAGT	TS_10	E	5	3	TEF1P-NAT1-TEF1T (based on pJK863)	HTL	Other
1155	1326	TS505	barcode set	CAGL0K09570g	CPT1	YNL130C	ACATGGTTGAAAGCGCGTCA	TATGACTGCGGACGTTCGCT	TS_10	F	4	1	TEF1P-NAT1-TEF1T (based on pJK863)	HTL	Vacuole, Golgi
1156	1327	TS505	barcode set	CAGL0K09570g	CPT1	YNL130C	ACATGGTTGAAAGCGCGTCA	TATGACTGCGGACGTTCGCT	TS_10	F	4	2	TEF1P-NAT1-TEF1T (based on pJK863)	HTL	Vacuole, Golgi
1157	1328	TS506	barcode set	CAGL0L13068g	EPT1	YHR123W	TGGATTCGACTCGCTCGCAT	CATTACGTCAGATAGGGCTG	TS_10	F	6	1	TEF1P-NAT1-TEF1T (based on pJK863)	HTL	Vacuole, Golgi
1158	1329	TS507	barcode set	CAGL0F08723g	MUQ1	YGR007W	TAGCCAGTAACAGTAGGCCC	GGTATGACGATAACCCATCC	TS_10	G	3	1	TEF1P-NAT1-TEF1T (based on pJK863)	HTL	Membrane biogenesis
1159	1330	TS507	barcode set	CAGL0F08723g	MUQ1	YGR007W	TAGCCAGTAACAGTAGGCCC	GGTATGACGATAACCCATCC	TS_10	G	3	2	TEF1P-NAT1-TEF1T (based on pJK863)	HTL	Membrane biogenesis
1160	1331	TS508	barcode set	CAGL0J08074g	PDR17	YNL264C	TACTGACGCGGGACTGACTT	CGGAGAGACAGATTACACGC	TS_10	G	11	1	TEF1P-NAT1-TEF1T (based on pJK863)	HTL	Transport
1161	1332	TS508	barcode set	CAGL0J08074g	PDR17	YNL264C	TACTGACGCGGGACTGACTT	CGGAGAGACAGATTACACGC	TS_10	G	11	2	TEF1P-NAT1-TEF1T (based on pJK863)	HTL	Transport
1162	1333	TS508	barcode set	CAGL0J08074g	PDR17	YNL264C	TACTGACGCGGGACTGACTT	CGGAGAGACAGATTACACGC	TS_10	G	11	3	TEF1P-NAT1-TEF1T (based on pJK863)	HTL	Transport
1163	1336	TS508	barcode set	CAGL0G04851g	SUR4	YLR372W	ATTGAGCCTGACCACATGCG	TAGGTTGAGGCGATCGCGAT	TS_10	H	7	1	TEF1P-NAT1-TEF1T (based on pJK863)	HTL	Membrane biogenesis
1164	1337	TS508	barcode set	CAGL0G04851g	SUR4	YLR372W	ATTGAGCCTGACCACATGCG	TAGGTTGAGGCGATCGCGAT	TS_10	H	7	2	TEF1P-NAT1-TEF1T (based on pJK863)	HTL	Membrane biogenesis
1165	1166	TS429	barcode set	CAGL0K05709g	GIN4	YDR507C	GCTACAAACATAAGTGCGGC	GCGAGACCGCTTTACCAGAT	TS_11	A	3	1	TEF1P-NAT1-TEF1T (based on pJK863)	HTL	Other
1166	1166	TS429	barcode set	CAGL0K05709g	GIN4	YDR507C	GCTACAAACATAAGTGCGGC	GCGAGACCGCTTTACCAGAT	TS_11	A	3	1	TEF1P-NAT1-TEF1T (based on pJK863)	HTL	Other
1167	1166	TS429	barcode set	CAGL0K05709g	GIN4	YDR507C	GCTACAAACATAAGTGCGGC	GCGAGACCGCTTTACCAGAT	TS_11	A	3	1	TEF1P-NAT1-TEF1T (based on pJK863)	HTL	Other
1168		BM1	individual barcode	CAGL0A00451g	PDR1	YGL013C	CCGTTATACGAATATCGACC	CCGACCGGACTATTAGATAT	1A_BM	A	4	1	Low GC NAT	his3	Transcriptional regulation
1169		BM1	individual barcode	CAGL0A00451g	PDR1	YGL013C	CCGTTATACGAATATCGACC	CCGACCGGACTATTAGATAT	1A_BM	A	4	2	Low GC NAT	his3	Transcriptional regulation
1170		BM2	individual barcode	CAGL0A01628g	MIG1	YGL035C	CCACGAGACGTTTCTAAATC	CTTAGTGCTAGAGTTACGGT	1A_BM	A	5	1	Low GC NAT	his3	Transcriptional regulation
1171		BM2	individual barcode	CAGL0A01628g	MIG1	YGL035C	CCACGAGACGTTTCTAAATC	CTTAGTGCTAGAGTTACGGT	1A_BM	A	5	2	Low GC NAT	his3	Transcriptional regulation
1172		BM3	individual barcode	CAGL0A03322g	HOS2	YGL194C	TACTGGACGGCACGGTTTAT	AACGGTTGCTAATGTTTCCG	1A_BM	A	6	1	Low GC NAT	his3	Chromatin
1173		BM3	individual barcode	CAGL0A03322g	HOS2	YGL194C	TACTGGACGGCACGGTTTAT	AACGGTTGCTAATGTTTCCG	1A_BM	A	6	2	Low GC NAT	his3	Chromatin
1174		BM4	individual barcode	CAGL0A03696g	GAL83	YER027C	CGAGCTTACCAACTACTTGA	CAATCGCAGGTCAGATGATG	1A_BM	A	7	1	Low GC NAT	his3	Signal transduction
1175		BM4	individual barcode	CAGL0A03696g	GAL83	YER027C	CGAGCTTACCAACTACTTGA	CAATCGCAGGTCAGATGATG	1A_BM	A	7	2	Low GC NAT	his3	Signal transduction
1176		BM5	individual barcode	CAGL0A04235g	SAS3	YBL052C	AAATGCTCTTCAACTACGGC	AGTCTTGAAGTCATCGGAAG	1A_BM	A	8	1	Low GC NAT	his3	Chromatin
1177		BM5	individual barcode	CAGL0A04235g	SAS3	YBL052C	AAATGCTCTTCAACTACGGC	AGTCTTGAAGTCATCGGAAG	1A_BM	A	8	2	Low GC NAT	his3	Chromatin
1178		BM6	individual barcode	CAGL0A04455g	SEF1	YBL066C	AAGCTCGTCGAATAGTTGGC	AGATTGCCCTAACCGTGCAG	1A_BM	A	9	1	Low GC NAT	his3	Transcriptional regulation
1179		BM6	individual barcode	CAGL0A04455g	SEF1	YBL066C	AAGCTCGTCGAATAGTTGGC	AGATTGCCCTAACCGTGCAG	1A_BM	A	9	2	Low GC NAT	his3	Transcriptional regulation
1180		BM7	individual barcode	CAGL0A04785g	RTG2	YGL252C	TTCTGAGGCCGAGGTCCTTT	AATTCACACCGCCGAGGGTT	1A_BM	A	10	1	Low GC NAT	his3	Transcriptional regulation
1181		BM7	individual barcode	CAGL0A04785g	RTG2	YGL252C	TTCTGAGGCCGAGGTCCTTT	AATTCACACCGCCGAGGGTT	1A_BM	A	10	2	Low GC NAT	his3	Transcriptional regulation
1182		BM8	individual barcode	CAGL0B00462g	KAR4	YCL055W	CAGAGTCTTAAACGCCTGGA	CCACGGATAGAACTGAGGAC	1A_BM	A	11	1	Low GC NAT	his3	Transcriptional regulation
1183		BM8	individual barcode	CAGL0B00462g	KAR4	YCL055W	CAGAGTCTTAAACGCCTGGA	CCACGGATAGAACTGAGGAC	1A_BM	A	11	2	Low GC NAT	his3	Transcriptional regulation
1184		BM9	individual barcode	CAGL0B01188g	TOS4	YLR183C	AACTCTTCTAAACTGGCGGA	AAAGCACCTTGAACGGGCTC	1A_BM	A	12	1	Low GC NAT	his3	Chromatin
1185		BM9	individual barcode	CAGL0B01188g	TOS4	YLR183C	AACTCTTCTAAACTGGCGGA	AAAGCACCTTGAACGGGCTC	1A_BM	A	12	2	Low GC NAT	his3	Chromatin
1186		BM10	individual barcode	CAGL0B01441g	RPD3	YNL330C	ATTGCATTCGCACTTCCGAT	TATGATCGGACACCACGCAG	1A_BM	B	1	1	Low GC NAT	his3	Chromatin
1187		BM10	individual barcode	CAGL0B01441g	RPD3	YNL330C	ATTGCATTCGCACTTCCGAT	TATGATCGGACACCACGCAG	1A_BM	B	1	2	Low GC NAT	his3	Chromatin
1188		BM11	individual barcode	CAGL0B01947g	INO2	YDR123C	GAACAACCAAGACGTGTGTC	GACTCCGTACTCACTAGGAT	1A_BM	B	2	1	Low GC NAT	his3	Transcriptional regulation
1189		BM11	individual barcode	CAGL0B01947g	INO2	YDR123C	GAACAACCAAGACGTGTGTC	GACTCCGTACTCACTAGGAT	1A_BM	B	2	2	Low GC NAT	his3	Transcriptional regulation
1190		BM12	individual barcode	CAGL0B02651g	MET32	YDR253C	TTGTACCCACTAGACGTGCG	TTGAGTGTCCGGCATACCCT	1A_BM	B	3	1	Low GC NAT	his3	Transcriptional regulation
1191		BM12	individual barcode	CAGL0B02651g	MET32	YDR253C	TTGTACCCACTAGACGTGCG	TTGAGTGTCCGGCATACCCT	1A_BM	B	3	2	Low GC NAT	his3	Transcriptional regulation
1192		BM13	individual barcode	CAGL0B03421g	HAP1	YLR256W	CGAGCTGTATAAGTTACCAG	CGACCTTGACCCAGTAGATG	1A_BM	B	4	1	Low GC NAT	his3	Transcriptional regulation
1193		BM13	individual barcode	CAGL0B03421g	HAP1	YLR256W	CGAGCTGTATAAGTTACCAG	CGACCTTGACCCAGTAGATG	1A_BM	B	4	2	Low GC NAT	his3	Transcriptional regulation
1194		BM14	individual barcode	CAGL0B03575g	HAT2	YEL056W	GCGCATCACTAAGTTTCATC	ATCGCGCAGGTCGGACATAT	1A_BM	B	5	1	Low GC NAT	his3	Chromatin
1195		BM14	individual barcode	CAGL0B03575g	HAT2	YEL056W	GCGCATCACTAAGTTTCATC	ATCGCGCAGGTCGGACATAT	1A_BM	B	5	2	Low GC NAT	his3	Chromatin
1196		BM15	individual barcode	CAGL0B04895g	RFX1	YLR176C	AATATGCGGAAACCGGGTCA	ATAGTTGGACCACCGTACTC	1A_BM	B	6	1	Low GC NAT	his3	Transcriptional regulation
1197		BM15	individual barcode	CAGL0B04895g	RFX1	YLR176C	AATATGCGGAAACCGGGTCA	ATAGTTGGACCACCGTACTC	1A_BM	B	6	2	Low GC NAT	his3	Transcriptional regulation
1198		BM16	individual barcode	CAGL0C00297g	EZL1	YJL168C	TATCTGAGCCCAGTGTGCAG	ATAGTGCAGGAACGCTCAGC	1A_BM	B	7	1	Low GC NAT	his3	Chromatin
1199		BM16	individual barcode	CAGL0C00297g	EZL1	YJL168C	TATCTGAGCCCAGTGTGCAG	ATAGTGCAGGAACGCTCAGC	1A_BM	B	7	2	Low GC NAT	his3	Chromatin
1200		BM17	individual barcode	CAGL0C01485g	CTI6	YPL181W	GAATCCATGCCAACCATTGA	CACGGATTGTTAATGAGCTG	1A_BM	B	8	1	Low GC NAT	his3	Chromatin
1201		BM17	individual barcode	CAGL0C01485g	CTI6	YPL181W	GAATCCATGCCAACCATTGA	CACGGATTGTTAATGAGCTG	1A_BM	B	8	2	Low GC NAT	his3	Chromatin
1202		BM18	individual barcode	CAGL0C01551g	CUP9	YPL177C	CATAGCGGAACATAGCCTTA	CAGCCGAGAGTGTGATACAT	1A_BM	B	9	1	Low GC NAT	his3	Transcriptional regulation
1203		BM18	individual barcode	CAGL0C01551g	CUP9	YPL177C	CATAGCGGAACATAGCCTTA	CAGCCGAGAGTGTGATACAT	1A_BM	B	9	2	Low GC NAT	his3	Transcriptional regulation
1204		BM19	individual barcode	CAGL0C02277g	GLN3	YER040W	CACGATTGTGTAAGAGTCTG	AAGAGTGGATCAACTGGCAC	1A_BM	B	10	1	Low GC NAT	his3	Transcriptional regulation
1205		BM19	individual barcode	CAGL0C02277g	GLN3	YER040W	CACGATTGTGTAAGAGTCTG	AAGAGTGGATCAACTGGCAC	1A_BM	B	10	2	Low GC NAT	his3	Transcriptional regulation
1206		BM20	individual barcode	CAGL0C02519g	MIG3	YER028C	AGCATGTGGCATAACCTTTC	CCGTTAGGCAAACATGAGCA	1A_BM	B	11	1	Low GC NAT	his3	Transcriptional regulation
1207		BM20	individual barcode	CAGL0C02519g	MIG3	YER028C	AGCATGTGGCATAACCTTTC	CCGTTAGGCAAACATGAGCA	1A_BM	B	11	2	Low GC NAT	his3	Transcriptional regulation
1208		BM21	individual barcode	CAGL0C03399g	POP2	YNR052C	GCAGTCACGTTCTCGAATCG	CAGACTCAGGTAGCATGTCG	1A_BM	B	12	1	Low GC NAT	his3	Transcriptional regulation
1209		BM21	individual barcode	CAGL0C03399g	POP2	YNR052C	GCAGTCACGTTCTCGAATCG	CAGACTCAGGTAGCATGTCG	1A_BM	B	12	2	Low GC NAT	his3	Transcriptional regulation
1210		BM22	individual barcode	CAGL0C03608g	TUP1-like (not ortholog)	YCR084C	TGGGCCACAGAAGCAACTCA	ATCTGGCGACGCTATGACGT	1A_BM	C	1	1	Low GC NAT	his3	Transcriptional regulation
1211		BM22	individual barcode	CAGL0C03608g	TUP1-like (not ortholog)	YCR084C	TGGGCCACAGAAGCAACTCA	ATCTGGCGACGCTATGACGT	1A_BM	C	1	2	Low GC NAT	his3	Transcriptional regulation
1212		BM23	individual barcode	CAGL0C05335g	RTG1	YOL067C	ACGCAGTAGCGACGATTATG	AATATGAGATGGAGCCACTG	1A_BM	C	2	1	Low GC NAT	his3	Transcriptional regulation
1213		BM23	individual barcode	CAGL0C05335g	RTG1	YOL067C	ACGCAGTAGCGACGATTATG	AATATGAGATGGAGCCACTG	1A_BM	C	2	2	Low GC NAT	his3	Transcriptional regulation
1214		BM24	individual barcode	CAGL0C05357g	HST1	YOL068C	CTTCGAGCGAGAGTATTATG	ATTGTCACGCGAGTCCACTG	1A_BM	C	3	1	Low GC NAT	his3	Chromatin
1215		BM24	individual barcode	CAGL0C05357g	HST1	YOL068C	CTTCGAGCGAGAGTATTATG	ATTGTCACGCGAGTCCACTG	1A_BM	C	3	2	Low GC NAT	his3	Chromatin
1216		BM25	individual barcode	CAGL0D00462g	ASH1	YKL185W	GAACCCGCGTCAATAGGTAC	GCTAACCAGAGAGACTTACC	1A_BM	C	4	1	Low GC NAT	his3	Transcriptional regulation
1217		BM25	individual barcode	CAGL0D00462g	ASH1	YKL185W	GAACCCGCGTCAATAGGTAC	GCTAACCAGAGAGACTTACC	1A_BM	C	4	2	Low GC NAT	his3	Transcriptional regulation
1218		BM26	individual barcode	CAGL0D00682g	SFP1-like (not orthologue)	YLR403W	ACGCGAGTGTTCATCCGGTT	CACGTCGTTAAAGACCTGGA	1A_BM	C	5	1	Low GC NAT	his3	Transcriptional regulation
1219		BM26	individual barcode	CAGL0D00682g	SFP1-like (not orthologue)	YLR403W	ACGCGAGTGTTCATCCGGTT	CACGTCGTTAAAGACCTGGA	1A_BM	C	5	2	Low GC NAT	his3	Transcriptional regulation
1220		BM27	individual barcode	CAGL0D01012g	MBP1	YDL056W	CCAGTTCGGGAATGTGCTTC	CCGCTATTATTACAGACTGG	1A_BM	C	6	1	Low GC NAT	his3	Transcriptional regulation
1221		BM27	individual barcode	CAGL0D01012g	MBP1	YDL056W	CCAGTTCGGGAATGTGCTTC	CCGCTATTATTACAGACTGG	1A_BM	C	6	2	Low GC NAT	his3	Transcriptional regulation
1222		BM28	individual barcode	CAGL0D01364g	SSN6	YBR112C	AGGAGGCCCTGCATTTCCAT	AGCAGGTTAGGCACTTAGCT	1A_BM	C	7	1	Low GC NAT	his3	Transcriptional regulation
1223		BM28	individual barcode	CAGL0D01364g	SSN6	YBR112C	AGGAGGCCCTGCATTTCCAT	AGCAGGTTAGGCACTTAGCT	1A_BM	C	7	2	Low GC NAT	his3	Transcriptional regulation
1224		BM29	individual barcode	CAGL0D01430g	HOS1	YPR068C	GATACCAGTCTCACAGATTC	GGATGGCTCACACTTCTTTC	1A_BM	C	8	1	Low GC NAT	his3	Chromatin
1225		BM29	individual barcode	CAGL0D01430g	HOS1	YPR068C	GATACCAGTCTCACAGATTC	GGATGGCTCACACTTCTTTC	1A_BM	C	8	2	Low GC NAT	his3	Chromatin
1226		BM30	individual barcode	CAGL0D02486g	RDS1	YCR106W	GGCAGCAGAGTTAATTCATC	AGGTCAGACAGCATTCGCTC	1A_BM	C	9	1	Low GC NAT	his3	Other
1227		BM30	individual barcode	CAGL0D02486g	RDS1	YCR106W	GGCAGCAGAGTTAATTCATC	AGGTCAGACAGCATTCGCTC	1A_BM	C	9	2	Low GC NAT	his3	Other
1228		BM31	individual barcode	CAGL0D02904g	PPR1	YLR014C	GCCAGCAGTACAAGGCATGA	TGCGGGAGCACAATACCACA	1A_BM	C	10	1	Low GC NAT	his3	Transcriptional regulation
1229		BM31	individual barcode	CAGL0D02904g	PPR1	YLR014C	GCCAGCAGTACAAGGCATGA	TGCGGGAGCACAATACCACA	1A_BM	C	10	2	Low GC NAT	his3	Transcriptional regulation
1230		BM32	individual barcode	CAGL0D02926g	BRE2	YLR015W	CGAGTCAAGACACTGCATGA	CGCGCATGGAAATTACCACA	1A_BM	C	11	1	Low GC NAT	his3	Chromatin
1231		BM32	individual barcode	CAGL0D02926g	BRE2	YLR015W	CGAGTCAAGACACTGCATGA	CGCGCATGGAAATTACCACA	1A_BM	C	11	2	Low GC NAT	his3	Chromatin
1232		BM33	individual barcode	CAGL0D05170g	PHO4	YFR034C	GGTAACAGTCGAGACATATC	AGGACCCTGTGAACTGTCTC	1A_BM	C	12	1	Low GC NAT	his3	Transcriptional regulation
1233		BM33	individual barcode	CAGL0D05170g	PHO4	YFR034C	GGTAACAGTCGAGACATATC	AGGACCCTGTGAACTGTCTC	1A_BM	C	12	2	Low GC NAT	his3	Transcriptional regulation
1234		BM34	individual barcode	CAGL0E00561g	TUP1	YCR084C	CGCATCAGTGCAATGGATTA	CACTACTGCGGATGCGATGT	1A_BM	D	1	1	Low GC NAT	his3	Chromatin
1235		BM34	individual barcode	CAGL0E00561g	TUP1	YCR084C	CGCATCAGTGCAATGGATTA	CACTACTGCGGATGCGATGT	1A_BM	D	1	2	Low GC NAT	his3	Chromatin
1236		BM35	individual barcode	CAGL0E00627g	SRB8	YCR081W	TCCATCAGAAGACAGTGTGA	CTACTGGACGTGAGCTGACT	1A_BM	D	2	1	Low GC NAT	his3	Transcriptional regulation
1237		BM35	individual barcode	CAGL0E00627g	SRB8	YCR081W	TCCATCAGAAGACAGTGTGA	CTACTGGACGTGAGCTGACT	1A_BM	D	2	2	Low GC NAT	his3	Transcriptional regulation
1238		BM36	individual barcode	CAGL0E00693g	NGG1	YDR176W	GATTATACGCTATCCGAGGT	TAAGGTGCGGCAACGTCTAC	1A_BM	D	3	1	Low GC NAT	his3	Chromatin
1239		BM36	individual barcode	CAGL0E00693g	NGG1	YDR176W	GATTATACGCTATCCGAGGT	TAAGGTGCGGCAACGTCTAC	1A_BM	D	3	2	Low GC NAT	his3	Chromatin
1240		BM37	individual barcode	CAGL0E01331g	SWI5	YDR146C	GCGGTCGATACATTTCTAAG	GAGCGACTCCGATTCGTACT	1A_BM	D	4	1	Low GC NAT	his3	Transcriptional regulation
1241		BM37	individual barcode	CAGL0E01331g	SWI5	YDR146C	GCGGTCGATACATTTCTAAG	GAGCGACTCCGATTCGTACT	1A_BM	D	4	2	Low GC NAT	his3	Transcriptional regulation
1242		BM38	individual barcode	CAGL0E02079g	MSN1	YOL116W	TATTCGATCTCCAGCGAGGG	AGACTACCTCAACCTTATGG	1A_BM	D	5	1	Low GC NAT	his3	Transcriptional regulation
1243		BM38	individual barcode	CAGL0E02079g	MSN1	YOL116W	TATTCGATCTCCAGCGAGGG	AGACTACCTCAACCTTATGG	1A_BM	D	5	2	Low GC NAT	his3	Transcriptional regulation
1244		BM39	individual barcode	CAGL0E02475g	SIN3	YOL004W	ATACTCTGCGAAGCGGTAGC	GAGCATACACCAGTCTTAGC	1A_BM	D	6	1	Low GC NAT	his3	Chromatin
1245		BM39	individual barcode	CAGL0E02475g	SIN3	YOL004W	ATACTCTGCGAAGCGGTAGC	GAGCATACACCAGTCTTAGC	1A_BM	D	6	2	Low GC NAT	his3	Chromatin
1246		BM40	individual barcode	CAGL0E02805g	HIR1	YBL008W	ACACCACATGAAGGGATTCC	AGACTTAGTGAACGTCGCTC	1A_BM	D	7	1	Low GC NAT	his3	Transcriptional regulation
1247		BM40	individual barcode	CAGL0E02805g	HIR1	YBL008W	ACACCACATGAAGGGATTCC	AGACTTAGTGAACGTCGCTC	1A_BM	D	7	2	Low GC NAT	his3	Transcriptional regulation
1248		BM41	individual barcode	CAGL0E03718g	SNF6	YHL025W	TATCGACCTCAGAGTGCGTG	CGGCACAGTATATCAATCAC	1A_BM	D	8	1	Low GC NAT	his3	Chromatin
1249		BM41	individual barcode	CAGL0E03718g	SNF6	YHL025W	TATCGACCTCAGAGTGCGTG	CGGCACAGTATATCAATCAC	1A_BM	D	8	2	Low GC NAT	his3	Chromatin
1250		BM42	individual barcode	CAGL0E03762g	RIM101	YHL027W	TCACTTGCTCAGATGGCGTG	GCATTAGCTCAACTTTGCAC	1A_BM	D	9	1	Low GC NAT	his3	Transcriptional regulation
1251		BM42	individual barcode	CAGL0E03762g	RIM101	YHL027W	TCACTTGCTCAGATGGCGTG	GCATTAGCTCAACTTTGCAC	1A_BM	D	9	2	Low GC NAT	his3	Transcriptional regulation
1252		BM43	individual barcode	CAGL0E04312g	STP2	YHR006w	GCCATTATAGCAATCTGCAC	TCCGGTCGCATAGGCTAGAT	1A_BM	D	10	1	Low GC NAT	his3	Transcriptional regulation
1253		BM43	individual barcode	CAGL0E04312g	STP2	YHR006w	GCCATTATAGCAATCTGCAC	TCCGGTCGCATAGGCTAGAT	1A_BM	D	10	2	Low GC NAT	his3	Transcriptional regulation
1254		BM44	individual barcode	CAGL0E04488g	AHC1	YOR023C	ATGTACCACTACGCGCTGAG	ATCACTATGGAAGCGGACGC	1A_BM	D	11	1	Low GC NAT	his3	Chromatin
1255		BM44	individual barcode	CAGL0E04488g	AHC1	YOR023C	ATGTACCACTACGCGCTGAG	ATCACTATGGAAGCGGACGC	1A_BM	D	11	2	Low GC NAT	his3	Chromatin
1256		BM45	individual barcode	CAGL0E04884g	ADR1	YDR216W	GGATCGCTTAGAGCCTATTT	TCCACGCAGAGGAGTTAAAG	1A_BM	D	12	1	Low GC NAT	his3	Transcriptional regulation
1257		BM45	individual barcode	CAGL0E04884g	ADR1	YDR216W	GGATCGCTTAGAGCCTATTT	TCCACGCAGAGGAGTTAAAG	1A_BM	D	12	2	Low GC NAT	his3	Transcriptional regulation
1258		BM46	individual barcode	CAGL0E05566g	TYE7	YOR344C	ACACTGGAGGAATGCCTAGC	CATAATGGCGAATTGGCGTA	1A_BM	E	1	1	Low GC NAT	his3	Transcriptional regulation
1259		BM46	individual barcode	CAGL0E05566g	TYE7	YOR344C	ACACTGGAGGAATGCCTAGC	CATAATGGCGAATTGGCGTA	1A_BM	E	1	2	Low GC NAT	his3	Transcriptional regulation
1260		BM47	individual barcode	CAGL0F00803g	GAL11	YOL051W	GACTGCATCTCAAGTGTTAC	GAGAGAGAGACATCCTCACC	1A_BM	E	2	1	Low GC NAT	his3	Transcriptional regulation
1261		BM47	individual barcode	CAGL0F00803g	GAL11	YOL051W	GACTGCATCTCAAGTGTTAC	GAGAGAGAGACATCCTCACC	1A_BM	E	2	2	Low GC NAT	his3	Transcriptional regulation
1262		BM48	individual barcode	CAGL0F01265g	YAP7	YOL028C	ATTGCCGCGTGCATGGCTAT	CGCGCTCAGTGCATTTCTAT	1A_BM	E	3	1	Low GC NAT	his3	Transcriptional regulation
1263		BM48	individual barcode	CAGL0F01265g	YAP7	YOL028C	ATTGCCGCGTGCATGGCTAT	CGCGCTCAGTGCATTTCTAT	1A_BM	E	3	2	Low GC NAT	his3	Transcriptional regulation
1264		BM49	individual barcode	CAGL0F01837g	SPT8	YLR055C	TGCGCGGTCAAACCAAGCAA	TGGGAGTACACACACCAGAC	1A_BM	E	4	1	Low GC NAT	his3	Transcriptional regulation
1265		BM49	individual barcode	CAGL0F01837g	SPT8	YLR055C	TGCGCGGTCAAACCAAGCAA	TGGGAGTACACACACCAGAC	1A_BM	E	4	2	Low GC NAT	his3	Transcriptional regulation
1266		BM50	individual barcode	CAGL0F03025g	ARO80	YDR421W	AGGGTTATTCCACTCTCCTG	ATTATCCTTAGGCGCGGCGT	1A_BM	E	5	1	Low GC NAT	his3	Transcriptional regulation
1267		BM50	individual barcode	CAGL0F03025g	ARO80	YDR421W	AGGGTTATTCCACTCTCCTG	ATTATCCTTAGGCGCGGCGT	1A_BM	E	5	2	Low GC NAT	his3	Transcriptional regulation
1268		BM51	individual barcode	CAGL0F03047g	SIP1	YDR422C	ATTACCTGTCCACGGGAGTG	AATTCGTATGCACCGGGCGT	1A_BM	E	6	1	Low GC NAT	his3	Signal transduction
1269		BM51	individual barcode	CAGL0F03047g	SIP1	YDR422C	ATTACCTGTCCACGGGAGTG	AATTCGTATGCACCGGGCGT	1A_BM	E	6	2	Low GC NAT	his3	Signal transduction
1270		BM52	individual barcode	CAGL0F03069g	CAD1	YDR423C	AACCTACGGGCATGTTCGTG	AATAGACCTTCATCGGGCGT	1A_BM	E	7	1	Low GC NAT	his3	Transcriptional regulation
1271		BM52	individual barcode	CAGL0F03069g	CAD1	YDR423C	AACCTACGGGCATGTTCGTG	AATAGACCTTCATCGGGCGT	1A_BM	E	7	2	Low GC NAT	his3	Transcriptional regulation
1272		BM53	individual barcode	CAGL0F04081g	TEC1-LIKE	YBR083W	AGAGCCTACCCAGGTCTAAG	TTCAGCCGGACCATTAGCAG	1A_BM	E	8	1	Low GC NAT	his3	Transcriptional regulation
1273		BM53	individual barcode	CAGL0F04081g	TEC1-LIKE	YBR083W	AGAGCCTACCCAGGTCTAAG	TTCAGCCGGACCATTAGCAG	1A_BM	E	8	2	Low GC NAT	his3	Transcriptional regulation
1274		BM54	individual barcode	CAGL0F05621g	HST4	YDR191W	GTTCAGTGCGGACTACTATT	TACCTCTAACCATTTGGAGC	1A_BM	E	9	1	Low GC NAT	his3	Chromatin
1275		BM54	individual barcode	CAGL0F05621g	HST4	YDR191W	GTTCAGTGCGGACTACTATT	TACCTCTAACCATTTGGAGC	1A_BM	E	9	2	Low GC NAT	his3	Chromatin
1276		BM55	individual barcode	CAGL0F05995g	MSN2	YMR037C	GCGCATAGTATATCAGTCTG	CATCGAGATTACCGCGTCTG	1A_BM	E	10	1	Low GC NAT	his3	Transcriptional regulation
1277		BM55	individual barcode	CAGL0F05995g	MSN2	YMR037C	GCGCATAGTATATCAGTCTG	CATCGAGATTACCGCGTCTG	1A_BM	E	10	2	Low GC NAT	his3	Transcriptional regulation
1278		BM56	individual barcode	CAGL0F06039g	TSP1	YMR039C	AGCATCGGCAGTAATGTAAG	GGAGAGTAGGATGGATGGCA	1A_BM	E	11	1	Low GC NAT	his3	Transcriptional regulation
1279		BM56	individual barcode	CAGL0F06039g	TSP1	YMR039C	AGCATCGGCAGTAATGTAAG	GGAGAGTAGGATGGATGGCA	1A_BM	E	11	2	Low GC NAT	his3	Transcriptional regulation
1280		BM57	individual barcode	CAGL0F06237g	MCM1	YMR043w	CGATCTTATACATTGCACCG	CCTGGAAACGGAAACTTGAG	1A_BM	E	12	1	Low GC NAT	his3	Transcriptional regulation
1281		BM57	individual barcode	CAGL0F06237g	MCM1	YMR043w	CGATCTTATACATTGCACCG	CCTGGAAACGGAAACTTGAG	1A_BM	E	12	2	Low GC NAT	his3	Transcriptional regulation
1282		BM58	individual barcode	CAGL0F06743g	DAL81	YIR023W	ATAGGACCCTCACGTTTACG	TACACGGGTGCTAATGTCCG	1A_BM	F	1	1	Low GC NAT	his3	Transcriptional regulation
1283		BM58	individual barcode	CAGL0F06743g	DAL81	YIR023W	ATAGGACCCTCACGTTTACG	TACACGGGTGCTAATGTCCG	1A_BM	F	1	2	Low GC NAT	his3	Transcriptional regulation
1284		BM59	individual barcode	CAGL0F07315g	SNF4	YGL115W	GGCTAACCGAAACCGTGACA	GAATACGTTATCAGGGTCGT	1A_BM	F	2	1	Low GC NAT	his3	Signal transduction
1285		BM59	individual barcode	CAGL0F07315g	SNF4	YGL115W	GGCTAACCGAAACCGTGACA	GAATACGTTATCAGGGTCGT	1A_BM	F	2	2	Low GC NAT	his3	Signal transduction
1286		BM60	individual barcode	CAGL0F07667g	MSS11	YMR164C	CATCAGACGCGATCATGTGG	GGCAAGGCACGCCAACTATA	1A_BM	F	3	1	Low GC NAT	his3	Transcriptional regulation
1287		BM60	individual barcode	CAGL0F07667g	MSS11	YMR164C	CATCAGACGCGATCATGTGG	GGCAAGGCACGCCAACTATA	1A_BM	F	3	2	Low GC NAT	his3	Transcriptional regulation
1288		BM61	individual barcode	CAGL0F07865g	UPC2	YDR213W	GTACTCCGGTTCAGCATGTT	TAGGAGCTACCAGGACCTTC	1A_BM	F	4	1	Low GC NAT	his3	Transcriptional regulation
1289		BM61	individual barcode	CAGL0F07865g	UPC2	YDR213W	GTACTCCGGTTCAGCATGTT	TAGGAGCTACCAGGACCTTC	1A_BM	F	4	2	Low GC NAT	his3	Transcriptional regulation
1290		BM62	individual barcode	CAGL0F08283g	GCN5	YGR252W	AGCATGTCTCTAACTGGACG	TTATATGGGTAAGCCGCCCG	1A_BM	F	5	1	Low GC NAT	his3	Chromatin
1291		BM62	individual barcode	CAGL0F08283g	GCN5	YGR252W	AGCATGTCTCTAACTGGACG	TTATATGGGTAAGCCGCCCG	1A_BM	F	5	2	Low GC NAT	his3	Chromatin
1292		BM63	individual barcode	CAGL0F09097g	SKN7	YHR206W	TCTGGATCAGTGGACGTAAT	TATGACTGCGGACGTTCGCT	1A_BM	F	6	1	Low GC NAT	his3	Transcriptional regulation
1293		BM63	individual barcode	CAGL0F09097g	SKN7	YHR206W	TCTGGATCAGTGGACGTAAT	TATGACTGCGGACGTTCGCT	1A_BM	F	6	2	Low GC NAT	his3	Transcriptional regulation
1294		BM64	individual barcode	CAGL0G00704g	SWD1	YAR003W	GGTATGCACTCACATCTATC	AAACACTAGTTGTGCGAGCA	1A_BM	F	7	1	Low GC NAT	his3	Chromatin
1295		BM64	individual barcode	CAGL0G00704g	SWD1	YAR003W	GGTATGCACTCACATCTATC	AAACACTAGTTGTGCGAGCA	1A_BM	F	7	2	Low GC NAT	his3	Chromatin
1296		BM65	individual barcode	CAGL0G02739g	XBP1	YIL101C	CGTGGCATTATCAGTATCCT	CGCAGCATAGCATTAAGTTC	1A_BM	F	8	1	Low GC NAT	his3	Transcriptional regulation
1297		BM65	individual barcode	CAGL0G02739g	XBP1	YIL101C	CGTGGCATTATCAGTATCCT	CGCAGCATAGCATTAAGTTC	1A_BM	F	8	2	Low GC NAT	his3	Transcriptional regulation
1298		BM66	individual barcode	CAGL0G03179g	ASK10	YGR097W	GGTTAATCCGAACTACCTAC	GGCCACCGACAATGAAGTCA	1A_BM	F	9	1	Low GC NAT	his3	Transcriptional regulation
1299		BM66	individual barcode	CAGL0G03179g	ASK10	YGR097W	GGTTAATCCGAACTACCTAC	GGCCACCGACAATGAAGTCA	1A_BM	F	9	2	Low GC NAT	his3	Transcriptional regulation
1300		BM67	individual barcode	CAGL0G03421g	FLO8	YER109C	CCTGATACGCAATGACGATA	TATATTGATCGAGGCTGGCT	1A_BM	F	10	1	Low GC NAT	his3	Transcriptional regulation
1301		BM67	individual barcode	CAGL0G03421g	FLO8	YER109C	CCTGATACGCAATGACGATA	TATATTGATCGAGGCTGGCT	1A_BM	F	10	2	Low GC NAT	his3	Transcriptional regulation
1302		BM68	individual barcode	CAGL0G04389g	GZF3	YJL110C	CATGCTACTGAATCCTATGC	CATCCATGTGAATACAGAGC	1A_BM	F	11	1	Low GC NAT	his3	Transcriptional regulation
1303		BM68	individual barcode	CAGL0G04389g	GZF3	YJL110C	CATGCTACTGAATCCTATGC	CATCCATGTGAATACAGAGC	1A_BM	F	11	2	Low GC NAT	his3	Transcriptional regulation
1304		BM69	individual barcode	CAGL0G05379g	GCR2	YNL199C	GCTACACCAACATAGGTTCA	ATATCTGCATCAGGCTGCGG	1A_BM	F	12	1	Low GC NAT	his3	Transcriptional regulation
1305		BM69	individual barcode	CAGL0G05379g	GCR2	YNL199C	GCTACACCAACATAGGTTCA	ATATCTGCATCAGGCTGCGG	1A_BM	F	12	2	Low GC NAT	his3	Transcriptional regulation
1306		BM70	individual barcode	CAGL0G06556g	PHO23	YNL097C	AGAGCTGTCAAACGGTGTAA	AAATGCTAGTCAAGCGGACC	1A_BM	G	1	1	Low GC NAT	his3	Chromatin
1307		BM70	individual barcode	CAGL0G06556g	PHO23	YNL097C	AGAGCTGTCAAACGGTGTAA	AAATGCTAGTCAAGCGGACC	1A_BM	G	1	2	Low GC NAT	his3	Chromatin
1308		BM71	individual barcode	CAGL0G07249g	YOX1	YML027W	GATGATATGGCATTCCAGTG	ATGGACCTCTACCGCGTATG	1A_BM	G	2	1	Low GC NAT	his3	Transcriptional regulation
1309		BM71	individual barcode	CAGL0G07249g	YOX1	YML027W	GATGATATGGCATTCCAGTG	ATGGACCTCTACCGCGTATG	1A_BM	G	2	2	Low GC NAT	his3	Transcriptional regulation
1310		BM72	individual barcode	CAGL0G08107g	GIS1	YDR096W	GAGACTAAGTTCGGAGAATC	GACCCTTATCCAGTCTTGTG	1A_BM	G	3	1	Low GC NAT	his3	Transcriptional regulation
1311		BM72	individual barcode	CAGL0G08107g	GIS1	YDR096W	GAGACTAAGTTCGGAGAATC	GACCCTTATCCAGTCTTGTG	1A_BM	G	3	2	Low GC NAT	his3	Transcriptional regulation
1312		BM73	individual barcode	CAGL0G08646g	POG1	YIL122W	GGCTCGCACATATCATAAAC	CATGTATGGGCAGGCTTCCT	1A_BM	G	4	1	Low GC NAT	his3	Other
1313		BM73	individual barcode	CAGL0G08646g	POG1	YIL122W	GGCTCGCACATATCATAAAC	CATGTATGGGCAGGCTTCCT	1A_BM	G	4	2	Low GC NAT	his3	Other
1314		BM74	individual barcode	CAGL0G08844g	ASG1	YIL130W	AGATATACGACAGACCTCGC	CCCAATGCTAAATGTGCAGA	1A_BM	G	5	1	Low GC NAT	his3	Transcriptional regulation
1315		BM74	individual barcode	CAGL0G08844g	ASG1	YIL130W	AGATATACGACAGACCTCGC	CCCAATGCTAAATGTGCAGA	1A_BM	G	5	2	Low GC NAT	his3	Transcriptional regulation
1316		BM75	individual barcode	CAGL0G08866g	FKH1	YIL131C	GATGATAGACCATACCTCGC	TCTCCCGAGCAAGAATCAGA	1A_BM	G	6	1	Low GC NAT	his3	Transcriptional regulation
1317		BM75	individual barcode	CAGL0G08866g	FKH1	YIL131C	GATGATAGACCATACCTCGC	TCTCCCGAGCAAGAATCAGA	1A_BM	G	6	2	Low GC NAT	his3	Transcriptional regulation
1318		BM76	individual barcode	CAGL0G09042g	AFT2	YPL202C	ATCATTGAGTCAGATCGGTG	CATGGCATTGAAGCTCACTC	1A_BM	G	7	1	Low GC NAT	his3	Transcriptional regulation
1319		BM76	individual barcode	CAGL0G09042g	AFT2	YPL202C	ATCATTGAGTCAGATCGGTG	CATGGCATTGAAGCTCACTC	1A_BM	G	7	2	Low GC NAT	his3	Transcriptional regulation
1320		BM77	individual barcode	CAGL0H02145g	STE12	YHR084W	CACGAGTGCTAAGATTTGAG	ACAGGCATGTGAATTTGTGC	1A_BM	G	8	1	Low GC NAT	his3	Transcriptional regulation
1321		BM77	individual barcode	CAGL0H02145g	STE12	YHR084W	CACGAGTGCTAAGATTTGAG	ACAGGCATGTGAATTTGTGC	1A_BM	G	8	2	Low GC NAT	his3	Transcriptional regulation
1322		BM78	individual barcode	CAGL0H02959g	TOS8	YGL096W	CGGCAGGTTGTACCAATTTG	GCCGCCGTAACAACGTAGAA	1A_BM	G	9	1	Low GC NAT	his3	Chromatin
1323		BM78	individual barcode	CAGL0H02959g	TOS8	YGL096W	CGGCAGGTTGTACCAATTTG	GCCGCCGTAACAACGTAGAA	1A_BM	G	9	2	Low GC NAT	his3	Chromatin
1324		BM79	individual barcode	CAGL0H03575g	SPO1	YNL012W	ACGTACAGTTAAGCGACTAG	ATTGATACCCACGCGGAACG	1A_BM	G	10	1	Low GC NAT	his3	Other
1325		BM79	individual barcode	CAGL0H03575g	SPO1	YNL012W	ACGTACAGTTAAGCGACTAG	ATTGATACCCACGCGGAACG	1A_BM	G	10	2	Low GC NAT	his3	Other
1326		BM80	individual barcode	CAGL0H04367g	WAR1	YML076C	TAGACTAGCACCATACTTGC	TCCACGGCGAGCAGTTTATG	1A_BM	G	11	1	Low GC NAT	his3	Transcriptional regulation
1327		BM80	individual barcode	CAGL0H04367g	WAR1	YML076C	TAGACTAGCACCATACTTGC	TCCACGGCGAGCAGTTTATG	1A_BM	G	11	2	Low GC NAT	his3	Transcriptional regulation
1328		BM81	individual barcode	CAGL0H05621g	RLM1	YPL089C	TATGCGCTAACAGGGTTCGC	TGAGTCTTCTAAGCTCTCCG	1A_BM	G	12	1	Low GC NAT	his3	Transcriptional regulation
1329		BM81	individual barcode	CAGL0H05621g	RLM1	YPL089C	TATGCGCTAACAGGGTTCGC	TGAGTCTTCTAAGCTCTCCG	1A_BM	G	12	2	Low GC NAT	his3	Transcriptional regulation
1330		BM82	individual barcode	CAGL0H06215g	GAL11-like	YOL051W	AAGATCATGTAACACCGCTC	CCTGTGCAGCAAGACTAATA	1A_BM	H	1	1	Low GC NAT	his3	Transcriptional regulation
1331		BM82	individual barcode	CAGL0H06215g	GAL11-like	YOL051W	AAGATCATGTAACACCGCTC	CCTGTGCAGCAAGACTAATA	1A_BM	H	1	2	Low GC NAT	his3	Transcriptional regulation
1332		BM83	individual barcode	CAGL0H06677g	IMP2'	YIL154C	TGATCTCTACGCACTTGCTG	CATATCCACTAAGGTTGCTC	1A_BM	H	2	1	Low GC NAT	his3	Transcriptional regulation
1333		BM83	individual barcode	CAGL0H06677g	IMP2'	YIL154C	TGATCTCTACGCACTTGCTG	CATATCCACTAAGGTTGCTC	1A_BM	H	2	2	Low GC NAT	his3	Transcriptional regulation
1334		BM84	individual barcode	CAGL0H06875g	ARG81	YML099C	TCATGGGAAGAAGCAGCCAC	CTCCAGTATGTTAAGAGTGG	1A_BM	H	3	1	Low GC NAT	his3	Transcriptional regulation
1335		BM84	individual barcode	CAGL0H06875g	ARG81	YML099C	TCATGGGAAGAAGCAGCCAC	CTCCAGTATGTTAAGAGTGG	1A_BM	H	3	2	Low GC NAT	his3	Transcriptional regulation
1336		BM85	individual barcode	CAGL0H07557g	FZF1	YGL254W	ACGGTATGTAAACCTACGGA	ACTCTCTTGGGATACGGGTT	1A_BM	H	4	1	Low GC NAT	his3	Transcriptional regulation
1337		BM85	individual barcode	CAGL0H07557g	FZF1	YGL254W	ACGGTATGTAAACCTACGGA	ACTCTCTTGGGATACGGGTT	1A_BM	H	4	2	Low GC NAT	his3	Transcriptional regulation
1338		BM86	individual barcode	CAGL0H07711g	RTF1	YGL244W	TTTAGTGTCCGCGCCACGTT	ACCCGTTATGGAGGTGTCTT	1A_BM	H	5	1	Low GC NAT	his3	Transcriptional regulation
1339		BM86	individual barcode	CAGL0H07711g	RTF1	YGL244W	TTTAGTGTCCGCGCCACGTT	ACCCGTTATGGAGGTGTCTT	1A_BM	H	5	2	Low GC NAT	his3	Transcriptional regulation
1340		BM87	individual barcode	CAGL0H07843g	HAP2	YGL237C	TATTAGTGCGGACCCGGCTT	ACCCGAGGAGCGTTAGACTT	1A_BM	H	6	1	Low GC NAT	his3	Transcriptional regulation
1341		BM87	individual barcode	CAGL0H07843g	HAP2	YGL237C	TATTAGTGCGGACCCGGCTT	ACCCGAGGAGCGTTAGACTT	1A_BM	H	6	2	Low GC NAT	his3	Transcriptional regulation
1342		BM88	individual barcode	CAGL0H08107g	HMS1	YOR032C	GTGTATCATCCCTATCACTG	CCATCCATGAGATATGTGAG	1A_BM	H	7	1	Low GC NAT	his3	Transcriptional regulation
1343		BM88	individual barcode	CAGL0H08107g	HMS1	YOR032C	GTGTATCATCCCTATCACTG	CCATCCATGAGATATGTGAG	1A_BM	H	7	2	Low GC NAT	his3	Transcriptional regulation
1344		BM89	individual barcode	CAGL0H08239g	HST3	YOR025W	ATGCGCTGCTAACTGCTGAG	CATAAGCAGGGCGAATACGC	1A_BM	H	8	1	Low GC NAT	his3	Chromatin
1345		BM89	individual barcode	CAGL0H08239g	HST3	YOR025W	ATGCGCTGCTAACTGCTGAG	CATAAGCAGGGCGAATACGC	1A_BM	H	8	2	Low GC NAT	his3	Chromatin
1346		BM90	individual barcode	CAGL0H08866g	HOT1	YMR172W	GCACGCTGACTATACTTCAT	GATTATGACACATCGCGTCC	1A_BM	H	9	1	Low GC NAT	his3	Transcriptional regulation
1347		BM90	individual barcode	CAGL0H08866g	HOT1	YMR172W	GCACGCTGACTATACTTCAT	GATTATGACACATCGCGTCC	1A_BM	H	9	2	Low GC NAT	his3	Transcriptional regulation
1348		BM91	individual barcode	CAGL0I00968g	HIR2	YOR038C	TCACTGCGGAGCACTTGTTG	TTGCATAGGCCACTCGACTG	1A_BM	H	10	1	Low GC NAT	his3	Transcriptional regulation
1349		BM91	individual barcode	CAGL0I00968g	HIR2	YOR038C	TCACTGCGGAGCACTTGTTG	TTGCATAGGCCACTCGACTG	1A_BM	H	10	2	Low GC NAT	his3	Transcriptional regulation
1350		BM92	individual barcode	CAGL0I02552g	STB5	YHR178W	TTCTCAGAGCTACCGACGTG	TTGCGCGAGCTATTCGGACT	1A_BM	H	11	1	Low GC NAT	his3	Transcriptional regulation
1351		BM92	individual barcode	CAGL0I02552g	STB5	YHR178W	TTCTCAGAGCTACCGACGTG	TTGCGCGAGCTATTCGGACT	1A_BM	H	11	2	Low GC NAT	his3	Transcriptional regulation
1352		BM93	individual barcode	CAGL0I04180g	CUP2	YGL166W	GGAGTACACTAACCCTAAGC	TTACTACGGACAGGACGGTC	1A_BM	H	12	1	Low GC NAT	his3	Transcriptional regulation
1353		BM93	individual barcode	CAGL0I04180g	CUP2	YGL166W	GGAGTACACTAACCCTAAGC	TTACTACGGACAGGACGGTC	1A_BM	H	12	2	Low GC NAT	his3	Transcriptional regulation
1354		BM94	individual barcode	CAGL0I04246g	SUT1	YGL162W	GAGTTAGGGACACTACCTCC	TTTACGAGGACATACCGGGC	2A_BM	A	4	1	Low GC NAT	his3	Transcriptional regulation
1355		BM94	individual barcode	CAGL0I04246g	SUT1	YGL162W	GAGTTAGGGACACTACCTCC	TTTACGAGGACATACCGGGC	2A_BM	A	4	2	Low GC NAT	his3	Transcriptional regulation
1356		BM95	individual barcode	CAGL0I05170g	CST6	YIL036W	ATCATCAGTGTGGAGAATCG	CCATTGATGACAGTGCAGAG	2A_BM	A	5	1	Low GC NAT	his3	Signal transduction
1357		BM95	individual barcode	CAGL0I05170g	CST6	YIL036W	ATCATCAGTGTGGAGAATCG	CCATTGATGACAGTGCAGAG	2A_BM	A	5	2	Low GC NAT	his3	Signal transduction
1358		BM96	individual barcode	CAGL0I07183g	SFL1	YOR140W	AGATGGCCGCTCCTCAGATT	GCCATAACCAGACAGGCGTA	2A_BM	A	6	1	Low GC NAT	his3	Transcriptional regulation
1359		BM96	individual barcode	CAGL0I07183g	SFL1	YOR140W	AGATGGCCGCTCCTCAGATT	GCCATAACCAGACAGGCGTA	2A_BM	A	6	2	Low GC NAT	his3	Transcriptional regulation
1360		BM97	individual barcode	CAGL0I07755g	HAL9	YOL089C	AGCCATGATTTCACATTCGG	CTTATTCATAGAGGCTTGGG	2A_BM	A	7	1	Low GC NAT	his3	Transcriptional regulation
1361		BM97	individual barcode	CAGL0I07755g	HAL9	YOL089C	AGCCATGATTTCACATTCGG	CTTATTCATAGAGGCTTGGG	2A_BM	A	7	2	Low GC NAT	his3	Transcriptional regulation
1362		BM98	individual barcode	CAGL0I08085g	EMI5	YOL071W	CTATGCGCTAGACGTAGTTG	CATGATGTCAGACGATGTTG	2A_BM	A	8	1	Low GC NAT	his3	Other
1363		BM98	individual barcode	CAGL0I08085g	EMI5	YOL071W	CTATGCGCTAGACGTAGTTG	CATGATGTCAGACGATGTTG	2A_BM	A	8	2	Low GC NAT	his3	Other
1364		BM99	individual barcode	CAGL0I10769g	MCM1-like	YMR043w	GCCACTGTATTAAGATAGCG	GCGGTACTCTCACTTCATAT	2A_BM	A	9	1	Low GC NAT	his3	Transcriptional regulation
1365		BM99	individual barcode	CAGL0I10769g	MCM1-like	YMR043w	GCCACTGTATTAAGATAGCG	GCGGTACTCTCACTTCATAT	2A_BM	A	9	2	Low GC NAT	his3	Transcriptional regulation
1366		BM100	individual barcode	CAGL0J03454g	HDA1	YNL021W	AGAGTCATCCCATTACCTAG	TAGGCTAAGAGTTGCTAACG	2A_BM	A	10	1	Low GC NAT	his3	Chromatin
1367		BM100	individual barcode	CAGL0J03454g	HDA1	YNL021W	AGAGTCATCCCATTACCTAG	TAGGCTAAGAGTTGCTAACG	2A_BM	A	10	2	Low GC NAT	his3	Chromatin
1368		BM101	individual barcode	CAGL0J03608g	HCM1	YCR065W	TCTACGCTGCGATGATTGGT	TATGTTCACGCATCGCACGG	2A_BM	A	11	1	Low GC NAT	his3	Transcriptional regulation
1369		BM101	individual barcode	CAGL0J03608g	HCM1	YCR065W	TCTACGCTGCGATGATTGGT	TATGTTCACGCATCGCACGG	2A_BM	A	11	2	Low GC NAT	his3	Transcriptional regulation
1370		BM102	individual barcode	CAGL0J04400g	HAP3	YBL021C	ATAGTGACGGAACTGTTAGC	AGGACATCTATAACTCCGTC	2A_BM	A	12	1	Low GC NAT	his3	Transcriptional regulation
1371		BM102	individual barcode	CAGL0J04400g	HAP3	YBL021C	ATAGTGACGGAACTGTTAGC	AGGACATCTATAACTCCGTC	2A_BM	A	12	2	Low GC NAT	his3	Transcriptional regulation
1372		BM103	individual barcode	CAGL0J05060g	ZAP1	YJL056C	CATCGAGTCTAACTTCTCAG	CCATGATATGAACGTAGAGC	2A_BM	B	1	1	Low GC NAT	his3	Transcriptional regulation
1373		BM103	individual barcode	CAGL0J05060g	ZAP1	YJL056C	CATCGAGTCTAACTTCTCAG	CCATGATATGAACGTAGAGC	2A_BM	B	1	2	Low GC NAT	his3	Transcriptional regulation
1374		BM104	individual barcode	CAGL0J06182g	SKO1	YNL167C	ATATGACCGCCCATGCGTAG	CACTAGCTGCAATGAGGTTA	2A_BM	B	2	1	Low GC NAT	his3	Transcriptional regulation
1375		BM104	individual barcode	CAGL0J06182g	SKO1	YNL167C	ATATGACCGCCCATGCGTAG	CACTAGCTGCAATGAGGTTA	2A_BM	B	2	2	Low GC NAT	his3	Transcriptional regulation
1376		BM105	individual barcode	CAGL0J06974g	HOS3	YPL116W	GAGATCATGCCATTCAAGCC	AGGCGATGATGGCATTTACT	2A_BM	B	3	1	Low GC NAT	his3	Chromatin
1377		BM105	individual barcode	CAGL0J06974g	HOS3	YPL116W	GAGATCATGCCATTCAAGCC	AGGCGATGATGGCATTTACT	2A_BM	B	3	2	Low GC NAT	his3	Chromatin
1378		BM106	individual barcode	CAGL0J07150g	PIP2	YOR363C	TTAGCCGCTCCATGTGCTTG	CGATGATCTAGCATTAGTCG	2A_BM	B	4	1	Low GC NAT	his3	Transcriptional regulation
1379		BM106	individual barcode	CAGL0J07150g	PIP2	YOR363C	TTAGCCGCTCCATGTGCTTG	CGATGATCTAGCATTAGTCG	2A_BM	B	4	2	Low GC NAT	his3	Transcriptional regulation
1380		BM107	individual barcode	CAGL0J07898g	GIS2	YNL255C	AGATGCACCCAATTCTTCGA	CAGATTGTCAAAGGTTCGCA	2A_BM	B	5	1	Low GC NAT	his3	Transcriptional regulation
1381		BM107	individual barcode	CAGL0J07898g	GIS2	YNL255C	AGATGCACCCAATTCTTCGA	CAGATTGTCAAAGGTTCGCA	2A_BM	B	5	2	Low GC NAT	his3	Transcriptional regulation
1382		BM108	individual barcode	CAGL0J07942g	SIP3	YNL257C	GCGCTCATAATAAACTCGCA	AGAGGCTTCTCATCCTATCT	2A_BM	B	6	1	Low GC NAT	his3	Transcriptional regulation
1383		BM108	individual barcode	CAGL0J07942g	SIP3	YNL257C	GCGCTCATAATAAACTCGCA	AGAGGCTTCTCATCCTATCT	2A_BM	B	6	2	Low GC NAT	his3	Transcriptional regulation
1384		BM109	individual barcode	CAGL0J10120g	FKH2	YNL068C	AGAGACTCCCAACGGCTTGA	ACATTGATAACACGGACGCC	2A_BM	B	7	1	Low GC NAT	his3	Transcriptional regulation
1385		BM109	individual barcode	CAGL0J10120g	FKH2	YNL068C	AGAGACTCCCAACGGCTTGA	ACATTGATAACACGGACGCC	2A_BM	B	7	2	Low GC NAT	his3	Transcriptional regulation
1386		BM110	individual barcode	CAGL0J10274g	MKS1	YNL076W	ACATACGGTAAAGCTGTGGA	AATGAGCGTCAAGATTTCCC	2A_BM	B	8	1	Low GC NAT	his3	Transcriptional regulation
1387		BM110	individual barcode	CAGL0J10274g	MKS1	YNL076W	ACATACGGTAAAGCTGTGGA	AATGAGCGTCAAGATTTCCC	2A_BM	B	8	2	Low GC NAT	his3	Transcriptional regulation
1388		BM111	individual barcode	CAGL0J10472g	SSN2	YDR443C	AAATTCCGCTGCGTCAGGGT	CTCGGACGAACAACGGTGAA	2A_BM	B	9	1	Low GC NAT	his3	Transcriptional regulation
1389		BM111	individual barcode	CAGL0J10472g	SSN2	YDR443C	AAATTCCGCTGCGTCAGGGT	CTCGGACGAACAACGGTGAA	2A_BM	B	9	2	Low GC NAT	his3	Transcriptional regulation
1390		BM112	individual barcode	CAGL0K03003g	MOT3	YMR070W	ATCCCATAGTGTTAAGGCGG	TATTCTTGACGCAGCTCGGG	2A_BM	B	10	1	Low GC NAT	his3	Transcriptional regulation
1391		BM112	individual barcode	CAGL0K03003g	MOT3	YMR070W	ATCCCATAGTGTTAAGGCGG	TATTCTTGACGCAGCTCGGG	2A_BM	B	10	2	Low GC NAT	his3	Transcriptional regulation
1392		BM113	individual barcode	CAGL0K03773g	SAS2	YMR127C	TGGCACTGCACAAGCAAGCA	ACTCTTCGCAGACGGTTTGG	2A_BM	B	11	1	Low GC NAT	his3	Chromatin
1393		BM113	individual barcode	CAGL0K03773g	SAS2	YMR127C	TGGCACTGCACAAGCAAGCA	ACTCTTCGCAGACGGTTTGG	2A_BM	B	11	2	Low GC NAT	his3	Chromatin
1394		BM114	individual barcode	CAGL0K04257g	RME1	YGR044C	CGTAAGTTTGAAGCCCTTTC	CCGGGTCCCAAAGGTACAAA	2A_BM	B	12	1	Low GC NAT	his3	Transcriptional regulation
1395		BM114	individual barcode	CAGL0K04257g	RME1	YGR044C	CGTAAGTTTGAAGCCCTTTC	CCGGGTCCCAAAGGTACAAA	2A_BM	B	12	2	Low GC NAT	his3	Transcriptional regulation
1396		BM115	individual barcode	CAGL0K04543g	SPT4	YGR063C	CTAACGTCTTTGAACTTGGG	GTTTGGGCACAACACACACA	2A_BM	C	1	1	Low GC NAT	his3	Transcriptional regulation
1397		BM115	individual barcode	CAGL0K04543g	SPT4	YGR063C	CTAACGTCTTTGAACTTGGG	GTTTGGGCACAACACACACA	2A_BM	C	1	2	Low GC NAT	his3	Transcriptional regulation
1398		BM116	individual barcode	CAGL0K05797g	EMI1	YDR512C	AGCCACTTCGTCCGATTGTT	CCGTACAGTCAAGTAAGGTA	2A_BM	C	2	1	Low GC NAT	his3	Transcriptional regulation
1399		BM116	individual barcode	CAGL0K05797g	EMI1	YDR512C	AGCCACTTCGTCCGATTGTT	CCGTACAGTCAAGTAAGGTA	2A_BM	C	2	2	Low GC NAT	his3	Transcriptional regulation
1400		BM117	individual barcode	CAGL0K05841g	HAP1-like	YLR256W-like	CACGTCACCGTATGTAGAGT	CACCAGCCGTGACTGTGTTT	2A_BM	C	3	1	Low GC NAT	his3	Transcriptional regulation
1401		BM117	individual barcode	CAGL0K05841g	HAP1-like	YLR256W-like	CACGTCACCGTATGTAGAGT	CACCAGCCGTGACTGTGTTT	2A_BM	C	3	2	Low GC NAT	his3	Transcriptional regulation
1402		BM118	individual barcode	CAGL0K06193g	ADA2	YDR448W	AACGCCTTCTCAGTATGGGT	CTGCGGGCGAAAGTTAATAA	2A_BM	C	4	1	Low GC NAT	his3	Transcriptional regulation
1403		BM118	individual barcode	CAGL0K06193g	ADA2	YDR448W	AACGCCTTCTCAGTATGGGT	CTGCGGGCGAAAGTTAATAA	2A_BM	C	4	2	Low GC NAT	his3	Transcriptional regulation
1404		BM119	individual barcode	CAGL0K06413g	STP1	YDR463W	ATCAGGACTTCCGCCGAATT	CCTGTTAGGAAACCCAGACA	2A_BM	C	5	1	Low GC NAT	his3	Transcriptional regulation
1405		BM119	individual barcode	CAGL0K06413g	STP1	YDR463W	ATCAGGACTTCCGCCGAATT	CCTGTTAGGAAACCCAGACA	2A_BM	C	5	2	Low GC NAT	his3	Transcriptional regulation
1406		BM120	individual barcode	CAGL0K07161g	SNF4-like	YGL115w	AGTACAGACTCACCCAGTAG	ACTTCAGCTACAGCGTTAGG	2A_BM	C	6	1	Low GC NAT	his3	Other
1407		BM120	individual barcode	CAGL0K07161g	SNF4-like	YGL115w	AGTACAGACTCACCCAGTAG	ACTTCAGCTACAGCGTTAGG	2A_BM	C	6	2	Low GC NAT	his3	Other
1408		BM121	individual barcode	CAGL0K07634g	GAT1	YFL021W	ACGACCGTCTAACTATGCAG	AACCACTGCGGACATAGGAG	2A_BM	C	7	1	Low GC NAT	his3	Transcriptional regulation
1409		BM121	individual barcode	CAGL0K07634g	GAT1	YFL021W	ACGACCGTCTAACTATGCAG	AACCACTGCGGACATAGGAG	2A_BM	C	7	2	Low GC NAT	his3	Transcriptional regulation
1410		BM122	individual barcode	CAGL0K08624g	HAP4	YKL109W	TGGAATACCCACGAACGGAC	CCATAAGACGTTGTGAAACC	2A_BM	C	8	1	Low GC NAT	his3	Transcriptional regulation
1411		BM122	individual barcode	CAGL0K08624g	HAP4	YKL109W	TGGAATACCCACGAACGGAC	CCATAAGACGTTGTGAAACC	2A_BM	C	8	2	Low GC NAT	his3	Transcriptional regulation
1412		BM123	individual barcode	CAGL0K08668g	MET28	YIR017C	GCAGACTTGTGAATCTTACG	TTAGGTCACTACGATCTCCG	2A_BM	C	9	1	Low GC NAT	his3	Transcriptional regulation
1413		BM123	individual barcode	CAGL0K08668g	MET28	YIR017C	GCAGACTTGTGAATCTTACG	TTAGGTCACTACGATCTCCG	2A_BM	C	9	2	Low GC NAT	his3	Transcriptional regulation
1414		BM124	individual barcode	CAGL0K08756g	YAP5	YIR018W	GAAACGCTTGTGAAGTTACG	TTAGGATGGACACCTCTCCG	2A_BM	C	10	1	Low GC NAT	his3	Transcriptional regulation
1415		BM124	individual barcode	CAGL0K08756g	YAP5	YIR018W	GAAACGCTTGTGAAGTTACG	TTAGGATGGACACCTCTCCG	2A_BM	C	10	2	Low GC NAT	his3	Transcriptional regulation
1416		BM125	individual barcode	CAGL0K09372g	MIG2	YGL209W	TATAGGTCCCGATACGCCGT	ACCCTTTGAGGAGCGGTAAT	2A_BM	C	11	1	Low GC NAT	his3	Transcriptional regulation
1417		BM125	individual barcode	CAGL0K09372g	MIG2	YGL209W	TATAGGTCCCGATACGCCGT	ACCCTTTGAGGAGCGGTAAT	2A_BM	C	11	2	Low GC NAT	his3	Transcriptional regulation
1418		BM126	individual barcode	CAGL0K09900g	HAP5	YOR358W	ATACTCAGGCTGGACAGTCG	GATGACATTCCACGTTCTGC	2A_BM	C	12	1	Low GC NAT	his3	Transcriptional regulation
1419		BM126	individual barcode	CAGL0K09900g	HAP5	YOR358W	ATACTCAGGCTGGACAGTCG	GATGACATTCCACGTTCTGC	2A_BM	C	12	2	Low GC NAT	his3	Transcriptional regulation
1420		BM127	individual barcode	CAGL0K11396g	SIR4	YDR227W	TGCGCCCTAAACAGCTTAAA	TACACTCGACGACACGGTAG	2A_BM	D	1	1	Low GC NAT	his3	Chromatin
1421		BM127	individual barcode	CAGL0K11396g	SIR4	YDR227W	TGCGCCCTAAACAGCTTAAA	TACACTCGACGACACGGTAG	2A_BM	D	1	2	Low GC NAT	his3	Chromatin
1422		BM128	individual barcode	CAGL0K11902g	LYS14	YDR034C	GCGCACATTAAACTTACCGA	GAAGGATCTCGAACACCTAC	2A_BM	D	2	1	Low GC NAT	his3	Transcriptional regulation
1423		BM128	individual barcode	CAGL0K11902g	LYS14	YDR034C	GCGCACATTAAACTTACCGA	GAAGGATCTCGAACACCTAC	2A_BM	D	2	2	Low GC NAT	his3	Transcriptional regulation
1424		BM129	individual barcode	CAGL0K12540g	HAC1	YFL031W	GTGAGCTAATACTCGATCAG	CATATCACTCGACATTGGAG	2A_BM	D	3	1	Low GC NAT	his3	Transcriptional regulation
1425		BM129	individual barcode	CAGL0K12540g	HAC1	YFL031W	GTGAGCTAATACTCGATCAG	CATATCACTCGACATTGGAG	2A_BM	D	3	2	Low GC NAT	his3	Transcriptional regulation
1426		BM130	individual barcode	CAGL0L01001g	NOT3	YIL038C	TATATGTGCATCCACCATCG	AGTATGCACGCCACTCAGAG	2A_BM	D	4	1	Low GC NAT	his3	Other
1427		BM130	individual barcode	CAGL0L01001g	NOT3	YIL038C	TATATGTGCATCCACCATCG	AGTATGCACGCCACTCAGAG	2A_BM	D	4	2	Low GC NAT	his3	Other
1428		BM131	individual barcode	CAGL0L01903g	RGT1	YKL038W	CATGGATCAACAGCCGCTTA	TGTCCACACAGGTAGAACAC	2A_BM	D	5	1	Low GC NAT	his3	Transcriptional regulation
1429		BM131	individual barcode	CAGL0L01903g	RGT1	YKL038W	CATGGATCAACAGCCGCTTA	TGTCCACACAGGTAGAACAC	2A_BM	D	5	2	Low GC NAT	his3	Transcriptional regulation
1430		BM132	individual barcode	CAGL0L02123g	SNF5	YBR289W	GCCGACTGGAAACTCATACA	ATGACGGATGTATGACGACT	2A_BM	D	6	1	Low GC NAT	his3	Transcriptional regulation
1431		BM132	individual barcode	CAGL0L02123g	SNF5	YBR289W	GCCGACTGGAAACTCATACA	ATGACGGATGTATGACGACT	2A_BM	D	6	2	Low GC NAT	his3	Transcriptional regulation
1432		BM133	individual barcode	CAGL0L02585g	BAS1	YKR099W	ACTATTCAGCCATGAGCGCG	CCTGATGCTACATAGTATCG	2A_BM	D	7	1	Low GC NAT	his3	Transcriptional regulation
1433		BM133	individual barcode	CAGL0L02585g	BAS1	YKR099W	ACTATTCAGCCATGAGCGCG	CCTGATGCTACATAGTATCG	2A_BM	D	7	2	Low GC NAT	his3	Transcriptional regulation
1434		BM134	individual barcode	CAGL0L02739g	SAS5	YOR213C	GGCGATCACAGACATTAACC	GACCGATATTCATAAGCCTC	2A_BM	D	8	1	Low GC NAT	his3	Chromatin
1435		BM134	individual barcode	CAGL0L02739g	SAS5	YOR213C	GGCGATCACAGACATTAACC	GACCGATATTCATAAGCCTC	2A_BM	D	8	2	Low GC NAT	his3	Chromatin
1436		BM135	individual barcode	CAGL0L03157g	DAL80	YKR034W	TATGATGAGACACCGACGCC	GTACAGAAAGAAGCCTCTCC	2A_BM	D	9	1	Low GC NAT	his3	Transcriptional regulation
1437		BM135	individual barcode	CAGL0L03157g	DAL80	YKR034W	TATGATGAGACACCGACGCC	GTACAGAAAGAAGCCTCTCC	2A_BM	D	9	2	Low GC NAT	his3	Transcriptional regulation
1438		BM136	individual barcode	CAGL0L03377g	SIP4	YJL089W	TATGGCGTCTCAGCGTCTCT	TATGTCTCGCCAGCGTTGTG	2A_BM	D	10	1	Low GC NAT	his3	Transcriptional regulation
1439		BM136	individual barcode	CAGL0L03377g	SIP4	YJL089W	TATGGCGTCTCAGCGTCTCT	TATGTCTCGCCAGCGTTGTG	2A_BM	D	10	2	Low GC NAT	his3	Transcriptional regulation
1440		BM137	individual barcode	CAGL0L03916g	AZF1-LIKE	YOR113W	ACGAGACCATAAGTTCTTCC	CGGAGAGACAGATTACACGC	2A_BM	D	11	1	Low GC NAT	his3	Transcriptional regulation
1441		BM137	individual barcode	CAGL0L03916g	AZF1-LIKE	YOR113W	ACGAGACCATAAGTTCTTCC	CGGAGAGACAGATTACACGC	2A_BM	D	11	2	Low GC NAT	his3	Transcriptional regulation
1442		BM138	individual barcode	CAGL0L04400g	YRR1	YOR162C	GCGCAGTATTCATAACTCTC	GTGCCTTATCAGCAAACAAC	2A_BM	D	12	1	Low GC NAT	his3	Transcriptional regulation
1443		BM138	individual barcode	CAGL0L04400g	YRR1	YOR162C	GCGCAGTATTCATAACTCTC	GTGCCTTATCAGCAAACAAC	2A_BM	D	12	2	Low GC NAT	his3	Transcriptional regulation
1444		BM139	individual barcode	CAGL0L04576g	YRM1	YOR172W	TGCGAGCGACTACTTGGCAT	GCGCTCGGATAACATAACAC	2A_BM	E	1	1	Low GC NAT	his3	Transcriptional regulation
1445		BM139	individual barcode	CAGL0L04576g	YRM1	YOR172W	TGCGAGCGACTACTTGGCAT	GCGCTCGGATAACATAACAC	2A_BM	E	1	2	Low GC NAT	his3	Transcriptional regulation
1446		BM140	individual barcode	CAGL0L05412g	ASF1	YJL115W	AGGCACACGGCACTATATGC	CAGCATGTAGAACGACGGAC	2A_BM	E	2	1	Low GC NAT	his3	Chromatin
1447		BM140	individual barcode	CAGL0L05412g	ASF1	YJL115W	AGGCACACGGCACTATATGC	CAGCATGTAGAACGACGGAC	2A_BM	E	2	2	Low GC NAT	his3	Chromatin
1448		BM141	individual barcode	CAGL0L06028g	GTS1	YGL181W	GGTTATTATCACTACCCACG	TTGGGACCCTCCATACTAGG	2A_BM	E	3	1	Low GC NAT	his3	Transcriptional regulation
1449		BM141	individual barcode	CAGL0L06028g	GTS1	YGL181W	GGTTATTATCACTACCCACG	TTGGGACCCTCCATACTAGG	2A_BM	E	3	2	Low GC NAT	his3	Transcriptional regulation
1450		BM142	individual barcode	CAGL0L06842g	THI3	YDL080C	CGCCTATCTATAATACCGAG	CCCTACGACTTATATCAGTG	2A_BM	E	4	1	Low GC NAT	his3	Other
1451		BM142	individual barcode	CAGL0L06842g	THI3	YDL080C	CGCCTATCTATAATACCGAG	CCCTACGACTTATATCAGTG	2A_BM	E	4	2	Low GC NAT	his3	Other
1452		BM143	individual barcode	CAGL0L07436g	PHO2	YDL106C	CTACTACGATGGCGTCGAAT	CCGCGTCTAGTATAGTATGT	2A_BM	E	5	1	Low GC NAT	his3	Transcriptional regulation
1453		BM143	individual barcode	CAGL0L07436g	PHO2	YDL106C	CTACTACGATGGCGTCGAAT	CCGCGTCTAGTATAGTATGT	2A_BM	E	5	2	Low GC NAT	his3	Transcriptional regulation
1454		BM144	individual barcode	CAGL0L08668g	HST2	YPL015C	TACACGCTCACAGGTACTAG	TACATTTGCCCACTGGCTGG	2A_BM	E	6	1	Low GC NAT	his3	Chromatin
1455		BM144	individual barcode	CAGL0L08668g	HST2	YPL015C	TACACGCTCACAGGTACTAG	TACATTTGCCCACTGGCTGG	2A_BM	E	6	2	Low GC NAT	his3	Chromatin
1456		BM145	individual barcode	CAGL0L09042g	HAT1	YPL001W	TCAGCTCGGTAACTTGCACG	TCCTTACAGTGGATGGAATG	2A_BM	E	7	1	Low GC NAT	his3	Chromatin
1457		BM145	individual barcode	CAGL0L09042g	HAT1	YPL001W	TCAGCTCGGTAACTTGCACG	TCCTTACAGTGGATGGAATG	2A_BM	E	7	2	Low GC NAT	his3	Chromatin
1458		BM146	individual barcode	CAGL0L09339g	HAA1	YPR008W	AACAGATAGTTGAACGGGTC	AGCCAGCGTACATTATCTTC	2A_BM	E	8	1	Low GC NAT	his3	Transcriptional regulation
1459		BM146	individual barcode	CAGL0L09339g	HAA1	YPR008W	AACAGATAGTTGAACGGGTC	AGCCAGCGTACATTATCTTC	2A_BM	E	8	2	Low GC NAT	his3	Transcriptional regulation
1460		BM147	individual barcode	CAGL0L09383g	SUT2	YPR009W	CTATACCAAACATACGGGTC	TAAGGACGGCTAACCTCTTC	2A_BM	E	9	1	Low GC NAT	his3	Transcriptional regulation
1461		BM147	individual barcode	CAGL0L09383g	SUT2	YPR009W	CTATACCAAACATACGGGTC	TAAGGACGGCTAACCTCTTC	2A_BM	E	9	2	Low GC NAT	his3	Transcriptional regulation
1462		BM148	individual barcode	CAGL0L09691g	PUT3	YKL015W	CCGATATTTCCAAGGCTGTA	GTGCCCTAATACAGATCAAC	2A_BM	E	10	1	Low GC NAT	his3	Transcriptional regulation
1463		BM148	individual barcode	CAGL0L09691g	PUT3	YKL015W	CCGATATTTCCAAGGCTGTA	GTGCCCTAATACAGATCAAC	2A_BM	E	10	2	Low GC NAT	his3	Transcriptional regulation
1464		BM149	individual barcode	CAGL0L11704g	SPT2	YER161C	CCACTTGTGAAAGCTGTAGA	TACGAGCGACTCAGATACGG	2A_BM	E	11	1	Low GC NAT	his3	Other
1465		BM149	individual barcode	CAGL0L11704g	SPT2	YER161C	CCACTTGTGAAAGCTGTAGA	TACGAGCGACTCAGATACGG	2A_BM	E	11	2	Low GC NAT	his3	Other
1466		BM150	individual barcode	CAGL0L11770g	CHD1	YER164W	CGGCATTAGCAATACCGATA	GCACTTTACATAGACTACGG	2A_BM	E	12	1	Low GC NAT	his3	Chromatin
1467		BM150	individual barcode	CAGL0L11770g	CHD1	YER164W	CGGCATTAGCAATACCGATA	GCACTTTACATAGACTACGG	2A_BM	E	12	2	Low GC NAT	his3	Chromatin
1468		BM151	individual barcode	CAGL0L11880g	RPH1	YER169W	GCGGCATCATAATTCTACAC	CTCTTTAACTGCCATTACGG	2A_BM	F	1	1	Low GC NAT	his3	Transcriptional regulation
1469		BM151	individual barcode	CAGL0L11880g	RPH1	YER169W	GCGGCATCATAATTCTACAC	CTCTTTAACTGCCATTACGG	2A_BM	F	1	2	Low GC NAT	his3	Transcriptional regulation
1470		BM152	individual barcode	CAGL0L12562g	MET31	YPL038W	TTACCAGCCATCAGGCGAAG	TATATCTTGCCCAGTGGCGG	2A_BM	F	2	1	Low GC NAT	his3	Transcriptional regulation
1471		BM152	individual barcode	CAGL0L12562g	MET31	YPL038W	TTACCAGCCATCAGGCGAAG	TATATCTTGCCCAGTGGCGG	2A_BM	F	2	2	Low GC NAT	his3	Transcriptional regulation
1472		BM153	individual barcode	CAGL0L12650g	SSN3	YPL042C	TCTAGTATGACAGAGGGTTC	TATGTTCTGACAGCCTCCGG	2A_BM	F	3	1	Low GC NAT	his3	Transcriptional regulation
1473		BM153	individual barcode	CAGL0L12650g	SSN3	YPL042C	TCTAGTATGACAGAGGGTTC	TATGTTCTGACAGCCTCCGG	2A_BM	F	3	2	Low GC NAT	his3	Transcriptional regulation
1474		BM154	individual barcode	CAGL0L12782g	DIG1	YPL049C	TATAGAGGAGGACAGACTTC	TATATGTCGAGCCACCACGG	2A_BM	F	4	1	Low GC NAT	his3	Transcriptional regulation
1475		BM154	individual barcode	CAGL0L12782g	DIG1	YPL049C	TATAGAGGAGGACAGACTTC	TATATGTCGAGCCACCACGG	2A_BM	F	4	2	Low GC NAT	his3	Transcriptional regulation
1476		BM155	individual barcode	CAGL0L13090g	NDT80	YHR124W	ATTGCATGTCAAGGCAGCCC	GCTCAGCATCAAGCACATTA	2A_BM	F	5	1	Low GC NAT	his3	Transcriptional regulation
1477		BM155	individual barcode	CAGL0L13090g	NDT80	YHR124W	ATTGCATGTCAAGGCAGCCC	GCTCAGCATCAAGCACATTA	2A_BM	F	5	2	Low GC NAT	his3	Transcriptional regulation
1478		BM156	individual barcode	CAGL0M00286g	HIR3	YJR140C	GCGGCGGATATGCTATAAAT	GCTCGACTATGCCTTCAGGT	2A_BM	F	6	1	Low GC NAT	his3	Transcriptional regulation
1479		BM156	individual barcode	CAGL0M00286g	HIR3	YJR140C	GCGGCGGATATGCTATAAAT	GCTCGACTATGCCTTCAGGT	2A_BM	F	6	2	Low GC NAT	his3	Transcriptional regulation
1480		BM157	individual barcode	CAGL0M00594g	ZMS1	YJR127C	GCGCAAATAAAGATGTCGTG	GATGCGCCCTCAGTTTGTCT	2A_BM	F	7	1	Low GC NAT	his3	Transcriptional regulation
1481		BM157	individual barcode	CAGL0M00594g	ZMS1	YJR127C	GCGCAAATAAAGATGTCGTG	GATGCGCCCTCAGTTTGTCT	2A_BM	F	7	2	Low GC NAT	his3	Transcriptional regulation
1482		BM158	individual barcode	CAGL0M01254g	STE12-LIKE	YHR084W	GGACGTAAGCGCATATTATC	ATGCTACAGGCACCAGAGTC	2A_BM	F	8	1	Low GC NAT	his3	Transcriptional regulation
1483		BM158	individual barcode	CAGL0M01254g	STE12-LIKE	YHR084W	GGACGTAAGCGCATATTATC	ATGCTACAGGCACCAGAGTC	2A_BM	F	8	2	Low GC NAT	his3	Transcriptional regulation
1484		BM159	individual barcode	CAGL0M01540g	SPT3	YDR392W	ATTACCTAGTCGGAGACAGG	ACCCGAGCGTTGATAATTCT	2A_BM	F	9	1	Low GC NAT	his3	Transcriptional regulation
1485		BM159	individual barcode	CAGL0M01540g	SPT3	YDR392W	ATTACCTAGTCGGAGACAGG	ACCCGAGCGTTGATAATTCT	2A_BM	F	9	2	Low GC NAT	his3	Transcriptional regulation
1486		BM160	individual barcode	CAGL0M01716g	TEC1	YBR083W	ATGCTACGGCCACTAGGTTG	ACCTGAGTTAGAGGATGACT	2A_BM	F	10	1	Low GC NAT	his3	Transcriptional regulation
1487		BM160	individual barcode	CAGL0M01716g	TEC1	YBR083W	ATGCTACGGCCACTAGGTTG	ACCTGAGTTAGAGGATGACT	2A_BM	F	10	2	Low GC NAT	his3	Transcriptional regulation
1488		BM161	individual barcode	CAGL0M02563g	UME1	YPL139C	CTCAGCCGAGTATATTGACT	GATGCACATTAAGGCTTGTC	2A_BM	F	11	1	Low GC NAT	his3	Transcriptional regulation
1489		BM161	individual barcode	CAGL0M02563g	UME1	YPL139C	CTCAGCCGAGTATATTGACT	GATGCACATTAAGGCTTGTC	2A_BM	F	11	2	Low GC NAT	his3	Transcriptional regulation
1490		BM162	individual barcode	CAGL0M02585g	SPP1	YPL138C	GATCGGCATCTAGCTTGACT	GCACGCTGCATACATTTGTC	2A_BM	F	12	1	Low GC NAT	his3	Chromatin
1491		BM162	individual barcode	CAGL0M02585g	SPP1	YPL138C	GATCGGCATCTAGCTTGACT	GCACGCTGCATACATTTGTC	2A_BM	F	12	2	Low GC NAT	his3	Chromatin
1492		BM163	individual barcode	CAGL0M02651g	RDS2	YPL133C	ACTGGTACGTGATCTGATGT	CAGTCTATACCATCTGCTAG	2A_BM	G	1	1	Low GC NAT	his3	Transcriptional regulation
1493		BM163	individual barcode	CAGL0M02651g	RDS2	YPL133C	ACTGGTACGTGATCTGATGT	CAGTCTATACCATCTGCTAG	2A_BM	G	1	2	Low GC NAT	his3	Transcriptional regulation
1494		BM164	individual barcode	CAGL0M02739g	TAF14	YPL129W	GCGTGACTGAAACAGCACCA	AATATCTACTGAGAGAGCGG	2A_BM	G	2	1	Low GC NAT	his3	Transcriptional regulation
1495		BM164	individual barcode	CAGL0M02739g	TAF14	YPL129W	GCGTGACTGAAACAGCACCA	AATATCTACTGAGAGAGCGG	2A_BM	G	2	2	Low GC NAT	his3	Transcriptional regulation
1496		BM165	individual barcode	CAGL0M03025g	CAT8	YMR280C	GCGATTGGAACACATGAGAC	TATAGCCAGACATCAGCAGC	2A_BM	G	3	1	Low GC NAT	his3	Transcriptional regulation
1497		BM165	individual barcode	CAGL0M03025g	CAT8	YMR280C	GCGATTGGAACACATGAGAC	TATAGCCAGACATCAGCAGC	2A_BM	G	3	2	Low GC NAT	his3	Transcriptional regulation
1498		BM166	individual barcode	CAGL0M03927g	STB1	YNL309W	AGACTGACGCAAGGCACCTA	GAGTCCCTGGCATCTGATCT	2A_BM	G	4	1	Low GC NAT	his3	Transcriptional regulation
1499		BM166	individual barcode	CAGL0M03927g	STB1	YNL309W	AGACTGACGCAAGGCACCTA	GAGTCCCTGGCATCTGATCT	2A_BM	G	4	2	Low GC NAT	his3	Transcriptional regulation
1500		BM167	individual barcode	CAGL0M04015g	DAL82	YNL314W	GCCCAGTATGTAAATGTCGA	AGCTACTCTGCATTCTCGAT	2A_BM	G	5	1	Low GC NAT	his3	Transcriptional regulation
1501		BM167	individual barcode	CAGL0M04015g	DAL82	YNL314W	GCCCAGTATGTAAATGTCGA	AGCTACTCTGCATTCTCGAT	2A_BM	G	5	2	Low GC NAT	his3	Transcriptional regulation
1502		BM168	individual barcode	CAGL0M04323g	ACE2	YLR131C	TCCACGTCCTCAGGTATTGT	AAGGTCGGTCAAGTCTATCC	2A_BM	G	6	1	Low GC NAT	his3	Transcriptional regulation
1503		BM168	individual barcode	CAGL0M04323g	ACE2	YLR131C	TCCACGTCCTCAGGTATTGT	AAGGTCGGTCAAGTCTATCC	2A_BM	G	6	2	Low GC NAT	his3	Transcriptional regulation
1504		BM169	individual barcode	CAGL0M06325g	SMP1	YBR182C	AGTATTCGGCTCCACAGCGT	ACGGCGCTTGTCATCTCGTT	2A_BM	G	7	1	Low GC NAT	his3	Transcriptional regulation
1505		BM169	individual barcode	CAGL0M06325g	SMP1	YBR182C	AGTATTCGGCTCCACAGCGT	ACGGCGCTTGTCATCTCGTT	2A_BM	G	7	2	Low GC NAT	his3	Transcriptional regulation
1506		BM170	individual barcode	CAGL0M06699g	SDS3	YIL084C	TCCGCATAGAGATTACAGAG	CAACATAAGCCAGTGGGAGC	2A_BM	G	8	1	Low GC NAT	his3	Chromatin
1507		BM170	individual barcode	CAGL0M06699g	SDS3	YIL084C	TCCGCATAGAGATTACAGAG	CAACATAAGCCAGTGGGAGC	2A_BM	G	8	2	Low GC NAT	his3	Chromatin
1508		BM171	individual barcode	CAGL0M06831g	CRZ1	YNL027W	GGGTACTTCACCATTCCTAG	CACACGGCATGGGATTAACG	2A_BM	G	9	1	Low GC NAT	his3	Transcriptional regulation
1509		BM171	individual barcode	CAGL0M06831g	CRZ1	YNL027W	GGGTACTTCACCATTCCTAG	CACACGGCATGGGATTAACG	2A_BM	G	9	2	Low GC NAT	his3	Transcriptional regulation
1510		BM172	individual barcode	CAGL0M06875g	SSN8	YNL025C	CCTTAGATACCATTGCCTAG	GCTGACCATTGATCGTAACG	2A_BM	G	10	1	Low GC NAT	his3	Signal transduction
1511		BM172	individual barcode	CAGL0M06875g	SSN8	YNL025C	CCTTAGATACCATTGCCTAG	GCTGACCATTGATCGTAACG	2A_BM	G	10	2	Low GC NAT	his3	Signal transduction
1512		BM173	individual barcode	CAGL0M06919g	FAP1	YNL023C	AGGACGCTCTCTAAGCCTAG	GTATCGAAGGCCGTCTAACG	2A_BM	G	11	1	Low GC NAT	his3	Vacuole, Golgi
1513		BM173	individual barcode	CAGL0M06919g	FAP1	YNL023C	AGGACGCTCTCTAAGCCTAG	GTATCGAAGGCCGTCTAACG	2A_BM	G	11	2	Low GC NAT	his3	Vacuole, Golgi
1514		BM174	individual barcode	CAGL0M07634g	SOK2	YMR016C	GCGCCGACCACAGAATGATA	GGCTCTAACAGACCCGATCT	2A_BM	G	12	1	Low GC NAT	his3	Transcriptional regulation
1515		BM174	individual barcode	CAGL0M07634g	SOK2	YMR016C	GCGCCGACCACAGAATGATA	GGCTCTAACAGACCCGATCT	2A_BM	G	12	2	Low GC NAT	his3	Transcriptional regulation
1516		BM175	individual barcode	CAGL0M08800g	YAP6	YDR259C	TGAGTTCGTACACCTCGTCG	TAGGGCGTTCCATCTTGCCT	2A_BM	H	1	1	Low GC NAT	his3	Transcriptional regulation
1517		BM175	individual barcode	CAGL0M08800g	YAP6	YDR259C	TGAGTTCGTACACCTCGTCG	TAGGGCGTTCCATCTTGCCT	2A_BM	H	1	2	Low GC NAT	his3	Transcriptional regulation
1518		BM176	individual barcode	CAGL0M09042g	IME1	YJR094C	GCTGTAATCGCTTGTAATGG	GAGGCTGATCGACTTCCACT	2A_BM	H	2	1	Low GC NAT	his3	Transcriptional regulation
1519		BM176	individual barcode	CAGL0M09042g	IME1	YJR094C	GCTGTAATCGCTTGTAATGG	GAGGCTGATCGACTTCCACT	2A_BM	H	2	2	Low GC NAT	his3	Transcriptional regulation
1520		BM177	individual barcode	CAGL0M09405g	RTG3	YBL103C	AGTCTACCCACATGCTTTAG	ATTCATCGGACACTTGCCGG	2A_BM	H	3	1	Low GC NAT	his3	Transcriptional regulation
1521		BM177	individual barcode	CAGL0M09405g	RTG3	YBL103C	AGTCTACCCACATGCTTTAG	ATTCATCGGACACTTGCCGG	2A_BM	H	3	2	Low GC NAT	his3	Transcriptional regulation
1522		BM178	individual barcode	CAGL0M09955g	SFP1	YLR403W	AGGAACAGACCATCTACTGC	CTACACGATGCACAGTAATC	2A_BM	H	4	1	Low GC NAT	his3	Transcriptional regulation
1523		BM178	individual barcode	CAGL0M09955g	SFP1	YLR403W	AGGAACAGACCATCTACTGC	CTACACGATGCACAGTAATC	2A_BM	H	4	2	Low GC NAT	his3	Transcriptional regulation
1524		BM179	individual barcode	CAGL0M10087g	YAP3-like	YHL009C	AAGGATGTCTAACACTCTCC	ATATGGGTGGAAGCTCCCTC	2A_BM	H	5	1	Low GC NAT	his3	Transcriptional regulation
1525		BM179	individual barcode	CAGL0M10087g	YAP3-like	YHL009C	AAGGATGTCTAACACTCTCC	ATATGGGTGGAAGCTCCCTC	2A_BM	H	5	2	Low GC NAT	his3	Transcriptional regulation
1526		BM180	individual barcode	CAGL0M11440g	CHA4	YLR098C	TCGGCCCACAGGCATAAAGA	TCAGACATTACAGGAACTCC	2A_BM	H	6	1	Low GC NAT	his3	Transcriptional regulation
1527		BM180	individual barcode	CAGL0M11440g	CHA4	YLR098C	TCGGCCCACAGGCATAAAGA	TCAGACATTACAGGAACTCC	2A_BM	H	6	2	Low GC NAT	his3	Transcriptional regulation
1528		BM181	individual barcode	CAGL0M12298g	OAF1	YAL051W	GATGACAGTACAGTTGACAG	CACTGAGTTAACGGAGTAGT	2A_BM	H	7	1	Low GC NAT	his3	Transcriptional regulation
1529		BM181	individual barcode	CAGL0M12298g	OAF1	YAL051W	GATGACAGTACAGTTGACAG	CACTGAGTTAACGGAGTAGT	2A_BM	H	7	2	Low GC NAT	his3	Transcriptional regulation
1530		BM182	individual barcode	CAGL0M13189g	MSN4	YKL062W	AATGCTCGGCAACCGCTTTA	TAAACACCTGGGCAATGCAC	2A_BM	H	8	1	Low GC NAT	his3	Transcriptional regulation
1531		BM182	individual barcode	CAGL0M13189g	MSN4	YKL062W	AATGCTCGGCAACCGCTTTA	TAAACACCTGGGCAATGCAC	2A_BM	H	8	2	Low GC NAT	his3	Transcriptional regulation
1532		BG1	individual barcode	CAGL0A00583g	PDR8	YLR266c	GGATGACCACCAGACTAAGC	ATAGGATTAGCACACCGCGC	BG	A	1	1	Low GC NAT	his3	Transcriptional regulation
1533		BG2	individual barcode	CAGL0A00583g	PDR8	YLR266c	GGATGACCACCAGACTAAGC	ATAGGATTAGCACACCGCGC	BG	A	2	1	Low GC NAT	his3	Transcriptional regulation
1534		BG3	individual barcode	CAGL0D03608g	N/A	N/A	ATAAGGCGCTGGAACCCATC	AATTATGGCTAAGCGTCGAG	BG	A	3	1	Low GC NAT	his3	Transcriptional regulation
1535		BG4	individual barcode	CAGL0D03608g	N/A	N/A	ATAAGGCGCTGGAACCCATC	AATTATGGCTAAGCGTCGAG	BG	A	4	1	Low GC NAT	his3	Transcriptional regulation
1536		BG5	individual barcode	CAGL0D03850g	RSC3	YDR303c	ATATCCTTGGAAGCCTGGGC	AATGCGACATCTTAACCCAG	BG	A	5	1	Low GC NAT	his3	Other
1537		BG6	individual barcode	CAGL0D03850g	RSC3	YDR303c	ATATCCTTGGAAGCCTGGGC	AATGCGACATCTTAACCCAG	BG	A	6	1	Low GC NAT	his3	Other
1538		BG7	individual barcode	CAGL0E00341g	HMRA1	YCR097w	ATACTTGCGGAAGCTACGGC	ATTACATACGCGCTGGGAAG	BG	A	7	1	Low GC NAT	his3	Other
1539		BG8	individual barcode	CAGL0E00341g	HMRA1	YCR097w	ATACTTGCGGAAGCTACGGC	ATTACATACGCGCTGGGAAG	BG	A	8	1	Low GC NAT	his3	Other
1540		BG9	individual barcode	CAGL0E05434g	TEA1	YOR337w	CAAGCATCCGCAAGTTAGTA	CAGATGGTGAAATCGACTCA	BG	A	9	1	Low GC NAT	his3	Transcriptional regulation
1541		BG10	individual barcode	CAGL0E05434g	TEA1	YOR337w	CAAGCATCCGCAAGTTAGTA	CAGATGGTGAAATCGACTCA	BG	A	10	1	Low GC NAT	his3	Transcriptional regulation
1542		BG11	individual barcode	CAGL0E06116g	YPL230W	YPL230w	AAGGTACTGGAAGCTACTGC	AATAGCGCCTAAGGGCTCAG	BG	A	11	1	Low GC NAT	his3	Transcriptional regulation
1543		BG12	individual barcode	CAGL0E06116g	YPL230W	YPL230w	AAGGTACTGGAAGCTACTGC	AATAGCGCCTAAGGGCTCAG	BG	A	12	1	Low GC NAT	his3	Transcriptional regulation
1544		BG13	individual barcode	CAGL0F02519g	YJL206C	YJL206c	TAGTCGTCAGCACGTCTGTG	AATGAGGCTTCACCACTGCG	BG	B	1	1	Low GC NAT	his3	Transcriptional regulation
1545		BG14	individual barcode	CAGL0F02519g	YJL206C	YJL206c	TAGTCGTCAGCACGTCTGTG	AATGAGGCTTCACCACTGCG	BG	B	2	1	Low GC NAT	his3	Transcriptional regulation
1546		BG15	individual barcode	CAGL0F02783g	SIZ1	YDR409w	ATTCCTACGCCAGTTGTGGG	ATTACTCCGTGAGGCGACGT	BG	B	3	1	Low GC NAT	his3	Chromatin
1547		BG16	individual barcode	CAGL0F02783g	SIZ1	YDR409w	ATTCCTACGCCAGTTGTGGG	ATTACTCCGTGAGGCGACGT	BG	B	4	1	Low GC NAT	his3	Chromatin
1548		BG17	individual barcode	CAGL0F05159g	VPS72	YDR485c	ATTACGCGGCGAGTAGCCTT	CCGAATCCTAAAGGGCGAGA	BG	B	5	1	Low GC NAT	his3	Chromatin
1549		BG18	individual barcode	CAGL0F05159g	VPS72	YDR485c	ATTACGCGGCGAGTAGCCTT	CCGAATCCTAAAGGGCGAGA	BG	B	6	1	Low GC NAT	his3	Chromatin
1550		BG19	individual barcode	CAGL0F07909g	HAL9	YOL089c	AGCCATGATTTCACATTCGG	CTTATTCATAGAGGCTTGGG	BG	B	7	1	Low GC NAT	his3	Transcriptional regulation
1551		BG20	individual barcode	CAGL0F07909g	HAL9	YOL089c	AGCCATGATTTCACATTCGG	CTTATTCATAGAGGCTTGGG	BG	B	8	1	Low GC NAT	his3	Transcriptional regulation
1552		BG21	individual barcode	CAGL0F09229g	YER184C	YER184c	AAGCACATTGTCCTCAAGTC	TGAGACGTTCTGTAACCCGG	BG	B	9	1	Low GC NAT	his3	Transcriptional regulation
1553		BG22	individual barcode	CAGL0F09229g	YER184C	YER184c	AAGCACATTGTCCTCAAGTC	TGAGACGTTCTGTAACCCGG	BG	B	10	1	Low GC NAT	his3	Transcriptional regulation
1554		BG23	individual barcode	CAGL0G09757g	YLR278C	YLR278c	AGTGTTACCACATCGGCAGC	CGGACGACTATAATAATCGC	BG	B	11	1	Low GC NAT	his3	Transcriptional regulation
1555		BG24	individual barcode	CAGL0G09757g	YLR278C	YLR278c	AGTGTTACCACATCGGCAGC	CGGACGACTATAATAATCGC	BG	B	12	1	Low GC NAT	his3	Transcriptional regulation
1556		BG25	individual barcode	CAGL0H01683g	YDR520C	YDR520c	AGGGCCGTCTTCTCAGCTTT	CCTTGCCAGGAAGACGAAAC	BG	C	1	1	Low GC NAT	his3	Transcriptional regulation
1557		BG26	individual barcode	CAGL0H01683g	YDR520C	YDR520c	AGGGCCGTCTTCTCAGCTTT	CCTTGCCAGGAAGACGAAAC	BG	C	2	1	Low GC NAT	his3	Transcriptional regulation
1558		BG27	individual barcode	CAGL0H03751g	RFX1	YLR176c	AATATGCGGAAACCGGGTCA	ATAGTTGGACCACCGTACTC	BG	C	3	1	Low GC NAT	his3	Other
1559		BG28	individual barcode	CAGL0H03751g	RFX1	YLR176c	AATATGCGGAAACCGGGTCA	ATAGTTGGACCACCGTACTC	BG	C	4	1	Low GC NAT	his3	Other
1560		BG29	individual barcode	CAGL0H04213g	YML081W	YML081w	AATATACTTGAAGGCGTGGC	ATACGAGACCCAGTTCGCAG	BG	C	5	1	Low GC NAT	his3	Transcriptional regulation
1561		BG30	individual barcode	CAGL0H04213g	YML081W	YML081w	AATATACTTGAAGGCGTGGC	ATACGAGACCCAGTTCGCAG	BG	C	6	1	Low GC NAT	his3	Transcriptional regulation
1562		BG31	individual barcode	CAGL0H04873g	STP3	YLR375w	CGGGAAGATTTATGCAATGC	GGCCGCATTAGTTAGAAATC	BG	C	7	1	Low GC NAT	his3	Transcriptional regulation
1563		BG32	individual barcode	CAGL0H04873g	STP3	YLR375w	CGGGAAGATTTATGCAATGC	GGCCGCATTAGTTAGAAATC	BG	C	8	1	Low GC NAT	his3	Transcriptional regulation
1564		BG33	individual barcode	CAGL0J04356g	APN2	YBL019w	AATTTCCGCGAAGCGTGAGC	ATGGAGACCCTAGACACGTC	BG	C	9	1	Low GC NAT	his3	Other
1565		BG34	individual barcode	CAGL0J04356g	APN2	YBL019w	AATTTCCGCGAAGCGTGAGC	ATGGAGACCCTAGACACGTC	BG	C	10	1	Low GC NAT	his3	Other
1566		BG35	individual barcode	CAGL0J07370g	JJJ1	YNL227c	TGATGCCACGTCACCAGTAG	ACACTGCGGCAAGAGCGTTA	BG	C	11	1	Low GC NAT	his3	Transcriptional regulation
1567		BG36	individual barcode	CAGL0J07370g	JJJ1	YNL227c	TGATGCCACGTCACCAGTAG	ACACTGCGGCAAGAGCGTTA	BG	C	12	1	Low GC NAT	his3	Transcriptional regulation
1568		BG37	individual barcode	CAGL0J10296g	APJ1	YNL077w	ACAGGAGTACAACTTCTGGA	AAGGACTGTCAATCATTCCC	BG	D	1	1	Low GC NAT	his3	Other
1569		BG38	individual barcode	CAGL0J10296g	APJ1	YNL077w	ACAGGAGTACAACTTCTGGA	AAGGACTGTCAATCATTCCC	BG	D	2	1	Low GC NAT	his3	Other
1570		BG39	individual barcode	CAGL0K02145g	YER130C	YER130c	ATCCAGCCAGAGTGGTCAAG	GGATCATCATCAATGTCCAC	BG	D	3	1	Low GC NAT	his3	Transcriptional regulation
1571		BG40	individual barcode	CAGL0K02145g	YER130C	YER130c	ATCCAGCCAGAGTGGTCAAG	GGATCATCATCAATGTCCAC	BG	D	4	1	Low GC NAT	his3	Transcriptional regulation
1572		BG41	individual barcode	CAGL0K02343g	YPR022C	YPR022c	CCTAAGTCTACAGAGATGTC	TGTCGCTGAAGACTTAGTTC	BG	D	5	1	Low GC NAT	his3	Transcriptional regulation
1573		BG42	individual barcode	CAGL0K02343g	YPR022C	YPR022c	CCTAAGTCTACAGAGATGTC	TGTCGCTGAAGACTTAGTTC	BG	D	6	1	Low GC NAT	his3	Transcriptional regulation
1574		BG43	individual barcode	CAGL0K04631g	YGR067C	YGR067c	CCCGAGGTTACATTATTTGG	TTGCCAGCGCACAAATGACA	BG	D	7	1	Low GC NAT	his3	Transcriptional regulation
1575		BG44	individual barcode	CAGL0K04631g	YGR067C	YGR067c	CCCGAGGTTACATTATTTGG	TTGCCAGCGCACAAATGACA	BG	D	8	1	Low GC NAT	his3	Transcriptional regulation
1576		BG45	individual barcode	CAGL0K04697g	STP4	YDL048c	CCGTGCTACTAATGTAAGTC	CTATATTTATGGACAGCGGG	BG	D	9	1	Low GC NAT	his3	Transcriptional regulation
1577		BG46	individual barcode	CAGL0K04697g	STP4	YDL048c	CCGTGCTACTAATGTAAGTC	CTATATTTATGGACAGCGGG	BG	D	10	1	Low GC NAT	his3	Transcriptional regulation
1578		BG47	individual barcode	CAGL0K06985g	YBR239C	YBR239c	ACACCTGAGTAGGCGCGATT	CCGGCTGCTAAATACTAACA	BG	D	11	1	Low GC NAT	his3	Transcriptional regulation
1579		BG48	individual barcode	CAGL0K06985g	YBR239C	YBR239c	ACACCTGAGTAGGCGCGATT	CCGGCTGCTAAATACTAACA	BG	D	12	1	Low GC NAT	his3	Transcriptional regulation
1580		BG49	individual barcode	CAGL0K12078g	NRG1	YDR043c	GCAGAACGTAAAGCCCTCGA	GCGACCACATAAGTCTTTAC	BG	E	1	1	Low GC NAT	his3	Transcriptional regulation
1581		BG50	individual barcode	CAGL0K12078g	NRG1	YDR043c	GCAGAACGTAAAGCCCTCGA	GCGACCACATAAGTCTTTAC	BG	E	2	1	Low GC NAT	his3	Transcriptional regulation
1582		BG51	individual barcode	CAGL0L00583g	YPL230W	YPL230w	GCGCATAGACGAGCATAAGC	AGTCGCGCTGTCCATTTGCT	BG	E	3	1	Low GC NAT	his3	Transcriptional regulation
1583		BG52	individual barcode	CAGL0L00583g	YPL230W	YPL230w	GCGCATAGACGAGCATAAGC	AGTCGCGCTGTCCATTTGCT	BG	E	4	1	Low GC NAT	his3	Transcriptional regulation
1584		BG53	individual barcode	CAGL0L03674g	YJL103C	YJL103c	ATATCACGCTCGACAGTGCG	CGCTGGAACGTATATTATGC	BG	E	5	1	Low GC NAT	his3	Transcriptional regulation
1585		BG54	individual barcode	CAGL0L03674g	YJL103C	YJL103c	ATATCACGCTCGACAGTGCG	CGCTGGAACGTATATTATGC	BG	E	6	1	Low GC NAT	his3	Transcriptional regulation
1586		BG55	individual barcode	CAGL0L04290g	NFI1	YOR156c	CACGACTGTGAACTATCATC	GCCCATCGTGAAGAATGTTA	BG	E	7	1	Low GC NAT	his3	Other
1587		BG56	individual barcode	CAGL0L04290g	NFI1	YOR156c	CACGACTGTGAACTATCATC	GCCCATCGTGAAGAATGTTA	BG	E	8	1	Low GC NAT	his3	Other
1588		BG57	individual barcode	CAGL0L06072g	YER130C	YER130c	AGCCTAAGCACACTTTGGGC	AATATGGCCTAATCCTCCAG	BG	E	9	1	Low GC NAT	his3	Transcriptional regulation
1589		BG58	individual barcode	CAGL0L06072g	YER130C	YER130c	AGCCTAAGCACACTTTGGGC	AATATGGCCTAATCCTCCAG	BG	E	10	1	Low GC NAT	his3	Transcriptional regulation
1590		BG59	individual barcode	CAGL0L06776g	GAT2	YMR136w	AAGACGACGTAAGCCCATGC	AGGAGACGTTGATAACTCAG	BG	E	11	1	Low GC NAT	his3	Transcriptional regulation
1591		BG60	individual barcode	CAGL0L06776g	GAT2	YMR136w	AAGACGACGTAAGCCCATGC	AGGAGACGTTGATAACTCAG	BG	E	12	1	Low GC NAT	his3	Transcriptional regulation
1592		BG61	individual barcode	CAGL0L07480g	NRG2	YBR066c	ACACTTCTACCATTGGCAGG	ATTACCGCTCCAGTGTGGTG	BG	F	1	1	Low GC NAT	his3	Transcriptional regulation
1593		BG62	individual barcode	CAGL0L07480g	NRG2	YBR066c	ACACTTCTACCATTGGCAGG	ATTACCGCTCCAGTGTGGTG	BG	F	2	1	Low GC NAT	his3	Transcriptional regulation
1594		BG63	individual barcode	CAGL0L08162g	SNT1	YCR033w	GATTAGCTCACATACCTTGC	AGAGCAGAGACATTATTCCC	BG	F	3	1	Low GC NAT	his3	Other
1595		BG64	individual barcode	CAGL0L08162g	SNT1	YCR033w	GATTAGCTCACATACCTTGC	AGAGCAGAGACATTATTCCC	BG	F	4	1	Low GC NAT	his3	Other
1596		BG65	individual barcode	CAGL0M01870g	YPR013C	YPR013c	AATCTTACGGAATCGTCTGC	AATGTAACCGCATGGGTCAG	BG	F	5	1	Low GC NAT	his3	Transcriptional regulation
1597		BG66	individual barcode	CAGL0M01870g	YPR013C	YPR013c	AATCTTACGGAATCGTCTGC	AATGTAACCGCATGGGTCAG	BG	F	6	1	Low GC NAT	his3	Transcriptional regulation
1598		BG67	individual barcode	CAGL0M04983g	MBF1	YOR298c-a	ATCCCAAGGAGTGGCAAGAC	TCGACCGATTCCAGAGACTG	BG	F	7	1	Low GC NAT	his3	Transcriptional regulation
1599		BG68	individual barcode	CAGL0M04983g	MBF1	YOR298c-a	ATCCCAAGGAGTGGCAAGAC	TCGACCGATTCCAGAGACTG	BG	F	8	1	Low GC NAT	his3	Transcriptional regulation
1600		BG69	individual barcode	CAGL0J01595g	YPR015C	YPR015c	AGTTTATACCCACTCTGGTC	CCTAAGGTTTGCGAAAGTTC	BG	F	9	1	Low GC NAT	his3	Other
1601		BG70	individual barcode	CAGL0J01595g	YPR015C	YPR015c	AGTTTATACCCACTCTGGTC	CCTAAGGTTTGCGAAAGTTC	BG	F	10	1	Low GC NAT	his3	Other

## Sheet: BarcodesSequences
Barcode sequences used for signature tags labeled with TS
						Unique barcode sequences used to label C. glabrata deletion strains with a unique signature tag. 2 x 96 upstream and downstream barcodes are reused for every set of 96 gene deletion strains and can be amplified from the constant regions (U1 + U2; D1 + D2). Barcode sequences from the systematic S. cerevisiae gene deletion project were adopted (http://www-sequence.stanford.edu/group/yeast_deletion_…
well	UPTAG	Sequence Uptag 5’-3’	DOWNTAG	Sequence Downtag 5’-3’
A1	BC_UP_A1	5’-CGCCTAAGACCGGATAAAGC-3’	BC_DN_A1	5’-GGGCTCGAGATTTAAACGGC-3’
A2	BC_UP_A2	5’-CGATTCGATAAATGACGCGA-3’	BC_DN_A2	5’-CGGCCTAAGTTTCGGTTCGT-3’
A3	BC_UP_A3	5’-GCTACAAACATAAGTGCGGC-3’	BC_DN_A3	5’-CCGAGTTCTACTAGGTGTTA-3’		Reference strain barcodes: The reference strain contains the following barcodes to be tracked as a positive control during parallel experiments:	The reference strain is his, leu and trp auxotrophic. TRP1 was deleted with a NAT1 marker flanked with the barcodes listed below
A4	BC_UP_A4	5’-ATCGAACGTGTGTCAAACGC-3’	BC_DN_A4	5’-ATAGCCGACTAACGAGCGTC-3’		uptag 5’-CGATGCAGGTTATAGACGAT-3’	downtag 5’-GGCACTACTCAAGCATCTTA-3’
A5	BC_UP_A5	5’-AAGATAGTCGCCGAACTCGC-3’	BC_DN_A5	5’-AATCGACGCTAACGACTGAG-3’
A6	BC_UP_A6	5’-ATCGAGCACGTAACCGTTGC-3’	BC_DN_A6	5’-ATATGATACTCACGACCCGG-3’
A7	BC_UP_A7	5’-AATGTCGCGTAATGGCTTAG-3’	BC_DN_A7	5’-ACCTTATGTGTAATGAGCGG-3’		Constant and overlap sequences, flanking unique barcodes:
A8	BC_UP_A8	5’-AGGCAGATACGATTAGTACG-3’	BC_DN_A8	5’-AAGTCTATATCAGTAGCGGG-3’		U1 overlap	5’-ccgctgctaggcgcgccgtg-3’	(overlap sequence for fusion PCR)
A9	BC_UP_A9	5’-AAGCATCGTTAAGGCTGCCG-3’	BC_DN_A9	5’-ATTGGTCAGCGAGCCCTACT-3’		U2 marker	5’-cgtacgctgcaggtcgac-3’	(amplification of marker + addition of barcode)
A10	BC_UP_A10	5’-ATAGATGACTACCGCGTCCG-3’	BC_DN_A10	5’-ACTTGAGGCGTAGACCTGCT-3’
A11	BC_UP_A11	5’-AATCGACTGTAAGTATCGCG-3’	BC_DN_A11	5’-AACGTGGGATCACTCGTGCT-3’		D1 overlap	5’-gcagggatgcggccgctgac-3’	(overlap sequence for fusion PCR)
A12	BC_UP_A12	5’-ATAGCCTTCTAAGAGCGGCG-3’	BC_DN_A12	5’-AATCGGCGCTCACGCTTAGT-3’		D2 marker	5’-ctacgagaccgacaccg-3’	(amplification of marker + addition of barcode)
B1	BC_UP_B1	5’-ATCGGCCTGTAATCGGATCG-3’	BC_DN_B1	5’-ACGATTGCGCGATTCGAGTT-3’
B2	BC_UP_B2	5’-AATTAGCACTGACGGCCTCG-3’	BC_DN_B2	5’-ATGCGACCTTGTGGCAATTT-3’
B3	BC_UP_B3	5’-ATAGTTCCCGCAGCTCGTTG-3’	BC_DN_B3	5’-CGCCGTGTGAAACATACTAA-3’
B4	BC_UP_B4	5’-ACAGCTATTAGGACGTGTTG-3’	BC_DN_B4	5’-ATGACGGATGTATGACGACT-3’
B5	BC_UP_B5	5’-AGTAGTACAGCCCGCGTCAT-3’	BC_DN_B5	5’-CCCATTAGTCGCAAGAGTTA-3’
B6	BC_UP_B6	5’-ATGCCCGAGTTGTCGCCATT-3’	BC_DN_B6	5’-CGCGTTATGCAATACGGTTA-3’
B7	BC_UP_B7	5’-CCGCGTCGTAAATGATTAGA-3’	BC_DN_B7	5’-ATACACCGGCATAATCTGTC-3’
B8	BC_UP_B8	5’-CGCCCGAACGGAAGATATGA-3’	BC_DN_B8	5’-ATGTACCGAGCATTGCACGG-3’
B9	BC_UP_B9	5’-CCATATTTGCGAAGGTCGGC-3’	BC_DN_B9	5’-CGCATTCAGTACATTTACCG-3’
B10	BC_UP_B10	5’-CGGATATGTACTAATTGGGC-3’	BC_DN_B10	5’-CCGCGTCTAGTATAGTATGT-3’
B11	BC_UP_B11	5’-CGGCCTAACTGTAATTGATC-3’	BC_DN_B11	5’-CTCGACGCTGGACGTTATGT-3’
B12	BC_UP_B12	5’-CCCTGTTATGAACCTTGATC-3’	BC_DN_B12	5’-CGCTTCGAGTATGGGATATT-3’
C1	BC_UP_C1	5’-CGCGCAGAGGTTAGATAAAT-3’	BC_DN_C1	5’-CTGTACGTGCGATACTCGTT-3’
C2	BC_UP_C2	5’-CGACCCTGATGATCCTTTAT-3’	BC_DN_C2	5’-GCCTATACCCAACTAATGGA-3’
C3	BC_UP_C3	5’-CGGACGGTATTCATTCATCT-3’	BC_DN_C3	5’-GCCGAACCTTCAACAGAGTA-3’
C4	BC_UP_C4	5’-GTGAGCGAAACACCGCGTAA-3’	BC_DN_C4	5’-GCGTGTGAATAATACGGAAC-3’
C5	BC_UP_C5	5’-GTGCGAACCAACGTACTACA-3’	BC_DN_C5	5’-GGTCGATAATAACACGCCAC-3’
C6	BC_UP_C6	5’-GGGTACTCCACAACATTACA-3’	BC_DN_C6	5’-GAAGTACGCTCAAGACCGAC-3’
C7	BC_UP_C7	5’-GCTAATCGCTAATTCGTTCC-3’	BC_DN_C7	5’-GCGACCCTATAATTCTTGAC-3’
C8	BC_UP_C8	5’-GCATTAACGGGAACTAGAGC-3’	BC_DN_C8	5’-GTTAGGTCCATCCGCCATTG-3’
C9	BC_UP_C9	5’-GCCATTCGTATAACCGTGTC-3’	BC_DN_C9	5’-GCGAGACCGCTTTACCAGAT-3’
C10	BC_UP_C10	5’-GATTATACGCTATCCGAGGT-3’	BC_DN_C10	5’-GACTCCGTACTCACTAGGAT-3’
C11	BC_UP_C11	5’-GTATTCCGACTGCGGCACTT-3’	BC_DN_C11	5’-TCGGTTAGAACAGTAGAGAC-3’
C12	BC_UP_C12	5’-TAATACCCGATCACTGGTGG-3’	BC_DN_C12	5’-TACACTCGACGACACGGTAG-3’
D1	BC_UP_D1	5’-AAATTGGTCGTAATGCGTCG-3’	BC_DN_D1	5’-TATGTCGGACGCCGTAGACT-3’
D2	BC_UP_D2	5’-ATTACGAGGTACGCGCTTCG-3’	BC_DN_D2	5’-TTTGCGTACTGAGGACCGCT-3’
D3	BC_UP_D3	5’-ATTACCTAGTCGGAGACAGG-3’	BC_DN_D3	5’-TATCAGTTCCGCAGACGGGT-3’
D4	BC_UP_D4	5’-ATTAGCGTCTCGACTACCTT-3’	BC_DN_D4	5’-ACGGACCTTGTACGCGATCT-3’
D5	BC_UP_D5	5’-ACCGACGGCTTAGCGATCTT-3’	BC_DN_D5	5’-ACCCGAGCGTTGATAATTCT-3’
D6	BC_UP_D6	5’-ACTAGATACACATGCGTGCC-3’	BC_DN_D6	5’-ATTATCCTTAGGCGCGGCGT-3’
D7	BC_UP_D7	5’-CCGACCGTATAAGTTCTATC-3’	BC_DN_D7	5’-AATTCGTATGCACCGGGCGT-3’
D8	BC_UP_D8	5’-CCGTTATACGAATATCGACC-3’	BC_DN_D8	5’-CCCGGTACTACAATACGAGA-3’
D9	BC_UP_D9	5’-CAGAGTAAGTAACGGTTCGC-3’	BC_DN_D9	5’-ATCGCGCAGGTCGGACATAT-3’
D10	BC_UP_D10	5’-CCGGCTAGTTAATTTGACTC-3’	BC_DN_D10	5’-GGCTCCACTAAATAGACGCA-3’
D11	BC_UP_D11	5’-GGCTAACCGAAACCGTGACA-3’	BC_DN_D11	5’-TCATAGCCAACACAGGGCGA-3’
D12	BC_UP_D12	5’-GGTGTACCTCCAACTTACTA-3’	BC_DN_D12	5’-GCTCCTAGAGTATGAGAGAT-3’
E1	BC_UP_E1	5’-TAGTGACTTAGACCCTCCGT-3’	BC_DN_E1	5’-ATTGCGACCTCGTCATGGCT-3’
E2	BC_UP_E2	5’-TATAGTTCGGGCCATACGGT-3’	BC_DN_E2	5’-GGTATTCCATAATCGCTCTC-3’
E3	BC_UP_E3	5’-TAAGGCGTCGTCACTACGGT-3’	BC_DN_E3	5’-TCTATTAGTGGACAGTACGG-3’
E4	BC_UP_E4	5’-TTACTTGCCCGAGCCGGATT-3’	BC_DN_E4	5’-CACCCGAGTTACGATCAAAT-3’
E5	BC_UP_E5	5’-TATTAGTGCGGACCCGGCTT-3’	BC_DN_E5	5’-CGGGAGGATTTATACTCAGT-3’
E6	BC_UP_E6	5’-TTCTACCGTCGGAGGCAGTT-3’	BC_DN_E6	5’-TTACGACCAGAACGGGACAC-3’
E7	BC_UP_E7	5’-TTTAGTGTCCGCGCCACGTT-3’	BC_DN_E7	5’-TATACTTGCGTAACGGGCCG-3’
E8	BC_UP_E8	5’-TATTCTCCGTGACGCGGGTT-3’	BC_DN_E8	5’-AATTTAGGTGCGACCGCCCT-3’
E9	BC_UP_E9	5’-AATCGGTACTAAGTCGGTTC-3’	BC_DN_E9	5’-CGGGTGTAGAAACCGACTAA-3’
E10	BC_UP_E10	5’-CCCGATTGGTTAATACCGAT-3’	BC_DN_E10	5’-AAGAAGGTTTAATTCGCCCG-3’
E11	BC_UP_E11	5’-GGACCGACTATTCCCTAAAT-3’	BC_DN_E11	5’-GCGCGGTCAGAACTAATATA-3’
E12	BC_UP_E12	5’-GCGCTGCAATCAGAAAGGTA-3’	BC_DN_E12	5’-CCAATGTACGCCAAGGTATA-3’
F1	BC_UP_F1	5’-AGCATGTCTCTAACTGGACG-3’	BC_DN_F1	5’-TCTATTCGGCGAGGCTGACT-3’
F2	BC_UP_F2	5’-ATATAGCGTGACAGAGTACG-3’	BC_DN_F2	5’-AAGTCAGGTCAATCATGCCC-3’
F3	BC_UP_F3	5’-ATATACGTGGAATGACTGGC-3’	BC_DN_F3	5’-TGACTCCTACGAGGTGCGAT-3’
F4	BC_UP_F4	5’-ACATGGTTGAAAGCGCGTCA-3’	BC_DN_F4	5’-TATGACTGCGGACGTTCGCT-3’
F5	BC_UP_F5	5’-CGACTATTGTGACATACCTG-3’	BC_DN_F5	5’-ACGTTGATCGCATGAGATTG-3’
F6	BC_UP_F6	5’-TGGATTCGACTCGCTCGCAT-3’	BC_DN_F6	5’-CATTACGTCAGATAGGGCTG-3’
F7	BC_UP_F7	5’-ATTTCGGCACGCTCACGATG-3’	BC_DN_F7	5’-TAACGCGACAGACGATATGC-3’
F8	BC_UP_F8	5’-GAGCTTGACTCACCGTCTTG-3’	BC_DN_F8	5’-TAACTCGTACTAGCGATCTG-3’
F9	BC_UP_F9	5’-GCGGCGGATATGCTATAAAT-3’	BC_DN_F9	5’-AATAGAGACGGCTCGATCTG-3’
F10	BC_UP_F10	5’-TACTCGGCAACAGGTCGGTA-3’	BC_DN_F10	5’-ATTCTCGATAGAGCGTGCTG-3’
F11	BC_UP_F11	5’-TATGGCACCACACGAAGGAC-3’	BC_DN_F11	5’-GACGCGAGTCGATGATACCT-3’
F12	BC_UP_F12	5’-GGGCTACCTCTCAATTATAC-3’	BC_DN_F12	5’-CGCTCCTAAGACATTGTTAC-3’
G1	BC_UP_G1	5’-GCCCACATGGATAACATTAC-3’	BC_DN_G1	5’-CGTAATAAGTGGGTAGAACC-3’
G2	BC_UP_G2	5’-AGACTAAGACCATTGTACCC-3’	BC_DN_G2	5’-GGTAACACTATCTCAAGACC-3’
G3	BC_UP_G3	5’-TAGCCAGTAACAGTAGGCCC-3’	BC_DN_G3	5’-GGTATGACGATAACCCATCC-3’
G4	BC_UP_G4	5’-GCCCAAATAAGACGTGAGCC-3’	BC_DN_G4	5’-AGCACACGTAGGAACTATCC-3’
G5	BC_UP_G5	5’-TAAGAATCGTTAGCAAGGCC-3’	BC_DN_G5	5’-CACGACGTAACATGAGGTCC-3’
G6	BC_UP_G6	5’-AGAGATTCGCTTAACGCCCG-3’	BC_DN_G6	5’-ATTCCGAGCGGCAGCGATAT-3’
G7	BC_UP_G7	5’-CATAAGCGTTGTGAATCGCG-3’	BC_DN_G7	5’-TATACTGCGCGACATGCGAG-3’
G8	BC_UP_G8	5’-TGCGCGGTCAAACCAAGCAA-3’	BC_DN_G8	5’-TAATCGCTACGAATGCTACC-3’
G9	BC_UP_G9	5’-TTCACCGAGACAAGGCGAGA-3’	BC_DN_G9	5’-AATAGGACGGAACGCCATCC-3’
G10	BC_UP_G10	5’-TCCATACCGATAAAGCTCGA-3’	BC_DN_G10	5’-ATATACGGGTAACCAGCCGC-3’
G11	BC_UP_G11	5’-TACTGACGCGGGACTGACTT-3’	BC_DN_G11	5’-CGGAGAGACAGATTACACGC-3’
G12	BC_UP_G12	5’-TAACTGCCGCGAGTCGTCTT-3’	BC_DN_G12	5’-AGTATCACACGAGCTTACGC-3’
H1	BC_UP_H1	5’-TATCCTGTCGGAGCGCGTTT-3’	BC_DN_H1	5’-TTAGGTACACTACACGTCGC-3’
H2	BC_UP_H2	5’-ACGGACACGACAGTAGTTCC-3’	BC_DN_H2	5’-CCAGGGCGTGTTCATAAATA-3’
H3	BC_UP_H3	5’-GGGTACATACGCATATTAGC-3’	BC_DN_H3	5’-TCATCCGAGCGACTTAGTGG-3’
H4	BC_UP_H4	5’-AAGCCAAACGAACTTGCGGC-3’	BC_DN_H4	5’-ATACCTTACTCAGCGGGTGG-3’
H5	BC_UP_H5	5’-CCGAGTTAGGAATGTTATGC-3’	BC_DN_H5	5’-TACGGAATTCGTACGTGCTC-3’
H6	BC_UP_H6	5’-TACCTATTGACCAGTGGGCG-3’	BC_DN_H6	5’-TACGGATGTCGACTAACCAT-3’
H7	BC_UP_H7	5’-ATTGAGCCTGACCACATGCG-3’	BC_DN_H7	5’-TAGGTTGAGGCGATCGCGAT-3’
H8	BC_UP_H8	5’-CCTAGAGACGTAGATATGCG-3’	BC_DN_H8	5’-ATACACATCGGGTTAAGCGG-3’
H9	BC_UP_H9	5’-ACACCGTATTTAAGACTGCG-3’	BC_DN_H9	5’-GTTATTACCCTACATCGTCG-3’
H10	BC_UP_H10	5’-ATCTCGCGTGACGATAGGCT-3’	BC_DN_H10	5’-TACCTTAGGAGGCGTAAATG-3’
H11	BC_UP_H11	5’-GATGCGGCACTATCGCTCAT-3’	BC_DN_H11	5’-CAGCGCGTACTAGACTGGAT-3’
H12	BC_UP_H12	5’-AGGAGCTTGTCTAATATCGG-3’	BC_DN_H12	5’-CAGCATTGTAAATAGGCGGA-3’
Individual barcode sequences used for strains labeled BM or BG
Cg ORF	gene name	Nat GC Content	Up tag sequence	Down tag sequence
WT	n/a	n/a	n/a	n/a
CAGL0A01628g	MIG1	High	CCACGAGACGTTTCTAAATC	CTTAGTGCTAGAGTTACGGT
CAGL0A03696g	GAL83	High	CGAGCTTACCAACTACTTGA	CAATCGCAGGTCAGATGATG
CAGL0A04235g	SAS3	High	AAATGCTCTTCAACTACGGC	AGTCTTGAAGTCATCGGAAG
CAGL0A04785g	RTG2	High	TTCTGAGGCCGAGGTCCTTT	AATTCACACCGCCGAGGGTT
CAGL0B00462g	KAR4	High	CAGAGTCTTAAACGCCTGGA	CCACGGATAGAACTGAGGAC
CAGL0B01947g	INO2	High	GAACAACCAAGACGTGTGTC	GACTCCGTACTCACTAGGAT
CAGL0B02651g	MET32	High	TTGTACCCACTAGACGTGCG	TTGAGTGTCCGGCATACCCT
CAGL0B03575g	HAT2	High	GCGCATCACTAAGTTTCATC	ATCGCGCAGGTCGGACATAT
CAGL0B04895g	RFX1	High	AATATGCGGAAACCGGGTCA	ATAGTTGGACCACCGTACTC
CAGL0C00297g	EZL1	High	TATCTGAGCCCAGTGTGCAG	ATAGTGCAGGAACGCTCAGC
CAGL0C01485g	CTI6	High	GAATCCATGCCAACCATTGA	CACGGATTGTTAATGAGCTG
CAGL0C01551g	CUP9	High	CATAGCGGAACATAGCCTTA	CAGCCGAGAGTGTGATACAT
CAGL0C02519g	MIG3	High	AGCATGTGGCATAACCTTTC	CCGTTAGGCAAACATGAGCA
CAGL0C03399g	POP2	High	GCAGTCACGTTCTCGAATCG	CAGACTCAGGTAGCATGTCG
CAGL0C03608g	TUP1-like (not ortholog)	High	TGGGCCACAGAAGCAACTCA	ATCTGGCGACGCTATGACGT
CAGL0C05335g	RTG1	High	ACGCAGTAGCGACGATTATG	AATATGAGATGGAGCCACTG
CAGL0C05357g	HST1	High	CTTCGAGCGAGAGTATTATG	ATTGTCACGCGAGTCCACTG
CAGL0D00462g	ASH1	High	GAACCCGCGTCAATAGGTAC	GCTAACCAGAGAGACTTACC
CAGL0D00682g	SFP1-like (not orthologue)	High	ACGCGAGTGTTCATCCGGTT	CACGTCGTTAAAGACCTGGA
CAGL0D01012g	MBP1	High	CCAGTTCGGGAATGTGCTTC	CCGCTATTATTACAGACTGG
CAGL0D01364g	SSN6	High	AGGAGGCCCTGCATTTCCAT	AGCAGGTTAGGCACTTAGCT
CAGL0D02486g	RDS1	High	GGCAGCAGAGTTAATTCATC	AGGTCAGACAGCATTCGCTC
CAGL0D05170g	PHO4	High	GGTAACAGTCGAGACATATC	AGGACCCTGTGAACTGTCTC
CAGL0E00561g	TUP1	High	CGCATCAGTGCAATGGATTA	CACTACTGCGGATGCGATGT
CAGL0E00627g	SRB8	High	TCCATCAGAAGACAGTGTGA	CTACTGGACGTGAGCTGACT
CAGL0E00693g	NGG1	High	GATTATACGCTATCCGAGGT	TAAGGTGCGGCAACGTCTAC
CAGL0E01331g	SWI5	High	GCGGTCGATACATTTCTAAG	GAGCGACTCCGATTCGTACT
CAGL0E02079g	MSN1	High	TATTCGATCTCCAGCGAGGG	AGACTACCTCAACCTTATGG
CAGL0E02475g	SIN3	High	ATACTCTGCGAAGCGGTAGC	GAGCATACACCAGTCTTAGC
CAGL0E02805g	HIR1	High	ACACCACATGAAGGGATTCC	AGACTTAGTGAACGTCGCTC
CAGL0E03718g	SNF6	High	TATCGACCTCAGAGTGCGTG	CGGCACAGTATATCAATCAC
CAGL0E04488g	AHC1	High	ATGTACCACTACGCGCTGAG	ATCACTATGGAAGCGGACGC
CAGL0E04884g	ADR1	High	GGATCGCTTAGAGCCTATTT	TCCACGCAGAGGAGTTAAAG
CAGL0E05566g	TYE7	High	ACACTGGAGGAATGCCTAGC	CATAATGGCGAATTGGCGTA
CAGL0F01837g	SPT8	High	TGCGCGGTCAAACCAAGCAA	TGGGAGTACACACACCAGAC
CAGL0F03047g	SIP1	High	ATTACCTGTCCACGGGAGTG	AATTCGTATGCACCGGGCGT
CAGL0F03069g	CAD1	High	AACCTACGGGCATGTTCGTG	AATAGACCTTCATCGGGCGT
CAGL0F05621g	HST4	High	GTTCAGTGCGGACTACTATT	TACCTCTAACCATTTGGAGC
CAGL0F06039g	TSP1	High	AGCATCGGCAGTAATGTAAG	GGAGAGTAGGATGGATGGCA
CAGL0F06237g	MCM1	High	CGATCTTATACATTGCACCG	CCTGGAAACGGAAACTTGAG
CAGL0F06743g	DAL81	High	ATAGGACCCTCACGTTTACG	TACACGGGTGCTAATGTCCG
CAGL0F07315g	SNF4	High	GGCTAACCGAAACCGTGACA	GAATACGTTATCAGGGTCGT
CAGL0F08283g	GCN5	High	AGCATGTCTCTAACTGGACG	TTATATGGGTAAGCCGCCCG
CAGL0F09097g	SKN7	High	TCTGGATCAGTGGACGTAAT	TATGACTGCGGACGTTCGCT
CAGL0G02739g	XBP1	High	CGTGGCATTATCAGTATCCT	CGCAGCATAGCATTAAGTTC
CAGL0G03179g	ASK10	High	GGTTAATCCGAACTACCTAC	GGCCACCGACAATGAAGTCA
CAGL0G03421g	FLO8	High	CCTGATACGCAATGACGATA	TATATTGATCGAGGCTGGCT
CAGL0G04389g	GZF3	High	CATGCTACTGAATCCTATGC	CATCCATGTGAATACAGAGC
CAGL0G05379g	GCR2	High	GCTACACCAACATAGGTTCA	ATATCTGCATCAGGCTGCGG
CAGL0G06556g	PHO23	High	AGAGCTGTCAAACGGTGTAA	AAATGCTAGTCAAGCGGACC
CAGL0G08646g	POG1	Low	GGCTCGCACATATCATAAAC	CATGTATGGGCAGGCTTCCT
CAGL0G08844g	ASG1	Low	AGATATACGACAGACCTCGC	CCCAATGCTAAATGTGCAGA
CAGL0G08866g	FKH1	Low	GATGATAGACCATACCTCGC	TCTCCCGAGCAAGAATCAGA
CAGL0G09042g	AFT2	Low	ATCATTGAGTCAGATCGGTG	CATGGCATTGAAGCTCACTC
CAGL0H02145g	STE12	Low	CACGAGTGCTAAGATTTGAG	ACAGGCATGTGAATTTGTGC
CAGL0H06215g	GAL11-like	Low	AAGATCATGTAACACCGCTC	CCTGTGCAGCAAGACTAATA
CAGL0H06677g	IMP2'	Low	TGATCTCTACGCACTTGCTG	CATATCCACTAAGGTTGCTC
CAGL0H07557g	FZF1	Low	ACGGTATGTAAACCTACGGA	ACTCTCTTGGGATACGGGTT
CAGL0H07711g	RTF1	Low	TTTAGTGTCCGCGCCACGTT	ACCCGTTATGGAGGTGTCTT
CAGL0H07843g	HAP2	Low	TATTAGTGCGGACCCGGCTT	ACCCGAGGAGCGTTAGACTT
CAGL0H08107g	HMS1	Low	GTGTATCATCCCTATCACTG	CCATCCATGAGATATGTGAG
CAGL0H08239g	HST3	Low	ATGCGCTGCTAACTGCTGAG	CATAAGCAGGGCGAATACGC
CAGL0H08866g	HOT1	Low	GCACGCTGACTATACTTCAT	GATTATGACACATCGCGTCC
CAGL0I00968g	HIR2	Low	TCACTGCGGAGCACTTGTTG	TTGCATAGGCCACTCGACTG
CAGL0I04180g	CUP2	Low	GGAGTACACTAACCCTAAGC	TTACTACGGACAGGACGGTC
CAGL0I04246g	SUT1	Low	GAGTTAGGGACACTACCTCC	TTTACGAGGACATACCGGGC
CAGL0I05170g	CST6	Low	ATCATCAGTGTGGAGAATCG	CCATTGATGACAGTGCAGAG
CAGL0I07183g	SFL1	Low	AGATGGCCGCTCCTCAGATT	GCCATAACCAGACAGGCGTA
CAGL0I10769g	MCM1-like	Low	GCCACTGTATTAAGATAGCG	GCGGTACTCTCACTTCATAT
CAGL0J03454g	HDA1	Low	AGAGTCATCCCATTACCTAG	TAGGCTAAGAGTTGCTAACG
CAGL0J03608g	HCM1	Low	TCTACGCTGCGATGATTGGT	TATGTTCACGCATCGCACGG
CAGL0J04400g	HAP3	Low	ATAGTGACGGAACTGTTAGC	AGGACATCTATAACTCCGTC
CAGL0J05060g	ZAP1	Low	CATCGAGTCTAACTTCTCAG	CCATGATATGAACGTAGAGC
CAGL0J06182g	SKO1	Low	ATATGACCGCCCATGCGTAG	CACTAGCTGCAATGAGGTTA
CAGL0J07898g	GIS2	Low	AGATGCACCCAATTCTTCGA	CAGATTGTCAAAGGTTCGCA
CAGL0A00451g	PDR1	Low	CCGTTATACGAATATCGACC	CCGACCGGACTATTAGATAT
CAGL0A03322g	HOS2	Low	TACTGGACGGCACGGTTTAT	AACGGTTGCTAATGTTTCCG
CAGL0A04455g	SEF1	Low	AAGCTCGTCGAATAGTTGGC	AGATTGCCCTAACCGTGCAG
CAGL0B01188g	TOS4	Low	AACTCTTCTAAACTGGCGGA	AAAGCACCTTGAACGGGCTC
CAGL0B01441g	RPD3	Low	ATTGCATTCGCACTTCCGAT	TATGATCGGACACCACGCAG
CAGL0B03421g	HAP1	Low	CGAGCTGTATAAGTTACCAG	CGACCTTGACCCAGTAGATG
CAGL0C02277g	GLN3	Low	CACGATTGTGTAAGAGTCTG	AAGAGTGGATCAACTGGCAC
CAGL0D01430g	HOS1	Low	GATACCAGTCTCACAGATTC	GGATGGCTCACACTTCTTTC
CAGL0D02904g	PPR1	Low	GCCAGCAGTACAAGGCATGA	TGCGGGAGCACAATACCACA
CAGL0D02926g	BRE2	Low	CGAGTCAAGACACTGCATGA	CGCGCATGGAAATTACCACA
CAGL0E03762g	RIM101	Low	TCACTTGCTCAGATGGCGTG	GCATTAGCTCAACTTTGCAC
CAGL0E04312g	STP2	Low	GCCATTATAGCAATCTGCAC	TCCGGTCGCATAGGCTAGAT
CAGL0F00803g	GAL11	Low	GACTGCATCTCAAGTGTTAC	GAGAGAGAGACATCCTCACC
CAGL0F01265g	YAP7	Low	ATTGCCGCGTGCATGGCTAT	CGCGCTCAGTGCATTTCTAT
CAGL0F03025g	ARO80	Low	AGGGTTATTCCACTCTCCTG	ATTATCCTTAGGCGCGGCGT
CAGL0F04081g	TEC1-LIKE	Low	AGAGCCTACCCAGGTCTAAG	TTCAGCCGGACCATTAGCAG
CAGL0F05995g	MSN2	Low	GCGCATAGTATATCAGTCTG	CATCGAGATTACCGCGTCTG
CAGL0F07667g	MSS11	Low	CATCAGACGCGATCATGTGG	GGCAAGGCACGCCAACTATA
CAGL0F07865g	UPC2	Low	GTACTCCGGTTCAGCATGTT	TAGGAGCTACCAGGACCTTC
CAGL0G00704g	SWD1	Low	GGTATGCACTCACATCTATC	AAACACTAGTTGTGCGAGCA
CAGL0G07249g	YOX1	Low	GATGATATGGCATTCCAGTG	ATGGACCTCTACCGCGTATG
CAGL0G08107g	GIS1	Low	GAGACTAAGTTCGGAGAATC	GACCCTTATCCAGTCTTGTG
CAGL0H02959g	TOS8	Low	CGGCAGGTTGTACCAATTTG	GCCGCCGTAACAACGTAGAA
CAGL0H04367g	WAR1	Low	TAGACTAGCACCATACTTGC	TCCACGGCGAGCAGTTTATG
CAGL0H05621g	RLM1	Low	TATGCGCTAACAGGGTTCGC	TGAGTCTTCTAAGCTCTCCG
CAGL0H06875g	ARG81	Low	TCATGGGAAGAAGCAGCCAC	CTCCAGTATGTTAAGAGTGG
CAGL0I02552g	STB5	Low	TTCTCAGAGCTACCGACGTG	TTGCGCGAGCTATTCGGACT
CAGL0I07755g	HAL9	Low	AGCCATGATTTCACATTCGG	CTTATTCATAGAGGCTTGGG
CAGL0I08085g	EMI5	Low	CTATGCGCTAGACGTAGTTG	CATGATGTCAGACGATGTTG
CAGL0J06974g	HOS3	Low	GAGATCATGCCATTCAAGCC	AGGCGATGATGGCATTTACT
CAGL0J07150g	PIP2	Low	TTAGCCGCTCCATGTGCTTG	CGATGATCTAGCATTAGTCG
CAGL0J07942g	SIP3	Low	GCGCTCATAATAAACTCGCA	AGAGGCTTCTCATCCTATCT
CAGL0J10274g	MKS1	Low	ACATACGGTAAAGCTGTGGA	AATGAGCGTCAAGATTTCCC
CAGL0J10472g	SSN2	Low	AAATTCCGCTGCGTCAGGGT	CTCGGACGAACAACGGTGAA
CAGL0M13189g	MSN4	Low	AATGCTCGGCAACCGCTTTA	TAAACACCTGGGCAATGCAC
CAGL0K03003g	MOT3	Low	ATCCCATAGTGTTAAGGCGG	TATTCTTGACGCAGCTCGGG
CAGL0K03773g	SAS2	Low	TGGCACTGCACAAGCAAGCA	ACTCTTCGCAGACGGTTTGG
CAGL0K04257g	RME1	Low	CGTAAGTTTGAAGCCCTTTC	CCGGGTCCCAAAGGTACAAA
CAGL0K04543g	SPT4	Low	CTAACGTCTTTGAACTTGGG	GTTTGGGCACAACACACACA
CAGL0K05797g	EMI1	Low	AGCCACTTCGTCCGATTGTT	CCGTACAGTCAAGTAAGGTA
CAGL0K05841g	HAP1-like	Low	CACGTCACCGTATGTAGAGT	CACCAGCCGTGACTGTGTTT
CAGL0K06193g	ADA2	Low	AACGCCTTCTCAGTATGGGT	CTGCGGGCGAAAGTTAATAA
CAGL0K06413g	STP1	Low	ATCAGGACTTCCGCCGAATT	CCTGTTAGGAAACCCAGACA
CAGL0K07161g	SNF4-like	Low	AGTACAGACTCACCCAGTAG	ACTTCAGCTACAGCGTTAGG
CAGL0K07634g	GAT1	Low	ACGACCGTCTAACTATGCAG	AACCACTGCGGACATAGGAG
CAGL0K08624g	HAP4	Low	TGGAATACCCACGAACGGAC	CCATAAGACGTTGTGAAACC
CAGL0K08668g	MET28	Low	GCAGACTTGTGAATCTTACG	TTAGGTCACTACGATCTCCG
CAGL0K08756g	YAP5	Low	GAAACGCTTGTGAAGTTACG	TTAGGATGGACACCTCTCCG
CAGL0K09372g	MIG2	Low	TATAGGTCCCGATACGCCGT	ACCCTTTGAGGAGCGGTAAT
CAGL0K09900g	HAP5	Low	ATACTCAGGCTGGACAGTCG	GATGACATTCCACGTTCTGC
CAGL0K11396g	SIR4	Low	TGCGCCCTAAACAGCTTAAA	TACACTCGACGACACGGTAG
CAGL0K11902g	LYS14	Low	GCGCACATTAAACTTACCGA	GAAGGATCTCGAACACCTAC
CAGL0K12540g	HAC1	Low	GTGAGCTAATACTCGATCAG	CATATCACTCGACATTGGAG
CAGL0L01001g	NOT3	Low	TATATGTGCATCCACCATCG	AGTATGCACGCCACTCAGAG
CAGL0L01903g	RGT1	Low	CATGGATCAACAGCCGCTTA	TGTCCACACAGGTAGAACAC
CAGL0L02123g	SNF5	Low	GCCGACTGGAAACTCATACA	ATGACGGATGTATGACGACT
CAGL0L02585g	BAS1	Low	ACTATTCAGCCATGAGCGCG	CCTGATGCTACATAGTATCG
CAGL0L02739g	SAS5	Low	GGCGATCACAGACATTAACC	GACCGATATTCATAAGCCTC
CAGL0L03157g	DAL80	Low	TATGATGAGACACCGACGCC	GTACAGAAAGAAGCCTCTCC
CAGL0L03377g	SIP4	Low	TATGGCGTCTCAGCGTCTCT	TATGTCTCGCCAGCGTTGTG
CAGL0L03916g	AZF1-LIKE	Low	ACGAGACCATAAGTTCTTCC	CGGAGAGACAGATTACACGC
CAGL0L04400g	YRR1	Low	GCGCAGTATTCATAACTCTC	GTGCCTTATCAGCAAACAAC
CAGL0L04576g	YRM1	Low	TGCGAGCGACTACTTGGCAT	GCGCTCGGATAACATAACAC
CAGL0L05412g	ASF1	Low	AGGCACACGGCACTATATGC	CAGCATGTAGAACGACGGAC
CAGL0L06028g	GTS1	Low	GGTTATTATCACTACCCACG	TTGGGACCCTCCATACTAGG
CAGL0L06842g	THI3	Low	CGCCTATCTATAATACCGAG	CCCTACGACTTATATCAGTG
CAGL0L07436g	PHO2	Low	CTACTACGATGGCGTCGAAT	CCGCGTCTAGTATAGTATGT
CAGL0L08668g	HST2	Low	TACACGCTCACAGGTACTAG	TACATTTGCCCACTGGCTGG
CAGL0L09042g	HAT1	Low	TCAGCTCGGTAACTTGCACG	TCCTTACAGTGGATGGAATG
CAGL0L09339g	HAA1	Low	AACAGATAGTTGAACGGGTC	AGCCAGCGTACATTATCTTC
CAGL0L09383g	SUT2	Low	CTATACCAAACATACGGGTC	TAAGGACGGCTAACCTCTTC
CAGL0L09691g	PUT3	Low	CCGATATTTCCAAGGCTGTA	GTGCCCTAATACAGATCAAC
CAGL0L11704g	SPT2	Low	CCACTTGTGAAAGCTGTAGA	TACGAGCGACTCAGATACGG
CAGL0L11770g	CHD1	Low	CGGCATTAGCAATACCGATA	GCACTTTACATAGACTACGG
CAGL0L11880g	RPH1	Low	GCGGCATCATAATTCTACAC	CTCTTTAACTGCCATTACGG
CAGL0L12562g	MET31	Low	TTACCAGCCATCAGGCGAAG	TATATCTTGCCCAGTGGCGG
CAGL0L12650g	SSN3	Low	TCTAGTATGACAGAGGGTTC	TATGTTCTGACAGCCTCCGG
CAGL0L12782g	DIG1	Low	TATAGAGGAGGACAGACTTC	TATATGTCGAGCCACCACGG
CAGL0L13090g	NDT80	Low	ATTGCATGTCAAGGCAGCCC	GCTCAGCATCAAGCACATTA
CAGL0M00286g	HIR3	Low	GCGGCGGATATGCTATAAAT	GCTCGACTATGCCTTCAGGT
CAGL0M00594g	ZMS1	Low	GCGCAAATAAAGATGTCGTG	GATGCGCCCTCAGTTTGTCT
CAGL0M01254g	STE12-LIKE	Low	GGACGTAAGCGCATATTATC	ATGCTACAGGCACCAGAGTC
CAGL0M01540g	SPT3	Low	ATTACCTAGTCGGAGACAGG	ACCCGAGCGTTGATAATTCT
CAGL0M01716g	TEC1	Low	ATGCTACGGCCACTAGGTTG	ACCTGAGTTAGAGGATGACT
CAGL0M02563g	UME1	Low	CTCAGCCGAGTATATTGACT	GATGCACATTAAGGCTTGTC
CAGL0M02585g	SPP1	Low	GATCGGCATCTAGCTTGACT	GCACGCTGCATACATTTGTC
CAGL0M02651g	RDS2	Low	ACTGGTACGTGATCTGATGT	CAGTCTATACCATCTGCTAG
CAGL0M02739g	TAF14	Low	GCGTGACTGAAACAGCACCA	AATATCTACTGAGAGAGCGG
CAGL0M03025g	CAT8	Low	GCGATTGGAACACATGAGAC	TATAGCCAGACATCAGCAGC
CAGL0M03927g	STB1	Low	AGACTGACGCAAGGCACCTA	GAGTCCCTGGCATCTGATCT
CAGL0M04015g	DAL82	Low	GCCCAGTATGTAAATGTCGA	AGCTACTCTGCATTCTCGAT
CAGL0M04323g	ACE2	Low	TCCACGTCCTCAGGTATTGT	AAGGTCGGTCAAGTCTATCC
CAGL0M06325g	SMP1	Low	AGTATTCGGCTCCACAGCGT	ACGGCGCTTGTCATCTCGTT
CAGL0M06699g	SDS3	Low	TCCGCATAGAGATTACAGAG	CAACATAAGCCAGTGGGAGC
CAGL0M06831g	CRZ1	Low	GGGTACTTCACCATTCCTAG	CACACGGCATGGGATTAACG
CAGL0M06875g	SSN8	Low	CCTTAGATACCATTGCCTAG	GCTGACCATTGATCGTAACG
CAGL0M06919g	FAP1	Low	AGGACGCTCTCTAAGCCTAG	GTATCGAAGGCCGTCTAACG
CAGL0M07634g	SOK2	Low	GCGCCGACCACAGAATGATA	GGCTCTAACAGACCCGATCT
CAGL0M08800g	YAP6	Low	TGAGTTCGTACACCTCGTCG	TAGGGCGTTCCATCTTGCCT
CAGL0M09042g	IME1	Low	GCTGTAATCGCTTGTAATGG	GAGGCTGATCGACTTCCACT
CAGL0M09405g	RTG3	Low	AGTCTACCCACATGCTTTAG	ATTCATCGGACACTTGCCGG
CAGL0M09955g	SFP1	Low	AGGAACAGACCATCTACTGC	CTACACGATGCACAGTAATC
CAGL0M10087g	YAP3-like	Low	AAGGATGTCTAACACTCTCC	ATATGGGTGGAAGCTCCCTC
CAGL0M11440g	CHA4	Low	TCGGCCCACAGGCATAAAGA	TCAGACATTACAGGAACTCC
CAGL0M12298g	OAF1	Low	GATGACAGTACAGTTGACAG	CACTGAGTTAACGGAGTAGT
CAGL0H03575g	SPO1	High	ACGTACAGTTAAGCGACTAG	ATTGATACCCACGCGGAACG
CAGL0J10120g	FKH2	Low	AGAGACTCCCAACGGCTTGA	ACATTGATAACACGGACGCC
CAGL0A00583g	PDR8	Low	GGATGACCACCAGACTAAGC	ATAGGATTAGCACACCGCGC
CAGL0D03608g	N/A	Low	ATAAGGCGCTGGAACCCATC	AATTATGGCTAAGCGTCGAG
CAGL0D03850g	RSC3	Low	ATATCCTTGGAAGCCTGGGC	AATGCGACATCTTAACCCAG
CAGL0E00341g	HMRA1	Low	ATACTTGCGGAAGCTACGGC	ATTACATACGCGCTGGGAAG
CAGL0E05434g	TEA1	Low	CAAGCATCCGCAAGTTAGTA	CAGATGGTGAAATCGACTCA
CAGL0E06116g	YPL230W	Low	AAGGTACTGGAAGCTACTGC	AATAGCGCCTAAGGGCTCAG
CAGL0F02519g	YJL206C	Low	TAGTCGTCAGCACGTCTGTG	AATGAGGCTTCACCACTGCG
CAGL0F02783g	SIZ1	Low	ATTCCTACGCCAGTTGTGGG	ATTACTCCGTGAGGCGACGT
CAGL0F05159g	VPS72	Low	ATTACGCGGCGAGTAGCCTT	CCGAATCCTAAAGGGCGAGA
CAGL0F07909g	HAL9	Low	AGCCATGATTTCACATTCGG	CTTATTCATAGAGGCTTGGG
CAGL0F09229g	YER184C	Low	AAGCACATTGTCCTCAAGTC	TGAGACGTTCTGTAACCCGG
CAGL0G09757g	YLR278C	Low	AGTGTTACCACATCGGCAGC	CGGACGACTATAATAATCGC
CAGL0H01683g	YDR520C	Low	AGGGCCGTCTTCTCAGCTTT	CCTTGCCAGGAAGACGAAAC
CAGL0H03751g	RFX1	Low	AATATGCGGAAACCGGGTCA	ATAGTTGGACCACCGTACTC
CAGL0H04213g	YML081W	Low	AATATACTTGAAGGCGTGGC	ATACGAGACCCAGTTCGCAG
CAGL0H04873g	STP3	Low	CGGGAAGATTTATGCAATGC	GGCCGCATTAGTTAGAAATC
CAGL0J04356g	APN2	Low	AATTTCCGCGAAGCGTGAGC	ATGGAGACCCTAGACACGTC
CAGL0J07370g	JJJ1	Low	TGATGCCACGTCACCAGTAG	ACACTGCGGCAAGAGCGTTA
CAGL0J10296g	APJ1	Low	ACAGGAGTACAACTTCTGGA	AAGGACTGTCAATCATTCCC
CAGL0K02145g	YER130C	Low	ATCCAGCCAGAGTGGTCAAG	GGATCATCATCAATGTCCAC
CAGL0K02343g	YPR022C	Low	CCTAAGTCTACAGAGATGTC	TGTCGCTGAAGACTTAGTTC
CAGL0K04631g	YGR067C	Low	CCCGAGGTTACATTATTTGG	TTGCCAGCGCACAAATGACA
CAGL0K04697g	STP4	Low	CCGTGCTACTAATGTAAGTC	CTATATTTATGGACAGCGGG
CAGL0K06985g	YBR239C	Low	ACACCTGAGTAGGCGCGATT	CCGGCTGCTAAATACTAACA
CAGL0K12078g	NRG1	Low	GCAGAACGTAAAGCCCTCGA	GCGACCACATAAGTCTTTAC
CAGL0L00583g	YPL230W	Low	GCGCATAGACGAGCATAAGC	AGTCGCGCTGTCCATTTGCT
CAGL0L03674g	YJL103C	Low	ATATCACGCTCGACAGTGCG	CGCTGGAACGTATATTATGC
CAGL0L04290g	NFI1	Low	CACGACTGTGAACTATCATC	GCCCATCGTGAAGAATGTTA
CAGL0L06072g	YER130C	Low	AGCCTAAGCACACTTTGGGC	AATATGGCCTAATCCTCCAG
CAGL0L06776g	GAT2	Low	AAGACGACGTAAGCCCATGC	AGGAGACGTTGATAACTCAG
CAGL0L07480g	NRG2	Low	ACACTTCTACCATTGGCAGG	ATTACCGCTCCAGTGTGGTG
CAGL0L08162g	SNT1	Low	GATTAGCTCACATACCTTGC	AGAGCAGAGACATTATTCCC
CAGL0M01870g	YPR013C	Low	AATCTTACGGAATCGTCTGC	AATGTAACCGCATGGGTCAG
CAGL0M04983g	MBF1	Low	ATCCCAAGGAGTGGCAAGAC	TCGACCGATTCCAGAGACTG
CAGL0J01595g	YPR015C	Low	AGTTTATACCCACTCTGGTC	CCTAAGGTTTGCGAAAGTTC
