# Supplementary material for: Systematic Phenotyping of a Large-Scale Candida glabrata Deletion Collection Reveals Novel Antifungal Tolerance Genes
Source: PLoS Pathog. 2014 Jun 19;10(6):e1004211. doi: 10.1371/journal.ppat.1004211 (PMC4063973; doi:10.1371/journal.ppat.1004211)
Supplement: Table S4 — Summary of the phenotypic screening results of the C. glabrata deletion collection. The table shows all deletion mutants obtained and their corresponding phenotypes. For heat stress, CF, CR, CW and NaCl data the degree of growth inhibition was scored from 5 (wild type) to 0 (no growth). For azole and AmB the phenotypes were classified from 0 (wild type) to 3 (severe defect). (XLSX) [file ppat.1004211.s013.xlsx]

## Sheet: Overview_screening
Table S4: Summary of the phenotypic screening results of the C. glabrata deletion collection.
CgORF	Gene	AmpB sensitivity	Azole sensitivity	42°C	Congo Red	Caspofungin	Calcofluor White	NaCl	Fitness	Biofilm formation	Morphology phenotype
CAGL0A00143g	MPC54	0	0	5	5	5	5	5	no	no	no
CAGL0A00451g	PDR1	0	3	5	5	5	5	5	no	no	no
CAGL0A00583g	PDR8	0	0	5	5	5	5	5	decreased	no	no
CAGL0A01133g	MDL2	0	0	5	5	5	5	5	no	no	no
CAGL0A01452g	CWH41	1	2	0.5	5	5	0	5	decreased	no	yes
CAGL0A01584g	AGA2	0	0	5	5	5	5	5	no	no	no
CAGL0A01628g	MIG1	0	0	5	5	5	5	5	no	increased	no
CAGL0A01892g	DAT1	0	0	5	5	5	5	5	decreased	no	no
CAGL0A02299g	CTF4	0	0	5	5	5	5	5	no	no	no
CAGL0A02431g	YPS7	0	0	5	5	5	5	5	no	no	no
CAGL0A02486g	SBE2	0	0	5	5	5	5	5	no	no	no
CAGL0A03322g	HOS2	0	0	5	5	5	5	5	no	no	no
CAGL0A03410g	MLH1	0	0	5	5	5	5	5	no	no	no
CAGL0A03476g	SMF3	0	0	5	5	5	5	5	no	no	no
CAGL0A03586g		0	0	5	5	5	5	5	no	no	no
CAGL0A03696g	GAL83	0	0	5	5	5	5	5	no	no	no
CAGL0A04081g	SRP40	0	0	5	5	5	5	5	no	no	no
CAGL0A04235g	SAS3	0	0	5	5	5	5	5	no	no	no
CAGL0A04411g	SKT5	0	0	5	5	5	5	5	no	no	no
CAGL0A04455g	SEF1	0	0	5	5	5	5	5	no	no	no
CAGL0A04587g	RHK1	0	0	2	3.5	5	5	5	no	no	no
CAGL0A04609g	LST4	0	0	5	5	5	5	5	no	no	no
CAGL0A04763g	FRE7	0	0	5	5	5	5	5	no	no	no
CAGL0A04785g	RTG2	0	0	3	5	5	5	5	no	no	no
CAGL0B00440g	UTP14	0	0	5	5	5	5	5	no	decreased	no
CAGL0B00462g	KAR4	0	0	5	5	5	5	5	no	no	no
CAGL0B00528g	LRE1	0	0	5	5	5	5	5	no	no	no
CAGL0B00572g	DSF2	0	0	5	5	5	5	5	no	no	no
CAGL0B00858g	STE50	0	0	3	2	3	5	0	no	no	no
CAGL0B00968g	FUS1	0	0	5	5	5	5	5	no	no	no
CAGL0B01188g	TOS4	0	0	5	5	5	5	5	no	no	no
CAGL0B01441g	RPD3	0	0	5	4.5	0.5	5	5	decreased	no	no
CAGL0B01947g	INO2	0	0	3	4	3	5	5	no	no	no
CAGL0B01969g	ECM18	0	0	5	5	5	5	5	no	no	no
CAGL0B01991g	SWF1	0	0	4	4	4	5	5	no	no	no
CAGL0B02211g	CCH1	0	0	5	2	0	5	5	no	decreased	no
CAGL0B02475g	PHO84	0	0	5	5	5	5	5	increased	no	no
CAGL0B02651g	MET32	0	0	5	5	5	5	5	no	no	no
CAGL0B03223g		0	0	5	5	5	5	5	no	no	no
CAGL0B03355g	DPB3	0	0	5	5	5	5	5	no	no	no
CAGL0B03421g	HAP1	0	2	5	5	5	5	5	no	no	no
CAGL0B03575g	HAT2	0	0	5	5	5	5	5	no	no	no
CAGL0B04059g	TES1	0	0	5	5	5	5	5	no	no	no
CAGL0B04147g	DBF20	0	0	5	5	5	5	5	no	no	no
CAGL0B04389g	CHS3	0	0	5	5	5	5	5	no	no	yes
CAGL0B04521g	RAS1	0	0	5	5	5	5	5	decreased	no	no
CAGL0B04565g	KTR1	0	0	5	5	5	5	5	no	no	no
CAGL0B04631g	INP53	0	0	5	5	5	5	5	decreased	no	no
CAGL0B04895g	RFX1	0	0	5	5	5	5	5	no	no	no
CAGL0C00297g	SET2	0	0	5	5	5	5	5	decreased	no	no
CAGL0C00583g	SHE3	0	0	5	5	5	5	5	no	no	no
CAGL0C00693g	CCC1	0	0	5	5	5	5	5	no	no	no
CAGL0C00781g	RDH54	0	0	5	5	5	5	5	no	no	no
CAGL0C00803g	MET31	0	0	5	5	5	5	5	no	no	no
CAGL0C00869g		0	0	5	5	5	5	5	increased	no	no
CAGL0C01111g	PPZ1	0	0	5	5	5	5	5	no	no	no
CAGL0C01463g	TCO89	0	0	5	5	5	5	5	no	no	no
CAGL0C01485g	CTI6	0	0	5	5	5	5	5	no	no	no
CAGL0C01551g	CUP9	0	0	5	5	5	5	5	no	no	no
CAGL0C02211g	UTR2	0	0	5	5	5	5	5	no	no	no
CAGL0C02277g	GLN3	0	0	5	5	5	5	5	no	no	no
CAGL0C02343g	ARB1	0	0	5	3	5	4	3	no	no	no
CAGL0C02365g	MET4	0	0	5	5	5	5	5	no	no	no
CAGL0C02519g	MIG3	0	0	5	5	5	5	5	no	no	no
CAGL0C02717g	SPO7	0	0	5	5	5	5	5	increased	no	no
CAGL0C02739g	FUN14	0	0	5	5	5	5	5	no	no	no
CAGL0C02761g	ERP4	0	0	5	5	5	5	5	no	no	no
CAGL0C02915g	DAL80	0	0	5	5	5	5	5	no	no	no
CAGL0C03311g	COG1	0	0	5	5	5	5	5	no	no	no
CAGL0C03333g	FRE6	0	0	5	5	5	5	5	no	no	no
CAGL0C03399g	POP2	0	0	0	3	0.5	5	5	no	no	no
CAGL0C03608g	TUP1-like (not ortholog)	0	0	5	5	5	5	5	no	no	no
CAGL0C03872g	TIR3	0	0	5	5	5	5	5	no	no	no
CAGL0C04048g	MNT3	0	0	5	5	0	5	5	no	no	no
CAGL0C05335g	RTG1	0	0	4.5	3.5	2.5	5	5	decreased	no	no
CAGL0C05357g	SIR2	0	0	5	5	5	5	5	decreased	no	no
CAGL0C05401g	NMA1	0	0	5	5	5	5	5	no	no	no
CAGL0C05599g	LRG1	0	0	5	5	5	5	5	no	no	no
CAGL0D00220g	ECM1	0	0	5	5	5	5	5	decreased	no	no
CAGL0D00242g	CNE1	0	0	0	1.5	5	5	5	decreased	no	no
CAGL0D00396g	PSF2	0	0	5	5	5	5	5	no	no	no
CAGL0D00462g	ASH1	0	0	5	5	5	5	5	no	no	no
CAGL0D00682g	SFP1-like (not orthologue)	0	0	5	5	5	5	5	no	no	no
CAGL0D01012g	MBP1	0	0	5	5	5	5	5	decreased	no	no
CAGL0D01034g	PSA1	0	0	3	1	1	1.5	5	decreased	no	no
CAGL0D01210g	ROK1	0	0	5	5	5	5	5	no	no	no
CAGL0D01364g	SSN6	0	0	2.5	4.5	2.5	5	5	decreased	no	no
CAGL0D01430g	HOS1	0	0	5	5	5	5	5	no	no	no
CAGL0D01496g	ISA2	0	0	5	5	5	5	5	no	no	no
CAGL0D01694g	SMK1	0	0	5	5	5	5	5	no	no	no
CAGL0D01892g	AAT2	0	0	5	5	5	5	5	no	no	no
CAGL0D01936g	SNF7	1	0	5	5	2	5	5	no	no	no
CAGL0D02244g	MEK1	0	0	5	5	5	5	5	no	no	no
CAGL0D02442g	LEM3	0	0	5	5	5	5	5	decreased	no	no
CAGL0D02486g	RDS1	0	0	5	5	5	5	5	no	no	no
CAGL0D02530g	EGT2	0	0	5	5	5	5	5	no	no	no
CAGL0D02750g	MYO2	0	2	0.5	2.5	3	5	5	no	no	no
CAGL0D02794g	WSC4	0	0	5	5	5	5	5	no	no	no
CAGL0D02882g	SSK1	0	0	5	5	5	5	5	no	no	no
CAGL0D02904g	PPR1	0	0	5	5	5	5	5	no	no	no
CAGL0D02926g	BRE2	0	0	5	5	5	5	5	decreased	no	no
CAGL0D03146g	SYS1	0	0	1	5	5	5	5	no	no	no
CAGL0D03256g	YEH2	0	0	5	5	5	5	5	no	no	no
CAGL0D03608g	N/A	0	0	5	5	5	5	5	no	no	no
CAGL0D03674g	NEW1	0	0	5	5	5	5	5	no	no	no
CAGL0D03850g	RSC3	0	0	5	5	5	5	5	no	no	no
CAGL0D04840g	PSP1	0	0	5	5	5	5	5	no	no	no
CAGL0D05104g	KAR3	0	0	5	5	5	5	5	no	no	no
CAGL0D05170g	PHO4	0	0	5	5	5	5	5	decreased	no	no
CAGL0D05434g	ROX1	1	0	5	5	5	5	5	no	no	no
CAGL0D05654g	SDS23	0	0	5	5	5	5	5	no	no	no
CAGL0D06204g	RIM8	0	0	5	5	5	5	5	no	no	no
CAGL0D06424g	ACO1	0	0	5	5	5	5	5	no	no	no
CAGL0D06446g	STT4	0	0	5	5	5	5	5	decreased	no	no
CAGL0D06512g	CDC25	0	0	5	5	5	5	5	no	no	no
CAGL0D06534g	SRB4	0	0	5	5	5	5	5	no	no	no
CAGL0D06622g	SPA2	0	0	5	5	5	5	5	no	no	no
CAGL0D06666g	TPK2	0	0	5	5	5	5	5	no	no	no
CAGL0E00165g	CYC2	0	0	5	5	5	5	5	no	no	no
CAGL0E00341g	HMRA1	0	0	5	5	5	5	5	no	no	no
CAGL0E00385g	MDL1	0	0	5	5	5	5	5	no	no	no
CAGL0E00561g	TUP1	0	0	5	5	5	5	5	decreased	no	no
CAGL0E00627g	SRB8	0	0	5	5	5	5	5	no	no	no
CAGL0E00693g	NGG1	0	0	5	5	5	5	5	no	no	no
CAGL0E01331g	SWI5	0	0	5	5	5	5	5	no	no	no
CAGL0E01353g	ZRT2	0	0	5	5	5	5	5	no	no	no
CAGL0E01375g	MUK1	0	0	5	5	5	5	5	no	no	no
CAGL0E01419g	YPS3	0	0	5	5	5	5	5	no	no	no
CAGL0E01683g	MCK1	0	0	5	5	5	5	5	no	no	no
CAGL0E01705g	MDH2	0	0	5	5	5	5	5	no	no	no
CAGL0E01771g	YPS6	0	0	5	5	5	5	5	no	no	no
CAGL0E01859g	YPS1	0	0	5	5	5	5	5	no	no	no
CAGL0E02079g	MSN1	0	0	5	5	5	5	5	no	no	no
CAGL0E02211g	CBS2	0	0	5	5	5	5	5	no	no	no
CAGL0E02321g	PLB3	0	0	5	5	5	5	5	increased	no	no
CAGL0E02475g	SIN3	0	0	5	5	0	5	5	decreased	no	no
CAGL0E02629g	ALG6	0	0	0.5	4.5	4	5	5	no	no	no
CAGL0E02761g	LDB7	0	0	5	5	5	5	5	no	no	no
CAGL0E02783g	SLA1	2	0	5	5	0	5	5	no	no	no
CAGL0E02805g	HIR1	0	0	5	5	5	5	5	no	no	no
CAGL0E02915g	SCW11	0	0	5	5	5	5	5	no	no	no
CAGL0E03069g	HXT8	0	0	5	5	5	5	5	no	no	no
CAGL0E03135g	MDL2	0	0	5	5	5	5	5	no	no	no
CAGL0E03355g	BPT1	0	0	5	5	5	5	5	no	no	no
CAGL0E03454g	IMH1	0	0	5	5	5	5	5	no	no	no
CAGL0E03476g	CDC25	0	0	5	5	5	5	5	decreased	no	no
CAGL0E03498g	SMF1	0	0	5	5	5	5	5	no	no	no
CAGL0E03718g	SNF6	2	0	3	3.5	2	5	5	no	no	no
CAGL0E03762g	RIM101	0	0	5	5	5	5	5	no	no	no
CAGL0E03982g	YBT1	0	0	5	5	5	5	5	no	no	no
CAGL0E04202g	RFX1	0	0	5	5	5	5	5	no	no	no
CAGL0E04312g	STP2	0	0	5	5	5	5	5	decreased	no	no
CAGL0E04488g	AHC1	0	0	5	5	5	5	5	no	no	no
CAGL0E04510g		0	0	5	5	5	5	5	no	no	no
CAGL0E04620g	ECM33	0	0	5	5	5	5	5	no	no	no
CAGL0E04884g	ADR1	0	0	5	5	5	5	5	no	no	no
CAGL0E05434g	TEA1	0	0	5	5	5	5	5	no	no	no
CAGL0E05566g	TYE7	0	0	5	5	5	5	5	no	no	no
CAGL0E05940g	BOP1	0	0	5	5	5	5	5	no	no	no
CAGL0E06006g	MMT2	0	0	5	5	5	5	5	no	no	no
CAGL0E06028g	ALG5	0	0	0.5	3.5	3	5	5	decreased	no	no
CAGL0E06094g	FZF1	0	0	5	5	5	5	5	no	no	no
CAGL0E06116g	YPL230W	0	0	5	5	5	5	5	no	no	no
CAGL0E06248g	RCN1	0	0	5	5	5	5	5	no	no	no
CAGL0E06556g	ISC1	0	0	5	5	5	5	5	decreased	no	no
CAGL0E06578g	MRP13	0	0	5	5	5	5	5	no	no	no
CAGL0E06600g	FLO5	0	0	5	5	5	5	5	no	no	no
CAGL0E06622g		0	0	5	5	5	5	5	no	no	no
CAGL0E06644g	MUC1	0	0	5	5	5	5	5	no	no	no
CAGL0E06666g	MUC1	0	0	5	5	5	5	5	no	no	no
CAGL0F00209g	SEO1	0	0	5	5	5	5	5	no	no	no
CAGL0F00341g		0	0	5	5	5	5	5	no	no	no
CAGL0F00781g	PEX2	0	0	5	5	5	5	5	no	increased	no
CAGL0F00803g	GAL11	0	0	5	5	5	5	5	no	no	no
CAGL0F00913g	PSK2	0	0	5	5	5	5	5	no	no	no
CAGL0F01265g	YAP7	0	0	5	5	5	5	5	increased	no	no
CAGL0F01419g	AUS1	0	0	5	5	5	5	5	no	no	no
CAGL0F01441g	NIF3	0	0	5	5	5	5	5	no	no	no
CAGL0F01463g	TIR1	0	0	5	5	5	5	5	no	no	no
CAGL0F01507g	SLG1	0	1	4	0	0	0	5	decreased	no	no
CAGL0F01837g	SPT8	0	0	4.5	5	3	5	5	decreased	no	no
CAGL0F02079g	SMC1	0	0	3	5	5	5	5	no	no	no
CAGL0F02431g		0	0	5	5	5	5	5	no	no	no
CAGL0F02453g	ECM25	0	0	5	5	5	5	5	no	no	no
CAGL0F02519g		0	0	5	5	5	5	5	no	no	no
CAGL0F02607g	DIT2	0	0	5	5	5	5	5	no	no	no
CAGL0F02717g	PDR15	0	0	5	5	5	5	5	increased	no	no
CAGL0F02783g	SIZ1	0	0	5	5	5	5	5	no	no	no
CAGL0F03003g	HKR1	0	0	5	5	5	5	5	no	no	no
CAGL0F03025g	ARO80	0	0	5	5	5	5	5	no	no	no
CAGL0F03047g	SIP1	0	0	5	5	5	5	5	no	no	no
CAGL0F03069g	CAD1	0	0	5	5	5	5	5	no	no	no
CAGL0F03245g	IRE1	0	0	5	5	5	5	5	no	no	no
CAGL0F03619g	NIP100	0	0	5	5	5	5	5	no	no	no
CAGL0F03641g		0	0	5	5	5	5	5	no	no	no
CAGL0F03883g	GAS3	0	0	5	5	5	5	5	no	no	no
CAGL0F04081g	TEC1	0	0	5	5	5	5	5	no	no	no
CAGL0F04521g	ECM13	0	0	5	5	5	5	5	no	no	no
CAGL0F04741g	CMK2	0	0	5	5	5	5	5	no	no	no
CAGL0F04873g	KRE6	0	0	5	5	5	5	5	no	no	yes
CAGL0F05159g	VPS72	0	0	5	5	5	5	5	no	no	no
CAGL0F05621g	HST4	0	0	5	5	5	5	5	no	no	no
CAGL0F05995g	MSN4	0	0	5	5	5	5	5	no	no	no
CAGL0F06039g	TSP1	0	0	5	5	5	5	5	no	decreased	no
CAGL0F06237g	MCM1	0	0	5	5	5	5	5	no	no	no
CAGL0F06501g	ECM40	0	0	5	5	5	5	5	no	no	no
CAGL0F06545g	RIM9	0	0	5	5	5	5	5	no	no	no
CAGL0F06655g	AVO2	0	0	5	5	5	5	5	no	decreased	no
CAGL0F06677g	GPA1	0	0	5	5	5	5	5	no	no	no
CAGL0F06743g	DAL81	0	0	5	5	5	5	5	increased	no	no
CAGL0F06787g	MND2	0	0	5	5	5	5	5	no	no	no
CAGL0F07315g	SNF4	0	0	5	5	5	5	5	increased	no	no
CAGL0F07579g	CWP1	0	0	5	5	5	5	5	no	no	no
CAGL0F07601g	CWP1	0	0	5	5	5	5	5	no	no	no
CAGL0F07667g	MSS11	0	0	5	5	5	5	5	no	no	no
CAGL0F07755g	CEP3	0	0	5	5	5	5	5	no	no	no
CAGL0F07865g	UPC2	0	0	5	5	5	5	5	no	no	no
CAGL0F07909g	HAL9	0	0	5	5	5	5	5	no	no	no
CAGL0F08019g	PEX21	0	0	5	5	5	5	5	no	no	no
CAGL0F08041g	PFK1	0	0	5	5	5	5	5	decreased	no	no
CAGL0F08283g	GCN5	0	0	4	2.5	3	5	5	no	no	no
CAGL0F08371g	TNA1	0	0	3	2	2	5	4	no	no	no
CAGL0F08723g	MUQ1	0	0	5	5	5	5	5	no	no	no
CAGL0F08833g	MSB2	0	0	4	2	5	5	5	no	no	no
CAGL0F09053g	MNL1	0	0	5	5	5	5	5	no	no	no
CAGL0F09097g	SKN7	0	0	5	5	5	5	5	no	no	no
CAGL0F09229g		0	0	5	5	5	5	5	no	no	no
CAGL0G00242g	YOR1	0	0	5	5	5	5	5	no	decreased	no
CAGL0G00704g	SWD1	0	0	5	5	5	5	5	decreased	no	no
CAGL0G00814g	CHS5	0	0	5	5	5	5	5	no	no	no
CAGL0G00858g	MID2	0	0	4	5	1	5	5	no	no	no
CAGL0G01056g	GAS2	0	0	5	5	5	5	5	no	no	no
CAGL0G01320g	MSG5	0	0	5	5	5	5	5	decreased	no	no
CAGL0G01386g	SLM1	0	0	5	5	5	5	5	no	decreased	no
CAGL0G02035g	CKA2	2	1	5	5	5	5	5	no	no	no
CAGL0G02101g	ECM4	0	0	5	5	5	5	5	no	no	no
CAGL0G02343g	TVP38	0	0	5	5	5	5	5	no	no	no
CAGL0G02497g	MLP1	0	0	5	5	5	5	5	no	no	no
CAGL0G02607g	PRK1	0	0	5	5	5	5	5	no	no	no
CAGL0G02717g	SGA1	0	0	5	5	5	5	5	no	no	no
CAGL0G02739g	XBP1	0	0	5	5	5	5	5	no	no	no
CAGL0G02827g	SLM1	0	0	3.5	5	2	5	5	no	no	no
CAGL0G03179g	ASK10	0	0	5	5	5	5	5	no	no	no
CAGL0G03267g	AST1	0	0	5	5	5	5	5	no	no	no
CAGL0G03421g	FLO8	0	0	5	5	5	5	5	increased	no	no
CAGL0G03597g	SHO1	0	0	4.5	2	3.5	3	0.5	no	no	no
CAGL0G04125g	SAG1	0	0	5	5	5	5	5	no	no	no
CAGL0G04389g	GZF3	0	0	5	5	5	5	5	decreased	no	no
CAGL0G04433g	PRM10	0	0	5	5	5	5	5	no	no	no
CAGL0G04609g	PKH2	0	0	5	5	5	5	5	no	no	no
CAGL0G04851g	SUR4	0	0	5	5	5	5	5	no	no	no
CAGL0G04873g	ROM2	0	0	5	5	5	5	5	no	no	no
CAGL0G05093g		0	0	5	5	5	5	5	no	no	no
CAGL0G05379g	GCR2	0	0	5	5	5	5	5	no	no	no
CAGL0G05566g	FMP45	0	0	5	5	5	5	5	no	no	no
CAGL0G05896g	DSE2	0	0	5	5	5	5	5	no	no	yes
CAGL0G05918g	CHS7	0	0	5	5	5	5	5	no	no	no
CAGL0G06072g	ECM14	0	0	5	5	5	5	5	no	no	no
CAGL0G06556g	PHO23	0	0	5	5	5	5	5	decreased	no	no
CAGL0G06754g	CDC10	0	0	0	5	2.5	5	5	no	no	yes
CAGL0G06864g	MPS3	0	0	2.5	5	0.5	5	0	decreased	no	no
CAGL0G07040g	OST6	0	0	5	5	5	5	5	no	no	no
CAGL0G07249g	YOX1	0	0	5	5	5	5	5	no	no	no
CAGL0G07667g	PRY2	0	0	5	5	5	5	5	no	no	no
CAGL0G07887g		0	0	5	5	5	5	5	no	no	no
CAGL0G08019g		0	0	5	5	5	5	5	no	no	no
CAGL0G08107g	GIS1	0	0	5	5	5	5	5	no	no	no
CAGL0G08624g	QDR2	0	0	5	5	5	5	5	no	no	no
CAGL0G08646g	POG1	0	0	5	5	5	5	5	no	no	no
CAGL0G08844g		0	0	5	5	5	5	5	no	no	no
CAGL0G08866g	FKH1	0	0	5	5	5	5	5	no	no	no
CAGL0G09020g	TPK2	0	0	1	3	3	4	4	no	no	no
CAGL0G09042g	AFT2	0	0	5	5	5	5	5	increased	no	no
CAGL0G09449g	CRH1	0	0	5	5	5	5	5	no	no	no
CAGL0G09515g	EXG1	0	0	5	5	5	5	5	increased	no	no
CAGL0G09757g		0	0	5	5	5	5	5	no	no	no
CAGL0G09999g	ATG13	0	0	5	5	5	5	5	no	no	no
CAGL0H00396g	LEU3	0	0	5	5	5	5	5	no	no	no
CAGL0H00847g	HUT1	0	0	5	5	5	5	5	no	no	no
CAGL0H01287g	SSD1	1	1	4	4	0	5	5	no	no	no
CAGL0H01683g		0	0	5	5	5	5	5	no	no	no
CAGL0H02145g	STE12	0	0	5	5	5	5	5	increased	no	no
CAGL0H02519g		0	0	5	5	5	5	5	no	no	no
CAGL0H02563g	HOR7	0	0	5	5	5	5	5	no	no	no
CAGL0H02959g	TOS8	0	0	5	5	5	5	5	no	no	no
CAGL0H03575g	SPO1	0	0	5	5	5	5	5	increased	no	no
CAGL0H03751g	RFX1	0	0	5	5	5	5	5	no	no	no
CAGL0H03861g	HRB1	0	0	5	5	5	5	5	no	no	no
CAGL0H03993g	CIT1	0	0	5	5	5	5	5	no	no	no
CAGL0H04213g	YML081W	0	0	5	5	5	5	5	no	no	no
CAGL0H04367g	WAR1	0	0	5	5	5	5	5	no	no	no
CAGL0H04873g	STP3	0	0	5	5	5	5	5	no	no	no
CAGL0H05005g	CSR1	0	0	5	5	5	5	5	no	no	no
CAGL0H05621g	RLM1	0	0	5	5	0	5	5	increased	no	no
CAGL0H06215g	GAL11-like	0	0	5	5	5	5	5	no	increased	no
CAGL0H06347g	DEP1	2	0	5	5	0.5	5	5	decreased	no	no
CAGL0H06413g	CCW14	0	0	5	5	5	5	5	no	no	no
CAGL0H06435g	ECM19	0	0	5	5	5	5	5	no	no	no
CAGL0H06545g	ECM37	0	0	5	5	5	5	5	no	no	no
CAGL0H06633g	PCK1	0	0	5	5	5	5	5	no	no	no
CAGL0H06677g	IMP2'	0	0	5	5	5	5	5	no	no	no
CAGL0H06875g	ARG81	0	0	2.5	5	2.5	5	5	no	no	no
CAGL0H07403g	KRE2	0	0	5	4	1	5	5	no	no	no
CAGL0H07557g	FZF1	0	0	5	5	5	5	5	no	no	no
CAGL0H07711g	RTF1	0	0	2	4	3	5	5	decreased	no	no
CAGL0H07843g	HAP2	0	0	5	5	5	5	5	increased	no	no
CAGL0H08107g	HMS1	0	0	5	5	5	5	5	increased	no	no
CAGL0H08239g	HST3	0	0	5	5	5	5	5	no	no	no
CAGL0H08437g	VPS15	3	0	2	5	5	5	5	decreased	no	no
CAGL0H08624g	MCM16	0	0	3	5	3	5	5	no	no	no
CAGL0H08866g	HOT1	0	0	5	5	5	5	5	increased	no	no
CAGL0H09130g	MNN4	0	0	5	5	5	5	5	decreased	no	no
CAGL0H09460g	FAA2	0	0	5	5	5	5	5	no	no	no
CAGL0I00484g	EXG1	0	0	5	5	5	5	5	no	no	no
CAGL0I00726g		0	0	5	5	5	5	5	increased	no	no
CAGL0I00946g	CKB2	0	0	3	5	5	5	5	decreased	no	no
CAGL0I00968g	HIR2	0	0	5	5	5	5	5	decreased	no	no
CAGL0I01012g	PEP12	0	0	5	5	5	5	5	no	no	no
CAGL0I01188g	CDC12	0	0	5	5	5	5	5	decreased	no	yes
CAGL0I01232g	ERP5	0	0	5	5	5	5	5	no	no	no
CAGL0I02508g	CTR2	0	0	5	5	5	5	5	no	no	no
CAGL0I02552g	STB5	0	0	5	5	5	5	5	no	no	no
CAGL0I03432g		0	0	5	5	5	5	5	no	no	no
CAGL0I03498g	STE7	0	0	3	5	4	5	5	no	no	no
CAGL0I03872g	SNF3	0	0	5	5	5	5	5	no	no	no
CAGL0I03894g		0	0	5	5	5	5	5	no	no	no
CAGL0I04092g	SHE10	0	0	5	5	5	5	5	no	no	no
CAGL0I04180g	CUP2	0	0	5	5	5	5	5	no	no	no
CAGL0I04246g	SUT1	0	0	5	5	5	5	5	no	no	no
CAGL0I04664g	FIG1	0	0	5	5	5	5	5	no	no	no
CAGL0I04862g	SNQ2	0	0	5	5	5	5	5	no	no	no
CAGL0I05170g	CST6	0	0	5	5	5	5	5	decreased	no	no
CAGL0I05192g	CKA1	0	0	5	5	5	5	5	decreased	no	no
CAGL0I05236g	BCY1	0	0	1	4	4	4	5	no	decreased	no
CAGL0I06116g	SSY5	0	0	5	5	5	5	5	no	no	no
CAGL0I06138g	FAR1	0	0	5	5	5	5	5	no	no	no
CAGL0I06160g	CIS3	0	0	5	5	5	5	5	no	no	no
CAGL0I06182g	PIR1	0	0	5	5	5	5	5	no	no	no
CAGL0I07183g	SFL1	0	0	5	5	5	5	5	decreased	no	no
CAGL0I07491g	IZH1	0	0	5	5	5	5	5	no	no	no
CAGL0I07513g	PKH2	0	0	1	5	0	5	5	no	no	no
CAGL0I07755g	HAL9	0	0	5	5	5	5	5	no	no	no
CAGL0I08085g	EMI5	0	0	5	5	5	5	5	no	no	no
CAGL0I08195g	GPA2	0	0	5	5	5	5	5	decreased	no	no
CAGL0I08503g	MET16	0	0	5	5	5	5	5	no	no	no
CAGL0I08855g	KRE11	0	0	5	5	5	5	5	no	no	no
CAGL0I09130g	PTR3	0	0	3	5	1	5	1	no	no	no
CAGL0I09416g		0	0	5	5	5	5	5	no	no	no
CAGL0I09922g	GNT1	0	0	5	5	5	5	5	no	no	no
CAGL0I10494g	NCE102	0	0	5	5	5	5	5	no	no	no
CAGL0I10538g	SYF2	0	0	5	5	5	5	5	no	no	no
CAGL0I10769g	MCM1a	0	0	3.5	4	1.5	5	5	no	no	no
CAGL0I10945g	MCA1	0	0	5	5	5	5	5	no	no	no
CAGL0J00253g	MTL1	0	0	5	5	5	5	5	no	no	no
CAGL0J00539g	SLT2	0	1	4	5	0	5	5	no	no	no
CAGL0J00803g	MHP1	0	0	5	5	5	5	5	no	decreased	no
CAGL0J01595g	YPR015C	0	0	5	5	5	5	5	no	no	no
CAGL0J02134g	INP51	0	0	5	5	5	5	5	no	no	no
CAGL0J02288g	BAR1	0	0	5	5	5	5	5	no	no	no
CAGL0J03058g	ICL1	0	0	5	5	5	5	5	no	no	no
CAGL0J03366g	RMD7	0	0	5	5	5	5	5	decreased	no	no
CAGL0J03454g	HDA1	0	0	5	5	5	5	5	decreased	no	no
CAGL0J03608g	HCM1	0	0	5	5	5	5	5	no	no	no
CAGL0J03828g	MKK2	0	0	3.5	4.5	0	5	5	no	decreased	no
CAGL0J04290g	FUS3	0	0	5	5	5	5	5	no	no	no
CAGL0J04312g	PEP1	0	0	5	5	5	5	5	no	no	no
CAGL0J04356g	APN2	0	0	5	5	5	5	5	no	no	no
CAGL0J04400g	HAP3	0	0	5	5	5	5	5	no	no	no
CAGL0J05060g	ZAP1	0	0	5	5	5	5	5	increased	no	no
CAGL0J05236g	LAS21	0	0	5	5	5	5	5	decreased	no	no
CAGL0J05874g	ASI2	0	0	5	5	5	5	5	no	no	no
CAGL0J06072g	CBK1	0	0	1	1	0.5	5	5	decreased	no	yes
CAGL0J06182g	SKO1	0	0	5	5	5	5	5	no	no	no
CAGL0J06490g	CUE1	0	0	3.5	5	5	5	5	no	no	no
CAGL0J06974g	HOS3	0	0	5	5	5	5	5	no	no	no
CAGL0J07150g	PIP2	0	0	5	5	5	5	5	no	no	no
CAGL0J07282g	KRH2	0	0	5	5	5	5	5	no	no	no
CAGL0J07370g	JJJ1	0	0	5	5	5	5	5	no	no	no
CAGL0J07656g	SLA2	0	0	5	5	5	5	5	decreased	no	no
CAGL0J07898g	GIS2	0	0	5	5	5	5	5	no	no	no
CAGL0J07942g	SIP3	0	0	4	5	0	5	5	no	no	no
CAGL0J08074g	PDR17	0	0	5	5	5	5	5	no	no	no
CAGL0J08206g	BNI1	0	0	5	3	5	5	5	decreased	no	yes
CAGL0J08371g	PRM1	0	0	5	5	5	5	5	no	no	no
CAGL0J08481g		0	0	5	5	5	5	5	no	no	no
CAGL0J08569g	OST3	0	0	0.5	1.5	5	5	5	no	no	no
CAGL0J08613g	YVC1	0	0	5	5	5	5	5	no	increased	no
CAGL0J08712g	FUN26	0	0	5	5	5	5	5	no	no	no
CAGL0J08734g	PMT2	0	0	3	3	0	5	5	no	no	no
CAGL0J08778g	SEC13	0	0	5	5	5	5	5	no	no	no
CAGL0J08910g	CRR1	0	0	5	5	5	5	5	no	no	no
CAGL0J09416g	SNA4	0	0	5	5	5	5	5	no	no	no
CAGL0J10120g	FKH2	0	0	5	5	5	5	5	no	no	yes
CAGL0J10274g	MKS1	0	0	5	5	5	5	5	decreased	no	no
CAGL0J10296g	APJ1	0	0	5	5	5	5	5	no	no	no
CAGL0J10472g	SSN2	0	0	5	5	5	5	5	no	increased	no
CAGL0J10582g	PSP2	0	0	5	5	5	5	5	no	no	no
CAGL0J11308g	NPR1	0	0	5	5	5	5	5	no	no	no
CAGL0J11506g	CHS1	0	0	4.5	4.5	1	5	5	no	no	no
CAGL0J11748g	PLB2	0	0	5	5	5	5	5	no	no	no
CAGL0J11770g	PLB1	0	0	5	5	5	5	5	no	no	no
CAGL0K00297g	SAC1	0	0	5	5	5	5	5	no	no	no
CAGL0K00363g	STE6	0	0	5	5	5	5	5	no	no	no
CAGL0K00649g	SOP4	0	0	5	5	5	5	5	no	no	no
CAGL0K00693g	SWE1	0	0	5	5	5	5	5	no	no	no
CAGL0K00715g	RTA1	0	0	5	5	5	5	5	increased	no	no
CAGL0K01331g	SIT4	0	0	5	5	5	5	5	no	no	no
CAGL0K01463g	SIR2	0	0	5	5	5	5	5	no	no	no
CAGL0K01507g	GPR1	0	0	5	5	5	5	5	decreased	no	no
CAGL0K02145g		0	0	5	5	5	5	5	no	no	no
CAGL0K02277g	DSE1	0	0	5	5	5	5	5	no	no	no
CAGL0K02343g	YPR022C	0	0	5	5	5	5	5	no	no	no
CAGL0K02673g	STE20	0	0	4	2	3	5	4	no	increased	no
CAGL0K02827g	DID4	0	0	5	5	5	5	5	increased	no	no
CAGL0K03003g	MOT3	0	0	5	5	5	5	5	no	no	no
CAGL0K03245g		0	0	5	5	5	5	5	no	no	no
CAGL0K03399g	YPK1	2	1	2	4.5	0	5	5	no	no	no
CAGL0K03773g	SAS2	0	0	5	5	5	5	5	no	no	no
CAGL0K04037g	GSC2	0	0	5	5	5	5	5	no	no	no
CAGL0K04169g	KSS1	0	0	5	5	5	5	5	no	no	no
CAGL0K04257g	RME1	0	0	5	5	5	5	5	no	no	no
CAGL0K04279g	SCM4	0	0	5	5	5	5	5	no	no	no
CAGL0K04367g	MUP1	0	0	5	5	5	5	5	increased	no	no
CAGL0K04455g	SPR3	0	0	5	5	5	5	5	no	no	no
CAGL0K04543g	SPT4	0	0	5	5	5	5	5	no	no	no
CAGL0K04631g	YGR067C	0	0	5	5	5	5	5	no	no	no
CAGL0K04697g	STP4	0	0	5	5	5	5	5	no	no	no
CAGL0K05423g	TIP41	0	0	5	5	5	5	5	decreased	no	no
CAGL0K05577g	ATX2	0	0	5	5	5	5	5	no	no	no
CAGL0K05709g	GIN4	0	0	5	5	5	5	5	no	no	yes
CAGL0K05797g	EMI1	0	0	5	5	5	5	5	decreased	no	no
CAGL0K05841g	HAP1	0	0	5	5	5	5	5	no	no	no
CAGL0K06127g	ECM11	0	0	5	5	5	5	5	no	no	no
CAGL0K06193g	ADA2	0	0	3.5	1	0	5	5	no	no	no
CAGL0K06413g	STP1	0	0	5	5	5	5	5	no	no	no
CAGL0K06479g	PKH3	0	0	5	5	5	5	5	no	no	no
CAGL0K06963g	ROT2	0	0	1	4	5	5	5	decreased	no	no
CAGL0K06985g		0	0	5	5	5	5	5	no	no	no
CAGL0K07161g	SNF4-like	0	0	5	5	5	5	5	no	no	no
CAGL0K07634g	GAT1	0	0	5	5	5	5	5	no	no	no
CAGL0K08228g		0	0	5	5	5	5	5	no	no	no
CAGL0K08272g	YSR3	0	0	5	5	5	5	5	no	no	no
CAGL0K08426g	EMP24	0	0	5	5	5	5	5	no	no	no
CAGL0K08624g	HAP4	0	0	5	5	5	5	5	no	no	no
CAGL0K08668g	MET28	0	0	5	5	5	5	5	no	no	no
CAGL0K08690g		0	0	4	4.5	2	5	5	no	no	no
CAGL0K08756g	YAP5	0	0	5	5	5	5	5	no	no	no
CAGL0K08998g	OSW1	0	0	5	5	5	5	5	no	no	no
CAGL0K09372g	MIG2	0	0	5	5	5	5	5	no	no	no
CAGL0K09570g	CPT1	0	0	5	5	5	5	5	no	no	no
CAGL0K09900g	HAP5	0	0	5	5	5	5	5	no	no	no
CAGL0K09944g	PDE2	0	0	5	5	5	5	5	increased	no	no
CAGL0K09988g	TVP23	0	0	5	5	5	5	5	no	no	no
CAGL0K10164g	SED1	0	0	5	5	5	5	5	no	no	no
CAGL0K10604g	CMK2	0	0	5	5	5	5	5	no	no	no
CAGL0K10846g	PCD1	0	0	5	5	5	5	5	no	no	no
CAGL0K10868g	CTA1	0	0	5	5	5	5	5	no	no	no
CAGL0K11209g	PEX5	0	0	5	5	5	5	5	no	no	no
CAGL0K11231g	MNN10	0	0	1.5	0.5	0	5	5	decreased	no	no
CAGL0K11396g	SIR4	0	0	5	5	5	5	5	no	no	no
CAGL0K11902g	LYS14	0	0	5	5	5	5	5	no	no	no
CAGL0K12078g	NRG1	0	0	5	5	5	5	5	no	no	no
CAGL0K12254g	VID24	0	0	5	5	5	5	5	no	no	no
CAGL0K12320g		0	0	5	5	5	5	5	no	no	no
CAGL0K12430g	STE2	0	0	5	5	5	5	5	no	no	no
CAGL0K12540g	HAC1	0	0	5	5	5	5	5	no	no	no
CAGL0K12562g	RIM15	0	0	5	5	5	5	5	no	no	no
CAGL0K12738g	FET5	0	0	5	5	5	5	5	no	no	no
CAGL0K12914g	EMP47	0	0	5	5	5	5	5	no	no	no
CAGL0L00583g		0	0	5	5	5	5	5	no	no	no
CAGL0L00605g	CNB1	0	1	5	0	0	0	5	no	no	no
CAGL0L00627g	KRH1	0	0	5	5	5	5	5	no	increased	no
CAGL0L01001g	NOT3	0	0	5	5	5	5	5	no	no	no
CAGL0L01331g	ANP1	0	0	3	0.5	0	5	2	no	no	no
CAGL0L01463g		0	0	5	5	5	5	5	no	no	no
CAGL0L01485g	GSF2	0	0	5	5	5	5	5	no	no	no
CAGL0L01551g	SUR7	0	0	5	5	5	5	5	no	no	no
CAGL0L01727g	DCW1	0	0	5	5	5	5	5	no	no	no
CAGL0L01771g	SOK2	0	0	5	5	5	5	5	no	no	no
CAGL0L01903g	RGT1	0	0	5	5	5	5	5	no	no	no
CAGL0L02123g	SNF5	0	0	0	5	4	5	5	no	no	no
CAGL0L02299g	VPS1	0	0	5	5	5	5	5	no	no	no
CAGL0L02585g	BAS1	0	0	5	5	5	5	5	decreased	no	no
CAGL0L02651g	STE13	0	0	5	5	5	5	5	no	no	no
CAGL0L02739g	SAS5	0	0	5	5	5	5	5	no	no	no
CAGL0L02761g	STE4	0	0	5	5	5	5	5	no	no	no
CAGL0L02827g	PTP2	0	0	5	5	5	5	5	no	no	no
CAGL0L03091g	SET3	0	0	5	5	5	5	5	no	no	no
CAGL0L03135g	SPO14	0	0	5	5	5	5	5	no	no	no
CAGL0L03157g	DAL80	0	0	5	5	5	5	5	no	no	no
CAGL0L03377g		0	0	5	5	5	5	5	no	no	no
CAGL0L03520g	BCK1	0	0	4	4.5	0	5	5	no	decreased	no
CAGL0L03608g	FMP50	0	0	5	5	5	5	5	no	no	no
CAGL0L03674g		0	0	5	5	5	5	5	no	no	no
CAGL0L03696g	ECM3	0	0	5	5	5	5	5	increased	no	no
CAGL0L03916g	AZF1-LIKE	0	0	5	5	5	5	5	no	no	no
CAGL0L04290g	NFI1	0	0	5	5	5	5	5	no	no	no
CAGL0L04400g	YRR1	0	0	5	5	5	5	5	no	no	no
CAGL0L04576g	YRR1	0	0	5	5	5	5	5	increased	no	no
CAGL0L05412g	ASF1	0	0	3	4	3	5	5	decreased	no	no
CAGL0L05632g	PBS2	0	0	4.5	4.5	4.5	3	0	no	no	no
CAGL0L06028g	GTS1	0	0	5	5	5	5	5	no	decreased	no
CAGL0L06072g	YER130C	0	0	5	5	5	5	5	no	no	no
CAGL0L06138g	TPN1	0	0	3	4	5	5	5	decreased	no	no
CAGL0L06226g	HEK2	0	0	4	4	1	5	5	no	no	no
CAGL0L06336g	STE5	0	0	5	5	5	5	5	no	no	no
CAGL0L06424g		0	0	5	5	5	5	5	no	increased	no
CAGL0L06776g	GAT2	0	0	5	5	5	5	5	no	no	no
CAGL0L06798g	MDH3	0	0	5	5	5	5	5	no	no	no
CAGL0L06842g	THI3	0	0	5	5	5	5	5	no	no	no
CAGL0L07216g	PMT1	0	0	5	5	5	5	5	no	no	no
CAGL0L07326g	DUN1	0	0	5	5	5	5	5	no	no	no
CAGL0L07436g	PHO2	0	0	5	5	5	5	5	no	no	no
CAGL0L07480g	NRG2	0	0	5	5	5	5	5	no	no	no
CAGL0L07656g	GLO1	0	0	5	5	5	5	5	no	no	no
CAGL0L07744g	ADP1	0	0	5	5	5	5	5	no	no	no
CAGL0L07854g	CWH43	0	0	5	5	5	5	5	no	no	no
CAGL0L08140g	BPH1	0	0	5	5	5	5	5	no	increased	no
CAGL0L08162g	SNT1	0	0	5	5	5	5	5	no	no	no
CAGL0L08294g	AXL2	0	0	5	5	5	5	5	increased	no	no
CAGL0L08668g	HST2	0	0	5	5	5	5	5	no	no	no
CAGL0L08910g	AEP3	0	0	5	5	5	5	5	decreased	no	no
CAGL0L09042g	HAT1	0	0	5	5	5	5	5	no	no	no
CAGL0L09339g	HAA1	0	0	5	5	5	5	5	no	no	no
CAGL0L09383g	SUT2	0	0	5	5	5	5	5	no	no	no
CAGL0L09691g	PUT3	0	0	5	5	5	5	5	no	no	no
CAGL0L09933g	CUE5	0	0	5	5	5	5	5	no	no	no
CAGL0L10868g		0	0	5	5	5	5	5	no	no	no
CAGL0L10956g	RIM20	0	0	5	5	5	5	5	no	no	no
CAGL0L11110g	CNA1	0	1	5	0	0	0	5	no	no	no
CAGL0L11308g	ERV41	0	0	5	5	5	5	5	increased	no	no
CAGL0L11528g	BIG1	0	0	0	3	5	5	5	decreased	no	no
CAGL0L11572g	SBE22	0	0	5	5	5	5	5	no	no	no
CAGL0L11704g	SPT2	0	0	5	5	5	5	5	no	no	no
CAGL0L11770g	CHD1	0	0	5	5	5	5	5	no	no	no
CAGL0L11880g	RPH1	0	0	5	5	3	5	5	no	no	no
CAGL0L12056g	BMH1	0	0	5	5	5	5	5	no	no	no
CAGL0L12562g	MET31	0	0	4.5	4	2	5	5	no	no	no
CAGL0L12650g	SSN3	0	0	5	5	5	5	5	no	no	no
CAGL0L12782g	DIG1	0	0	5	5	5	5	5	no	no	no
CAGL0L12980g	SET1	0	0	5	5	5	5	5	no	no	no
CAGL0L13068g	EPT1	0	0	5	5	5	5	5	no	no	no
CAGL0L13090g	NDT80	0	0	5	5	5	5	5	no	no	no
CAGL0L13244g	EMP47	0	0	5	5	5	5	5	no	no	no
CAGL0M00220g	PMT4	0	0	5	5	5	5	5	no	no	no
CAGL0M00286g	HIR3	0	0	5	5	5	5	5	decreased	no	no
CAGL0M00528g	MNS1	0	0	4	5	0	5	5	no	no	no
CAGL0M00594g	ZMS1	0	0	5	5	5	5	5	no	no	no
CAGL0M00748g	ECM7	0	0	5	5	5	5	5	no	no	no
CAGL0M00770g	SIR3	0	0	5	5	5	5	5	no	no	no
CAGL0M01254g	STE12-LIKE	0	0	5	5	5	5	5	no	no	no
CAGL0M01540g	SPT3	0	0	2	4	1	5	5	no	no	no
CAGL0M01628g	SAC7	1	0	5	2	5	5	5	decreased	no	no
CAGL0M01716g	TEC1	0	0	5	5	5	5	5	no	no	no
CAGL0M01760g	PDR5	0	3	5	5	5	5	5	no	no	no
CAGL0M01826g	ECM33	0	0	5	5	5	5	5	no	no	no
CAGL0M01870g	YPR013C	0	0	5	5	5	5	5	no	no	no
CAGL0M02387g	PXA1	0	0	5	5	5	5	5	no	no	no
CAGL0M02431g	KES1	0	0	5	5	5	5	5	decreased	no	no
CAGL0M02563g	UME1	0	0	5	5	5	5	5	no	no	no
CAGL0M02585g	SPP1	0	0	5	5	5	5	5	no	no	no
CAGL0M02651g	RDS2	0	0	5	5	5	5	5	no	no	no
CAGL0M02739g	TAF14	0	0	5	5	5	5	5	decreased	no	no
CAGL0M03025g	CAT8	0	0	5	5	5	5	5	no	no	no
CAGL0M03157g	TAX4	0	0	5	5	5	5	5	no	no	no
CAGL0M03597g	MID1	0	0	5	2	0	5	5	no	no	no
CAGL0M03663g	RIM21	0	0	5	5	5	5	5	no	no	no
CAGL0M03707g	MON2	0	0	5	5	5	5	5	no	no	no
CAGL0M03773g	TOS6	0	0	5	5	5	5	5	no	decreased	yes
CAGL0M03927g	STB1	0	0	5	5	5	5	5	no	no	no
CAGL0M04015g	DAL82	0	0	5	5	5	5	5	increased	no	no
CAGL0M04169g	KRE1	1	0	5	0	4	0	3	decreased	no	yes
CAGL0M04191g	YPS1	0	0	5	5	5	5	5	no	no	no
CAGL0M04323g	ACE2	0	0	5	5	5	5	5	no	no	yes
CAGL0M04565g	ACF2	0	0	5	5	5	5	5	no	no	no
CAGL0M04983g	MBF1	0	0	5	5	5	5	5	no	no	no
CAGL0M05489g	KTR3	0	0	5	5	5	5	5	no	no	no
CAGL0M05511g	FTH1	0	0	5	5	5	5	5	no	no	no
CAGL0M05533g	DUR1,2	0	0	5	5	5	5	5	no	no	no
CAGL0M05643g	YFH1	0	0	3.5	3	2	4	5	decreased	no	no
CAGL0M05841g	KTR2	2	2	0	1	3.5	4	5	decreased	no	no
CAGL0M05907g		0	0	5	5	5	5	5	no	no	no
CAGL0M05929g	FMP18	0	0	5	5	5	5	5	no	no	no
CAGL0M06325g	SMP1	0	0	4	5	2	5	5	increased	no	no
CAGL0M06699g	SDS3	0	0	4	5	0	5	5	decreased	no	no
CAGL0M06831g	CRZ1	0	0	5	4.5	0	5	5	no	no	no
CAGL0M06875g	SSN8	0	0	5	5	5	5	5	no	increased	no
CAGL0M06919g	FAP1	0	0	5	5	5	5	5	no	no	no
CAGL0M07183g	MDM31	0	0	5	5	5	5	5	no	no	no
CAGL0M07381g	KTR6	0	1	5	5	5	5	5	no	no	no
CAGL0M07634g	SOK2	0	0	5	5	5	5	5	increased	no	no
CAGL0M07656g	ERG5	0	0	5	5	0	5	5	no	no	no
CAGL0M07942g		0	0	5	5	5	5	5	no	no	no
CAGL0M08184g	STE3	0	0	5	5	5	5	5	no	no	no
CAGL0M08250g	ZRT3	0	0	5	5	5	5	5	no	no	no
CAGL0M08404g	TPK1	0	0	5	5	5	5	5	increased	no	no
CAGL0M08492g	PIR1	0	0	5	5	5	5	5	no	no	no
CAGL0M08756g	EXG2	0	0	5	5	5	5	5	no	no	no
CAGL0M08778g	SWM1	0	0	0	4.5	4	5	5	decreased	no	no
CAGL0M08800g	YAP6	0	0	5	5	5	5	5	no	increased	no
CAGL0M08910g	SNF1	0	0	4	5	0	5	5	no	no	no
CAGL0M09042g	IME1	0	0	5	5	5	5	5	increased	no	no
CAGL0M09207g	STE18	0	0	5	5	5	5	5	no	no	no
CAGL0M09405g	RTG3	0	0	5	3	2	5	5	no	no	no
CAGL0M09449g	ECM21	0	0	5	5	5	5	5	no	no	no
CAGL0M09669g	RIM13	0	0	5	5	3	5	5	no	decreased	no
CAGL0M09955g	SFP1	0	0	5	5	5	5	5	no	no	no
CAGL0M10087g	YAP3-like	0	0	5	5	5	5	5	increased	no	no
CAGL0M10791g	SSK2	0	0	5	5	5	5	5	no	no	no
CAGL0M11440g	CHA4	0	0	5	5	5	5	5	no	no	no
CAGL0M11726g	CCW12	0	0	5	5	5	5	5	no	decreased	no
CAGL0M12298g	OAF1	0	0	5	5	5	5	5	no	no	no
CAGL0M12507g		0	0	5	5	5	5	5	no	no	no
CAGL0M13189g	MSN4	0	0	5	5	5	5	5	increased	no	no
CAGL0M13321g	SVP26	0	0	5	5	5	5	5	no	no	no
CAGL0M13739g	ATM1	0	0	2	3	2	5	2	decreased	no	no
CAGL0M13805g	SCW4	0	0	5	5	5	5	5	no	no	no
CAGL0M13827g	FKS3	0	0	5	5	5	5	5	no	no	no
CAGL0M13849g	GAS1	0	0	5	5	5	5	5	no	no	no
