# Supplementary material for: Systematic Phenotyping of a Large-Scale Candida glabrata Deletion Collection Reveals Novel Antifungal Tolerance Genes
Source: PLoS Pathog. 2014 Jun 19;10(6):e1004211. doi: 10.1371/journal.ppat.1004211 (PMC4063973; doi:10.1371/journal.ppat.1004211)
Supplement: Table S5 — Fitness raw data of C. glabrata deletion strains with strong variations in relative fitness. Deletions displaying strong variations between independent mutants in the same gene or independent cultures, identifying 57 strains that were excluded from fitness analysis due to a standard deviation of more than 0.1, or an absolute difference in fitness of more than 0.1 between two biological replicates. (XLS) [file ppat.1004211.s014.xls]

## Sheet: Tabelle1
Table S5. Fitness raw data of C. glabrata deletion strains with strong variations in relative fitness.
Set	Position	Cg_ORF	Sc_Gene	Sc_ORF	Fitness	SD_Fitness	Delta Mean	Pb with data	SD > 0,1	Delta mean > 0,1	Pb TS vs KH
1A_BM	A10	CAGL0A04785g	RTG2	YGL252C	0.839945	0.0879647	-0.151396	Pb		Pb
1A_BM	B10	CAGL0C02277g	GLN3	YER040W	0.392354	0.126316	0.162833	Pb	Pb	Pb
1A_BM	B12	CAGL0C03399g	POP2	YNR052C	0.998323	0.264968	0.271111	Pb	Pb	Pb
1A_BM	D3	CAGL0E00693g	NGG1	YDR176W	0.998803	0.0978544	-0.165684	Pb		Pb
1A_BM	E5	CAGL0F03025g	ARO80	YDR421W	0.998526	0.0767131	0.117581	Pb		Pb
1A_BM	F5	CAGL0F08283g	GCN5	YGR252W	1.03279	0.165356	-0.257482	Pb	Pb	Pb
1A_BM	F6	CAGL0F09097g	SKN7	YHR206W	0.89589	0.188918	0.327002	Pb	Pb	Pb	Pb
1A_BM	G5	CAGL0G08844g	ASG1	YIL130W	1.04201	0.0602716	-0.102186	Pb		Pb
1A_BM	G11	CAGL0H04367g	WAR1	YML076C	1.11809	0.0351004	-0.0127056	Pb			Pb
1A_BM	H3	CAGL0H06875g	ARG81	YML099C	1.02291	0.0236609	-0.017558	Pb			Pb
1A_BM	D8	CAGL0E03718g	SNF6	YHL025W	0.490489	0.0502308	0.0868543	Pb			Pb
1A_BM	D5	CAGL0E02079g	MSN1	YOL116W	0.954594	0.0921759	0.0736601	Pb			Pb
1A_BM	A4	CAGL0A00451g	PDR1	YGL013C	0.998703	0.0323506	-0.0286743	Pb			Pb
2A_BM	B5	CAGL0J07898g	GIS2	YNL255C	0.98613	0.101023	0.166571	Pb	Pb	Pb
2A_BM	B6	CAGL0J07942g	SIP3	YNL257C	0.956373	0.0846364	-0.134827	Pb		Pb
2A_BM	B7	CAGL0J10120g	FKH2	YNL068C	1.00639	0.063562	0.103683	Pb		Pb
2A_BM	C3	CAGL0K05841g	HAP1	YLR256W	0.61563	0.0539654	-0.0661391	Pb			Pb
2A_BM	C4	CAGL0K06193g	ADA2	YDR448W	1.13403	0.104319	-0.172679	Pb	Pb	Pb
2A_BM	D6	CAGL0L02123g	SNF5	YBR289W	0.94968	0.0741404	-0.124624	Pb		Pb
2A_BM	E5	CAGL0L07436g	PHO2	YDL106C	0.92265	0.0718363	-0.123467	Pb		Pb
2A_BM	F1	CAGL0L11880g	RPH1	YER169W	1.09277	0.0231554	NA	Pb			Pb
2A_BM	F8	CAGL0M01254g	STE12	YHR084W	0.884217	0.0624499	0.100499	Pb		Pb
2A_BM	F9	CAGL0M01540g	SPT3	YDR392W	0.683067	0.323679	-0.556484	Pb	Pb	Pb
2A_BM	G6	CAGL0M04323g	SWI5	YDR146C	1.31613	0.266996	NA	Pb	Pb
2A_BM	H7	CAGL0M12298g	OAF1	YAL051W	1.05558	0.0793685	0.0742668	Pb			Pb
2A_BM	F12	CAGL0M02585g	SPP1	YPL138C	0.786176	0.0459755	-0.0370751	Pb			Pb
2A_BM	G1	CAGL0M02651g	RDS2	YPL133C	1.11066	0.0214841	-0.0132349	Pb			Pb
2A_BM	G9	CAGL0M06831g	CRZ1	YNL027W	1.0766	0.0338782	0.0483335	Pb			Pb
2A_BM	H6	CAGL0M11440g	CHA4	YLR098C	1.08618	0.0460929	0.0484041	Pb			Pb
TS_1	A4	CAGL0A03586g	YLR040C	YLR040C	0.947772	0.0879634	0.103146	Pb		Pb
TS_1	B8	CAGL0C02343g	ARB1	YER036C	0.917914	0.271388	0.606345	Pb	Pb	Pb
TS_1	C3	CAGL0D03674g	NEW1	YPL226W	0.850353	0.110734	0.186987	Pb	Pb	Pb
TS_1	C4	CAGL0D03850g	RSC3	YDR303C	0.888755	0.0866335	0.156076	Pb		Pb
TS_1	D6	CAGL0E06248g	RCN1	YKL159C	1.03	0.0661819	0.106359	Pb		Pb
TS_1	G4	CAGL0G07667g	PRY2	YKR013W	1.00336	0.0680591	0.104564	Pb		Pb
TS_1	H6	CAGL0H04367g	WAR1	YML076C	1.00319	0.0167838	0.00732589	Pb			Pb
TS_1	H8	CAGL0H06413g	CCW14	YLR390W-A	1.02187	0.0932685	0.105581	Pb		Pb
TS_1	H9	CAGL0H06875g	ARG81	YML099C	0.921572	0.105143	0.126934	Pb	Pb	Pb	Pb
TS_1	G6	CAGL0G08844g	ASG1	YIL130W	1.00286	0.0237604	0.0151297	Pb			Pb
TS_1	B7	CAGL0C02277g	GLN3	YER040W	1.03685	0.0384269	0.0558118	Pb			Pb
TS_1	E2	CAGL0F03025g	ARO80	YDR421W	1.05067	0.0256228	NA	Pb			Pb
TS_1	A1	CAGL0A00451g	PDR1	YGL013C	1.08818	0.0295495	0.0368762	Pb			Pb
TS_2	D4	CAGL0K12562g	RIM15	YFL033C	0.919277	0.0735284	0.113708	Pb		Pb
TS_2	E8	CAGL0L11110g	CNA1	YLR433C	0.947925	0.0283841	0.00111366	Pb			Pb
TS_2	H2	CAGL0M12298g	OAF1	YAL051W	0.8729	0.0526507	0.0709842	Pb			Pb
TS_2	F3	CAGL0M02651g	RDS2	YPL133C	1.0196	0.0374483	0.0653535	Pb			Pb
TS_2	G2	CAGL0M06831g	CRZ1	YNL027W	1.03013	0.0211394	0.00289965	Pb			Pb
TS_2	G11	CAGL0M11440g	CHA4	YLR098C	0.991573	0.0451929	0.0297377	Pb			Pb
TS_4	E1	CAGL0E02783g	SLA1	YBL007C	0.932022	0.10008	0.13935	Pb	Pb	Pb
TS_4	F1	CAGL0F04873g	KRE6	YPR159W	#N/A	#N/A	#N/A	Pb
TS_4	B11	CAGL0F09097g	SKN7	YHR206W	1.0342	0.0235721	0.0357189	Pb			Pb
TS_4	A2	CAGL0K05841g	HAP1	YLR256W	0.984954	0.0385145	0.0421271	Pb			Pb
TS_4	B8	CAGL0L11110g	CNA1	YLR433C	1.05957	0.0461584	0.00113064	Pb			Pb
TS_4	B10	CAGL0E03718g	SNF6	YHL025W	0.986126	0.0395564	0.00311875	Pb			Pb
TS_5	G1	CAGL0D02750g	MYO2	YOR326W	0.875689	0.0844266	-0.146009	Pb		Pb
TS_5	C9	CAGL0L11880g	RPH1	YER169W	0.879172	0.0483499	NA	Pb			Pb
TS_6	B7	CAGL0F03619g	NIP100	YPL174C	0.955875	0.084084	0.14518	Pb		Pb
TS_6	B9	CAGL0F06787g	MND2	YIR025W	0.983329	0.101861	0.174638	Pb	Pb	Pb
TS_6	C2	CAGL0I03432g	YDL160C-A	YDL160C-A	0.813842	0.152096	NA	Pb	Pb
TS_6	C11	CAGL0K08690g	YOL036W	YOL036W	0.781596	0.2869	0.490691	Pb	Pb	Pb
TS_6	E10	CAGL0L03135g	SPO14	YKR031C	0.83916	0.173905	0.300959	Pb	Pb	Pb
TS_6	H6	CAGL0M08910g	SNF1	YDR477W	0.842675	0.121741	0.201814	Pb	Pb	Pb
TS_7	H2	CAGL0D01496g	ISA2	YPR067W	0.871363	0.155507	0.260096	Pb	Pb	Pb
TS_7	C2	CAGL0E02629g	ALG6	YOR002W	0.705515	0.218511	0.368306	Pb	Pb	Pb
TS_7	A12	CAGL0G02035g	CKA2	YOR061W	0.699048	0.21079	-0.361873	Pb	Pb	Pb
TS_7	C8	CAGL0J08569g	OST3	YOR085W	0.75335	0.152077	0.0388688	Pb	Pb
TS_7	E11	CAGL0J08734g	PMT2	YAL023C	0.815495	0.103273	-0.114876	Pb	Pb	Pb
TS_7	A4	CAGL0K03399g	YPK1	YKL126W	0.458299	0.160486	-0.0765555	Pb	Pb
TS_7	D5	CAGL0L01331g	ANP1	YEL036C	0.865317	0.116208	0.177522	Pb	Pb	Pb
TS_7	B4	CAGL0L07326g	DUN1	YDL101C	0.778663	0.160946	-0.269098	Pb	Pb	Pb
TS_9	H10	CAGL0E02079g	MSN1	YOL116W	#N/A	#N/A	#N/A	Pb
TS_9	B6	CAGL0G04433g	PRM10	YJL108C	0.921589	0.100967	NA	Pb	Pb
TS_9	F4	CAGL0I02508g	CTR2	YHR175W	1.0939	0.0753668	0.10218	Pb		Pb
