# Supplementary material for: Systematic Phenotyping of a Large-Scale Candida glabrata Deletion Collection Reveals Novel Antifungal Tolerance Genes
Source: PLoS Pathog. 2014 Jun 19;10(6):e1004211. doi: 10.1371/journal.ppat.1004211 (PMC4063973; doi:10.1371/journal.ppat.1004211)
Supplement: Table S6 — Fitness raw data of C. glabrata deletion mutants. The table shows the raw data for fitness analysis, including fitness and standard deviation (SD).The orange (>3 SD) and red (>2<3 SD) color-coding indicates genes with deviations below and above the average fitness indices. Grey font indicates mutants where only a single isolate was obtained. (XLS) [file ppat.1004211.s015.xls]

## Sheet: Tabelle1
Table S6. Fitness raw data of C. glabrata deletion mutants.
Set	Position	Cg_ORF	Sc_Gene	Sc_ORF	Doubling time (s)	Fitness	SD_Fitness	Delta Mean
TS_2	H3	CAGL0M13739g	ATM1	YMR301C	9030.5	0.426062	0.0103927	NA	<3SD
TS_5	C6	CAGL0L11528g	BIG1	YHR101C	8238.38	0.508128	0.0750493	-0.0806182	<3SD
TS_7	H11	CAGL0M05643g	YFH1	YDL120W	7827.5	0.524166	0.0157471	-0.00862647	<3SD
2A_BM	E2	CAGL0L05412g	ASF1	YJL115W	7539.25	0.529861	0.00872507	NA	<3SD
TS_5	D5	CAGL0M05841g	KTR2	YKR061W	6850.38	0.602162	0.00768447	0.00266808	<3SD
TS_4	D6	CAGL0D01034g	PSA1	YDL055C	6602.19	0.60482	0.0220755	0.0272883	<3SD
TS_9	B11	CAGL0D00242g	CNE1	YAL058W	6838	0.605783	0.0162003	NA	<3SD
TS_7	B2	CAGL0I00946g	CKB2	YOR039W	6171.38	0.665418	0.00945939	-0.00537896	<3SD
2A_BM	D7	CAGL0L02585g	BAS1	YKR099W	6093.38	0.67231	0.06589	0.0803257	<3SD
2A_BM	A6	CAGL0I07183g	SFL1	YOR140W	5789.88	0.704602	0.0534913	0.0685283	<3SD
TS_4	A4	CAGL0B01441g	RPD3	YNL330C	5536.07	0.722165	0.048482	0.0383706	<3SD
TS_5	A2	CAGL0J05236g	LAS21	YJL062W	5698	0.72462	0.0246261	-0.00342168	<3SD
TS_9	A8	CAGL0D02442g	LEM3	YNL323W	5635.25	0.73555	0.0321355	NA	<3SD
TS_5	A4	CAGL0J06072g	CBK1	YNL161W	5509	0.749402	0.0255969	0.0340825	<3SD
1A_BM	B1	CAGL0B01441g	RPD3	YNL330C	5432	0.754964	0.00987321	-0.0111739	<3SD
1A_BM	E4	CAGL0F01837g	SPT8	YLR055C	5425.25	0.75606	0.0125357	0.0190345	<3SD
1A_BM	H5	CAGL0H07711g	RTF1	YGL244W	5401.75	0.759769	0.0233672	-0.0290087	<3SD
TS_5	B6	CAGL0K11231g	MNN10	YDR245W	5422.12	0.760995	0.0230287	-0.0029346	<3SD
TS_4	C3	CAGL0A01452g	CWH41	YGL027C	4986.4	0.767846	0.0426621	0.0435677	<3SD
TS_6	G9	CAGL0F08041g	PFK1	YGR240C	5363.5	0.771989	0.0005419	NA	<3SD
1A_BM	C11	CAGL0D02926g	BRE2	YLR015W	5302.09	0.774147	0.0261599	-0.0344443	<3SD
TS_5	B2	CAGL0K06963g	ROT2	YBR229C	5282.88	0.784035	0.0529251	-0.0458897	<3SD
1A_BM	D6	CAGL0E02475g	SIN3	YOL004W	5215.16	0.787229	0.0250488	0.00074185	<3SD
TS_2	B1	CAGL0I08195g	GPA2	YER020W	4508.41	0.797404	0.0473088	NA	<3SD
TS_3	B9	CAGL0F01507g	SLG1	YOR008C	4995.52	0.800794	0.0708118	0.0606262	<3SD
1A_BM	F11	CAGL0G04389g	GZF3	YJL110C	5104.38	0.803403	0.0114818	-0.0108205	<3SD
1A_BM	F7	CAGL0G00704g	SWD1	YAR003W	5103.7	0.804852	0.0388259	-0.0604205	<3SD
2A_BM	A10	CAGL0J03454g	HDA1	YNL021W	5031.93	0.806458	0.00342878	-0.00309566	<3SD
TS_2	F8	CAGL0M04169g	KRE1	YNL322C	4837.29	0.825611	0.0573056	0.00326608	<3SD
2A_BM	C2	CAGL0K05797g	EMI1	YDR512C	4919.34	0.827219	0.0502004	0.0227915	<3SD
TS_9	A11	CAGL0G06864g	MPS3	YJL019W	4964	0.834138	0.00820098	NA	<3SD
2A_BM	G2	CAGL0M02739g	TAF14	YPL129W	4862.07	0.835059	0.0220819	0.017494	<3SD
TS_6	E6	CAGL0E06556g	ISC1	YER019W	4912.6	0.839951	0.0169543	-0.0102128	<3SD
2A_BM	B8	CAGL0J10274g	MKS1	YNL076W	4822.94	0.841384	0.00855866	-0.0106808	<3SD
TS_7	C1	CAGL0E06028g	ALG5	YPL227C	4870.89	0.843288	0.024015	0.0370403	<3SD
TS_5	E2	CAGL0A01892g	DAT1	YML113W	4883.61	0.847243	0.0489775	0.0648964	<3SD
TS_1	B2	CAGL0B04521g	RAS1	YOR101W	4747.67	0.849239	0.0270305	NA	<3SD
TS_6	F8	CAGL0M02431g	KES1	YPL145C	4864.15	0.851636	0.0282585	NA	<3SD
TS_3	E4	CAGL0K01507g	GPR1	YDL035C	4505.17	0.851995	0.021788	NA	<3SD
TS_4	H12	CAGL0J03366g	GET2	YER083C	4688.84	0.85239	0.0397785	0.057571	<3SD
1A_BM	D10	CAGL0E04312g	STP1	YDR463W	4811.8	0.856605	0.0619838	0.0676075	<3SD
1A_BM	C3	CAGL0C05357g	SIR2	YDL042C	4781.21	0.857605	0.0091791	-0.0107011	<3SD
TS_7	D9	CAGL0H09130g	MNN4	YKL201C	4796.85	0.868214	0.0911816	NA	<3SD
TS_2	C4	CAGL0K01507g	GPR1	YDL035C	4417.41	0.869309	0.0332662	NA	<3SD
2A_BM	G8	CAGL0M06699g	SDS3	YIL084C	4662.9	0.87053	0.0144679	0.0192684	<3SD
TS_2	B8	CAGL0J08206g	BNI1	YNL271C	4642.76	0.873641	0.0311966	0.0103083	<3SD
TS_7	A11	CAGL0I05192g	CKA1	YIL035C	4700.43	0.873731	0.022007	0.030645	<3SD
TS_1	F8	CAGL0G01320g	MSG5	YNL053W	4599.52	0.875751	0.0129021	NA	<3SD
TS_6	C1	CAGL0H06347g	DEP1	YAL013W	4665.5	0.877196	0.0126396	NA	<3SD
1A_BM	D1	CAGL0E00561g	TUP1	YCR084C	4665.7	0.878832	0.010117	0.0026318	<3SD
TS_2	C6	CAGL0K05423g	TIP41	YPR040W	4606.79	0.883094	0.0498858	0.0203051	<3SD
TS_3	E5	CAGL0I08195g	GPA2	YER020W	4323.51	0.884746	0.0256595	0.0190258	<3SD
TS_4	C11	CAGL0B04631g	INP53	YOR109W	4505.89	0.885641	0.0129001	0.00850155	<3SD
TS_3	E9	CAGL0B04521g	RAS1	YOR101W	4486.68	0.888419	0.0764289	NA	<2SD
2A_BM	A5	CAGL0I05170g	CST6	YIL036W	4561.84	0.890461	0.0357455	0.00566994	<2SD
TS_6	H5	CAGL0H08437g	VPS15	YBR097W	4589.16	0.898032	0.0587141	-0.0550374	<2SD
2A_BM	F6	CAGL0M00286g	HIR3	YJR140C	4506.98	0.901171	0.0234754	0.0247476	<2SD
1A_BM	C2	CAGL0C05335g	RTG1	YOL067C	4561.88	0.901296	0.0460579	-0.00402605	<2SD
TS_6	A3	CAGL0A00583g	PDR8	YLR266C	4543.3	0.901628	0.0160082	NA	<2SD
TS_6	D4	CAGL0M08778g	SWM1	YDR260C	4577.14	0.902159	0.044918	0.0303461	<2SD
TS_2	H11	CAGL0L06138g	TPN1	YGL186C	4370.31	0.905059	0.0412797	0.0299555	<2SD
TS_4	G10	CAGL0I01188g	CDC12	YHR107C	4406.13	0.906156	0.0243098	0.0113133	<2SD
1A_BM	B7	CAGL0C00297g	SET2	YJL168C	4536.51	0.90789	0.0631859	0.0914204	<2SD
TS_4	D5	CAGL0D00220g	ECM1	YAL059W	4387.86	0.909002	0.0202573	0.00347784	<2SD
TS_1	D1	CAGL0E03476g	CDC25	YLR310C	4457.54	0.909515	0.0206072	0.0217705	<2SD
TS_4	D8	CAGL0D06446g	STT4	YLR305C	4372.69	0.913359	0.0389377	0.0183534	<2SD
TS_6	F1	CAGL0L08910g	AEP3	YPL005W	4517.07	0.913391	0.0267268	-0.0356144	<2SD
1A_BM	C12	CAGL0D05170g	PHO4	YFR034C	4483.79	0.914568	0.0185372	-0.00461474	<2SD
1A_BM	C7	CAGL0D01364g	CYC8	YBR112C	4490.54	0.915438	0.0447253	0.0596309	<2SD
TS_5	A5	CAGL0J07656g	SLA2	YNL243W	4491.96	0.919927	0.0466148	-0.0806986	<2SD
TS_5	D1	CAGL0M01628g	SAC7	YDR389W	4445.62	0.92096	0.00384888	NA	<2SD
1A_BM	C6	CAGL0D01012g	MBP1	YDL056W	4448.51	0.922269	0.017879	-0.00305026	<2SD
1A_BM	H10	CAGL0I00968g	HIR2	YOR038C	4443.43	0.92297	0.0171617	0.0119881	<2SD
1A_BM	G1	CAGL0G06556g	PHO23	YNL097C	4443.54	0.923058	0.024459	-0.0401771	<2SD
TS_1	H11	CAGL0H08624g	MCM16	YPR046W	4381.33	0.925414	0.0259413	0.00378216	<1SD
TS_5	C3	CAGL0L07854g	CWH43	YCR017C	4467.61	0.925848	0.0539308	0.0731	<1SD
TS_1	A3	CAGL0A01133g	MDL2	YPL270W	4365.56	0.928912	0.0357042	0.0436798	<1SD
TS_9	G7	CAGL0I01012g	PEP12	YOR036W	4419.05	0.929471	0.0338887	-0.00578524	<1SD
1A_BM	F9	CAGL0G03179g	GCA1	YPR115W	4420.07	0.92966	0.0408128	0.0540978	<1SD
TS_2	D6	CAGL0L01727g	DCW1	YKL046C	4168.76	0.929898	0.0158271	0.0144921	<1SD
TS_7	A6	CAGL0F00913g	PSK2	YOL045W	4414.93	0.930183	0.0182647	-0.0251931	<1SD
TS_1	F12	CAGL0G03597g	SHO1	YER118C	4361.2	0.930447	0.0911564	NA	<1SD
TS_2	H4	CAGL0M13849g	GAS1	YMR307W	4209.39	0.931054	0.0215175	0.00332769	<1SD
2A_BM	B4	CAGL0J07150g	PIP2	YOR363C	4350.04	0.933171	0.0214186	-0.023935	<1SD
TS_1	D4	CAGL0E04620g	ECM33	YBR078W	4314.03	0.934239	0.0221721	NA	<1SD
TS_2	E9	CAGL0L12056g	BMH1	YER177W	4185.79	0.936263	0.032129	0.0356923	<1SD
1A_BM	D7	CAGL0E02805g	HIR1	YBL008W	4377.36	0.936816	0.00891274	0.0146255	<1SD
1A_BM	D2	CAGL0E00627g	SRB8	YCR081W	4370.2	0.938863	0.0274476	-0.0371633	<1SD
TS_4	G6	CAGL0H07403g	KRE2	YDR483W	4250.12	0.938957	0.0243748	0.0116592	<1SD
TS_6	F10	CAGL0I09130g	PTR3	YFR029W	4377.1	0.939265	0.0402909	-0.0664381	<1SD
2A_BM	C1	CAGL0K04543g	SPT4	YGR063C	4314.01	0.940596	0.00932004	-0.00941882	<1SD
2A_BM	A12	CAGL0J04400g	HAP3	YBL021C	4335.2	0.941287	0.0817704	-0.0922224	<1SD
1A_BM	H8	CAGL0H08239g	HST3	YOR025W	4356.24	0.941521	0.025916	-0.0301193	<1SD
1A_BM	C5	CAGL0D00682g	SFP1	YLR403W	4352.25	0.943614	0.0399681	-0.0413395	<1SD
2A_BM	D3	CAGL0K12540g	HAC1	YFL031W	4311.75	0.944607	0.0564539	0.0878459	<1SD
TS_2	F4	CAGL0M03025g	CAT8	YMR280C	4105.83	0.944929	0.0453566	NA	<1SD
2A_BM	H4	CAGL0M09955g	SFP1	YLR403W	4296.69	0.945304	0.0344981	0.0170033	<1SD
TS_3	A8	CAGL0J11506g	CHS1	YNL192W	4244.26	0.947084	0.0712864	0.0869495	<1SD
TS_6	C6	CAGL0J06490g	CUE1	YMR264W	4352.18	0.947979	0.0116046	0.0145882	<1SD
2A_BM	D11	CAGL0L03916g	AZF1	YOR113W	4273.45	0.949596	0.0176534	-0.0244938	<1SD
TS_2	D5	CAGL0L00605g	CNB1	YKL190W	4119.58	0.949789	0.0311248	0.0284465	<1SD
TS_4	D4	CAGL0C05599g	LRG1	YDL240W	4192.21	0.951505	0.0235238	0.00443925	<1SD
1A_BM	B8	CAGL0C01485g	CTI6	YPL181W	4314.84	0.951779	0.0361044	0.0553181	<1SD
TS_1	G9	CAGL0G09757g	YLR278C	YLR278C	4264.84	0.951788	0.0396524	0.0697564	<1SD
TS_7	E10	CAGL0L07216g	PMT1	YDL095W	4306.7	0.953218	0.0042324	-0.00321239	<1SD
2A_BM	D4	CAGL0L01001g	NOT3	YIL038C	4254.79	0.953909	0.00653058	0.00671396	<1SD
TS_1	E10	CAGL0F07579g	CWP1	YKL096W	4243.29	0.955819	0.0337187	0.0364915	<1SD
TS_2	F9	CAGL0M04191g	YPS1	YLR120C	4087.21	0.955864	0.0283331	0.0303464	<1SD
TS_6	G6	CAGL0D06424g	ACO1	YLR304C	4333.73	0.956929	0.0561592	NA	<1SD
TS_2	H5	CAGL0I10945g	MCA1	YOR197W	4046.22	0.956968	0.0443483	0.00594371	<1SD
2A_BM	H3	CAGL0M09405g	RTG3	YBL103C	4236.66	0.958269	0.0241047	0.0217927	<1SD
TS_4	H3	CAGL0I07513g	PKH2	YOL100W	4167.84	0.958446	0.0365481	0.0635686	<1SD
TS_2	B10	CAGL0J11308g	NPR1	YNL183C	4233.94	0.95903	0.0431569	0.00150029	<1SD
TS_7	A7	CAGL0D02244g	MEK1	YOR351C	4281.89	0.959852	0.0388676	-0.0530572	<1SD
2A_BM	F3	CAGL0L12650g	SSN3	YPL042C	4230.85	0.959927	0.0355531	0.00137523	<1SD
TS_4	A8	CAGL0L06424g	YDR134C	YDR134C	4069.38	0.960996	0.039539	0.0285583	<1SD
TS_1	B5	CAGL0C01463g	TCO89	YPL180W	3984.13	0.961059	0.0346043	0.0536998	<1SD
TS_4	A7	CAGL0E01837g	YPS1	YLR120C	4040.6	0.962294	0.0331833	NA	<1SD
1A_BM	E2	CAGL0F00803g	GAL11	YOL051W	4270.19	0.962455	0.0515206	0.0325737	0SD
TS_5	D4	CAGL0M05489g	KTR3	YBR205W	4250.43	0.963139	7.71877e-05	NA	0SD
TS_3	A11	CAGL0L06336g	STE5	YDR103W	4004.33	0.963292	0.0281089	0.0212318	0SD
2A_BM	C5	CAGL0K06413g	STP1	YDR463W	4207	0.965176	0.0214757	0.00468624	0SD
2A_BM	G10	CAGL0M06875g	SSN8	YNL025C	4208.99	0.9656	0.0369017	0.0182603	0SD
2A_BM	E12	CAGL0L11770g	CHD1	YER164W	4135.1	0.966019	0.018844	NA	0SD
TS_3	A12	CAGL0J00253g	MTL1	YGR023W	4018.96	0.966431	0.0152242	0.0220924	0SD
TS_2	D8	CAGL0L01903g	RGT1	YKL038W	4027.03	0.966857	0.0293122	NA	0SD
1A_BM	B9	CAGL0C01551g	CUP9	YPL177C	4241.34	0.967654	0.0250567	0.0113964	0SD
2A_BM	B11	CAGL0K03773g	SAS2	YMR127C	4193.75	0.968349	0.0306152	-0.0334797	0SD
TS_2	E6	CAGL0L09691g	PUT3	YKL015W	4016.86	0.969036	0.025586	0.00358706	0SD
TS_5	G2	CAGL0D04840g	PSP1	YDR505C	4255.14	0.969578	0.0192534	-0.0247258	0SD
TS_5	E5	CAGL0A03410g	MLH1	YMR167W	4255.88	0.969789	0.0123559	0.00795791	0SD
TS_2	G12	CAGL0M11726g	CCW12	YLR110C	3998.4	0.970131	0.0356721	0.0260433	0SD
TS_1	E11	CAGL0F07601g	CWP1	YKL096W	4181.07	0.970451	0.0294017	0.0310005	0SD
TS_5	G3	CAGL0D05104g	KAR3	YPR141C	4249.35	0.971044	0.0133789	-0.0145097	0SD
TS_4	C10	CAGL0B04565g	KTR1	YOR099W	4105.51	0.97148	0.0160996	0.00698049	0SD
2A_BM	A4	CAGL0I04246g	SUT1	YGL162W	4180.32	0.971508	0.0308293	-0.0304984	0SD
TS_5	E11	CAGL0B03223g	YOR287C	YOR287C	4245.3	0.971922	0.0275715	-0.0417168	0SD
TS_2	D12	CAGL0L04400g	YRR1	YOR162C	3998.51	0.972396	0.0565237	0.00700279	0SD
TS_2	B9	CAGL0J08613g	YVC1	YOR087W	5700.51	0.973051	0.0285122	0.0183367	0SD
TS_7	A10	CAGL0E01683g	MCK1	YNL307C	4224.16	0.973118	0.0360334	0.012637	0SD
TS_2	D11	CAGL0L03674g	GSM1	YJL103C	4028.62	0.973234	0.0559843	0.0805688	0SD
TS_7	C12	CAGL0A04587g	ALG3	YBL082C	4218.31	0.973954	0.0312053	-0.0472507	0SD
2A_BM	C6	CAGL0K07161g	SNF4	YGL115W	4170.77	0.974427	0.0329536	0.0446871	0SD
TS_6	G4	CAGL0J03058g	ICL1	YER065C	4214.64	0.974836	0.0335199	-0.034513	0SD
2A_BM	A11	CAGL0J03608g	HCM1	YCR065W	4158.44	0.976196	0.0236669	0.00197409	0SD
TS_1	A5	CAGL0A04081g	SRP40	YKR092C	4150.01	0.976573	0.0223208	0.00445066	0SD
TS_1	D2	CAGL0E03762g	RIM101	YHL027W	4149.36	0.976598	0.0141174	0.0188266	0SD
1A_BM	F12	CAGL0G05379g	GCR2	YNL199C	4197.91	0.976751	0.00826174	-0.0123655	0SD
TS_2	D2	CAGL0K12078g	NRG1	YDR043C	3953.17	0.977382	0.0146711	0.00199073	0SD
TS_4	A6	CAGL0E01859g	YPS1	YLR120C	3955.26	0.977714	0.0292655	0.0193045	0SD
TS_1	D11	CAGL0F02079g	SMC1	YFL008W	4120.52	0.977753	0.0140085	NA	0SD
TS_1	D10	CAGL0F01463g	TIR1	YER011W	4144.79	0.97792	0.0180873	0.0231764	0SD
TS_9	A9	CAGL0I03872g	SNF3	YDL194W	4234.65	0.977924	0.0193884	NA	0SD
TS_9	A3	CAGL0M05929g	PAM17	YKR065C	4197.86	0.978144	0.0191698	-0.0274892	0SD
TS_5	H4	CAGL0E04202g	RFX1	YLR176C	4219.77	0.9782	0.0165289	-0.013022	0SD
TS_4	H6	CAGL0I08855g	KRE11	YGR166W	4081.22	0.978434	0.0252852	0.0264026	0SD
TS_1	E12	CAGL0F07755g	CEP3	YMR168C	4144.26	0.978895	0.0295061	0.0185151	0SD
TS_2	C12	CAGL0K10868g	CTA1	YDR256C	3960.48	0.979343	0.0231889	0.0245005	0SD
TS_4	G5	CAGL0H06545g	ECM37	YIL146C	4071.78	0.979853	0.0131607	0.0160114	0SD
TS_5	E9	CAGL0B00572g	DSF2	YBR007C	4210.91	0.980094	0.024793	-0.0193962	0SD
TS_5	A8	CAGL0K02277g	DSE1	YER124C	4208.73	0.980203	0.0139141	0.000631283	0SD
TS_2	C5	CAGL0K02673g	STE20	YHL007C	4142.66	0.980349	0.0523772	0.032184	0SD
TS_2	E7	CAGL0L10956g	RIM20	YOR275C	3934.65	0.980774	0.0274309	0.0434825	0SD
TS_4	D7	CAGL0D03256g	YEH2	YLR020C	4067.53	0.980925	0.0224224	0.0203177	0SD
2A_BM	B10	CAGL0K03003g	MOT3	YMR070W	4135.34	0.981707	0.0184787	-0.00746315	0SD
TS_5	H8	CAGL0E06578g	MRP13	YGR084C	4203.66	0.982113	0.0432632	-0.0626317	0SD
1A_BM	H1	CAGL0H06215g	GAL11	YOL051W	4177.2	0.982205	0.0273247	-0.0426233	0SD
TS_4	F5	CAGL0G00814g	CHS5	YLR330W	4061.22	0.982377	0.0187635	NA	0SD
TS_1	C8	CAGL0D06512g	CDC25	YLR310C	4096.75	0.983079	0.00603553	NA	0SD
TS_2	F2	CAGL0M02387g	PXA1	YPL147W	3943.8	0.983095	0.0290086	0.00672763	0SD
TS_7	D11	CAGL0M00528g	MNS1	YJR131W	4175.41	0.983633	0.0195079	-0.0319721	0SD
TS_5	E12	CAGL0C00781g	RDH54	YBR073W	4163.32	0.984084	0.0210354	NA	0SD
TS_7	D8	CAGL0I09922g	GNT1	YOR320C	4173.7	0.984997	0.0368717	-0.0594704	0SD
TS_5	B3	CAGL0K08228g	YKR051W	YKR051W	4189.23	0.985423	0.0231873	0.0328141	0SD
TS_6	D10	CAGL0J04312g	PEP1	YBL017C	4152.8	0.985531	0.0115827	NA	0SD
TS_1	F11	CAGL0G02827g	SLM1	YIL105C	4111.56	0.986133	0.0183576	0.00603484	0SD
TS_2	C1	CAGL0J11770g	PLB1	YMR008C	4111.69	0.986158	0.0188002	0.0247548	0SD
TS_5	D11	CAGL0A00143g	MPC54	YOR177C	4190.4	0.986738	0.0430373	0.0564092	0SD
TS_1	F7	CAGL0G01056g	GAS2	YLR343W	4105.31	0.987108	0.00907162	0.00507123	0SD
2A_BM	C10	CAGL0K08756g	YAP7	YOL028C	4111.6	0.987581	0.023328	0.0356144	0SD
TS_1	G7	CAGL0G09020g	TPK2	YPL203W	5699.87	0.987772	0.0162362	NA	0SD
TS_6	G1	CAGL0K12254g	VID24	YBR105C	4154.4	0.988108	0.0149925	-0.00619997	0SD
1A_BM	C10	CAGL0D02904g	PPR1	YLR014C	4152.64	0.988134	0.0268241	0.020005	0SD
1A_BM	C9	CAGL0D02486g	RDS1	YCR106W	4151.81	0.98816	0.0200515	0.0313278	0SD
TS_5	D3	CAGL0M03157g	TAX4	YJL083W	4174.76	0.988537	0.0194998	0.00470089	0SD
1A_BM	C8	CAGL0D01430g	HOS1	YPR068C	4153.98	0.989013	0.041262	0.0250795	0SD
TS_7	E1	CAGL0J08778g	SEC13	YLR208W	4152.91	0.989039	0.0272675	0.0308737	0SD
1A_BM	E9	CAGL0F05621g	HST4	YDR191W	4150.75	0.989073	0.0355883	0.0176243	0SD
TS_6	A7	CAGL0B03355g	DPB3	YBR278W	4171.02	0.989175	0.0154955	0.00689797	0SD
TS_2	F1	CAGL0M01826g	ECM33	YBR078W	3966.94	0.989203	0.0588351	0.0677334	0SD
1A_BM	B11	CAGL0C02519g	MIG3	YER028C	4147.54	0.989337	0.0302498	0.0196509	0SD
2A_BM	B9	CAGL0J10472g	SSN2	YDR443C	4103.12	0.989407	0.0330861	-0.0421402	0SD
TS_5	D10	CAGL0M13805g	SCW4	YGR279C	4167.81	0.9902	0.0139743	0.0214769	0SD
TS_3	B10	CAGL0G02497g	MLP1	YKR095W	3883.28	0.99021	0.0215537	0.00367387	0SD
TS_1	C7	CAGL0D06204g	RIM8	YGL045W	4067.42	0.990259	0.00753383	NA	0SD
TS_6	F9	CAGL0M03707g	MON2	YNL297C	4182.1	0.990282	0.0233298	NA	0SD
2A_BM	D10	CAGL0L03377g	SIP4	YJL089W	4099.75	0.990349	0.0190151	0.0320838	0SD
TS_4	G7	CAGL0M07381g	KTR6	YPL053C	4029.31	0.990413	0.026801	0.0348884	0SD
TS_3	E8	CAGL0J07282g	GPB1	YOR371C	3917.2	0.990532	0.0235255	0.0347363	0SD
TS_1	D7	CAGL0E06666g	MUC1	YIR019C	4090.27	0.990626	0.0119131	0.0119963	0SD
2A_BM	C8	CAGL0K08624g	HAP4	YKL109W	4100.79	0.990628	0.0297249	0.0498364	0SD
TS_2	B2	CAGL0I08503g	MET16	YPR167C	4093.47	0.990998	0.0334092	0.0267887	0SD
1A_BM	E6	CAGL0F03047g	SIP1	YDR422C	4141.35	0.99112	0.0310347	0.0396348	0SD
TS_4	H10	CAGL0J02134g	INP51	YIL002C	4025.93	0.991161	0.0149786	0.0193478	0SD
2A_BM	D5	CAGL0L01903g	RGT1	YKL038W	4094.15	0.991173	0.00280107	-0.00205363	0SD
TS_5	A12	CAGL0K06127g	ECM11	YDR446W	4160.98	0.991683	0.0361405	-0.00738119	0SD
TS_2	D1	CAGL0K11902g	LYS14	YDR034C	3956.07	0.991805	0.0389527	0.0102822	0SD
TS_9	E11	CAGL0I04664g	FIG1	YBR040W	4150.54	0.99203	0.0607507	0.0899709	0SD
TS_2	A5	CAGL0I04862g	SNQ2	YDR011W	4085.21	0.992227	0.0133027	0.00771303	0SD
TS_7	H4	CAGL0E06006g	MMT2	YPL224C	4146.82	0.992689	0.0521614	-0.0561502	0SD
TS_4	F2	CAGL0F06501g	ECM40	YMR062C	4019.74	0.992787	0.0265436	0.0241095	0SD
TS_6	A11	CAGL0C02739g	FUN14	YAL008W	4122.15	0.992903	0.00901777	NA	0SD
TS_7	G5	CAGL0C03333g	FRE6	YLL051C	4135.14	0.992971	0.0181028	-0.0257857	0SD
TS_2	E2	CAGL0L05632g	PBS2	YJL128C	3872.83	0.993037	0.0300774	0.0253452	0SD
TS_5	B10	CAGL0L03608g	BCH2	YKR027W	4120.82	0.99306	0.0249376	NA	0SD
TS_6	B1	CAGL0D01210g	ROK1	YGL171W	4154.68	0.993289	0.0166906	-0.00835151	0SD
TS_1	B11	CAGL0D01936g	SNF7	YLR025W	4081.11	0.993376	0.0309081	0.0378605	0SD
TS_4	A5	CAGL0L00583g	USV1	YPL230W	3906.93	0.994045	0.0507107	0.0430571	0SD
TS_5	A10	CAGL0K04455g	SPR3	YGR059W	4149.68	0.994108	0.0170815	-0.0067665	0SD
TS_3	A6	CAGL0J03828g	MKK2	YPL140C	3873.98	0.994167	0.0209481	0.02197	0SD
TS_2	G5	CAGL0M08184g	STE3	YKL178C	3927.07	0.994252	0.0290601	0.0265425	0SD
TS_7	B9	CAGL0F04741g	CMK2	YOL016C	4130.14	0.994285	0.0145961	0.000114118	0SD
TS_7	H9	CAGL0A03476g	SMF3	YLR034C	4128.05	0.994523	0.0145877	0.0188615	0SD
TS_2	G10	CAGL0M10791g	SSK2	YNR031C	3866.79	0.994847	0.0235324	0.0206329	0SD
TS_1	F5	CAGL0F09229g	YER184C	YER184C	4048.53	0.995228	0.0173213	NA	0SD
TS_7	A2	CAGL0G02607g	PRK1	YIL095W	4128.4	0.995411	0.0375997	0.0329566	0SD
TS_5	A6	CAGL0J08910g	CRR1	YLR213C	4144.74	0.995465	0.0130559	0.00718116	0SD
TS_5	G7	CAGL0D06534g	SRB4	YER022W	4142.81	0.995741	0.0108122	-0.00567417	0SD
TS_4	C7	CAGL0B00528g	LRE1	YCL051W	4007.63	0.9959	0.024988	0.0407595	0SD
1A_BM	E10	CAGL0F05995g	MSN4	YKL062W	4122.96	0.99597	0.0372011	0.0270012	0SD
TS_7	F6	CAGL0M07656g	ERG5	YMR015C	4120.66	0.996166	0.0155092	0.00336028	0SD
TS_2	F6	CAGL0M03663g	RIM21	YNL294C	3927.62	0.99621	0.0286964	0.0246421	0SD
TS_1	E4	CAGL0F04081g	TEC1	YBR083W	4070.34	0.996501	0.0326183	0.0303804	0SD
TS_3	B7	CAGL0K04037g	GSC2	YGR032W	3893.21	0.996673	0.0362124	0.0395895	0SD
TS_7	G9	CAGL0M07942g	FRE8	YLR047C	4124.27	0.996765	0.0388838	-0.0645686	0SD
TS_4	G11	CAGL0I06160g	CIS3	YJL158C	4004.83	0.99722	0.026901	0.0306308	0SD
TS_5	F7	CAGL0C02915g	DAL80	YKR034W	4144.19	0.997311	0.0361231	0.0246041	0SD
TS_6	G3	CAGL0L06798g	MDH3	YDL078C	4151.9	0.997321	0.0129961	NA	0SD
TS_1	H5	CAGL0H03861g	HRB1	YNL004W	4067.72	0.997382	0.0286138	0.00243566	0SD
TS_1	B6	CAGL0C02211g	UTR2	YEL040W	4065.23	0.997617	0.0341582	0.0492953	0SD
TS_2	E5	CAGL0L07744g	ADP1	YCR011C	3896.32	0.997864	0.0312895	0.0327784	0SD
TS_3	A9	CAGL0G00858g	MID2	YLR332W	3872.14	0.997958	0.0281033	0.0353674	0SD
TS_2	A7	CAGL0I05236g	BCY1	YIL033C	4063.81	0.998421	0.0343085	0.00518709	0SD
TS_3	A4	CAGL0G04873g	ROM2	YLR371W	3861.63	0.99858	0.00782407	NA	0SD
TS_4	F10	CAGL0G06072g	ECM14	YHR132C	4000.84	0.998619	0.0355087	0.0444214	0SD
1A_BM	D4	CAGL0E01331g	SWI5	YDR146C	4106.1	0.998794	0.0255748	0.0108107	0SD
2A_BM	F10	CAGL0M01716g	TEC1	YBR083W	4069.97	0.998795	0.0390526	0.0601075	0SD
1A_BM	B3	CAGL0B02651g	MET32	YDR253C	4107.43	0.99891	0.0273431	-0.0180273	0SD
TS_1	G1	CAGL0G04125g	SAG1	YJR004C	4034.95	0.999289	0.0348009	NA	0SD
TS_1	A7	CAGL0B00858g	STE50	YCL032W	4053.84	0.999713	0.0165962	0.020846	0SD
1A_BM	E11	CAGL0F06039g	SUB1	YMR039C	4103.59	0.99975	0.0263736	-0.00356872	0SD
TS_1	A12	CAGL0B03421g	HAP1	YLR256W	4053.39	0.99976	0.0137877	0.0112871	0SD
TS_4	C8	CAGL0B01969g	ECM18	YDR125C	3988.62	1.00021	0.0184088	0.0215784	0SD
TS_1	C2	CAGL0D02904g	PPR1	YLR014C	4052.25	1.00027	0.0202602	0.0215576	0SD
TS_2	C3	CAGL0K01331g	SIT4	YDL047W	4052.71	1.00041	0.0175273	0.0171354	0SD
TS_1	E7	CAGL0F06545g	RIM9	YMR063W	4048.74	1.00077	0.00599942	0.0054968	0SD
TS_4	C4	CAGL0A01584g	AGA2	YGL032C	3875.67	1.00092	0.0317033	0.0314674	0SD
TS_1	B10	CAGL0C03872g	TIR3	YIL011W	4049.04	1.00098	0.0175693	0.0158898	0SD
TS_2	F10	CAGL0M04565g	ACF2	YLR144C	3891.99	1.0011	0.0294661	0.0336813	0SD
1A_BM	B2	CAGL0B01947g	INO2	YDR123C	4096.89	1.00126	0.0327159	-0.0227423	0SD
1A_BM	A6	CAGL0A03322g	HOS2	YGL194C	4096.44	1.00133	0.0320068	-0.0218222	0SD
TS_2	G8	CAGL0M09207g	STE18	YJR086W	3889.93	1.00162	0.0469642	0.0339994	0SD
2A_BM	D9	CAGL0L03157g	GZF3	YJL110C	4053.64	1.00182	0.023341	0.0355436	0SD
TS_3	B8	CAGL0D02794g	WSC4	YHL028W	3855.19	1.00187	0.0277593	0.0185503	0SD
2A_BM	C9	CAGL0K08668g	MET28	YIR017C	4050.66	1.00243	0.0282933	0.0290897	0SD
TS_7	G4	CAGL0K12738g	FET5	YFL041W	4096.6	1.00244	0.0238533	-0.0323418	0SD
1A_BM	D11	CAGL0E04488g	AHC1	YOR023C	4092.62	1.00245	0.0180932	0.00458529	0SD
TS_2	B12	CAGL0J11748g	PLB2	YMR006C	4045.2	1.00252	0.0273339	0.00848917	0SD
TS_1	E3	CAGL0F03883g	GAS3	YMR215W	4015.87	1.00282	0.0163122	NA	0SD
TS_7	E3	CAGL0G07887g	VOA1	YGR106C	4129.07	1.00285	0.00925819	NA	0SD
TS_6	G5	CAGL0F02431g	ACO2	YJL200C	4091.38	1.00332	0.018791	0.0129037	0SD
TS_7	E9	CAGL0C04048g	MNT3	YIL014W	4098.26	1.00338	0.0449675	-0.00672566	0SD
2A_BM	E11	CAGL0L11704g	SPT2	YER161C	4045.25	1.00339	0.01129	0.0167057	0SD
2A_BM	A9	CAGL0I10769g	MCM1	YMR043W	4043.9	1.00351	0.0194982	-0.0318652	0SD
TS_3	B1	CAGL0J00539g	SLT2	YHR030C	3881.93	1.00365	0.0270891	0.0418237	0SD
TS_6	G11	CAGL0H06633g	PCK1	YKR097W	4094.18	1.00366	0.0308286	0.0198641	0SD
TS_5	A7	CAGL0J09416g	SNA4	YDL123W	4110.66	1.00376	0.00735946	0.00551134	0SD
2A_BM	C11	CAGL0K09372g	MIG2	YGL209W	4045.34	1.00394	0.0308535	0.0377137	0SD
2A_BM	E10	CAGL0L09691g	PUT3	YKL015W	4042.2	1.00429	0.0162959	-0.0016233	0SD
TS_4	G1	CAGL0H00847g	HUT1	YPL244C	3979.47	1.00438	0.0404815	0.0516246	0SD
TS_6	B6	CAGL0F00209g	SEO1	YAL067C	4107.34	1.00441	0.0132475	-0.012307	0SD
TS_9	B9	CAGL0L01463g	ERM6	YJR054W	4087.44	1.00447	0.0104362	-0.00750755	0SD
TS_2	F5	CAGL0M03597g	MID1	YNL291C	3895.08	1.00448	0.0307432	0.00469768	0SD
2A_BM	B3	CAGL0J06974g	HOS3	YPL116W	4043.85	1.00464	0.0313937	0.0167905	0SD
TS_2	A3	CAGL0I03498g	STE7	YDL159W	4035.2	1.00479	0.0232488	0.0197556	0SD
1A_BM	C4	CAGL0D00462g	ASH1	YKL185W	4083.36	1.00486	0.0218541	0.028738	0SD
TS_6	D3	CAGL0L06226g	HEK2	YBL032W	4072.78	1.00496	0.00781336	NA	0SD
TS_6	E5	CAGL0A02431g	YPS7	YDR349C	4101.91	1.0056	0.0136156	-0.0122842	0SD
TS_9	C8	CAGL0L01551g	SUR7	YML052W	4116.4	1.00604	0.0214193	NA	0SD
2A_BM	F4	CAGL0L12782g	DIG1	YPL049C	4037.95	1.00611	0.0304812	0.0157298	0SD
TS_4	F6	CAGL0G02101g	ECM4	YKR076W	3961.43	1.00691	0.0239672	0.00596498	0SD
TS_6	H4	CAGL0H09460g	FAA2	YER015W	4082.71	1.00721	0.0505164	0.0751365	0SD
TS_5	D7	CAGL0M08492g	PIR1	YKL164C	4095.44	1.00737	0.0186024	0.0109881	0SD
TS_1	D12	CAGL0F02519g	YJL206C	YJL206C	4022.41	1.00755	0.0112847	0.00064005	0SD
TS_1	E9	CAGL0F06677g	GPA1	YHR005C	4019.15	1.00818	0.0079653	0.00109282	0SD
TS_5	H7	CAGL0E06094g	FZF1	YGL254W	4089.99	1.0087	0.00954075	-0.0157534	0SD
TS_5	H9	CAGL0E06622g	KEG1	YFR042W	4091.24	1.00889	0.0190493	-0.0190571	0SD
1A_BM	A9	CAGL0A04455g	SEF1	YBL066C	4065.07	1.0089	0.0268931	-0.0306682	0SD
TS_1	C1	CAGL0D02882g	SSK1	YLR006C	4022.57	1.0091	0.0462358	0.0322008	0SD
TS_1	E8	CAGL0F06655g	AVO2	YMR068W	3965.66	1.01	0.0130781	NA	0SD
TS_9	H5	CAGL0M13321g	SVP26	YHR181W	4059.05	1.0102	0.0197918	-0.00441731	0SD
TS_7	B8	CAGL0K10604g	CMK2	YOL016C	4063.45	1.01073	0.0234139	0.00415675	0SD
TS_1	F4	CAGL0F09053g	MNL1	YHR204W	4010.32	1.01081	0.0124835	0.0146025	0SD
TS_2	A9	CAGL0I06138g	FAR1	YJL157C	4010.54	1.01109	0.0302598	0.0114513	0SD
2A_BM	D1	CAGL0K11396g	SIR4	YDR227W	4012.91	1.01118	0.011459	-0.0195076	0SD
TS_1	A6	CAGL0A04455g	SEF1	YBL066C	4005.7	1.01162	0.0196776	0.00499593	0SD
TS_5	F3	CAGL0C01111g	PPZ1	YML016C	4080.32	1.01199	0.0240724	0.0150436	0SD
TS_7	G11	CAGL0M05511g	FTH1	YBR207W	4058.39	1.01242	0.0312346	0.0139326	0SD
TS_4	F9	CAGL0G05918g	CHS7	YHR142W	3942.29	1.01261	0.0226943	0.0220399	0SD
2A_BM	E4	CAGL0L06842g	THI3	YDL080C	4010.51	1.01261	0.0268021	0.00254496	0SD
1A_BM	A11	CAGL0B00462g	KAR4	YCL055W	4049.26	1.01263	0.0105148	-0.0168594	0SD
TS_4	D12	CAGL0E02761g	LDB7	YBL006C	3940.14	1.01284	0.0144797	0.00198088	0SD
TS_1	H3	CAGL0H02563g	HOR7	YMR251W-A	4003.01	1.01289	0.0201496	0.00263598	0SD
TS_1	F9	CAGL0G01386g	SLM1	YIL105C	3999.6	1.01307	0.00632357	0.00204256	0SD
TS_5	H10	CAGL0F00341g	YKL105C	YKL105C	4069.95	1.0136	0.00796902	0.00566839	0SD
TS_9	B5	CAGL0J08371g	PRM1	YNL279W	4048.74	1.01439	0.0244391	-0.0251257	0SD
TS_4	A12	CAGL0J08712g	FUN26	YAL022C	3796.68	1.0144	0.0183257	0.00530691	0SD
TS_2	F7	CAGL0M03773g	YNL300W	YNL300W	3711.07	1.01506	0.0519623	0.00196988	0SD
1A_BM	D9	CAGL0E03762g	RIM101	YHL027W	4041.31	1.01521	0.0387622	-0.0413329	0SD
TS_9	G1	CAGL0L01485g	GSF2	YML048W	4049.55	1.01554	0.0427883	-0.0693929	0SD
TS_1	G11	CAGL0H00396g	LEU3	YLR451W	3965.37	1.01559	0.0198561	NA	0SD
TS_3	B12	CAGL0B04389g	CHS3	YBR023C	3807.41	1.01592	0.0308265	0.00774236	0SD
2A_BM	C7	CAGL0K07634g	GAT1	YFL021W	4001.57	1.01602	0.0397859	0.054142	0SD
2A_BM	E6	CAGL0L08668g	HST2	YPL015C	3993.22	1.0165	0.011835	0.00490559	0SD
TS_7	C11	CAGL0G07040g	OST6	YML019W	4036.71	1.01691	0.0155203	0.00512113	0SD
TS_1	C9	CAGL0E00385g	MDL1	YLR188W	3986.04	1.01695	0.0116806	0.00571841	0SD
TS_5	G12	CAGL0E02211g	CBS2	YDR197W	4059.22	1.01698	0.023659	-0.0333386	0SD
TS_1	A10	CAGL0B02211g	CCH1	YGR217W	3986.04	1.0171	0.0295559	0.0482381	0SD
2A_BM	E8	CAGL0L09339g	HAA1	YPR008W	3994.28	1.01711	0.0373753	0.00075253	0SD
TS_5	G5	CAGL0D05654g	SDS23	YGL056C	4058.11	1.01714	0.0261447	-0.043736	0SD
2A_BM	A7	CAGL0I07755g	HAL9	YOL089C	3991.05	1.01722	0.0277602	-0.0281099	0SD
TS_9	A7	CAGL0I07491g	IZH1	YDR492W	4035.19	1.0173	0.0114347	-0.00903978	0SD
TS_1	F1	CAGL0F07865g	UPC2	YDR213W	3983.74	1.01754	0.0123427	0.00370178	0SD
2A_BM	D2	CAGL0K11902g	LYS14	YDR034C	3992.22	1.01774	0.0501566	-0.0831944	0SD
TS_3	A3	CAGL0G04125g	SAG1	YJR004C	3824.88	1.01787	0.0499336	0.0329954	0SD
1A_BM	A12	CAGL0B01188g	TOS4	YLR183C	4029.21	1.01797	0.027806	-0.0359884	0SD
TS_2	A11	CAGL0I07755g	HAL9	YOL089C	3983.36	1.01814	0.0285836	0.0410237	0SD
TS_4	D9	CAGL0D06622g	SPA2	YLL021W	3918.58	1.01825	0.0301284	0.0171023	0SD
TS_5	H2	CAGL0E03135g	MDL2	YPL270W	4053.16	1.0183	0.0333538	-0.0388532	0SD
TS_2	A4	CAGL0I04092g	SHE10	YGL228W	3979.13	1.01853	0.0160069	0.00333078	0SD
TS_5	E7	CAGL0A04763g	FRE7	YOL152W	4052.53	1.01868	0.0206969	0.00290846	0SD
TS_5	F10	CAGL0C05401g	NMA1	YLR328W	4052.71	1.01906	0.0362805	-0.0367513	0SD
1A_BM	B4	CAGL0B03421g	HAP1	YLR256W	4024.06	1.01921	0.0158783	0.0221512	0SD
TS_4	B2	CAGL0M08250g	ZRT3	YKL175W	3794.52	1.01926	0.0457101	0.0405015	0SD
TS_4	G4	CAGL0H06435g	ECM19	YLR390W	3913.7	1.01942	0.0229074	0.00285542	0SD
2A_BM	E9	CAGL0L09383g	SUT1	YGL162W	3978.56	1.01993	0.0141501	-0.011214	0SD
1A_BM	A8	CAGL0A04235g	SAS3	YBL052C	4019.32	1.02015	0.0179401	-0.00263828	0SD
TS_6	A6	CAGL0B02651g	MET32	YDR253C	4045.82	1.02027	0.0246989	-0.0167845	0SD
TS_4	F8	CAGL0G05566g	FMP45	YDL222C	3917.25	1.02031	0.036641	0.014243	0SD
TS_1	E6	CAGL0F05995g	MSN4	YKL062W	3971.13	1.02034	0.0150854	0.00137397	0SD
1A_BM	H2	CAGL0H06677g	IMP2'	YIL154C	4018.45	1.0205	0.0182523	-0.0300618	0SD
TS_5	G11	CAGL0E01375g	MUK1	YPL070W	4046.41	1.0206	0.0272072	-0.00264918	0SD
TS_2	E4	CAGL0L07656g	GLO1	YML004C	3794.16	1.02104	0.0415017	0.0681824	0SD
TS_3	B6	CAGL0M13827g	FKS3	YMR306W	3753.38	1.02155	0.047782	0.0309348	0SD
TS_2	C8	CAGL0K06985g	ERT1	YBR239C	3824.24	1.02158	0.0284403	0.015116	0SD
TS_5	C11	CAGL0M00748g	ECM7	YLR443W	4041.55	1.02163	0.0401175	-0.0691259	0SD
TS_9	B1	CAGL0I10494g	NCE102	YPR149W	4021.53	1.02166	0.0276408	-0.044494	0SD
TS_1	B12	CAGL0D02530g	EGT2	YNL327W	3965.89	1.02166	0.00959801	0.00229005	0SD
TS_2	C10	CAGL0K10164g	SED1	YDR077W	3768.72	1.02186	0.0346074	0.00990615	0SD
TS_5	G10	CAGL0E00165g	CYC2	YOR037W	4007.4	1.02188	0.0104704	NA	0SD
TS_1	H2	CAGL0H01683g	URC2	YDR520C	3965.85	1.02198	0.0139763	0.00407189	0SD
TS_4	D10	CAGL0E01353g	ZRT2	YLR130C	3907.19	1.02226	0.0446141	0.0425005	0SD
TS_2	D3	CAGL0K12430g	STE2	YFL026W	3805.26	1.02275	0.0231238	0.0214157	0SD
TS_1	A8	CAGL0B00968g	FUS1	YCL027W	3960.86	1.0231	0.00780952	0.0062944	0SD
TS_5	E3	CAGL0A02299g	CTF4	YPR135W	4034.07	1.02332	0.0310112	-0.0530409	0SD
TS_2	G9	CAGL0M09669g	RIM13	YMR154C	3809.95	1.02378	0.0252426	0.00679119	0SD
TS_5	F11	CAGL0D00396g	PSF2	YJL072C	4029.26	1.02403	0.00665356	-0.00203024	0SD
1A_BM	B6	CAGL0B04895g	RFX1	YLR176C	4009.36	1.02407	0.0351567	0.0545119	0SD
1A_BM	A7	CAGL0A03696g	GAL83	YER027C	4007.55	1.02424	0.0505082	-0.0478765	0SD
2A_BM	B12	CAGL0K04257g	RME1	YGR044C	3962.89	1.02432	0.035411	-0.0484704	0SD
1A_BM	E7	CAGL0F03069g	CAD1	YDR423C	4004.96	1.02447	0.0242966	0.0243121	0SD
TS_5	E6	CAGL0A04609g	LST4	YKL176C	4032.34	1.02468	0.0439619	-0.0514417	0SD
1A_BM	E12	CAGL0F06237g	MCM1	YMR043W	4001.81	1.02489	0.0181853	0.01466	0SD
2A_BM	C12	CAGL0K09900g	HAP5	YOR358W	3959.76	1.02503	0.028899	-0.0239232	0SD
TS_5	F8	CAGL0C03311g	COG1	YGL223C	4024.45	1.0251	0.00843896	-0.00764358	0SD
TS_4	G3	CAGL0H05005g	CSR1	YLR380W	3894.14	1.02521	0.0245959	0.00672109	0SD
2A_BM	E3	CAGL0L06028g	GTS1	YGL181W	4018.82	1.02572	0.00062902	NA	0SD
TS_1	G8	CAGL0G09449g	CRH1	YGR189C	3951.29	1.02586	0.0206358	0.0252951	0SD
2A_BM	B2	CAGL0J06182g	SKO1	YNL167C	3957.71	1.02591	0.0279334	0.000156274	0SD
TS_1	F6	CAGL0G00242g	YOR1	YGR281W	3951.92	1.02594	0.0242015	0.0103608	0SD
TS_9	H6	CAGL0D03146g	SYS1	YJL004C	3953.86	1.02635	0.0150181	-0.0119667	0SD
TS_2	B5	CAGL0J04290g	FUS3	YBL016W	4093.37	1.02654	0.0502786	0.0732483	0SD
TS_5	H3	CAGL0E03498g	SMF1	YOL122C	4017.46	1.02697	0.0122919	0.013007	0SD
1A_BM	E8	CAGL0F04081g	TEC1	YBR083W	3993.4	1.02738	0.021127	0.000251655	0SD
TS_5	F6	CAGL0C02365g	MET4	YNL103W	4022.34	1.0275	0.0506468	0.00471797	0SD
TS_2	E12	CAGL0M01760g	PDR5	YOR153W	3775.24	1.02752	0.0283492	0.0494306	0SD
TS_4	G2	CAGL0H01287g	SSD1	YDR293C	3883.53	1.02776	0.025497	0.0252866	0SD
TS_6	A2	CAGL0K02145g	COM2	YER130C	3989.07	1.02782	0.0355827	NA	0SD
TS_6	C5	CAGL0I10769g	MCM1	YMR043W	4014.78	1.02805	0.0134448	0.00755024	0SD
TS_2	C2	CAGL0K00363g	STE6	YKL209C	3941.38	1.02827	0.0092002	0.00948006	0SD
TS_7	A8	CAGL0K00693g	SWE1	YJL187C	3991.09	1.02875	0.0156748	0.00781447	0SD
TS_2	D10	CAGL0L03377g	SIP4	YJL089W	3761.12	1.02923	0.0613708	0.0584978	0SD
TS_1	D9	CAGL0F01419g	AUS1	YOR011W	3938.47	1.02924	0.0299733	0.0405121	0SD
TS_4	H9	CAGL0J00803g	MHP1	YJL042W	3878.53	1.02946	0.0273187	0.0333637	0SD
TS_4	F11	CAGL0G06754g	CDC10	YCR002C	3878.9	1.02969	0.0380779	0.00419899	0SD
TS_1	C12	CAGL0E03355g	BPT1	YLL015W	3911.43	1.02974	0.0288792	NA	0SD
TS_5	F1	CAGL0C00803g	MET31	YPL038W	4005.74	1.02999	0.0251275	-0.020304	0SD
2A_BM	A8	CAGL0I08085g	EMI5	YOL071W	3939.49	1.03001	0.0134923	-0.0213502	0SD
TS_7	G6	CAGL0M07942g	FRE8	YLR047C	3986.84	1.03004	0.0278661	-0.0199065	0SD
TS_6	F2	CAGL0G03267g	AST1	YBL069W	4002.39	1.03091	0.0118496	0.0197607	0SD
TS_6	E4	CAGL0J02288g	BAR1	YIL015W	4002.82	1.03093	0.033852	-0.0138285	0SD
TS_2	B3	CAGL0I09416g	BIT2	YBR270C	3931.46	1.031	0.0153199	0.0132029	0SD
2A_BM	D8	CAGL0L02739g	SAS5	YOR213C	3937.16	1.03185	0.0320255	0.0525444	0SD
2A_BM	H1	CAGL0M08800g	YAP6	YDR259C	3927.28	1.03324	0.00762173	-0.0103222	0SD
TS_4	E2	CAGL0E02915g	SCW11	YGL028C	3858.68	1.03383	0.0149381	0.0127445	0SD
TS_4	C9	CAGL0B04389g	CHS3	YBR023C	3864.43	1.03394	0.0464928	0.070931	0SD
2A_BM	G3	CAGL0M03025g	CAT8	YMR280C	3923.69	1.03478	0.024958	0.0299306	0SD
TS_6	H7	CAGL0B04147g	DBF20	YPR111W	4001.47	1.03495	0.0225552	NA	0SD
TS_5	H11	CAGL0F00781g	PEX2	YJL210W	3988.36	1.03502	0.0241022	0.00755536	0SD
1A_BM	D12	CAGL0E04884g	ADR1	YDR216W	3961.88	1.03507	0.0230551	-0.0308614	0SD
2A_BM	D12	CAGL0L04400g	YRR1	YOR162C	3918.01	1.03666	0.0437005	-0.072464	0SD
TS_5	C4	CAGL0L08140g	BPH1	YCR032W	3989.99	1.03717	0.0754561	0.0424411	0SD
TS_5	H1	CAGL0E03069g	HXT8	YJL214W	3977.96	1.03754	0.0145107	-0.00420377	0SD
TS_7	E12	CAGL0M00220g	PMT4	YJR143C	3956.29	1.03756	0.017614	0.0192151	0SD
TS_6	G8	CAGL0E01705g	MDH2	YOL126C	3957.47	1.03773	0.0343307	0.0377009	0SD
TS_9	H4	CAGL0L02651g	STE13	YOR219C	3950.75	1.03787	0.0178907	-0.0191054	0SD
TS_4	E12	CAGL0F04521g	ECM13	YBL043W	3846.73	1.03791	0.0305243	0.033139	0SD
TS_4	C6	CAGL0A04411g	SKT5	YBL061C	3847.73	1.03793	0.0347444	0.0215649	>1SD
1A_BM	F4	CAGL0F07865g	UPC2	YDR213W	3950.62	1.03832	0.0206367	-0.0281122	>1SD
TS_6	C12	CAGL0K12320g	AIM3	YBR108W	3972.9	1.03844	0.00596051	0.00438386	>1SD
2A_BM	F11	CAGL0M02563g	UME1	YPL139C	3911.76	1.03866	0.0344365	0.0585602	>1SD
TS_6	G2	CAGL0H03993g	CIT1	YNR001C	3952.05	1.03887	0.0239729	-0.00738551	>1SD
TS_3	A5	CAGL0L03520g	BCK1	YJL095W	3766.13	1.03944	0.0219846	0.0149159	>1SD
TS_9	H9	CAGL0K09988g	TVP23	YDR084C	3908.64	1.03972	0.047891	-0.0514074	>1SD
TS_9	D4	CAGL0G08019g	YDR090C	YDR090C	3951.46	1.03977	0.0274172	-0.0288032	>1SD
TS_6	C7	CAGL0J10582g	PSP2	YML017W	3967.91	1.03987	0.0103852	0.0050674	>1SD
TS_6	E12	CAGL0E04510g	YOR022C	YOR022C	3963.66	1.04096	0.0198615	0.0236306	>1SD
TS_2	E1	CAGL0L04576g	YRR1	YOR162C	3692.68	1.04241	0.0385214	0.0406723	>1SD
TS_3	H12	CAGL0K04169g	KSS1	YGR040W	3674.98	1.04351	0.0262665	NA	>1SD
TS_3	A7	CAGL0H05621g	RLM1	YPL089C	3725.26	1.04385	0.0183083	0.0273754	>1SD
2A_BM	G4	CAGL0M03927g	STB1	YNL309W	3893.19	1.04436	0.0447654	0.0771953	>1SD
TS_9	F7	CAGL0K12914g	EMP47	YFL048C	3931.64	1.04439	0.0289349	0.00268565	>1SD
TS_1	H7	CAGL0H05621g	RLM1	YPL089C	3881.93	1.04444	0.0219548	0.00786938	>1SD
TS_4	G9	CAGL0I00484g	EXG1	YLR300W	3953	1.04527	0.0638871	0.0480977	>1SD
TS_7	F12	CAGL0G09042g	AFT2	YPL202C	3933.93	1.04537	0.050492	-0.0309687	>1SD
TS_1	D3	CAGL0E03982g	YBT1	YLL048C	3876.44	1.04573	0.0269405	0.0246067	>1SD
1A_BM	G3	CAGL0G08107g	GIS1	YDR096W	3921.22	1.04575	0.0100691	-0.0145603	>1SD
2A_BM	G11	CAGL0M06919g	FAP1	YNL023C	3885.53	1.04625	0.0464558	0.0669705	>1SD
1A_BM	H11	CAGL0I02552g	STB5	YHR178W	3919.11	1.04634	0.0251643	-0.0247274	>1SD
TS_6	A9	CAGL0C00583g	SHE3	YBR130C	3948.41	1.04644	0.0340744	0.0113476	>1SD
TS_4	H8	CAGL0J00253g	MTL1	YGR023W	3816.09	1.04669	0.0371527	0.0628247	>1SD
TS_5	D8	CAGL0M09449g	ECM21	YBL101C	3941.45	1.04704	0.0111687	-0.00436607	>1SD
TS_6	H8	CAGL0F03245g	IRE1	YHR079C	3954.35	1.04711	0.00315883	NA	>1SD
1A_BM	A5	CAGL0A01628g	MIG1	YGL035C	3915.62	1.04733	0.0246376	-0.0341376	>1SD
TS_5	C8	CAGL0L11572g	SBE22	YHR103W	3905.9	1.04784	0.011492	NA	>1SD
TS_2	C7	CAGL0K06479g	PKH3	YDR466W	3775.11	1.04817	0.0428746	0.00454334	>1SD
TS_4	B5	CAGL0M05533g	DUR1,2	YBR208C	3669.38	1.04826	0.0263415	0.0276618	>1SD
TS_2	E10	CAGL0L12782g	DIG1	YPL049C	3721.5	1.04873	0.0200199	0.0100297	>1SD
TS_4	B3	CAGL0C00693g	CCC1	YLR220W	3676.76	1.05	0.0152648	0.0108228	>1SD
TS_4	H4	CAGL0G04609g	PKH2	YOL100W	3800.71	1.05058	0.0294876	0.0410016	>1SD
1A_BM	C1	CAGL0C03608g	TUP1	YCR084C	3901.96	1.05097	0.0213721	0.0150972	>1SD
1A_BM	B5	CAGL0B03575g	HAT2	YEL056W	3904.04	1.05106	0.0253319	0.0387548	>1SD
TS_7	H10	CAGL0J08481g	YDR506C	YDR506C	3904.9	1.05175	0.0374871	0.0443526	>1SD
TS_9	G12	CAGL0K00297g	SAC1	YKL212W	3910.68	1.05175	0.0592079	0.0662181	>1SD
1A_BM	F8	CAGL0G02739g	XBP1	YIL101C	3897.05	1.05265	0.0183146	-0.00608948	>1SD
TS_3	E11	CAGL0G09020g	TPK2	YPL203W	3706.95	1.05317	0.0180647	0.000244928	>1SD
TS_6	A5	CAGL0B00440g	UTP14	YML093W	3895.5	1.05325	0.0474838	NA	>1SD
2A_BM	E7	CAGL0L09042g	HAT1	YPL001W	3852.75	1.05375	0.0239577	-0.0214437	>1SD
TS_6	F12	CAGL0I06116g	SSY5	YJL156C	3896.32	1.05437	0.0279775	-0.0456524	>1SD
TS_4	A11	CAGL0E01419g	YPS3	YLR121C	3683.73	1.05504	0.0228347	0.000636948	>1SD
1A_BM	G6	CAGL0G08866g	FKH1	YIL131C	3885.07	1.05554	0.00918397	0.0120419	>1SD
TS_4	F7	CAGL0G02343g	TVP38	YKR088C	3780.45	1.05557	0.019728	0.0103992	>1SD
TS_3	E6	CAGL0L00627g	GPB2	YAL056W	3667.88	1.05596	0.0569337	NA	>1SD
TS_9	E10	CAGL0H02519g	YMR253C	YMR253C	3921.65	1.05611	0.027531	NA	>1SD
2A_BM	F5	CAGL0L13090g	NDT80	YHR124W	3848.03	1.05657	0.0432091	0.0213016	>1SD
2A_BM	F2	CAGL0L12562g	MET31	YPL038W	3840.32	1.05693	0.0120796	0.0171345	>1SD
TS_3	B3	CAGL0L05632g	PBS2	YJL128C	3693.7	1.05746	0.023595	0.00226196	>1SD
TS_7	A9	CAGL0D01694g	SMK1	YPR054W	3880.38	1.05843	0.0311796	0.0420778	>1SD
TS_4	C5	CAGL0A02486g	SBE2	YDR351W	3768.96	1.05844	0.0331744	0.00189562	>1SD
2A_BM	F7	CAGL0M00594g	RSF2	YJR127C	3899.22	1.05883	0.0477481	NA	>1SD
TS_4	A3	CAGL0K03003g	MOT3	YMR070W	3664.95	1.05897	0.0274231	0.00447216	>1SD
TS_7	G10	CAGL0L10868g	FSF1	YOR271C	3873.91	1.05968	0.0178696	0.0123333	>1SD
TS_9	G6	CAGL0K08272g	YSR3	YKR053C	3907.55	1.0598	0.016364	NA	>1SD
1A_BM	F3	CAGL0F07667g	MSS11	YMR164C	3871.93	1.06033	0.0328518	0.0118924	>1SD
TS_9	H2	CAGL0K00649g	SOP4	YJL192C	3873.66	1.06037	0.0343767	0.0516529	>1SD
TS_2	D9	CAGL0L02761g	STE4	YOR212W	3701.18	1.06096	0.0270136	0.0114755	>1SD
TS_6	C9	CAGL0K03245g	YKL105C	YKL105C	3860	1.06103	0.0139676	NA	>1SD
1A_BM	G2	CAGL0G07249g	YOX1	YML027W	3864.44	1.06117	0.0137233	-0.0232266	>1SD
TS_6	D5	CAGL0M12507g	VHR1	YIL056W	3885.62	1.06162	0.024103	0.00143519	>1SD
TS_7	H12	CAGL0L04576g	YRR1	YOR162C	3861.76	1.06294	0.0119436	0.0139146	>1SD
TS_1	G2	CAGL0G05896g	DSE2	YHR143W	3787.52	1.06329	0.0207639	NA	>1SD
TS_2	H8	CAGL0F08371g	TNA1	YGR260W	3647.48	1.06392	0.0185829	NA	>1SD
TS_1	C11	CAGL0E01771g	YPS6	YIR039C	3808.57	1.06403	0.0242524	0.00743526	>1SD
TS_6	E2	CAGL0G02717g	SGA1	YIL099W	3842.68	1.0651	0.0104367	NA	>1SD
TS_5	G8	CAGL0D06666g	TPK2	YPL203W	3869.15	1.0665	0.0278028	-0.0101932	>1SD
TS_6	C4	CAGL0I10538g	SYF2	YGR129W	3842.55	1.06655	0.0289302	NA	>1SD
1A_BM	G9	CAGL0H02959g	CUP9	YPL177C	3844.03	1.06668	0.0168108	-0.0189926	>1SD
1A_BM	H12	CAGL0I04180g	HAA1	YPR008W	3845.14	1.06694	0.0405284	-0.0339828	>1SD
1A_BM	H4	CAGL0H07557g	FZF1	YGL254W	3842.16	1.06718	0.0121756	-0.010857	>1SD
TS_9	G10	CAGL0G08624g	QDR2	YIL121W	3844.59	1.06842	0.038068	0.0437653	>1SD
TS_2	D7	CAGL0L01771g	SOK2	YMR016C	3681.75	1.06856	0.03251	0.00600997	>1SD
TS_4	A1	CAGL0D05434g	ROX1	YPR065W	3743.24	1.06872	0.0780031	0.0825617	>1SD
TS_9	E9	CAGL0K04279g	SCM4	YGR049W	3839.95	1.06915	0.0261353	0.0233128	>1SD
1A_BM	E1	CAGL0E05566g	TYE7	YOR344C	3833.31	1.06967	0.0164253	-0.0136724	>1SD
1A_BM	G4	CAGL0G08646g	POG1	YIL122W	3833.55	1.07096	0.040703	-0.0538695	>1SD
TS_9	D9	CAGL0F03641g	THI74	YDR438W	3860.78	1.07255	0.0105539	NA	>1SD
TS_5	H12	CAGL0F01441g	NIF3	YGL221C	3849.3	1.07306	0.0417456	-0.049224	>1SD
TS_1	F2	CAGL0F07909g	HAL9	YOL089C	3772.89	1.07413	0.0251427	0.00273689	>1SD
TS_1	F3	CAGL0F08833g	MSB2	YGR014W	3746.4	1.07497	0.0177791	NA	>1SD
TS_9	D12	CAGL0E05940g	FLC1	YPL221W	3852.05	1.07497	0.0156006	NA	>1SD
TS_6	F4	CAGL0G09999g	ATG13	YPR185W	3817.89	1.0754	0.0308226	0.0355589	>1SD
TS_2	G1	CAGL0M05907g	OAF3	YKR064W	3657.2	1.07562	0.0396936	0.0474351	>1SD
1A_BM	F2	CAGL0F07315g	SNF4	YGL115W	3810.15	1.07623	0.0126669	-0.0100636	>2SD
TS_4	A10	CAGL0E02321g	PLB3	YOL011W	3643.68	1.07702	0.0372632	0.0549189	>2SD
1A_BM	H6	CAGL0H07843g	HAP2	YGL237C	3804.56	1.07793	0.0299065	-0.0144943	>2SD
1A_BM	H9	CAGL0H08866g	HOT1	YMR172W	3798.51	1.07964	0.0277846	-0.0204069	>2SD
1A_BM	G10	CAGL0H03575g	SPO1	YNL012W	3796.78	1.08117	0.0368974	0.0378418	>2SD
TS_9	E8	CAGL0I00726g	YMR148W	YMR148W	3827.62	1.08193	0.016325	NA	>2SD
TS_1	E1	CAGL0F02717g	PDR15	YDR406W	3736.84	1.08437	0.0222128	0.00765346	>2SD
TS_5	F2	CAGL0C00869g	YKL161C	YKL161C	3800.69	1.08536	0.0247836	-0.00569545	>2SD
2A_BM	G5	CAGL0M04015g	DAL82	YNL314W	3741.65	1.08553	0.0333748	0.0465154	>2SD
2A_BM	H8	CAGL0M13189g	MSN4	YKL062W	3743.5	1.0857	0.0500506	0.0174483	>2SD
TS_9	C5	CAGL0C02717g	SPO7	YAL009W	3780.8	1.08682	0.0303147	-0.0410341	>2SD
1A_BM	F10	CAGL0G03421g	FLO8	YER109C	3778.69	1.08737	0.0455185	0.0368277	>2SD
TS_6	E9	CAGL0H03575g	SPO1	YNL012W	3780.34	1.09125	0.0183892	0.0133143	>2SD
2A_BM	E1	CAGL0L04576g	YRR1	YOR162C	3718.19	1.09135	0.0135952	-0.0230094	>2SD
1A_BM	G8	CAGL0H02145g	STE12	YHR084W	3755.9	1.09233	0.026559	0.0432556	>2SD
TS_9	F2	CAGL0L08294g	AXL2	YIL140W	3787.97	1.09308	0.0032503	NA	>2SD
1A_BM	F1	CAGL0F06743g	DAL81	YIR023W	3747.56	1.09433	0.0271203	-0.00358222	>2SD
TS_9	G8	CAGL0B02475g	PHO84	YML123C	3751	1.0951	0.0347159	0.054451	>2SD
TS_3	E10	CAGL0M08404g	TPK3	YKL166C	3563.21	1.0957	0.0194119	0.0115846	>2SD
1A_BM	G7	CAGL0G09042g	AFT2	YPL202C	3744.41	1.09602	0.033714	0.0105996	>2SD
2A_BM	G7	CAGL0M06325g	RLM1	YPL089C	3700.54	1.09747	0.0304023	0.0383826	>2SD
TS_3	E12	CAGL0K09944g	PDE2	YOR360C	3432.99	1.10193	0.0576115	0.0361596	>2SD
TS_9	C2	CAGL0K00715g	RTA1	YGR213C	3751.55	1.10372	0.0101114	NA	>2SD
1A_BM	G12	CAGL0H05621g	RLM1	YPL089C	3717.2	1.10401	0.0399006	-0.0680117	>2SD
2A_BM	G12	CAGL0M07634g	PHD1	YKL043W	3675.7	1.10444	0.0323018	-0.0250227	>2SD
TS_9	F5	CAGL0K02827g	DID4	YKL002W	3750.4	1.10449	0.0346483	NA	>2SD
TS_5	B11	CAGL0L03696g	ECM3	YOR092W	3734.99	1.10475	0.0243166	-0.00863336	>2SD
TS_7	F9	CAGL0G09515g	EXG1	YLR300W	3742.38	1.10677	0.0317396	NA	>2SD
2A_BM	B1	CAGL0J05060g	ZAP1	YJL056C	3662.45	1.10804	0.0206702	-0.0357837	>2SD
TS_9	F9	CAGL0L11308g	ERV41	YML067C	3710.45	1.116	0.0164175	NA	>3SD
2A_BM	H2	CAGL0M09042g	IME1	YJR094C	3620.43	1.12279	0.0466836	0.0753507	>3SD
2A_BM	H5	CAGL0M10087g	YAP3	YHL009C	3594.97	1.1297	0.028331	0.0450076	>3SD
TS_9	G4	CAGL0K04367g	MUP1	YGR055W	3645.35	1.13664	0.0454602	NA	>3SD
1A_BM	H7	CAGL0H08107g	HMS1	YOR032C	3588.11	1.14292	0.00906643	0.00529545	>3SD
1A_BM	E3	CAGL0F01265g	YAP5	YIR018W	3221.82	1.27545	0.0739099	0.0594664	>3SD
