# Supplementary material for: Systematic Phenotyping of a Large-Scale Candida glabrata Deletion Collection Reveals Novel Antifungal Tolerance Genes
Source: PLoS Pathog. 2014 Jun 19;10(6):e1004211. doi: 10.1371/journal.ppat.1004211 (PMC4063973; doi:10.1371/journal.ppat.1004211)
Supplement: Table S8 — Biofilm raw data - strains with strong variations in relative biofilm fitness. Some 158 deletion strains were excluded from biofilm analysis due to a standard deviation (SD) of more than 0.3 or an absolute difference of more than 0.5 between replicates. (XLS) [file ppat.1004211.s017.xls]

## Sheet: Tabelle1
Table S8. Biofilm raw data - strains with strong variations in relative biofilm fitness.
Set	Position	Cg_ORF	Sc_Gene	Sc_ORF	Clone1_Test1	Clone2_Test1	Clone1_Test2	Clone2_Test2	Mean	SD	Max(diffs)	Plankto class
1A_BM	A6	CAGL0A03322g	HOS2	YGL194C	0.791779	0.930617	0.915478	1.44507	1.02074	0.289643	0.653288	0SD
1A_BM	A7	CAGL0A03696g	GAL83	YER027C	0.883868	0.810981	1.39907	1.07812	1.04301	0.26279	0.588091	0SD
1A_BM	A11	CAGL0B00462g	KAR4	YCL055W	1.23647	0.843609	1.37174	1.1879	1.15993	0.224768	0.528128	0SD
1A_BM	B1	CAGL0B01441g	RPD3	YNL330C	0.836801	1.19876	0.741254	0.671661	0.862118	0.234414	0.527098	<3SD
1A_BM	B2	CAGL0B01947g	INO2	YDR123C	2.66773	3.45361	0.700104	0.678238	1.87492	1.4063	2.77537	0SD
1A_BM	B3	CAGL0B02651g	MET32	YDR253C	1.16138	1.25258	1.14082	1.21263	1.19185	0.0505055	0.111759	0SD
1A_BM	B7	CAGL0C00297g	SET2	YJL168C	0.772059	0.952049	1.21365	1.28352	1.05532	0.236673	0.511457	<2SD
1A_BM	B11	CAGL0C02519g	MIG3	YER028C	1.41228	0.903347	0.978833	1.07584	1.09258	0.224526	0.508932	0SD
1A_BM	B12	CAGL0C03399g	POP2	YNR052C	1.15406	0.702701	0.631223	0.495737	0.74593	0.285302	0.658321	Pb plankto
1A_BM	C1	CAGL0C03608g	TUP1	YCR084C	1.06532	1.23858	1.71831	2.40276	1.60624	0.598546	1.33744	>1SD
1A_BM	C4	CAGL0D00462g	ASH1	YKL185W	0.826258	1.04977	1.30523	1.33711	1.12959	0.239647	0.510851	0SD
1A_BM	C6	CAGL0D01012g	MBP1	YDL056W	0.843312	1.04945	1.27972	1.37771	1.13755	0.2396	0.534398	<2SD
1A_BM	C7	CAGL0D01364g	CYC8	YBR112C	0.830847	1.08312	1.5393	1.43898	1.22306	0.32662	0.708453	<2SD
1A_BM	D1	CAGL0E00561g	TUP1	YCR084C	1.0766	1.3619	1.46011	1.95022	1.46221	0.363738	0.873619	<3SD
1A_BM	D3	CAGL0E00693g	NGG1	YDR176W	0.763315	0.882475	1.03257	1.32801	1.00159	0.24391	0.564699	Pb plankto
1A_BM	D8	CAGL0E03718g	SNF6	YHL025W	0.546147	0.575228	0.580451	0.47365	0.543869	0.0491851	0.106801	Pb plankto
1A_BM	E12	CAGL0F06237g	MCM1	YMR043W	1.01459	1.37565	0.620121	0.726391	0.934189	0.338218	0.755532	0SD
1A_BM	F4	CAGL0F07865g	UPC2	YDR213W	1.23995	1.09784	0.859871	0.975883	1.04338	0.163131	0.380075	>1SD
1A_BM	F5	CAGL0F08283g	GCN5	YGR252W	1.0634	1.4781	0.936596	0.765895	1.061	0.30361	0.7122	Pb plankto
1A_BM	F12	CAGL0G05379g	GCR2	YNL199C	1.5874	1.29024	0.797454	0.673975	1.08727	0.426669	0.913428	0SD
1A_BM	G12	CAGL0H05621g	RLM1	YPL089C	1.13056	0.853766	1.08763	1.00219	1.01854	0.122118	0.27679	>2SD
1A_BM	H12	CAGL0I04180g	HAA1	YPR008W	1.49872	1.01227	0.763408	0.8635	1.03448	0.32595	0.735316	>1SD
1A_BM	E10	CAGL0F05995g	MSN4	YKL062W	1.01782	0.971162	0.827157	1.01652	0.958165	0.0899925	0.190658	0SD
2A_BM	A8	CAGL0I08085g	EMI5	YOL071W	1.05185	0.992263	0.539812	0.564632	0.787139	0.272536	0.512038	0SD
2A_BM	A9	CAGL0I10769g	MCM1	YMR043W	1.236	1.16863	0.659647	0.949824	1.00353	0.259771	0.576356	0SD
2A_BM	A10	CAGL0J03454g	HDA1	YNL021W	1.66035	1.56145	0.984669	1.174	1.34512	0.319048	0.675679	<3SD
2A_BM	A11	CAGL0J03608g	HCM1	YCR065W	1.73274	1.6511	1.11379	1.44693	1.48614	0.275808	0.618958	0SD
2A_BM	A12	CAGL0J04400g	HAP3	YBL021C	1.57727	1.51581	0.882871	0.882742	1.21467	0.384025	0.694524	<1SD
2A_BM	B12	CAGL0K04257g	RME1	YGR044C	1.37468	1.62894	0.96971	1.02729	1.25015	0.309462	0.659229	0SD
2A_BM	C1	CAGL0K04543g	SPT4	YGR063C	0.699575	0.773973	1.3759	0.997942	0.961846	0.303766	0.67632	<1SD
2A_BM	C3	CAGL0K05841g	HAP1	YLR256W	0.847468	0.736904	1.38507	1.18556	1.03875	0.299552	0.648169	Pb plankto
2A_BM	C4	CAGL0K06193g	ADA2	YDR448W	0.853545	0.706447	1.1828	1.20659	0.987345	0.247033	0.500139	Pb plankto
2A_BM	C5	CAGL0K06413g	STP1	YDR463W	0.879934	0.77738	1.36189	1.34722	1.09161	0.306558	0.584511	0SD
2A_BM	C6	CAGL0K07161g	SNF4	YGL115W	0.787348	0.825911	1.30964	1.1938	1.02917	0.261761	0.522291	0SD
2A_BM	C8	CAGL0K08624g	HAP4	YKL109W	0.679508	0.726003	1.39149	1.20948	1.00162	0.353518	0.711983	0SD
2A_BM	D1	CAGL0K11396g	SIR4	YDR227W	1.30171	1.4597	1.21659	0.959036	1.23426	0.209311	0.500665	0SD
2A_BM	D12	CAGL0L04400g	YRR1	YOR162C	1.5479	1.39927	0.895125	0.736672	1.14474	0.389935	0.811227	0SD
2A_BM	E12	CAGL0L11770g	CHD1	YER164W	1.25122		0.797358		1.02429	0.320926	0.453858	0SD
2A_BM	F1	CAGL0L11880g	RPH1	YER169W		1.29243		1.78009	1.53626	0.344827	0.487659	Pb plankto
2A_BM	F3	CAGL0L12650g	SSN3	YPL042C	1.36277	1.12287	1.97369	1.43591	1.47381	0.359075	0.85082	<1SD
2A_BM	F4	CAGL0L12782g	DIG1	YPL049C	0.971623	0.901413	1.10779	0.909104	0.972483	0.0955289	0.20638	0SD
2A_BM	F11	CAGL0M02563g	UME1	YPL139C	1.02844	1.29391	0.750093	0.919394	0.997959	0.228127	0.543817	>1SD
2A_BM	F12	CAGL0M02585g	SPP1	YPL138C	1.43117	1.42263	0.48199	0.560319	0.974027	0.52392	0.949177	<3SD
2A_BM	H2	CAGL0M09042g	IME1	YJR094C	0.853178	1.13962	1.56283	1.43194	1.24689	0.316533	0.709657	>3SD
TS_1	A3	CAGL0A01133g	MDL2	YPL270W	0.873385	1.1728	0.891217	1.43529	1.09317	0.26613	0.561903	<1SD
TS_1	B6	CAGL0C02211g	UTR2	YEL040W	1.15116	1.21873	0.758952	1.46064	1.14737	0.29104	0.701686	0SD
TS_1	B12	CAGL0D02530g	EGT2	YNL327W	1.10171	0.398806	0.750068	0.549252	0.699959	0.30404	0.702904	0SD
TS_1	F1	CAGL0F07865g	UPC2	YDR213W	0.892073	1.25152	1.07015	1.58418	1.19948	0.29548	0.692104	0SD
TS_1	G7	CAGL0G09020g	TPK2	YPL203W	0.137424	0.879114		0.866636	0.627725	0.424659	0.741691	0SD
TS_1	H7	CAGL0H05621g	RLM1	YPL089C	0.905159	1.24069	1.00829	1.60244	1.18915	0.309206	0.69728	>1SD
TS_1	H8	CAGL0H06413g	CCW14	YLR390W-A	1.66725	1.79532	1.33511	1.23089	1.50714	0.267452	0.564431	Pb plankto
TS_1	E6	CAGL0F05995g	MSN4	YKL062W	0.707995	0.548161	0.878701	0.665756	0.700153	0.136901	0.33054	<2SD
TS_1	B2	CAGL0B04521g	RAS1	YOR101W	0.927785		0.741052		0.834419	0.132041	0.186733	<1SD
TS_2	B3	CAGL0I09416g	BIT2	YBR270C	1.20832	1.34676	1.4937	1.71811	1.44172	0.218011	0.509791	0SD
TS_2	H5	CAGL0I10945g	MCA1	YOR197W	1.04979	1.67004	1.66471	1.41484	1.44984	0.292075	0.620253	<1SD
TS_2	B5	CAGL0J04290g	FUS3	YBL016W	2.37572	2.62279	1.71695	2.15355	2.21725	0.384682	0.905848	0SD
TS_2	B10	CAGL0J11308g	NPR1	YNL183C	1.4335	1.74952	1.21668	1.15883	1.38963	0.267473	0.590692	<1SD
TS_2	B12	CAGL0J11748g	PLB2	YMR006C	0.796489	1.48273	1.16978	0.908747	1.08944	0.30529	0.686245	0SD
TS_2	C7	CAGL0K06479g	PKH3	YDR466W	1.17679	0.758996	0.791872	1.30286	1.00763	0.273339	0.54386	>1SD
TS_2	D12	CAGL0L04400g	YRR1	YOR162C	1.16065	1.25234	1.00302	1.09055	1.12664	0.105739	0.249322	0SD
TS_2	E2	CAGL0L05632g	PBS2	YJL128C	0.990102	1.07287	0.991381	1.08137	1.03393	0.0499947	0.0912699	0SD
TS_2	E9	CAGL0L12056g	BMH1	YER177W	1.15256	2.03574	1.47287	1.31607	1.49431	0.383912	0.883174	<1SD
TS_2	E10	CAGL0L12782g	DIG1	YPL049C	1.87722	0.835843	1.37411	1.51429	1.40036	0.43195	1.04138	>1SD
TS_2	F5	CAGL0M03597g	MID1	YNL291C	1.09866	0.593392	1.25459	1.01952	0.991541	0.282828	0.661202	0SD
TS_2	F8	CAGL0M04169g	KRE1	YNL322C	1.37293	1.10834	1.57866	1.68563	1.43639	0.254303	0.577295	<3SD
TS_2	F10	CAGL0M04565g	ACF2	YLR144C	1.19016	1.73475	1.59066	1.86113	1.59418	0.29113	0.670973	0SD
TS_2	H3	CAGL0M13739g	ATM1	YMR301C	0.581025		1.01311		0.797067	0.305529	0.432083	<3SD
TS_3	B12	CAGL0B04389g	CHS3	YBR023C	0.926882	1.43577	1.02431	1.45181	1.20969	0.2733	0.524931	0SD
TS_3	A4	CAGL0G04873g	ROM2	YLR371W	0.766171	2.70958	0.794755		1.4235	1.11387	1.94341	0SD
TS_3	E11	CAGL0G09020g	TPK2	YPL203W	1.3892	1.23176	1.08146	0.824789	1.1318	0.240166	0.564414	>1SD
TS_3	A7	CAGL0H05621g	RLM1	YPL089C	0.769006	0.938512	0.948755	0.97898	0.908813	0.0947747	0.209974	>1SD
TS_3	A12	CAGL0J00253g	MTL1	YGR023W	0.890896	1.07723	1.12351	1.16374	1.06384	0.120596	0.272847	0SD
TS_3	B1	CAGL0J00539g	SLT2	YHR030C	0.672915	0.946645	1.48678	1.18862	1.07374	0.346707	0.813868	0SD
TS_3	E8	CAGL0J07282g	GPB1	YOR371C	1.06747	1.66151	1.51255	1.50436	1.43647	0.256387	0.594042	0SD
TS_3	B3	CAGL0L05632g	PBS2	YJL128C	1.53602	1.42163	0.914561	1.11157	1.24595	0.284535	0.621456	>1SD
TS_3	E10	CAGL0M08404g	TPK3	YKL166C	1.69463	1.54382	1.05382	1.4406	1.43322	0.273594	0.640804	>2SD
TS_3	B6	CAGL0M13827g	FKS3	YMR306W	1.19888	1.4643	0.94962	1.01396	1.15669	0.230692	0.514682	0SD
TS_3	E9	CAGL0B04521g	RAS1	YOR101W	0.933778		1.29221		1.11299	0.25345	0.358433	>1SD
TS_4	C6	CAGL0A04411g	SKT5	YBL061C	0.792428	2.09578	0.581673	0.747811	1.05442	0.700135	1.51411	>1SD
TS_4	C7	CAGL0B00528g	LRE1	YCL051W	1.67356	1.6266	1.0383	0.67168	1.25254	0.483211	1.00188	0SD
TS_4	A4	CAGL0B01441g	RPD3	YNL330C	0.495121	0.630993	0.549846	0.859972	0.633983	0.160667	0.364851	<3SD
TS_4	C8	CAGL0B01969g	ECM18	YDR125C	0.917056	1.43202	0.868331	0.562775	0.945045	0.360529	0.869245	0SD
TS_4	C9	CAGL0B04389g	CHS3	YBR023C	0.840292	0.940242	0.990577	0.667042	0.859538	0.142723	0.323535	0SD
TS_4	C10	CAGL0B04565g	KTR1	YOR099W	1.01227	0.598243	1.46814	0.481431	0.890021	0.447677	0.986705	0SD
TS_4	C11	CAGL0B04631g	INP53	YOR109W	1.0613	0.964883	1.76974	1.07878	1.21868	0.370776	0.804861	<3SD
TS_4	D4	CAGL0C05599g	LRG1	YDL240W	0.641193	0.480604	1.11738	0.748232	0.746853	0.2704	0.636781	<1SD
TS_4	D5	CAGL0D00220g	ECM1	YAL059W	0.725237	0.578151	1.63496	0.824363	0.940678	0.47378	1.05681	<2SD
TS_4	D7	CAGL0D03256g	YEH2	YLR020C	1.13665	0.950142		1.7183	1.26836	0.40066	0.768159	0SD
TS_4	D8	CAGL0D06446g	STT4	YLR305C	1.51577	1.26466	2.10976	2.01232	1.72563	0.402609	0.845103	<2SD
TS_4	D9	CAGL0D06622g	SPA2	YLL021W	1.38194	2.25047	0.905898	1.02734	1.39141	0.607275	1.34457	0SD
TS_4	D10	CAGL0E01353g	ZRT2	YLR130C	1.65463	1.68473	0.748079	0.798679	1.22153	0.518039	0.936654	0SD
TS_4	A11	CAGL0E01419g	YPS3	YLR121C	1.6515	1.53559	1.04651	1.25774	1.37284	0.273178	0.604991	>1SD
TS_4	A10	CAGL0E02321g	PLB3	YOL011W		2.15183	1.55391	1.8775	1.86108	0.299298	0.59792	>2SD
TS_4	D12	CAGL0E02761g	LDB7	YBL006C	1.37163	1.70104	0.540809	0.587921	1.05035	0.577377	1.16023	0SD
TS_4	E1	CAGL0E02783g	SLA1	YBL007C	1.8166	1.95474	0.836016	0.572166	1.29488	0.692935	1.38257	Pb plankto
TS_4	B10	CAGL0E03718g	SNF6	YHL025W	1.28671	0.87651	0.988462	0.773115	0.981198	0.221845	0.513591	Pb plankto
TS_4	E12	CAGL0F04521g	ECM13	YBL043W	0.697792	0.754756	1.47837	1.20306	1.03349	0.372853	0.780579	0SD
TS_4	F2	CAGL0F06501g	ECM40	YMR062C	0.890012	0.944063	1.14276	1.67372	1.16264	0.35763	0.783707	0SD
TS_4	F6	CAGL0G02101g	ECM4	YKR076W	1.45499	1.28726	2.02393	1.4919	1.56452	0.318958	0.736671	0SD
TS_4	F7	CAGL0G02343g	TVP38	YKR088C	1.79433	1.76161	1.11313	0.767936	1.35925	0.50379	1.02639	>1SD
TS_4	H4	CAGL0G04609g	PKH2	YOL100W	0.973874	1.52236	0.779781	1.0066	1.07065	0.31734	0.742579	>1SD
TS_4	F8	CAGL0G05566g	FMP45	YDL222C	1.58992		0.648987	0.661867	0.966923	0.539566	0.940929	0SD
TS_4	F9	CAGL0G05918g	CHS7	YHR142W	1.39449	1.78425	0.699702	0.64316	1.1304	0.553824	1.14109	0SD
TS_4	G2	CAGL0H01287g	SSD1	YDR293C	0.74562	0.845315	1.57049	1.33569	1.12428	0.393701	0.824867	0SD
TS_4	G3	CAGL0H05005g	CSR1	YLR380W	0.600427	0.588961	1.24051	1.18665	0.904138	0.358022	0.65155	0SD
TS_4	G4	CAGL0H06435g	ECM19	YLR390W	0.713407	0.697574	1.51651	1.64692	1.1436	0.508725	0.94935	0SD
TS_4	G6	CAGL0H07403g	KRE2	YDR483W	0.782491	0.634605	1.25573	1.36958	1.0106	0.357007	0.734976	<1SD
TS_4	G10	CAGL0I01188g	CDC12	YHR107C	1.18498		0.610423	0.90494	0.900116	0.287311	0.574561	<2SD
TS_4	G11	CAGL0I06160g	CIS3	YJL158C	1.58045	1.89049	0.598425	0.737499	1.20172	0.631747	1.29207	0SD
TS_4	H6	CAGL0I08855g	KRE11	YGR166W	0.951525	0.64476	1.24569	1.1162	0.989542	0.259468	0.600926	0SD
TS_4	H8	CAGL0J00253g	MTL1	YGR023W	0.57291	0.807242	1.16821	1.4193	0.991916	0.375681	0.846389	>1SD
TS_4	H10	CAGL0J02134g	INP51	YIL002C	0.563883	0.666126	1.3751	1.78082	1.09648	0.581612	1.21694	0SD
TS_4	A12	CAGL0J08712g	FUN26	YAL022C	1.63575	1.1114	1.1149	1.04852	1.22764	0.273776	0.587233	0SD
TS_4	A2	CAGL0K05841g	HAP1	YLR256W	0.872553	0.914333	1.07083	0.991608	0.962331	0.0875467	0.198278	Pb plankto
TS_4	G7	CAGL0M07381g	KTR6	YPL053C	1.57208	1.04973	1.62442	1.395	1.41031	0.259658	0.574694	0SD
TS_5	E2	CAGL0A01892g	DAT1	YML113W	1.01042	1.15994	1.76934	1.71915	1.41471	0.385921	0.758926	<3SD
TS_5	E5	CAGL0A03410g	MLH1	YMR167W	0.737079	0.908595	1.32367	1.43658	1.10148	0.332493	0.699504	0SD
TS_5	E6	CAGL0A04609g	LST4	YKL176C	0.68766	0.790235	1.26533	1.42628	1.04238	0.35893	0.738621	0SD
TS_5	E7	CAGL0A04763g	FRE7	YOL152W	0.758664	0.867167	1.52393	1.24643	1.09905	0.35208	0.76527	0SD
TS_5	G7	CAGL0D06534g	SRB4	YER022W	1.31556	1.19252	0.882111	0.715578	1.02644	0.276068	0.599985	0SD
TS_5	G8	CAGL0D06666g	TPK2	YPL203W	0.96005	0.865686	1.30925	1.45724	1.14806	0.280865	0.59155	>1SD
TS_5	H10	CAGL0F00341g	YKL105C	YKL105C	1.10051	1.31731	0.81554	0.765578	0.999734	0.258048	0.551733	0SD
TS_5	A5	CAGL0J07656g	SLA2	YNL243W	0.963837	1.15521	1.47178	1.00663	1.14937	0.230057	0.507943	<2SD
TS_5	A7	CAGL0J09416g	SNA4	YDL123W	0.805962	1.03035	1.31086	1.18824	1.08385	0.217958	0.504903	0SD
TS_5	A12	CAGL0K06127g	ECM11	YDR446W	0.868484	1.24814	0.754091	0.568342	0.859765	0.286943	0.679802	0SD
TS_5	B2	CAGL0K06963g	ROT2	YBR229C	0.542471	1.10555	0.666815	0.689296	0.751033	0.245006	0.563078	<3SD
TS_5	C6	CAGL0L11528g	BIG1	YHR101C	1.04783	0.68885	0.397417	0.336633	0.617683	0.32537	0.711197	<3SD
TS_5	C9	CAGL0L11880g	RPH1	YER169W	1.14508		1.44395		1.29451	0.211335	0.298872	Pb plankto
TS_5	D4	CAGL0M05489g	KTR3	YBR205W	1.10312	1.10244	0.981298	0.0170854	0.800986	0.525729	1.08603	0SD
TS_5	D8	CAGL0M09449g	ECM21	YBL101C	1.35862	1.2273	1.71229	1.95754	1.56394	0.33287	0.730234	>1SD
TS_6	A6	CAGL0B02651g	MET32	YDR253C	1.34821	1.26082	0.753757	0.922211	1.07125	0.280271	0.594449	0SD
TS_6	G6	CAGL0D06424g	ACO1	YLR304C	0.861153		1.29793		1.07954	0.30885	0.436779	<1SD
TS_6	G8	CAGL0E01705g	MDH2	YOL126C	1.05398	1.69939	0.930793	1.03231	1.17912	0.350979	0.768595	0SD
TS_6	G5	CAGL0F02431g	ACO2	YJL200C	0.798554	1.34852	0.938013	0.947864	1.00824	0.236882	0.549971	0SD
TS_6	B7	CAGL0F03619g	NIP100	YPL174C	1.47113	1.32992	0.802961	0.884874	1.12222	0.328194	0.668167	Pb plankto
TS_6	G11	CAGL0H06633g	PCK1	YKR097W	1.01442	0.98264	0.496411	0.63149	0.781241	0.257222	0.518013	0SD
TS_6	H5	CAGL0H08437g	VPS15	YBR097W	1.80615	0.668408	1.17729	1.38834	1.26005	0.473137	1.13775	<2SD
TS_6	F12	CAGL0I06116g	SSY5	YJL156C	0.966126	1.20955	1.24645	1.58061	1.25069	0.252677	0.614487	>1SD
TS_6	F10	CAGL0I09130g	PTR3	YFR029W	0.847015	1.13937	0.876367	1.40356	1.06658	0.260284	0.556545	<1SD
TS_6	C5	CAGL0I10769g	MCM1	YMR043W	0.594654	0.936803	0.664366	0.942462	0.784571	0.181312	0.347808	0SD
TS_6	D4	CAGL0M08778g	SWM1	YDR260C	1.31583	0.398242	1.23639	1.14658	1.02426	0.423034	0.917586	<2SD
TS_6	D5	CAGL0M12507g	VHR1	YIL056W	1.182	1.00929	2.17912	1.9399	1.57758	0.569373	1.16982	>1SD
TS_7	C12	CAGL0A04587g	ALG3	YBL082C	1.1719	1.16949	0.806818	1.46528	1.15337	0.269561	0.658461	0SD
TS_7	A9	CAGL0D01694g	SMK1	YPR054W	1.16635	0.868664	1.04195	1.76993	1.21172	0.391651	0.90127	>1SD
TS_7	B9	CAGL0F04741g	CMK2	YOL016C	0.955706	0.860267	1.2262	1.4011	1.11082	0.247932	0.540828	0SD
TS_7	A12	CAGL0G02035g	CKA2	YOR061W	0.770237	1.02016	0.982741	1.59743	1.09264	0.354064	0.827189	Pb plankto
TS_7	C11	CAGL0G07040g	OST6	YML019W	1.26821	1.07759	0.629272	0.671358	0.911608	0.312063	0.638942	0SD
TS_7	B2	CAGL0I00946g	CKB2	YOR039W	0.806481	0.710585	1.19463	1.23927	0.987742	0.268167	0.528681	<3SD
TS_7	H10	CAGL0J08481g	YDR506C	YDR506C	1.47334	1.22962	0.62107	0.820263	1.03607	0.386205	0.852268	>1SD
TS_7	E1	CAGL0J08778g	SEC13	YLR208W	0.678013	0.611632	0.9777	1.1523	0.854911	0.254293	0.540669	0SD
TS_7	A8	CAGL0K00693g	SWE1	YJL187C	1.22118	1.52267	1.00115	0.751698	1.12417	0.327658	0.770968	0SD
TS_7	A4	CAGL0K03399g	YPK1	YKL126W	0.959466	1.23097	0.961552	1.49474	1.16168	0.256043	0.535277	Pb plankto
TS_7	D11	CAGL0M00528g	MNS1	YJR131W	0.901647	0.991653	1.39273	1.68253	1.24214	0.362997	0.780883	0SD
TS_7	G11	CAGL0M05511g	FTH1	YBR207W	0.900993	0.870128	1.11564	1.4816	1.09209	0.281696	0.611471	0SD
TS_7	F6	CAGL0M07656g	ERG5	YMR015C	1.81269	1.52401	0.921095	1.0391	1.32423	0.417262	0.891596	0SD
TS_9	G12	CAGL0K00297g	SAC1	YKL212W	1.14612	1.33262	0.871112	0.822234	1.04302	0.239996	0.510382	>1SD
TS_9	F7	CAGL0K12914g	EMP47	YFL048C	1.18604	0.976631	1.47484	1.47864	1.27904	0.243774	0.502011	>1SD	<3SD
TS_9	G1	CAGL0L01485g	GSF2	YML048W	0.915907	0.963111	1.46719	0.874206	1.0551	0.277115	0.592985	0SD	<2SD
