# Supplementary material for: Systematic Phenotyping of a Large-Scale Candida glabrata Deletion Collection Reveals Novel Antifungal Tolerance Genes
Source: PLoS Pathog. 2014 Jun 19;10(6):e1004211. doi: 10.1371/journal.ppat.1004211 (PMC4063973; doi:10.1371/journal.ppat.1004211)
Supplement: Table S9 — Biomass quantification using fluorescein diacetate assay. The table shows the raw data for biofilm analysis, including fitness and standard deviation (SD). Grey font indicates mutants where only a single isolate was obtained. Strains were reliable fitness determination at 30°C was not possible are indicated (Pb plankto). The Planktonic (37°C) column summarizes the results of liquid growth measurements at 37°C (Pb indicates altered growth rate). (XLS) [file ppat.1004211.s018.xls]

## Sheet: Tabelle1
Table S9. Biomass quantification using fluorescein diacetate assay.
Set	Position	Cg_ORF	Sc_Gene	Sc_ORF	Clone1_Test1	Clone2_Test1	Clone1_Test2	Clone2_Test2	Mean	SD	Max(diffs)	Biofilm class	Plankto class	Wilcoxon test	Planktonic (37°C)
TS_4	F1	CAGL0F04873g	KRE6	YPR159W	0.0282451	0.187815	0.0421669	0.167403	0.106407	0.0828329	0.15957	<3SD	Pb plankto
2A_BM	G6	CAGL0M04323g	SWI5	YDR146C		0.16002		0.0702176	0.115119	0.0635003	0.0898029	<3SD	Pb plankto
TS_5	A4	CAGL0J06072g	CBK1	YNL161W	0.220699	0.175969	0.194979	0.142714	0.18359	0.032842	0.0779859	<3SD	<3SD
TS_9	B11	CAGL0D00242g	CNE1	YAL058W	0.309933		0.105947		0.20794	0.14424	0.203987	<3SD	<3SD
2A_BM	B7	CAGL0J10120g	FKH2	YNL068C	0.308307	0.154971	0.257546	0.313799	0.258656	0.0736156	0.158828	<3SD	Pb plankto
TS_4	H9	CAGL0J00803g	MHP1	YJL042W	0.16099	0.197752	0.2788	0.597888	0.308857	0.198873	0.436898	<3SD	0SD	2.88039e-06	OK
TS_4	F11	CAGL0G06754g	CDC10	YCR002C	0.355393	0.52632	0.192281	0.275426	0.337355	0.142495	0.334039	<3SD	0SD	2.88022e-06	Pb
TS_4	H3	CAGL0I07513g	PKH2	YOL100W	0.266035	0.652804	0.170699	0.366967	0.364126	0.20847	0.482105	<3SD	<1SD	2.88004e-06	OK
TS_4	D6	CAGL0D01034g	PSA1	YDL055C	0.402893	0.410792	0.425847	0.258828	0.37459	0.0777598	0.167019	<3SD	<3SD
TS_3	B9	CAGL0F01507g	SLG1	YOR008C	0.450524	0.531435	0.49306	0.514912	0.497483	0.0350296	0.0809112	<3SD	<3SD
TS_7	E12	CAGL0M00220g	PMT4	YJR143C	0.40559	0.731423	0.405374	0.48713	0.507379	0.154242	0.326049	<3SD	0SD	2.88022e-06	Pb
TS_3	A8	CAGL0J11506g	CHS1	YNL192W	0.537303	0.698906	0.60321	0.246573	0.521498	0.194922	0.452333	<3SD	<1SD	0.49829	OK
2A_BM	C2	CAGL0K05797g	EMI1	YDR512C	0.531329	0.333226	0.661344	0.584281	0.527545	0.140114	0.328118	<3SD	<3SD
1A_BM	E11	CAGL0F06039g	SUB1	YMR039C	0.559913	0.554596	0.518182	0.508851	0.535386	0.02563	0.0510624	<3SD	0SD	0.00171348	OK
TS_4	B8	CAGL0L11110g	CNA1	YLR433C	0.70344	0.536591	0.470036	0.521184	0.557813	0.101167	0.233405	<3SD	Pb plankto
TS_7	C2	CAGL0E02629g	ALG6	YOR002W	0.813223	0.473544	0.539858	0.447809	0.568608	0.167623	0.365413	<3SD	Pb plankto
TS_7	C8	CAGL0J08569g	OST3	YOR085W	0.458097	0.562675	0.546437	0.726451	0.573415	0.111895	0.268355	<3SD	Pb plankto
TS_1	F8	CAGL0G01320g	MSG5	YNL053W	0.528294		0.630451		0.579372	0.0722359	0.102157	<3SD	<3SD
TS_6	H6	CAGL0M08910g	SNF1	YDR477W	0.739631	0.819129	0.350778	0.48023	0.597442	0.219047	0.468352	<3SD	Pb plankto
TS_5	A2	CAGL0J05236g	LAS21	YJL062W	0.407431	0.434721	0.882166	0.693216	0.604384	0.225559	0.474736	<3SD	<3SD
TS_3	A5	CAGL0L03520g	BCK1	YJL095W	0.54679	0.574103	0.616649	0.709229	0.611693	0.0710944	0.162439	<3SD	>1SD	0.647265	OK
TS_7	C1	CAGL0E06028g	ALG5	YPL227C	0.640788	0.650574	0.52089	0.696824	0.627269	0.0750114	0.175933	<3SD	<3SD
TS_3	A6	CAGL0J03828g	MKK2	YPL140C	0.569333	0.745929	0.545631	0.672259	0.633288	0.0930606	0.200299	<2SD	0SD	0.227042	OK
TS_2	E8	CAGL0L11110g	CNA1	YLR433C	0.720698	0.635482	0.550711	0.653567	0.640115	0.0699741	0.169987	<2SD	Pb plankto
TS_9	A11	CAGL0G06864g	MPS3	YJL019W	0.826748		0.456852		0.6418	0.261556	0.369895	<2SD	<3SD
TS_6	A5	CAGL0B00440g	UTP14	YML093W	0.779492		0.519036		0.649264	0.18417	0.260456	<2SD	>1SD	0.00242786	OK
TS_4	C3	CAGL0A01452g	CWH41	YGL027C	0.856731	0.679261	0.674481	0.395945	0.651604	0.190374	0.460785	<2SD	<3SD
TS_1	A10	CAGL0B02211g	CCH1	YGR217W	0.567989	0.725717	0.581111	0.761669	0.659122	0.0988969	0.19368	<2SD	0SD	0.000276911	OK
TS_2	F7	CAGL0M03773g	YNL300W	YNL300W	0.817489	0.491034	0.743878	0.587313	0.659929	0.147954	0.326455	<2SD	0SD	2.88039e-06	OK
1A_BM	D4	CAGL0E01331g	SWI5	YDR146C	0.542798	0.639764	0.720136	0.77905	0.670437	0.102468	0.236252	<2SD	0SD	4.47701e-05	Pb
TS_2	G9	CAGL0M09669g	RIM13	YMR154C	0.608295	0.637171	0.613371	0.913474	0.693078	0.147469	0.305179	<2SD	0SD	0.108598	OK
TS_2	D5	CAGL0L00605g	CNB1	YKL190W	0.836427	0.79633	0.622847	0.519564	0.693792	0.148602	0.316863	<2SD	<1SD	0.000606562	OK
1A_BM	E4	CAGL0F01837g	SPT8	YLR055C	0.688156	0.737169	0.670844	0.715266	0.702859	0.0292814	0.0663243	<2SD	<3SD
2A_BM	E3	CAGL0L06028g	GTS1	YGL181W		0.673665		0.746717	0.710191	0.0516555	0.073052	<2SD	0SD	0.0173463	OK
TS_2	G12	CAGL0M11726g	CCW12	YLR110C	0.732705	0.558636	0.688569	0.865704	0.711404	0.126652	0.307069	<2SD	0SD	0.000634407	OK
TS_1	C4	CAGL0D03850g	RSC3	YDR303C	0.937326	0.526517	0.80446	0.582155	0.712614	0.191992	0.41081	<2SD	Pb plankto
TS_2	H4	CAGL0M13849g	GAS1	YMR307W	0.802402	0.564769	0.82704	0.657679	0.712972	0.123869	0.26227	<2SD	<1SD	0.000606542	OK
TS_1	F6	CAGL0G00242g	YOR1	YGR281W	0.632937	0.695765	0.823912	0.715419	0.717008	0.0794778	0.190975	<2SD	0SD	6.44197e-05	OK
TS_5	D5	CAGL0M05841g	KTR2	YKR061W	0.931914		0.513804		0.722859	0.295648	0.41811	<2SD	<3SD
TS_2	A7	CAGL0I05236g	BCY1	YIL033C	0.796839	0.719655	0.617769	0.79452	0.732196	0.0842887	0.17907	<2SD	0SD	0.000283389	OK
TS_1	E8	CAGL0F06655g	AVO2	YMR068W	0.766203	0.688087	0.898285	0.577343	0.732479	0.13499	0.320941	<2SD	0SD	0.000304233	OK
TS_1	F9	CAGL0G01386g	SLM1	YIL105C	0.640859	0.65315	0.879923	0.764152	0.734521	0.111674	0.239064	<2SD	0SD	2.23571e-05	OK
TS_5	G1	CAGL0D02750g	MYO2	YOR326W	0.707579	0.882662	0.517533	0.832362	0.735034	0.162611	0.365129	<2SD	Pb plankto
TS_4	H12	CAGL0J03366g	GET2	YER083C	0.519149	0.681522	0.793504	0.952933	0.736777	0.182899	0.433784	<2SD	<3SD
TS_2	D6	CAGL0L01727g	DCW1	YKL046C	0.970779	0.653571	0.754832	0.584156	0.740835	0.168556	0.386623	<2SD	<1SD	2.29704e-05	OK
2A_BM	E7	CAGL0L09042g	HAT1	YPL001W	0.692641	0.600087	0.828285	0.896119	0.754283	0.133129	0.296032	<1SD	>1SD
2A_BM	H6	CAGL0M11440g	CHA4	YLR098C	0.847509	0.964211	0.581614	0.642297	0.758908	0.17798	0.382597	<1SD	Pb plankto
2A_BM	F9	CAGL0M01540g	SPT3	YDR392W	0.672085	0.967617	0.551217	0.846972	0.759473	0.184379	0.4164	<1SD	Pb plankto
TS_6	E5	CAGL0A02431g	YPS7	YDR349C	0.444921	0.879556	0.9174	0.796281	0.759539	0.215761	0.472479	<1SD	0SD
2A_BM	E2	CAGL0L05412g	ASF1	YJL115W	0.713442		0.806429		0.759936	0.0657517	0.0929869	<1SD	<3SD
2A_BM	D4	CAGL0L01001g	NOT3	YIL038C	0.669964	0.651343	0.863562	0.863926	0.762199	0.117501	0.212583	<1SD	<1SD
TS_5	H4	CAGL0E04202g	RFX1	YLR176C	0.663007	0.870526	0.670711	0.852312	0.764139	0.112619	0.207519	<1SD	0SD
TS_1	F7	CAGL0G01056g	GAS2	YLR343W	0.801259	0.552562	0.965953	0.769274	0.772262	0.169936	0.413391	<1SD	0SD
TS_6	G2	CAGL0H03993g	CIT1	YNR001C	0.676623	0.968696	0.810834	0.643428	0.774895	0.148089	0.325268	<1SD	>1SD
TS_9	G4	CAGL0K04367g	MUP1	YGR055W	0.774323		0.784347		0.779335	0.0070884	0.0100245	<1SD	>3SD
TS_1	E7	CAGL0F06545g	RIM9	YMR063W	0.665892	0.830212	0.919388	0.70797	0.780866	0.115695	0.253495	<1SD	0SD
1A_BM	D9	CAGL0E03762g	RIM101	YHL027W	0.752463	0.820018	0.818128	0.735891	0.781625	0.043774	0.0841268	<1SD	0SD
TS_1	A5	CAGL0A04081g	SRP40	YKR092C	0.649349	0.748529	0.832201	0.901608	0.782922	0.108841	0.252258	<1SD	0SD
1A_BM	H2	CAGL0H06677g	IMP2'	YIL154C	0.784462	1.01978	0.661519	0.66756	0.783331	0.167484	0.358266	<1SD	0SD
TS_1	E3	CAGL0F03883g	GAS3	YMR215W	0.785372		0.786792		0.786082	0.00100367	0.0014194	<1SD	0SD
TS_6	E12	CAGL0E04510g	YOR022C	YOR022C	0.660508	0.876305	0.816598	0.81191	0.79133	0.0920093	0.215797	<1SD	>1SD
TS_5	H9	CAGL0E06622g	KEG1	YFR042W	0.700687	0.78135	0.83697	0.846583	0.791397	0.0669618	0.145896	<1SD	0SD
TS_6	H7	CAGL0B04147g	DBF20	YPR111W	0.911372		0.680665		0.796018	0.163134	0.230707	<1SD	0SD
TS_6	G4	CAGL0J03058g	ICL1	YER065C	0.66318	0.985336	0.73351	0.803998	0.796506	0.138392	0.322156	<1SD	0SD
2A_BM	D7	CAGL0L02585g	BAS1	YKR099W	0.738159	0.732175	0.789719	0.928214	0.797067	0.0911679	0.19604	<1SD	<3SD
TS_7	E10	CAGL0L07216g	PMT1	YDL095W	0.770768	0.935185	0.775376	0.731873	0.8033	0.0900622	0.203312	<1SD	<1SD
TS_6	G3	CAGL0L06798g	MDH3	YDL078C	0.907326		0.699718		0.803522	0.146801	0.207608	<1SD	0SD
TS_6	E9	CAGL0H03575g	SPO1	YNL012W	0.751166	0.926437	0.777246	0.765176	0.805006	0.0816525	0.175271	<1SD	>2SD
2A_BM	E10	CAGL0L09691g	PUT3	YKL015W	0.81961	1.03522	0.645695	0.723736	0.806066	0.168517	0.389529	<1SD	0SD
TS_9	A3	CAGL0M05929g	PAM17	YKR065C	0.615495	0.659972	0.969498	0.980997	0.80649	0.195764	0.365502	<1SD	0SD
TS_7	D5	CAGL0L01331g	ANP1	YEL036C	0.898909	0.817396	0.724966	0.789814	0.807771	0.07206	0.173943	<1SD	Pb plankto
TS_1	C3	CAGL0D03674g	NEW1	YPL226W	0.911154	0.592124	0.751025	0.986761	0.810266	0.175522	0.394637	<1SD	Pb plankto
1A_BM	H10	CAGL0I00968g	HIR2	YOR038C	1.06575	0.572589	0.808062	0.796224	0.810657	0.201631	0.493163	<1SD	<2SD
1A_BM	H5	CAGL0H07711g	RTF1	YGL244W	0.838227	0.95149	0.704988	0.750467	0.811293	0.108599	0.246501	<1SD	<3SD
TS_9	D12	CAGL0E05940g	FLC1	YPL221W	0.818739		0.804127		0.811433	0.0103324	0.0146122	<1SD	>1SD
TS_3	E4	CAGL0K01507g	GPR1	YDL035C	0.786369		0.837417		0.811893	0.0360962	0.0510477	<1SD	<3SD
TS_4	E2	CAGL0E02915g	SCW11	YGL028C	0.848372	0.909085	0.69491	0.819839	0.818052	0.0901357	0.214174	<1SD	0SD
2A_BM	E4	CAGL0L06842g	THI3	YDL080C	0.89111	0.731894	0.860326	0.79116	0.818623	0.071343	0.159215	<1SD	0SD
2A_BM	G9	CAGL0M06831g	CRZ1	YNL027W	0.735712	0.773132	0.865365	0.923461	0.824418	0.0856063	0.187749	<1SD	Pb plankto
1A_BM	B8	CAGL0C01485g	CTI6	YPL181W	0.869915	1.06761	0.620319	0.740723	0.824641	0.191374	0.447288	<1SD	<1SD
TS_5	H3	CAGL0E03498g	SMF1	YOL122C	0.783127	0.879411	0.815262	0.827588	0.826347	0.040034	0.0962839	<1SD	0SD
TS_2	G2	CAGL0M06831g	CRZ1	YNL027W	0.783989	0.875355	0.795259	0.861675	0.829069	0.0461188	0.091366	<1SD	Pb plankto
TS_2	G8	CAGL0M09207g	STE18	YJR086W	0.809543	0.904689	0.791008	0.815027	0.830067	0.0507985	0.113681	<1SD	0SD
TS_1	E10	CAGL0F07579g	CWP1	YKL096W	0.747253	0.730837	0.852049	0.990175	0.830078	0.119475	0.259338	<1SD	<1SD
2A_BM	E6	CAGL0L08668g	HST2	YPL015C	0.795832	0.675508	0.937563	0.911848	0.830188	0.120144	0.262055	<1SD	0SD
TS_2	H8	CAGL0F08371g	TNA1	YGR260W	0.944385		0.716926		0.830656	0.160838	0.227459	<1SD	>1SD
TS_6	E4	CAGL0J02288g	BAR1	YIL015W	0.765783	0.636551	0.911833	1.00925	0.830853	0.163676	0.372695	<1SD	0SD
1A_BM	H3	CAGL0H06875g	ARG81	YML099C	0.905635	0.793308	0.771451	0.854974	0.831342	0.0608588	0.134184	<1SD	Pb plankto
TS_1	E9	CAGL0F06677g	GPA1	YHR005C	0.874129	0.785442	0.840524	0.829491	0.832396	0.0366098	0.0886872	<1SD	0SD
TS_5	G2	CAGL0D04840g	PSP1	YDR505C	0.868635	0.851961	0.771569	0.851859	0.836006	0.0436758	0.0970665	<1SD	0SD
TS_1	F10	CAGL0G02409g	SRP40	YKR092C	0.678278	0.889039	0.981541	0.806108	0.838741	0.128757	0.303263	<1SD	<3SD
TS_6	F1	CAGL0L08910g	AEP3	YPL005W	0.755218	0.943991	0.793944	0.86593	0.839771	0.0832574	0.188773	<1SD	<2SD
TS_4	G1	CAGL0H00847g	HUT1	YPL244C	0.637189	0.744673	1.00691	0.997438	0.846552	0.185016	0.369718	<1SD	0SD
1A_BM	F11	CAGL0G04389g	GZF3	YJL110C	0.999646	0.860483	0.79099	0.737556	0.847169	0.113428	0.26209	<1SD	<3SD
2A_BM	E11	CAGL0L11704g	SPT2	YER161C	0.881729	0.854725	0.856931	0.799	0.848096	0.0349454	0.0827283	<1SD	0SD
TS_9	G8	CAGL0B02475g	PHO84	YML123C	0.975565	0.980367	0.759484	0.689978	0.851348	0.148946	0.290389	<1SD	>2SD
2A_BM	A7	CAGL0I07755g	HAL9	YOL089C	0.92121	0.866908	0.786218	0.847707	0.855511	0.0557036	0.134992	<1SD	0SD
1A_BM	C9	CAGL0D02486g	RDS1	YCR106W	0.798105	0.931177	0.89362	0.800365	0.855817	0.0671164	0.133073	<1SD	0SD
1A_BM	C11	CAGL0D02926g	BRE2	YLR015W	0.983647	0.684708	0.94158	0.820097	0.857508	0.13446	0.298939	<1SD	<3SD
TS_2	A11	CAGL0I07755g	HAL9	YOL089C	0.770098	0.879743	0.864434	0.920749	0.858756	0.0637077	0.150651	<1SD	0SD
2A_BM	D9	CAGL0L03157g	GZF3	YJL110C	0.842696	0.899289	0.821177	0.886172	0.862333	0.0365764	0.0781121	<1SD	0SD
TS_1	E11	CAGL0F07601g	CWP1	YKL096W	0.828832	0.892721	0.863278	0.865394	0.862556	0.0261778	0.0638893	<1SD	0SD
1A_BM	D12	CAGL0E04884g	ADR1	YDR216W	1.03456	0.89727	0.778556	0.743362	0.863437	0.13172	0.291198	<1SD	0SD
TS_7	H9	CAGL0A03476g	SMF3	YLR034C	0.891268	1.04874	0.659005	0.854929	0.863485	0.160182	0.389731	<1SD	0SD
2A_BM	G7	CAGL0M06325g	RLM1	YPL089C	0.758145	0.790925	0.988117	0.924441	0.865407	0.108928	0.229973	<1SD	>2SD
TS_5	G12	CAGL0E02211g	CBS2	YDR197W	0.785324	0.866336	0.797952	1.01246	0.865518	0.104227	0.227139	<1SD	0SD
TS_4	F10	CAGL0G06072g	ECM14	YHR132C	0.98887	1.11004	0.696789	0.669303	0.86625	0.217542	0.440736	<1SD	0SD
TS_6	E6	CAGL0E06556g	ISC1	YER019W	0.869165	0.797567	1.01419	0.786432	0.866839	0.104853	0.227761	<1SD	<3SD
1A_BM	D7	CAGL0E02805g	HIR1	YBL008W	0.695163	0.812021	1.01717	0.953756	0.869528	0.144456	0.322007	0SD	<1SD
1A_BM	F3	CAGL0F07667g	MSS11	YMR164C	0.662917	0.696703	1.00952	1.11181	0.870239	0.224244	0.448898	0SD	>1SD
2A_BM	B8	CAGL0J10274g	MKS1	YNL076W	1.05703	0.950144	0.692695	0.784692	0.871141	0.163414	0.364335	0SD	<3SD
1A_BM	E7	CAGL0F03069g	CAD1	YDR423C	0.969322	0.931737	0.834263	0.753837	0.87229	0.0973419	0.215485	0SD	0SD
1A_BM	F10	CAGL0G03421g	FLO8	YER109C	0.801639	0.783471	1.01594	0.889038	0.872521	0.106137	0.232466	0SD	>2SD
2A_BM	E9	CAGL0L09383g	SUT1	YGL162W	0.726331	0.814009	0.929818	1.02254	0.873174	0.129849	0.296209	0SD	0SD
2A_BM	D6	CAGL0L02123g	SNF5	YBR289W	0.929612	0.768243	0.78086	1.02465	0.875841	0.123333	0.256405	0SD	Pb plankto
TS_2	D2	CAGL0K12078g	NRG1	YDR043C	1.0529	0.788997	0.88224	0.779803	0.875986	0.126698	0.2731	0SD	0SD
TS_5	B10	CAGL0L03608g	BCH2	YKR027W	0.977205		0.775409		0.876307	0.142691	0.201796	0SD	0SD
1A_BM	H7	CAGL0H08107g	HMS1	YOR032C	0.937137	0.988276	0.797306	0.785221	0.876985	0.101281	0.203055	0SD	>3SD
TS_1	F5	CAGL0F09229g	YER184C	YER184C	0.873822		0.880484		0.877153	0.00471053	0.00666169	0SD	0SD
TS_1	H3	CAGL0H02563g	HOR7	YMR251W-A	0.897937	0.904935	0.868892	0.84108	0.878211	0.0292625	0.0638555	0SD	0SD
1A_BM	H6	CAGL0H07843g	HAP2	YGL237C	0.765796	0.962925	0.944146	0.843078	0.878986	0.0920018	0.197129	0SD	>2SD
TS_5	G3	CAGL0D05104g	KAR3	YPR141C	0.811529	0.911087	0.857898	0.938442	0.879739	0.0564459	0.126913	0SD	0SD
TS_6	F9	CAGL0M03707g	MON2	YNL297C	0.863809		0.906784		0.885297	0.0303879	0.0429749	0SD	0SD
TS_2	F4	CAGL0M03025g	CAT8	YMR280C	0.88288		0.893122		0.888001	0.00724231	0.0102422	0SD	<1SD
TS_2	G5	CAGL0M08184g	STE3	YKL178C	0.783218	0.956601	0.891465	0.927389	0.889668	0.0758016	0.173383	0SD	0SD
TS_1	H2	CAGL0H01683g	URC2	YDR520C	0.835746	0.768961	0.934678	1.02049	0.889969	0.11048	0.251529	0SD	0SD
TS_2	E1	CAGL0L04576g	YRR1	YOR162C	0.868457	1.03758	0.735158	0.934118	0.893829	0.126633	0.302423	0SD	>1SD
2A_BM	D5	CAGL0L01903g	RGT1	YKL038W	0.838821	0.756541	0.94674	1.03611	0.894554	0.122361	0.279573	0SD	0SD
TS_1	E4	CAGL0F04081g	TEC1	YBR083W	0.884808	0.876061	0.853106	0.969378	0.895838	0.0508165	0.116272	0SD	0SD
1A_BM	G7	CAGL0G09042g	AFT2	YPL202C	0.986127	0.850087	0.940692	0.80674	0.895911	0.0820481	0.179388	0SD	>2SD
1A_BM	F7	CAGL0G00704g	SWD1	YAR003W	1.09626	0.926299	0.869838	0.692002	0.8961	0.166656	0.40426	0SD	<3SD
TS_4	B3	CAGL0C00693g	CCC1	YLR220W	0.936404	0.904022	0.873196	0.872143	0.896441	0.0304696	0.0642608	0SD	>1SD
TS_2	D10	CAGL0L03377g	SIP4	YJL089W	0.79085	1.03216	0.910922	0.858518	0.898112	0.101989	0.241309	0SD	0SD
TS_1	E12	CAGL0F07755g	CEP3	YMR168C	0.897193	0.934258	0.934645	0.834199	0.900074	0.0472989	0.100446	0SD	0SD
TS_2	E4	CAGL0L07656g	GLO1	YML004C	0.949986	0.934112	0.782252	0.935489	0.90046	0.0791316	0.167734	0SD	0SD
TS_2	E6	CAGL0L09691g	PUT3	YKL015W	0.862577	1.05576	0.818284	0.866078	0.900674	0.105653	0.237475	0SD	0SD
1A_BM	G8	CAGL0H02145g	STE12	YHR084W	0.860117	0.856724	0.985099	0.902314	0.901064	0.0597385	0.128374	0SD	>2SD
1A_BM	D10	CAGL0E04312g	STP1	YDR463W	1.01186	0.89647	0.956728	0.740398	0.901365	0.117202	0.271465	0SD	<3SD
2A_BM	D8	CAGL0L02739g	SAS5	YOR213C	0.856645	0.922973	0.910668	0.918855	0.902285	0.0308538	0.0663283	0SD	0SD
2A_BM	H8	CAGL0M13189g	MSN4	YKL062W	0.942583	1.1288	0.746008	0.792826	0.902554	0.172565	0.382792	0SD	>2SD
TS_6	C11	CAGL0K08690g	YOL036W	YOL036W	0.927748	0.652118	1.00312	1.03945	0.905608	0.175279	0.387329	0SD	Pb plankto
TS_9	G10	CAGL0G08624g	QDR2	YIL121W	0.924611	0.977093	0.831382	0.891073	0.90604	0.0610768	0.14571	0SD	>1SD
TS_2	C4	CAGL0K01507g	GPR1	YDL035C	0.890628	1.01194	0.958721	0.771343	0.908159	0.103849	0.240602	0SD	<3SD
TS_2	C8	CAGL0K06985g	ERT1	YBR239C	0.958352	0.767485	1.03952	0.868903	0.908565	0.117053	0.272034	0SD	0SD
1A_BM	H9	CAGL0H08866g	HOT1	YMR172W	0.982283	0.873038	0.885281	0.893707	0.908577	0.0498641	0.109244	0SD	>2SD
TS_7	H11	CAGL0M05643g	YFH1	YDL120W	0.844686	0.766745	0.977999	1.04639	0.908954	0.126502	0.279641	0SD	<3SD
2A_BM	H4	CAGL0M09955g	SFP1	YLR403W	0.971337	0.977836	0.752268	0.93826	0.909925	0.106524	0.225568	0SD	<1SD
1A_BM	E9	CAGL0F05621g	HST4	YDR191W	0.935525	0.95133	0.902798	0.851035	0.910172	0.0443029	0.100294	0SD	0SD
1A_BM	E8	CAGL0F04081g	TEC1	YBR083W	0.909169	0.884954	0.949129	0.900122	0.910844	0.0274093	0.064175	0SD	0SD
2A_BM	E5	CAGL0L07436g	PHO2	YDL106C	0.994749	0.773733	0.968437	0.91273	0.912412	0.0985733	0.221016	0SD	Pb plankto
TS_2	F6	CAGL0M03663g	RIM21	YNL294C	0.839368	0.877755	0.851397	1.08187	0.912598	0.113982	0.242503	0SD	0SD
TS_5	H7	CAGL0E06094g	FZF1	YGL254W	0.947554	0.890969	0.879717	0.932211	0.912613	0.0324321	0.0678364	0SD	0SD
TS_5	E9	CAGL0B00572g	DSF2	YBR007C	0.85788	0.904802	0.95113	0.940101	0.913478	0.0420032	0.0932496	0SD	0SD
1A_BM	G11	CAGL0H04367g	WAR1	YML076C	0.937323	0.719575	1.09251	0.90605	0.913866	0.153053	0.37294	0SD	Pb plankto
2A_BM	C9	CAGL0K08668g	MET28	YIR017C	0.887928	0.879291	0.898202	0.994267	0.914922	0.0534584	0.114976	0SD	0SD
2A_BM	F8	CAGL0M01254g	STE12	YHR084W	0.787063	0.801104	1.17378	0.899157	0.915277	0.179406	0.386721	0SD	Pb plankto
TS_2	D11	CAGL0L03674g	GSM1	YJL103C	0.872973	0.961179	0.93791	0.889464	0.915382	0.0411302	0.0882057	0SD	0SD
TS_6	C4	CAGL0I10538g	SYF2	YGR129W	0.883783		0.947456		0.915619	0.0450241	0.0636738	0SD	>1SD
1A_BM	C12	CAGL0D05170g	PHO4	YFR034C	1.07245	0.802424	0.970691	0.823021	0.917146	0.127811	0.270025	0SD	<2SD
TS_6	A3	CAGL0A00583g	PDR8	YLR266C	0.956566		0.881443		0.919005	0.0531205	0.0751237	0SD	<2SD
TS_7	H2	CAGL0D01496g	ISA2	YPR067W	1.11216	0.750336	1.00043	0.819113	0.92051	0.165689	0.361829	0SD	Pb plankto
TS_5	G11	CAGL0E01375g	MUK1	YPL070W	1.03378	0.984624	0.808472	0.857739	0.921154	0.105565	0.225309	0SD	0SD
2A_BM	E8	CAGL0L09339g	HAA1	YPR008W	0.954778	0.944974	0.951408	0.838985	0.922536	0.0558494	0.115793	0SD	0SD
2A_BM	F6	CAGL0M00286g	HIR3	YJR140C	0.987774	0.864303	0.960267	0.878479	0.922706	0.0605851	0.123471	0SD	<2SD
TS_2	A4	CAGL0I04092g	SHE10	YGL228W	1.02004	0.885895	0.857565	0.931095	0.92365	0.0710393	0.162478	0SD	0SD
TS_7	G10	CAGL0L10868g	FSF1	YOR271C	1.03906	0.857494	0.827239	0.971742	0.923884	0.0988343	0.211825	0SD	>1SD
TS_1	B11	CAGL0D01936g	SNF7	YLR025W	1.10854	0.798958	0.978338	0.815782	0.925404	0.146453	0.309579	0SD	0SD
TS_1	C7	CAGL0D06204g	RIM8	YGL045W	0.922752		0.929956		0.926354	0.00509368	0.00720354	0SD	0SD
1A_BM	G5	CAGL0G08844g	ASG1	YIL130W	0.953323	0.881915	0.894459	0.977832	0.926882	0.0460733	0.0959167	0SD	Pb plankto
TS_2	C10	CAGL0K10164g	SED1	YDR077W	1.14945	0.756285	0.909372	0.895114	0.927555	0.163252	0.393164	0SD	0SD
TS_6	C2	CAGL0I03432g	YDL160C-A	YDL160C-A	0.931156		0.925303		0.92823	0.00413876	0.00585309	0SD	Pb plankto
TS_6	E10	CAGL0L03135g	SPO14	YKR031C	1.21589	0.788393	0.841144	0.867638	0.928267	0.194559	0.427499	0SD	Pb plankto
TS_4	A1	CAGL0D05434g	ROX1	YPR065W	0.868422	0.960112	0.904328	0.980974	0.928459	0.0514666	0.112551	0SD	>1SD
TS_5	H1	CAGL0E03069g	HXT8	YJL214W	0.938654	0.917444	0.899644	0.960101	0.928961	0.0261775	0.0604567	0SD	0SD
1A_BM	G9	CAGL0H02959g	CUP9	YPL177C	1.06209	0.818419	1.04747	0.789322	0.929325	0.145471	0.272771	0SD	>1SD
1A_BM	H11	CAGL0I02552g	STB5	YHR178W	1.07226	0.635126	1.04238	0.969793	0.929892	0.201166	0.437137	0SD	>1SD
TS_4	B11	CAGL0F09097g	SKN7	YHR206W	1.02885	0.736596	1.07616	0.879038	0.930163	0.153989	0.339568	0SD	Pb plankto
1A_BM	D11	CAGL0E04488g	AHC1	YOR023C	0.95816	0.859603	0.928455	0.975721	0.930485	0.0511223	0.116117	0SD	0SD
1A_BM	G6	CAGL0G08866g	FKH1	YIL131C	0.935587	1.00403	0.905857	0.881283	0.931689	0.0530927	0.122747	0SD	>1SD
TS_1	A7	CAGL0B00858g	STE50	YCL032W	0.92691	1.02407	0.757961	1.02008	0.932254	0.124565	0.266109	0SD	0SD
TS_1	D7	CAGL0E06666g	MUC1	YIR019C	0.838723	0.883066	1.12157	0.88764	0.932749	0.127798	0.282845	0SD	0SD
TS_3	B10	CAGL0G02497g	MLP1	YKR095W	0.801456	1.07718	0.840912	1.01699	0.934134	0.133693	0.275725	0SD	0SD
2A_BM	H5	CAGL0M10087g	YAP3	YHL009C	1.00344	1.05743	0.810832	0.865053	0.934187	0.11544	0.246593	0SD	>3SD
TS_1	A12	CAGL0B03421g	HAP1	YLR256W	0.996541	0.903498	0.934447	0.908902	0.935847	0.0426545	0.0930429	0SD	0SD
1A_BM	D6	CAGL0E02475g	SIN3	YOL004W	0.921076	0.736209	1.07594	1.02111	0.938583	0.149375	0.339727	0SD	<3SD
TS_7	G9	CAGL0M07942g	FRE8	YLR047C	0.897029	0.821402	0.987526	1.04841	0.938592	0.0998596	0.22701	0SD	0SD
TS_9	G6	CAGL0K08272g	YSR3	YKR053C	0.94071		0.938653		0.939682	0.00145432	0.00205672	0SD	>1SD
TS_1	H9	CAGL0H06875g	ARG81	YML099C	0.824586	1.00494	1.16694	0.771809	0.94207	0.180104	0.395136	0SD	Pb plankto
TS_1	D2	CAGL0E03762g	RIM101	YHL027W	1.11488	0.820019	0.924903	0.909988	0.942448	0.123941	0.294864	0SD	0SD
TS_1	C2	CAGL0D02904g	PPR1	YLR014C	1.11992	0.781221	1.01235	0.857427	0.942729	0.15232	0.338695	0SD	0SD
TS_5	A10	CAGL0K04455g	SPR3	YGR059W	0.718977	1.11089	1.01581	0.933417	0.944774	0.167088	0.391917	0SD	0SD
TS_1	D10	CAGL0F01463g	TIR1	YER011W	0.902358	1.05452	0.973747	0.853547	0.946042	0.087555	0.200968	0SD	0SD
1A_BM	E5	CAGL0F03025g	ARO80	YDR421W	0.906689	1.01427	0.802931	1.06602	0.947476	0.117004	0.263086	0SD	Pb plankto
TS_1	C1	CAGL0D02882g	SSK1	YLR006C	1.11269	0.848219	0.817637	1.01433	0.948221	0.139613	0.295057	0SD	0SD
TS_5	H2	CAGL0E03135g	MDL2	YPL270W	1.16371	0.911195	0.951186	0.774271	0.95009	0.161306	0.389438	0SD	0SD
TS_9	E11	CAGL0I04664g	FIG1	YBR040W	1.02623	0.969929	1.04477	0.76287	0.950951	0.129363	0.281901	0SD	0SD
TS_5	F11	CAGL0D00396g	PSF2	YJL072C	0.86784	0.777991	1.02343	1.15492	0.956047	0.166911	0.376934	0SD	0SD
TS_7	E11	CAGL0J08734g	PMT2	YAL023C	0.898378	0.987917	0.925923	1.01637	0.957148	0.0544164	0.117997	0SD	Pb plankto
TS_7	A2	CAGL0G02607g	PRK1	YIL095W	0.86336	1.1381	0.88316	0.94885	0.958367	0.125269	0.27474	0SD	0SD
2A_BM	F5	CAGL0L13090g	NDT80	YHR124W	0.994545	0.854244	1.10397	0.884604	0.959342	0.113708	0.249729	0SD	>1SD
TS_6	C6	CAGL0J06490g	CUE1	YMR264W	1.14909	0.82592	0.888957	0.973518	0.959371	0.140192	0.323172	0SD	<1SD
TS_3	H12	CAGL0K04169g	KSS1	YGR040W	0.939064		0.984535		0.961799	0.0321527	0.0454708	0SD	>1SD
TS_9	E9	CAGL0K04279g	SCM4	YGR049W	1.04262	0.869897	0.98351	0.959146	0.963793	0.0717411	0.172722	0SD	>1SD
TS_2	A9	CAGL0I06138g	FAR1	YJL157C	0.942666	0.87898	1.05013	0.985622	0.964351	0.0720412	0.171155	0SD	0SD
TS_1	F3	CAGL0F08833g	MSB2	YGR014W	1.02586		0.904229		0.965047	0.0860087	0.121635	0SD	>1SD
2A_BM	D11	CAGL0L03916g	AZF1	YOR113W	1.01584	1.0143	0.84648	0.985594	0.965554	0.0805916	0.169355	0SD	<1SD
TS_1	A6	CAGL0A04455g	SEF1	YBL066C	1.25778	0.839553	0.920775	0.850702	0.967202	0.197025	0.418225	0SD	0SD
1A_BM	A8	CAGL0A04235g	SAS3	YBL052C	1.1233	1.10831	0.764593	0.873203	0.967352	0.177167	0.358707	0SD	0SD
TS_4	G5	CAGL0H06545g	ECM37	YIL146C	0.770189	0.824167	1.09684	1.18339	0.968647	0.202328	0.413206	0SD	0SD
TS_1	H5	CAGL0H03861g	HRB1	YNL004W	0.914043	1.03781	1.00875	0.916352	0.96924	0.0635273	0.123767	0SD	0SD
TS_2	D1	CAGL0K11902g	LYS14	YDR034C	1.20668	0.850643	0.902995	0.921158	0.97037	0.160353	0.35604	0SD	0SD
TS_2	F2	CAGL0M02387g	PXA1	YPL147W	1.09922	0.739529	0.940828	1.10289	0.970615	0.171583	0.36336	0SD	0SD
1A_BM	A12	CAGL0B01188g	TOS4	YLR183C	1.2872	0.936055	0.846943	0.813439	0.970909	0.217116	0.47376	0SD	0SD
TS_1	F4	CAGL0F09053g	MNL1	YHR204W	0.831676	0.829988	1.14191	1.08868	0.973063	0.165667	0.311924	0SD	0SD
TS_2	G1	CAGL0M05907g	OAF3	YKR064W	0.930243	0.972868	1.0317	0.959872	0.973671	0.0426009	0.101458	0SD	>1SD
TS_5	H8	CAGL0E06578g	MRP13	YGR084C	0.912639	0.985852	0.949404	1.06734	0.978808	0.0661561	0.154698	0SD	0SD
2A_BM	D10	CAGL0L03377g	SIP4	YJL089W	1.03492	1.07438	0.924301	0.884849	0.979613	0.0895902	0.189528	0SD	0SD
TS_5	D1	CAGL0M01628g	SAC7	YDR389W	0.971865		0.98781		0.979838	0.0112747	0.0159449	0SD	<2SD
TS_7	H4	CAGL0E06006g	MMT2	YPL224C	1.08229	0.974782	0.948821	0.917141	0.98076	0.0716763	0.165153	0SD	0SD
TS_1	H11	CAGL0H08624g	MCM16	YPR046W	1.05729	0.883605	0.985141	0.99809	0.981031	0.0721452	0.173683	0SD	<1SD
TS_6	F2	CAGL0G03267g	AST1	YBL069W	1.22862	0.9627	0.825392	0.909146	0.981464	0.174188	0.403224	0SD	0SD
TS_1	B10	CAGL0C03872g	TIR3	YIL011W	1.11878	1.01868	0.91701	0.873516	0.981996	0.109615	0.245262	0SD	0SD
TS_1	B8	CAGL0C02343g	ARB1	YER036C	0.854741	1.00157	1.00945	1.06576	0.982879	0.0900806	0.211017	0SD	Pb plankto
2A_BM	G11	CAGL0M06919g	FAP1	YNL023C	1.09031	0.906542	0.927855	1.0073	0.983003	0.0836524	0.18377	0SD	>1SD
TS_5	G5	CAGL0D05654g	SDS23	YGL056C	0.906693	0.852142	1.16693	1.01161	0.984342	0.138548	0.314785	0SD	0SD
TS_1	C8	CAGL0D06512g	CDC25	YLR310C	1.01746		0.951389		0.984425	0.0467198	0.0660717	0SD	0SD
TS_9	F2	CAGL0L08294g	AXL2	YIL140W	1.0814		0.888158		0.984777	0.13664	0.193238	0SD	>2SD
TS_1	A8	CAGL0B00968g	FUS1	YCL027W	0.940784	1.01397	0.943793	1.04724	0.986445	0.0527798	0.106453	0SD	0SD
2A_BM	G5	CAGL0M04015g	DAL82	YNL314W	0.840942	0.870435	1.14821	1.09261	0.988051	0.154984	0.307273	0SD	>2SD
TS_3	B8	CAGL0D02794g	WSC4	YHL028W	0.844479	1.12847	0.942954	1.04029	0.989049	0.122597	0.283993	0SD	0SD
TS_1	G8	CAGL0G09449g	CRH1	YGR189C	0.935532	0.938075	1.06612	1.01733	0.989265	0.0637757	0.130587	0SD	0SD
2A_BM	G8	CAGL0M06699g	SDS3	YIL084C	0.909627	1.08792	1.0296	0.933359	0.990127	0.0833167	0.178296	0SD	<3SD
TS_1	E2	CAGL0F03025g	ARO80	YDR421W	0.967087		1.01496		0.991025	0.0338533	0.0478759	0SD	Pb plankto
TS_2	E12	CAGL0M01760g	PDR5	YOR153W	0.978376	0.954912	0.917191	1.11444	0.991229	0.0859184	0.197246	0SD	0SD
TS_2	C2	CAGL0K00363g	STE6	YKL209C	0.89588	1.04226	1.0069	1.02101	0.991512	0.0653894	0.146376	0SD	0SD
TS_9	D4	CAGL0G08019g	YDR090C	YDR090C	0.893066	0.874172	1.10501	1.1023	0.993636	0.127276	0.230835	0SD	>1SD
TS_2	E5	CAGL0L07744g	ADP1	YCR011C	0.969939	0.963312	1.00626	1.0363	0.993954	0.0339635	0.0729908	0SD	0SD
TS_1	A4	CAGL0A03586g	YLR040C	YLR040C	1.09812	1.00346	0.908192	0.96943	0.9948	0.0793614	0.189929	0SD	Pb plankto
1A_BM	C5	CAGL0D00682g	SFP1	YLR403W	0.833824	0.901428	1.06567	1.17885	0.994943	0.156554	0.345023	0SD	<1SD
TS_3	A11	CAGL0L06336g	STE5	YDR103W	0.88176	1.12087	0.932613	1.04474	0.994995	0.108063	0.239112	0SD	0SD
TS_5	G10	CAGL0E00165g	CYC2	YOR037W	0.963156		1.03056		0.996857	0.0476605	0.0674021	0SD	0SD
TS_2	H11	CAGL0L06138g	TPN1	YGL186C	0.786684	1.06265	1.22098	0.917794	0.997025	0.187066	0.434292	0SD	<2SD
TS_9	C8	CAGL0L01551g	SUR7	YML052W	0.981776		1.01346		0.997616	0.0224019	0.0316811	0SD	0SD
1A_BM	G4	CAGL0G08646g	POG1	YIL122W	0.920332	1.02658	0.973849	1.07044	0.997801	0.0650136	0.150111	0SD	>1SD
TS_2	H2	CAGL0M12298g	OAF1	YAL051W	0.9433	1.13509	0.9952	0.927638	1.00031	0.0943826	0.207456	0SD	Pb plankto
TS_4	F5	CAGL0G00814g	CHS5	YLR330W		0.988542		1.01477	1.00165	0.0185425	0.0262231	0SD	0SD
TS_1	F12	CAGL0G03597g	SHO1	YER118C	0.88844		1.11896		1.0037	0.163001	0.230519	0SD	<1SD
TS_6	D3	CAGL0L06226g	HEK2	YBL032W	0.944411		1.06407		1.00424	0.0846088	0.119655	0SD	0SD
TS_1	D9	CAGL0F01419g	AUS1	YOR011W	1.0193	1.0286	0.980716	0.993072	1.00542	0.022308	0.0478892	0SD	0SD
TS_9	D9	CAGL0F03641g	THI74	YDR438W	0.934091		1.07852		1.00631	0.102127	0.14443	0SD	>1SD
TS_3	A3	CAGL0G04125g	SAG1	YJR004C	0.985972	0.903533	1.20743	0.930754	1.00692	0.138001	0.303895	0SD	0SD
TS_7	E9	CAGL0C04048g	MNT3	YIL014W	0.906101	0.759349	1.16029	1.21161	1.00934	0.213582	0.452261	0SD	0SD
1A_BM	C3	CAGL0C05357g	SIR2	YDL042C	0.817391	1.02538	1.25278	0.942184	1.00943	0.183369	0.435385	0SD	<3SD
TS_4	A3	CAGL0K03003g	MOT3	YMR070W	0.957827	1.03545	0.992282	1.05736	1.01073	0.0444397	0.099536	0SD	>1SD
TS_2	C3	CAGL0K01331g	SIT4	YDL047W	0.982449	0.878351	1.06916	1.11397	1.01098	0.103917	0.235622	0SD	0SD
2A_BM	B10	CAGL0K03003g	MOT3	YMR070W	1.13885	1.11706	0.919102	0.869022	1.01101	0.136865	0.269827	0SD	0SD
TS_7	G6	CAGL0M07942g	FRE8	YLR047C	0.899318	0.897283	1.04887	1.20312	1.01215	0.145767	0.305839	0SD	0SD
1A_BM	C8	CAGL0D01430g	HOS1	YPR068C	0.794198	0.810342	1.26585	1.1823	1.01317	0.245995	0.471653	0SD	0SD
1A_BM	E6	CAGL0F03047g	SIP1	YDR422C	1.09422	1.17981	0.854443	0.925822	1.01357	0.149621	0.325362	0SD	0SD
2A_BM	G3	CAGL0M03025g	CAT8	YMR280C	0.878588	0.878009	1.21139	1.08796	1.01399	0.164584	0.333386	0SD	0SD
2A_BM	D3	CAGL0K12540g	HAC1	YFL031W	0.954982	0.78832	1.10297	1.21144	1.01443	0.183766	0.423116	0SD	<1SD
2A_BM	H7	CAGL0M12298g	OAF1	YAL051W	0.971664	1.06688	1.01565	1.01313	1.01683	0.038989	0.0952198	0SD	Pb plankto
1A_BM	H4	CAGL0H07557g	FZF1	YGL254W	1.08981	1.14598	0.899837	0.932846	1.01712	0.119368	0.246141	0SD	>1SD
TS_1	D3	CAGL0E03982g	YBT1	YLL048C	1.14653	0.996722	0.968001	0.962291	1.01838	0.0867456	0.184235	0SD	>1SD
TS_9	E8	CAGL0I00726g	YMR148W	YMR148W	1.11061		0.926692		1.01865	0.130051	0.18392	0SD	>2SD
TS_2	F3	CAGL0M02651g	RDS2	YPL133C	1.15995	0.857265	0.939819	1.11759	1.01866	0.143776	0.302685	0SD	Pb plankto
TS_2	A3	CAGL0I03498g	STE7	YDL159W	1.19191	0.867978	0.948351	1.06777	1.019	0.141511	0.323932	0SD	0SD
TS_2	C12	CAGL0K10868g	CTA1	YDR256C	1.09403	1.09234	0.887429	1.00237	1.01904	0.0976323	0.206606	0SD	0SD
TS_5	B3	CAGL0K08228g	YKR051W	YKR051W	0.889311	1.35162	0.935489	0.906683	1.02078	0.221385	0.462312	0SD	0SD
TS_2	G10	CAGL0M10791g	SSK2	YNR031C	1.04391	1.00229	1.07299	0.965605	1.0212	0.0470691	0.107389	0SD	0SD
TS_6	A9	CAGL0C00583g	SHE3	YBR130C	1.113	1.12079	0.954915	0.900503	1.0223	0.111509	0.220288	0SD	>1SD
2A_BM	F7	CAGL0M00594g	RSF2	YJR127C		0.925378		1.11961	1.02249	0.137343	0.194232	0SD	>1SD
1A_BM	G3	CAGL0G08107g	GIS1	YDR096W	0.907867	1.15254	0.944491	1.09419	1.02477	0.117267	0.244668	0SD	>1SD
TS_6	B6	CAGL0F00209g	SEO1	YAL067C	1.13137	1.07416	1.01163	0.889045	1.02655	0.103897	0.242324	0SD	0SD
TS_7	A6	CAGL0F00913g	PSK2	YOL045W	1.12058	1.20682	0.938525	0.843154	1.02727	0.16605	0.363661	0SD	<1SD
TS_9	B9	CAGL0L01463g	ERM6	YJR054W	1.0901	1.04358	0.950658	1.02744	1.02794	0.0579684	0.139441	0SD	0SD
TS_2	G11	CAGL0M11440g	CHA4	YLR098C	1.06845	1.26212	0.840119	0.947203	1.02947	0.180985	0.422	0SD	Pb plankto
TS_6	C9	CAGL0K03245g	YKL105C	YKL105C	1.12035		0.939664		1.03001	0.127764	0.180685	0SD	>1SD
2A_BM	C7	CAGL0K07634g	GAT1	YFL021W	0.785717	0.869753	1.26142	1.2106	1.03187	0.239104	0.475702	0SD	0SD
1A_BM	F8	CAGL0G02739g	XBP1	YIL101C	1.15356	0.995953	1.05753	0.924888	1.03298	0.0969494	0.228673	0SD	>1SD
TS_9	A8	CAGL0D02442g	LEM3	YNL323W	1.03861		1.03016		1.03439	0.00597742	0.00845335	0SD	<3SD
1A_BM	F6	CAGL0F09097g	SKN7	YHR206W	1.29601	0.865681	0.876745	1.10138	1.03495	0.205137	0.430324	0SD	Pb plankto
TS_6	A7	CAGL0B03355g	DPB3	YBR278W	1.11122	1.00236	1.02956	0.998141	1.03532	0.0524824	0.113082	0SD	0SD
TS_7	G5	CAGL0C03333g	FRE6	YLL051C	0.943325	0.94416	0.996241	1.26139	1.03628	0.152102	0.318066	0SD	0SD
TS_5	A8	CAGL0K02277g	DSE1	YER124C	0.712199	1.13098	1.18424	1.12518	1.03815	0.218918	0.472038	0SD	0SD
2A_BM	G4	CAGL0M03927g	STB1	YNL309W	0.831275	0.858011	1.27829	1.18669	1.03857	0.227286	0.447012	0SD	>1SD
TS_2	D3	CAGL0K12430g	STE2	YFL026W	1.09375	1.09518	1.05627	0.915052	1.04007	0.0852671	0.18013	0SD	0SD
TS_1	D1	CAGL0E03476g	CDC25	YLR310C	1.17278	0.996452	0.966118	1.02753	1.04072	0.0915427	0.206666	0SD	<2SD
TS_5	E3	CAGL0A02299g	CTF4	YPR135W	0.83194	0.821188	1.31153	1.20156	1.04155	0.252315	0.490345	0SD	0SD
TS_7	G4	CAGL0K12738g	FET5	YFL041W	1.0369	1.03934	0.962363	1.13182	1.0426	0.0693805	0.169455	0SD	0SD
TS_7	B4	CAGL0L07326g	DUN1	YDL101C	0.943693	0.813506	1.17191	1.24737	1.04412	0.200756	0.433865	0SD	Pb plankto
TS_5	F1	CAGL0C00803g	MET31	YPL038W	1.20601	1.12606	0.798063	1.04849	1.04466	0.176526	0.407945	0SD	0SD
1A_BM	E3	CAGL0F01265g	YAP5	YIR018W	1.00603	1.23403	0.924113	1.02298	1.04679	0.132079	0.309912	0SD	>3SD
TS_5	F7	CAGL0C02915g	DAL80	YKR034W	0.957475	0.945616	1.08433	1.20186	1.04732	0.120648	0.256243	0SD	0SD
TS_3	A9	CAGL0G00858g	MID2	YLR332W	0.992273	1.02105	1.15842	1.01969	1.04786	0.0748935	0.166152	0SD	0SD
TS_7	F9	CAGL0G09515g	EXG1	YLR300W	1.10877		0.991926		1.05035	0.0826234	0.116847	0SD	>2SD
TS_5	C11	CAGL0M00748g	ECM7	YLR443W	0.991747	1.09172	1.01219	1.11709	1.05318	0.0606167	0.125339	0SD	0SD
TS_7	B8	CAGL0K10604g	CMK2	YOL016C	0.841335	0.837387	1.25248	1.2833	1.05362	0.247735	0.44591	0SD	0SD
TS_3	E5	CAGL0I08195g	GPA2	YER020W	0.966719	1.12643	1.10304	1.02546	1.05541	0.0732018	0.159709	0SD	<3SD
2A_BM	B6	CAGL0J07942g	SIP3	YNL257C	1.18828	1.03851	0.9121	1.10452	1.06085	0.116578	0.276182	0SD	Pb plankto
TS_4	B2	CAGL0M08250g	ZRT3	YKL175W	1.18214	1.04029	1.15633	0.865954	1.06118	0.144033	0.31619	0SD	0SD
TS_9	F9	CAGL0L11308g	ERV41	YML067C	1.04523		1.07903		1.06213	0.0238997	0.0337993	0SD	>3SD
TS_9	G7	CAGL0I01012g	PEP12	YOR036W	1.22045	1.15609	1.02042	0.86621	1.06579	0.157017	0.354237	0SD	<1SD
TS_5	F8	CAGL0C03311g	COG1	YGL223C	0.880261	0.926437	1.22459	1.23377	1.06626	0.189098	0.353508	0SD	0SD
TS_5	E11	CAGL0B03223g	YOR287C	YOR287C	0.962891	0.967468	1.10971	1.22608	1.06654	0.126326	0.26319	0SD	0SD
TS_4	G9	CAGL0I00484g	EXG1	YLR300W	1.28188		0.813093	1.10749	1.06749	0.236939	0.468784	0SD	>1SD
TS_6	A11	CAGL0C02739g	FUN14	YAL008W	1.15852		0.977235		1.06788	0.128189	0.181286	0SD	0SD
TS_5	B6	CAGL0K11231g	MNN10	YDR245W	0.90461	1.2299	1.29884	0.840905	1.06857	0.229324	0.457938	0SD	<3SD
2A_BM	F10	CAGL0M01716g	TEC1	YBR083W	1.06115	1.27776	1.02408	0.914837	1.06946	0.152124	0.362922	0SD	0SD
TS_6	C1	CAGL0H06347g	DEP1	YAL013W	1.19828		0.946009		1.07215	0.178385	0.252274	0SD	<3SD
TS_5	F10	CAGL0C05401g	NMA1	YLR328W	0.823836	0.969274	1.19643	1.30196	1.07287	0.216409	0.478124	0SD	0SD
TS_7	E3	CAGL0G07887g	VOA1	YGR106C	0.911617		1.24		1.07581	0.232204	0.328387	0SD	0SD
1A_BM	B10	CAGL0C02277g	GLN3	YER040W	1.12429	1.05465	1.18118	0.949249	1.07734	0.0998492	0.231932	0SD	Pb plankto
TS_2	D4	CAGL0K12562g	RIM15	YFL033C	1.26535	1.23225	0.942594	0.869734	1.07748	0.200502	0.395619	0SD	Pb plankto
TS_1	F11	CAGL0G02827g	SLM1	YIL105C	1.07002	1.10333	1.23418	0.904763	1.07807	0.135535	0.329421	0SD	0SD
1A_BM	B6	CAGL0B04895g	RFX1	YLR176C	0.842568	1.18828	1.09705	1.18567	1.07839	0.162835	0.345715	0SD	0SD
TS_5	F6	CAGL0C02365g	MET4	YNL103W	1.14318	0.883673	1.18763	1.09955	1.07851	0.134777	0.303959	0SD	0SD
TS_2	B1	CAGL0I08195g	GPA2	YER020W	1.15121	1.14536	1.08597	0.938131	1.08017	0.099171	0.213077	0SD	<3SD
1A_BM	C10	CAGL0D02904g	PPR1	YLR014C	1.00312	0.997073	1.23107	1.09074	1.0805	0.109122	0.233992	0SD	0SD
1A_BM	G10	CAGL0H03575g	SPO1	YNL012W	1.21905	1.04146	1.09927	0.962931	1.08068	0.107849	0.256116	0SD	>2SD
TS_5	C3	CAGL0L07854g	CWH43	YCR017C	1.33226	1.20758	0.910498	0.873166	1.08088	0.224664	0.459097	0SD	<1SD
1A_BM	B5	CAGL0B03575g	HAT2	YEL056W	0.934967	1.18924	1.05048	1.15497	1.08241	0.114656	0.254275	0SD	>1SD
2A_BM	B5	CAGL0J07898g	GIS2	YNL255C	1.02995	1.15361	1.00488	1.14166	1.08252	0.0760319	0.148726	0SD	Pb plankto
TS_2	C1	CAGL0J11770g	PLB1	YMR008C	0.925116	1.14954	1.12768	1.12996	1.08307	0.10576	0.22442	0SD	0SD
TS_4	B5	CAGL0M05533g	DUR1,2	YBR208C	1.21774	0.880688	1.28792	0.952561	1.08473	0.198395	0.407235	0SD	>1SD
TS_9	H2	CAGL0K00649g	SOP4	YJL192C	1.12275	1.2062	0.974453	1.03658	1.085	0.101125	0.231746	0SD	>1SD
2A_BM	B1	CAGL0J05060g	ZAP1	YJL056C	1.09627	1.29748	1.00462	0.973736	1.09302	0.145896	0.323741	0SD	>2SD
TS_2	E7	CAGL0L10956g	RIM20	YOR275C	0.959262	1.07585	1.17759	1.1625	1.0938	0.100272	0.218331	0SD	0SD
2A_BM	C12	CAGL0K09900g	HAP5	YOR358W	0.931896	1.19697	1.11257	1.13813	1.09489	0.114264	0.265071	0SD	0SD
TS_6	H8	CAGL0F03245g	IRE1	YHR079C	1.27451		0.91708		1.09579	0.252739	0.357427	0SD	>1SD
TS_1	G9	CAGL0G09757g	YLR278C	YLR278C	1.03589	1.16736	0.987552	1.19281	1.0959	0.0997334	0.205262	0SD	<1SD
TS_1	D4	CAGL0E04620g	ECM33	YBR078W	1.22679		0.965128		1.09596	0.185024	0.261664	0SD	<1SD
2A_BM	C10	CAGL0K08756g	YAP7	YOL028C	0.995687	1.03021	1.15012	1.20786	1.09597	0.0997204	0.212173	0SD	0SD
TS_6	E2	CAGL0G02717g	SGA1	YIL099W	1.21078		0.982244		1.09651	0.161599	0.228536	0SD	>1SD
2A_BM	D2	CAGL0K11902g	LYS14	YDR034C	0.945519	0.960684	1.28264	1.20463	1.09837	0.170846	0.337118	0SD	0SD
TS_9	C5	CAGL0C02717g	SPO7	YAL009W	1.03273	0.849752	1.2529	1.25926	1.09866	0.196541	0.409504	0SD	>2SD
TS_4	A6	CAGL0E01859g	YPS1	YLR120C	1.11147	1.03189	1.22382	1.0287	1.09897	0.0916178	0.195121	0SD	0SD
TS_7	A7	CAGL0D02244g	MEK1	YOR351C	1.09394	1.37067	1.054	0.881216	1.09996	0.202717	0.489457	0SD	<1SD
TS_5	C8	CAGL0L11572g	SBE22	YHR103W	1.15095		1.05048		1.10072	0.0710379	0.100463	0SD	>1SD
2A_BM	G2	CAGL0M02739g	TAF14	YPL129W	1.01196	1.11233	1.23993	1.05709	1.10533	0.0986789	0.227973	0SD	<3SD
TS_9	H5	CAGL0M13321g	SVP26	YHR181W	1.0949	1.11815	1.06143	1.15648	1.10774	0.0399711	0.0950459	>1SD	0SD
TS_5	F3	CAGL0C01111g	PPZ1	YML016C	1.15837	1.00351	1.26884	1.00146	1.10805	0.129969	0.267384	>1SD	0SD
1A_BM	D5	CAGL0E02079g	MSN1	YOL116W	0.840087	0.952689	1.30379	1.33601	1.10815	0.249148	0.495926	>1SD	Pb plankto
1A_BM	B9	CAGL0C01551g	CUP9	YPL177C	1.13707	1.0265	1.22199	1.05246	1.1095	0.0886111	0.195485	>1SD	0SD
TS_1	G1	CAGL0G04125g	SAG1	YJR004C	0.97282		1.24918		1.111	0.195414	0.276357	>1SD	0SD
TS_1	G6	CAGL0G08844g	ASG1	YIL130W	1.30303	1.36284	0.9181	0.883294	1.11682	0.251146	0.479542	>1SD	Pb plankto
TS_1	C9	CAGL0E00385g	MDL1	YLR188W	1.173	1.08361	0.937717	1.27305	1.11685	0.142298	0.335336	>1SD	0SD
TS_3	B7	CAGL0K04037g	GSC2	YGR032W	1.08983	1.15709	1.06384	1.16341	1.11855	0.0493825	0.0995699	>1SD	0SD
2A_BM	C11	CAGL0K09372g	MIG2	YGL209W	1.02942	0.980241	1.19198	1.27504	1.11917	0.137784	0.294798	>1SD	0SD
1A_BM	F9	CAGL0G03179g	GCA1	YPR115W	1.25427	1.13022	1.09745	1.0028	1.12119	0.103877	0.251469	>1SD	<1SD
TS_2	B2	CAGL0I08503g	MET16	YPR167C	1.08613	1.1097	1.10066	1.19064	1.12178	0.0469206	0.104512	>1SD	0SD
2A_BM	B2	CAGL0J06182g	SKO1	YNL167C	1.28429	1.27075	1.047	0.894257	1.12407	0.187918	0.390037	>1SD	0SD
TS_9	B5	CAGL0J08371g	PRM1	YNL279W	1.2969	1.08849	0.935578	1.18083	1.12545	0.152621	0.361321	>1SD	0SD
TS_6	C7	CAGL0J10582g	PSP2	YML017W	1.10005	1.04848	1.18095	1.17286	1.12559	0.0629758	0.132471	>1SD	>1SD
2A_BM	F2	CAGL0L12562g	MET31	YPL038W	1.12294	1.08247	1.21378	1.08688	1.12652	0.0609347	0.131309	>1SD	>1SD
TS_2	F1	CAGL0M01826g	ECM33	YBR078W	1.20511	0.96069	1.23157	1.11606	1.12836	0.122212	0.270879	>1SD	0SD
TS_5	D7	CAGL0M08492g	PIR1	YKL164C	1.31783	1.35249	0.947623	0.906884	1.13121	0.236516	0.445606	>1SD	0SD
1A_BM	A9	CAGL0A04455g	SEF1	YBL066C	1.12714	0.941173	1.266	1.19196	1.13157	0.139031	0.324826	>1SD	0SD
2A_BM	E1	CAGL0L04576g	YRR1	YOR162C	1.0492	1.08888	1.12498	1.27009	1.13329	0.0963093	0.220891	>1SD	>2SD
TS_5	E12	CAGL0C00781g	RDH54	YBR073W	1.03681		1.2311		1.13396	0.137386	0.194293	>1SD	0SD
TS_6	A2	CAGL0K02145g	COM2	YER130C	1.16572		1.10459		1.13515	0.0432251	0.0611295	>1SD	0SD
TS_6	G1	CAGL0K12254g	VID24	YBR105C	0.888408	1.16903	1.11663	1.36747	1.13538	0.196931	0.479062	>1SD	0SD
TS_5	F2	CAGL0C00869g	YKL161C	YKL161C	1.08051	1.05047	0.962596	1.46181	1.13885	0.221045	0.499213	>1SD	>2SD
1A_BM	E1	CAGL0E05566g	TYE7	YOR344C	0.965787	1.21739	1.0153	1.36078	1.13981	0.183152	0.394992	>1SD	>1SD
TS_1	D11	CAGL0F02079g	SMC1	YFL008W	1.07987		1.20023		1.14005	0.0851097	0.120363	>1SD	0SD
TS_9	B6	CAGL0G04433g	PRM10	YJL108C	1.2296		1.05613		1.14287	0.122658	0.173465	>1SD	Pb plankto
TS_5	A6	CAGL0J08910g	CRR1	YLR213C	0.973986	1.20592	1.28426	1.10759	1.14294	0.133832	0.310273	>1SD	0SD
TS_2	A5	CAGL0I04862g	SNQ2	YDR011W	1.14924	1.12919	1.24261	1.0582	1.14481	0.076	0.184401	>1SD	0SD
TS_2	F9	CAGL0M04191g	YPS1	YLR120C	1.03761	1.13736	1.18462	1.243	1.15065	0.0868676	0.205394	>1SD	<1SD
TS_7	A11	CAGL0I05192g	CKA1	YIL035C	1.06615	1.08498	1.25141	1.20657	1.15228	0.090776	0.185255	>1SD	<3SD
TS_9	B1	CAGL0I10494g	NCE102	YPR149W	1.06897	1.04851	1.18677	1.31512	1.15484	0.123001	0.266609	>1SD	0SD
TS_9	A7	CAGL0I07491g	IZH1	YDR492W	1.04405	1.12828	1.29101	1.15685	1.15505	0.102513	0.246963	>1SD	0SD
TS_1	F2	CAGL0F07909g	HAL9	YOL089C	1.03243	1.05303	1.15667	1.38221	1.15609	0.160253	0.349781	>1SD	>1SD
TS_7	D9	CAGL0H09130g	MNN4	YKL201C	1.01226		1.30075		1.15651	0.203996	0.288493	>1SD	<3SD
1A_BM	A10	CAGL0A04785g	RTG2	YGL252C	1.09558	1.16357	1.11013	1.25993	1.1573	0.0743999	0.164347	>1SD	Pb plankto
TS_1	H6	CAGL0H04367g	WAR1	YML076C	1.03864	1.19197	1.24703	1.1654	1.16076	0.0882245	0.208387	>1SD	Pb plankto
2A_BM	B3	CAGL0J06974g	HOS3	YPL116W	1.1302	1.31543	1.12551	1.08947	1.16515	0.101823	0.225955	>1SD	0SD
TS_6	B1	CAGL0D01210g	ROK1	YGL171W	1.27398	1.35491	0.996159	1.03879	1.16596	0.175475	0.358751	>1SD	0SD
1A_BM	B4	CAGL0B03421g	HAP1	YLR256W	1.01614	1.29416	1.12918	1.22493	1.1661	0.120709	0.278022	>1SD	0SD
TS_1	D6	CAGL0E06248g	RCN1	YKL159C	1.40159	0.908168	1.23002	1.14067	1.17011	0.20547	0.493423	>1SD	Pb plankto
TS_7	F12	CAGL0G09042g	AFT2	YPL202C	1.1554	1.28085	1.06088	1.18724	1.17109	0.0907394	0.219971	>1SD	>1SD
TS_5	D11	CAGL0A00143g	MPC54	YOR177C	1.04802	0.973572	1.2871	1.37618	1.17122	0.191206	0.402609	>1SD	0SD
TS_7	D8	CAGL0I09922g	GNT1	YOR320C	1.22743	0.945392	1.21305	1.33193	1.17945	0.164786	0.386535	>1SD	0SD
1A_BM	H8	CAGL0H08239g	HST3	YOR025W	1.27498	1.25794	1.14319	1.04669	1.1807	0.106802	0.228292	>1SD	<1SD
TS_5	D10	CAGL0M13805g	SCW4	YGR279C	1.04204	1.04014	1.25125	1.3902	1.18091	0.171127	0.350063	>1SD	0SD
TS_6	C12	CAGL0K12320g	AIM3	YBR108W	1.13603	1.22387	1.19231	1.18146	1.18342	0.0363564	0.0878457	>1SD	>1SD
TS_9	H6	CAGL0D03146g	SYS1	YJL004C	1.18241	0.992384	1.28301	1.2772	1.18375	0.135656	0.290625	>1SD	0SD
TS_4	C4	CAGL0A01584g	AGA2	YGL032C	1.18512	0.997313	1.42326	1.14073	1.18661	0.176959	0.425946	>1SD	0SD
2A_BM	A4	CAGL0I04246g	SUT1	YGL162W	1.27814	1.19905	1.14201	1.12887	1.18702	0.0679562	0.149264	>1SD	0SD
TS_2	D8	CAGL0L01903g	RGT1	YKL038W	1.05598		1.32392		1.18995	0.189459	0.267936	>1SD	0SD
TS_1	D12	CAGL0F02519g	YJL206C	YJL206C	1.13191	1.13252	1.17722	1.35153	1.19829	0.104339	0.219624	>1SD	0SD
TS_9	H10	CAGL0E02079g	MSN1	YOL116W	1.24453	1.17392	1.20206	1.17665	1.19929	0.0327119	0.0706027	>1SD	Pb plankto
TS_9	F4	CAGL0I02508g	CTR2	YHR175W	1.39174	1.38281	1.10095	0.925904	1.20035	0.227392	0.465834	>1SD	Pb plankto
TS_5	H12	CAGL0F01441g	NIF3	YGL221C	1.29072	1.39056	0.971891	1.17196	1.20628	0.180005	0.418668	>1SD	>1SD
TS_4	C5	CAGL0A02486g	SBE2	YDR351W			1.26267	1.16653	1.2146	0.0679816	0.0961405	>1SD	>1SD
TS_1	G4	CAGL0G07667g	PRY2	YKR013W	1.22526	1.50784	1.03937	1.09406	1.21663	0.209222	0.468468	>1SD	Pb plankto
1A_BM	C2	CAGL0C05335g	RTG1	YOL067C	1.09267	1.21443	1.2099	1.37795	1.22374	0.117247	0.285288	>1SD	<2SD
TS_6	B9	CAGL0F06787g	MND2	YIR025W	1.18541	1.17706	1.41974	1.12698	1.2273	0.130861	0.292752	>1SD	Pb plankto
2A_BM	B4	CAGL0J07150g	PIP2	YOR363C	1.1404	1.09233	1.41181	1.26838	1.22823	0.143173	0.319477	>1SD	<1SD
TS_1	C12	CAGL0E03355g	BPT1	YLL015W	1.32767		1.13177		1.22972	0.138521	0.195898	>1SD	0SD
TS_9	E10	CAGL0H02519g	YMR253C	YMR253C	1.13243		1.3333		1.23287	0.142039	0.200873	>1SD	>1SD
TS_3	E12	CAGL0K09944g	PDE2	YOR360C	1.23861	1.35817	1.11324	1.23274	1.23569	0.100019	0.244926	>1SD	>2SD
1A_BM	G2	CAGL0G07249g	YOX1	YML027W	1.08243	1.076	1.38328	1.41681	1.23963	0.185753	0.340805	>1SD	>1SD
TS_6	F4	CAGL0G09999g	ATG13	YPR185W	1.1715	1.40927	1.0059	1.37196	1.23965	0.187583	0.403372	>1SD	>1SD
TS_9	H4	CAGL0L02651g	STE13	YOR219C	1.1721	1.39501	1.12937	1.27353	1.2425	0.118285	0.265633	>1SD	0SD
1A_BM	G1	CAGL0G06556g	PHO23	YNL097C	1.19778	1.49289	1.2094	1.07097	1.24276	0.178151	0.42192	>1SD	<2SD
TS_2	D9	CAGL0L02761g	STE4	YOR212W	1.52317	1.11012	1.16109	1.17728	1.24292	0.189016	0.413054	>1SD	>1SD
TS_6	G9	CAGL0F08041g	PFK1	YGR240C	1.22523		1.26457		1.2449	0.0278175	0.0393399	>1SD	<3SD
2A_BM	H3	CAGL0M09405g	RTG3	YBL103C	1.0731	1.2544	1.33759	1.3162	1.24532	0.120112	0.264495	>1SD	<1SD
2A_BM	G1	CAGL0M02651g	RDS2	YPL133C	1.22699	1.06841	1.41929	1.29057	1.25131	0.145835	0.350882	>1SD	Pb plankto
TS_1	G11	CAGL0H00396g	LEU3	YLR451W	1.1056		1.40311		1.25436	0.210366	0.297503	>1SD	0SD
TS_7	H12	CAGL0L04576g	YRR1	YOR162C	1.24014	1.33412	1.20489	1.24315	1.25558	0.0551689	0.129232	>1SD	>1SD
TS_2	B8	CAGL0J08206g	BNI1	YNL271C	1.40207	1.33226	1.32008	0.968395	1.2557	0.194914	0.433677	>1SD	<3SD
TS_6	F8	CAGL0M02431g	KES1	YPL145C	1.32971		1.20446		1.26709	0.0885653	0.12525	>1SD	<3SD
TS_2	D7	CAGL0L01771g	SOK2	YMR016C	1.31387	1.2939	1.23099	1.23968	1.26961	0.0405638	0.0828777	>1SD	>1SD
TS_1	B7	CAGL0C02277g	GLN3	YER040W	1.05239	1.2534	1.36708	1.40647	1.26983	0.158829	0.354087	>1SD	Pb plankto
1A_BM	E2	CAGL0F00803g	GAL11	YOL051W	1.24776	1.35358	1.02793	1.46102	1.27257	0.184881	0.433096	>1SD	0SD
TS_5	D3	CAGL0M03157g	TAX4	YJL083W	1.20824	1.49711	1.24997	1.14397	1.27482	0.154471	0.353138	>2SD	0SD	0.427704	NA
TS_5	B11	CAGL0L03696g	ECM3	YOR092W	1.26588	1.32078	1.04219	1.47779	1.27666	0.18027	0.435598	>2SD	>2SD
TS_1	A1	CAGL0A00451g	PDR1	YGL013C	1.42247	1.16417	1.01912	1.51097	1.27918	0.227387	0.49185	>2SD	Pb plankto
TS_5	C4	CAGL0L08140g	BPH1	YCR032W	1.39509	1.22362	1.27969	1.22824	1.28166	0.0797744	0.171468	>2SD	0SD	0.000411915	OK
TS_1	B5	CAGL0C01463g	TCO89	YPL180W	1.45157	1.29503	1.29888	1.09105	1.28413	0.147931	0.360516	>2SD	<1SD	0.000101841	Pb
2A_BM	G12	CAGL0M07634g	PHD1	YKL043W	1.3874	1.51925	1.19771	1.03812	1.28562	0.211288	0.481131	>2SD	>2SD
2A_BM	A5	CAGL0I05170g	CST6	YIL036W	1.15961	1.21664	1.3403	1.43777	1.28858	0.124821	0.27816	>2SD	<2SD
TS_3	E6	CAGL0L00627g	GPB2	YAL056W	1.2098		1.37339		1.29159	0.115677	0.163592	>2SD	>1SD	7.32606e-05	OK
TS_9	A9	CAGL0I03872g	SNF3	YDL194W	1.29396		1.29208		1.29302	0.00132722	0.00187697	>2SD	0SD	0.267671	NA
1A_BM	F1	CAGL0F06743g	DAL81	YIR023W	1.14972	1.3455	1.28884	1.41632	1.3001	0.113006	0.266605	>2SD	>2SD
TS_1	E1	CAGL0F02717g	PDR15	YDR406W	1.40356	1.47766	1.17256	1.20052	1.31358	0.150208	0.305101	>2SD	>2SD
1A_BM	A5	CAGL0A01628g	MIG1	YGL035C	1.07412	1.42364	1.34573	1.45903	1.32563	0.174223	0.38491	>2SD	>1SD	2.23459e-05	OK
TS_1	G2	CAGL0G05896g	DSE2	YHR143W	1.31218		1.33957		1.32587	0.019367	0.0273891	>2SD	>1SD	0.156942	NA
TS_2	C5	CAGL0K02673g	STE20	YHL007C	1.16346	1.3931	1.45182	1.31408	1.33062	0.124912	0.288357	>2SD	0SD	3.25928e-05	OK
TS_6	H4	CAGL0H09460g	FAA2	YER015W	1.27908	1.3439	1.33655	1.36402	1.33089	0.0364368	0.0849366	>2SD	0SD	0.128723	NA
1A_BM	F2	CAGL0F07315g	SNF4	YGL115W	1.32435	1.23035	1.38165	1.39273	1.33227	0.0742646	0.162386	>2SD	>2SD
TS_7	A10	CAGL0E01683g	MCK1	YNL307C	1.42737	1.19965	1.25111	1.51172	1.34746	0.146626	0.312068	>3SD	0SD	0.69169	NA
1A_BM	D2	CAGL0E00627g	SRB8	YCR081W	1.23405	1.39757	1.22544	1.53812	1.3488	0.149003	0.312684	>3SD	<1SD	0.0910339	NA
TS_9	F5	CAGL0K02827g	DID4	YKL002W	1.53001		1.18348		1.35675	0.245033	0.346528	>3SD	>2SD
1A_BM	H1	CAGL0H06215g	GAL11	YOL051W	1.50375	1.48041	1.1163	1.36415	1.36615	0.177407	0.387451	>3SD	0SD	0.00501087	OK
2A_BM	B9	CAGL0J10472g	SSN2	YDR443C	1.38969	1.4476	1.33383	1.30924	1.37009	0.0616686	0.138357	>3SD	0SD	3.82282e-05	OK
TS_6	D10	CAGL0J04312g	PEP1	YBL017C	1.57209		1.18529		1.37869	0.273503	0.386792	>3SD	0SD	0.107423	NA
TS_9	H9	CAGL0K09988g	TVP23	YDR084C	1.4476	1.42808	1.52623	1.1152	1.37928	0.181092	0.411032	>3SD	>1SD	0.222399	NA
TS_2	B9	CAGL0J08613g	YVC1	YOR087W	1.37314	1.43787	1.30591	1.40414	1.38027	0.0561773	0.131959	>3SD	0SD	6.53293e-06	OK
TS_2	C6	CAGL0K05423g	TIP41	YPR040W	1.30106	1.59666	1.15307	1.48562	1.3841	0.196432	0.443585	>3SD	<3SD
2A_BM	H1	CAGL0M08800g	YAP6	YDR259C	1.38439	1.34481	1.36788	1.46114	1.38955	0.0504105	0.116337	>3SD	0SD	0.00206422	OK
2A_BM	A6	CAGL0I07183g	SFL1	YOR140W	1.45021	1.2437	1.39929	1.52935	1.40564	0.120496	0.285656	>3SD	<3SD
2A_BM	G10	CAGL0M06875g	SSN8	YNL025C	1.25187	1.54731	1.40507	1.42331	1.40689	0.121135	0.295437	>3SD	0SD	0.00593175	OK
TS_4	A5	CAGL0L00583g	USV1	YPL230W	1.33827	1.29652	1.33876	1.65568	1.40731	0.166762	0.359164	>3SD	0SD	0.664888	NA
TS_4	A8	CAGL0L06424g	YDR134C	YDR134C	1.28765	1.59888	1.41321	1.46988	1.44241	0.129153	0.311232	>3SD	<1SD	1.00136e-05	OK
TS_5	H11	CAGL0F00781g	PEX2	YJL210W	1.46628	1.29918	1.42102	1.59307	1.44489	0.121402	0.293886	>3SD	0SD	0.00560914	OK
2A_BM	B11	CAGL0K03773g	SAS2	YMR127C	1.45303	1.55428	1.56252	1.24824	1.45452	0.146254	0.314281	>3SD	0SD	0.050897	NA
TS_9	C2	CAGL0K00715g	RTA1	YGR213C	1.36759		1.56976		1.46868	0.142958	0.202174	>3SD	>2SD
1A_BM	A4	CAGL0A00451g	PDR1	YGL013C	1.29774	1.41476	1.63167	1.65501	1.4998	0.172762	0.357273	>3SD	Pb plankto
TS_4	A7	CAGL0E01837g	YPS1	YLR120C	1.53504		1.6659		1.60047	0.0925325	0.130861	>3SD	<1SD	0.854778	NA
TS_1	C11	CAGL0E01771g	YPS6	YIR039C	1.52199	1.48727	1.75492	1.65055	1.60368	0.122877	0.267655	>3SD	>1SD	0.000620547	Pb
